# Supplementary material for: HIT'nDRIVE: patient-specific multidriver gene prioritization for precision oncology
Source: HighWire-hosted journal article supplement (doi:10.1101/gr.221218.117), 2017-07-18
Supplement: Supplemental_Table_S1.xlsx [file Supplemental_Table_S1.xlsx]

## Sheet: Supplemental_Table_S1
Supplemental Table S1. TCGA-GBM Driver Gene statistics.
Driver.Gene	Alteration.Frequency	Alteration.Percentage	No.of.Samples.with
			SNV	Amplification	Homozygous.Deletion	Gene.Fusion
EGFR	93	36.05	90	40	0	6
TP53	76	29.46	76	0	1	0
PTEN	73	28.29	67	0	6	0
CHEK2	67	25.97	78	0	0	0
CDKN2A	41	15.89	2	0	39	0
RB1	33	12.79	31	0	2	0
SEC61G	31	12.02	0	31	0	0
MUC16	29	11.24	29	0	0	0
SLC25A13	28	10.85	27	1	0	0
PIK3CA	22	8.53	21	3	0	0
FLG	21	8.14	21	0	0	0
GSTT1	21	8.14	0	0	21	0
IFNA10	19	7.36	1	0	18	0
NF1	19	7.36	19	0	0	0
OS9	19	7.36	3	16	0	2
PDGFRA	17	6.59	9	11	0	0
PIK3R1	17	6.59	17	0	0	0
ANK2	16	6.2	16	1	0	1
HMCN1	15	5.81	15	0	0	0
THAP3	15	5.81	15	0	0	0
PIK3C3	14	5.43	14	0	0	0
IDH1	13	5.04	13	0	0	0
MDM2	13	5.04	3	9	0	1
CHL1	10	3.88	10	0	0	0
CNTNAP2	10	3.88	10	1	0	0
CHIC2	9	3.49	0	9	0	0
PIP4K2C	9	3.49	2	7	0	1
SYNE1	9	3.49	9	0	0	0
BCL11A	8	3.1	8	0	0	0
FN1	8	3.1	8	0	0	0
ABCB1	7	2.71	7	0	0	0
DNAH8	7	2.71	7	0	0	0
FGFR3	7	2.71	4	0	0	3
GRM3	7	2.71	6	1	0	0
UBC	7	2.71	7	0	0	0
ITGB2	6	2.33	6	0	0	0
CUBN	5	1.94	5	1	0	0
DNAH7	5	1.94	5	0	0	0
F5	5	1.94	5	0	0	0
HUWE1	5	1.94	4	1	0	0
NLRP3	5	1.94	6	0	0	0
PEX5L	5	1.94	2	3	0	0
SACS	5	1.94	5	0	0	0
TMPRSS6	5	1.94	5	0	0	0
TPBG	5	1.94	5	0	0	0
ANK1	4	1.55	5	0	0	0
DPP10	4	1.55	4	0	0	0
TIAM2	4	1.55	4	0	0	0
