# Supplementary material for: HIT'nDRIVE: patient-specific multidriver gene prioritization for precision oncology
Source: HighWire-hosted journal article supplement (doi:10.1101/gr.221218.117), 2017-07-18
Supplement: Supplemental_Table_S2.xlsx [file Supplemental_Table_S2.xlsx]

## Sheet: Supplemental_Table_S2
Supplemental Table S2. TCGA-OV Driver Gene statistics.
Driver.Gene	Alteration.Frequency	Alteration.Percentage	No.of.Samples.with
			SNV	Amplification	Homozygous.Deletion	Gene.Fusion
TP53	307	58.37	306	2	2	0
GSTT1	170	32.32	0	18	152	0
WWOX	148	28.14	0	40	109	0
FAM49B	79	15.02	0	79	0	0
UGT2B17	77	14.64	0	4	73	0
CCNE1	69	13.12	0	69	0	0
SLC39A4	69	13.12	0	69	0	0
MYC	66	12.55	0	66	0	0
SHARPIN	65	12.36	2	63	0	0
NDRG1	57	10.84	2	54	1	0
POP4	54	10.27	0	54	0	0
NF1	50	9.51	21	0	31	0
RB1	45	8.56	12	0	34	1
PPP2R2A	41	7.79	2	0	38	1
ATXN10	40	7.6	1	0	38	1
KRAS	38	7.22	5	33	0	0
TNPO2	38	7.22	1	37	0	0
GCDH	37	7.03	1	36	0	0
TNKS	37	7.03	1	0	36	0
WNK1	37	7.03	3	19	16	0
MUC16	36	6.84	18	14	4	0
CALR	35	6.65	1	34	0	0
MACF1	35	6.65	10	25	0	0
PDPR	35	6.65	0	0	35	0
BRD1	34	6.46	1	1	32	0
RYR1	33	6.27	9	24	1	0
RAB8A	32	6.08	0	32	0	0
SIGLEC5	31	5.89	0	1	30	0
PRKCI	30	5.7	0	30	0	0
SMARCA4	30	5.7	3	25	2	0
SSPN	30	5.7	0	30	0	0
EIF4G1	29	5.51	2	27	0	0
SOX5	29	5.51	6	22	1	0
WRN	29	5.51	3	0	26	0
CARM1	28	5.32	2	24	1	1
PDE4D	28	5.32	1	1	26	0
MGAM	27	5.13	5	5	18	0
ALG12	26	4.94	0	0	26	0
RFX1	26	4.94	1	24	0	1
VPS8	25	4.75	1	24	0	0
LPP	24	4.56	2	20	2	1
NDUFS5	22	4.18	0	22	0	0
PSENEN	22	4.18	1	21	0	0
CPT1B	21	3.99	4	1	16	0
PHC3	21	3.99	1	21	0	0
STK38L	21	3.99	2	19	0	0
BRCA1	20	3.8	13	0	7	0
FXR1	19	3.61	2	18	0	0
MAP3K1	19	3.61	1	0	18	0
PPARA	19	3.61	1	0	18	0
TNIK	19	3.61	4	15	0	0
DAP	18	3.42	0	17	1	0
SORBS2	18	3.42	4	0	15	0
MUC4	17	3.23	4	13	1	0
OGFR	17	3.23	1	16	0	0
PI4KB	17	3.23	5	13	0	0
SYNE1	17	3.23	12	1	3	1
CREBBP	16	3.04	7	0	9	0
FDFT1	16	3.04	0	0	15	1
MTAP	16	3.04	0	0	16	0
BRCA2	15	2.85	10	0	6	0
THRAP3	15	2.85	4	11	0	0
PTPRF	14	2.66	5	10	0	0
FBXW7	13	2.47	4	0	10	0
MYO1F	13	2.47	2	9	2	0
POLB	13	2.47	1	11	1	0
DTNA	12	2.28	4	5	3	0
GEMIN4	12	2.28	2	6	5	0
LRP2BP	11	2.09	2	0	9	0
RFX5	11	2.09	1	10	0	0
SLC25A4	11	2.09	2	0	9	0
VPS39	11	2.09	1	0	10	0
SNAP23	10	1.9	1	1	8	0
CD47	9	1.71	1	9	0	0
MAPK1	9	1.71	0	2	7	0
SORCS3	9	1.71	5	0	4	0
ABR	8	1.52	0	2	6	0
LIFR	8	1.52	2	6	0	0
SF3B4	8	1.52	3	5	0	0
FOXK2	7	1.33	0	3	4	0
HIC1	7	1.33	0	7	0	0
SPAM1	6	1.14	6	0	0	0
TRIP10	6	1.14	2	1	3	0
ASPA	5	0.95	1	0	4	0
MTO1	1	0.19	0	1	0	0
