# Supplementary material for: HIT'nDRIVE: patient-specific multidriver gene prioritization for precision oncology
Source: HighWire-hosted journal article supplement (doi:10.1101/gr.221218.117), 2017-07-18
Supplement: Supplemental_Table_S3.xlsx [file Supplemental_Table_S3.xlsx]

## Sheet: Supplemental_Table_S3
Supplemental Table S3. TCGA-PRAD Driver Gene statistics.
Driver.Gene	Alteration.Frequency	Alteration.Percentage	No.of.Samples.with
			SNV	Amplification	Homozygous.Deletion	Gene.Fusion
SPECC1L	79	23.72	1	1	78	0
NSD1	54	16.22	2	52	0	0
SIRPB1	54	16.22	7	42	6	0
PTEN	52	15.62	14	0	38	1
STEAP1B	43	12.91	1	5	37	0
MUC4	37	11.11	37	0	0	0
SPOP	35	10.51	35	0	0	0
WWOX	34	10.21	0	4	34	0
TP53	33	9.91	33	0	0	0
KIAA1217	24	7.21	3	0	21	0
ERG	19	5.71	0	0	0	19
SYNE1	19	5.71	18	0	0	1
NRG1	18	5.41	4	12	3	0
NBPF1	17	5.11	17	0	0	0
GUCY1B3	16	4.8	0	1	15	0
ATM	14	4.2	14	0	0	0
FOXA1	14	4.2	14	0	0	0
OBSCN	14	4.2	14	0	0	0
SGK1	14	4.2	0	0	14	0
ST6GAL2	13	3.9	1	0	12	0
RYR1	11	3.3	11	0	0	0
BCLAF1	10	3	10	0	0	0
ZMYM3	10	3	10	0	0	0
NRG3	9	2.7	3	0	6	0
POLR2D	9	2.7	0	8	1	0
AGAP10	8	2.4	10	0	0	0
BRAF	8	2.4	6	0	0	2
MED12	7	2.1	7	0	0	0
PKHD1	7	2.1	7	0	0	0
COL12A1	6	1.8	6	0	0	0
DNAH9	6	1.8	6	0	0	0
STAB2	6	1.8	6	0	0	0
ACAN	5	1.5	5	0	0	0
CDKN1B	5	1.5	5	0	0	0
NKX3-1	5	1.5	5	0	0	0
PCYT1B	5	1.5	0	0	5	0
IDH1	4	1.2	4	0	0	0
MCPH1	4	1.2	2	0	2	0
MYOF	4	1.2	4	0	0	0
HTR7	3	0.9	0	0	3	0
