# Supplementary material for: HIT'nDRIVE: patient-specific multidriver gene prioritization for precision oncology
Source: HighWire-hosted journal article supplement (doi:10.1101/gr.221218.117), 2017-07-18
Supplement: Supplemental_Table_S4.xlsx [file Supplemental_Table_S4.xlsx]

## Sheet: Supplemental_Table_S4
Supplemental Table S4. TCGA-BRCA Driver Gene statistics.
Driver.Gene	Alteration.Frequency	Alteration.Percentage	No.of.Samples.with
			SNV	Amplification	Homozygous.Deletion	Gene.Fusion
PIK3CA	333	30.55	333	0	0	1
TP53	330	30.28	330	0	0	0
CDH1	123	11.28	120	0	2	2
WWOX	118	10.83	2	2	116	0
GATA3	114	10.46	115	0	0	1
NSD1	95	8.72	11	86	0	3
MED1	76	6.97	4	32	35	5
MUC16	76	6.97	76	0	0	0
MAP3K1	75	6.88	75	0	0	1
MUC12	73	6.7	73	0	0	0
ARID2	70	6.42	12	2	58	1
GUCY1B3	68	6.24	2	0	67	0
DPP6	58	5.32	7	2	46	3
SIRPB1	55	5.05	6	41	10	0
DMD	53	4.86	38	0	16	1
RYR2	47	4.31	46	2	2	1
CHL1	46	4.22	6	0	40	0
MUC5B	44	4.04	44	0	0	0
PTEN	44	4.04	44	0	0	0
GALNTL6	42	3.85	5	11	26	0
PPP2R3A	40	3.67	5	2	35	0
COL14A1	38	3.49	19	1	23	0
SHANK2	38	3.49	16	18	4	1
MACF1	37	3.39	37	0	0	1
ACACA	36	3.3	11	24	0	1
CES1	35	3.21	5	0	31	0
FGFR1	35	3.21	3	32	2	1
CDH13	34	3.12	1	2	31	0
PTPRD	34	3.12	19	3	15	0
FMN2	33	3.03	21	0	13	0
GPR98	32	2.94	32	1	2	0
NCOA3	32	2.94	31	2	0	0
APOB	29	2.66	29	0	0	0
DSPP	29	2.66	29	0	0	0
INTS4	28	2.57	4	24	0	3
LRBA	27	2.48	25	0	4	3
RPGR	27	2.48	28	1	2	2
SLC25A17	27	2.48	0	0	27	0
KCNQ5	26	2.39	11	2	16	0
PIK3R1	26	2.39	26	0	0	1
ANK2	23	2.11	23	0	0	0
CCND1	23	2.11	1	22	0	0
MGAM	23	2.11	18	2	3	0
USP32	23	2.11	14	4	0	5
CECR2	22	2.02	13	7	3	0
INADL	22	2.02	11	0	13	1
RBMX	22	2.02	22	0	0	0
DMXL2	21	1.93	21	1	1	1
NRXN2	21	1.93	20	1	3	0
SMARCA2	21	1.93	11	0	11	0
PTPRM	20	1.83	8	8	4	1
RSRC1	20	1.83	2	0	19	0
AKAP6	19	1.74	16	1	4	0
GNAS	19	1.74	14	6	0	0
CDK12	18	1.65	14	1	2	3
DNAH8	18	1.65	18	0	2	0
LCT	18	1.65	18	0	0	0
SCN2A	18	1.65	18	0	0	0
AHNAK	17	1.56	17	0	0	0
BRCA2	17	1.56	17	0	0	0
DNAH6	17	1.56	17	2	0	0
NOX4	17	1.56	3	3	10	1
KDM4C	16	1.47	9	0	9	0
RIMS1	16	1.47	11	2	4	0
TRIO	16	1.47	13	1	3	1
AGAP1	15	1.38	9	0	5	2
TBC1D5	15	1.38	5	0	10	0
USP9X	15	1.38	15	0	0	0
CNOT1	14	1.28	14	0	0	0
SPAG17	14	1.28	12	0	0	2
SYNJ2	14	1.28	8	0	8	0
DPP10	13	1.19	9	0	5	0
FMN1	13	1.19	8	0	5	0
LRRK1	13	1.19	13	2	0	1
MDGA2	13	1.19	12	0	4	0
UBE3A	13	1.19	4	0	9	0
ATAD5	12	1.1	9	1	2	1
THBS3	12	1.1	5	7	0	1
HECTD1	11	1.01	12	0	0	0
APBA1	10	0.92	8	0	3	0
CNTN1	10	0.92	12	0	0	0
COL1A1	10	0.92	8	4	0	0
MST1	10	0.92	10	0	0	0
PHF12	10	0.92	10	2	0	0
PIK3C2B	10	0.92	10	0	0	0
ARHGAP26	9	0.83	7	0	2	0
ATP2B1	9	0.83	9	0	0	0
FDFT1	9	0.83	4	0	5	0
KSR1	9	0.83	5	3	0	2
CATSPERG	8	0.73	6	1	1	0
CDC16	8	0.73	4	0	4	0
ALCAM	7	0.64	5	0	0	2
NELL2	7	0.64	4	0	3	0
OTUD4	7	0.64	7	0	0	0
PAPOLA	7	0.64	4	0	2	1
ROCK1	7	0.64	5	0	0	2
TRIP12	7	0.64	7	0	0	1
GABBR2	6	0.55	4	0	2	0
CBX8	5	0.46	5	0	0	0
CNGB1	5	0.46	3	0	2	0
KATNAL1	5	0.46	3	1	1	0
PHF11	5	0.46	2	0	3	0
SLC34A1	5	0.46	3	0	2	0
DTNB	4	0.37	4	0	0	0
E2F3	4	0.37	2	1	1	0
ITGA2	4	0.37	4	0	0	0
PARD3B	4	0.37	2	1	1	0
