# Supplementary material for: HIT'nDRIVE: patient-specific multidriver gene prioritization for precision oncology
Source: HighWire-hosted journal article supplement (doi:10.1101/gr.221218.117), 2017-07-18
Supplement: Supplemental_Table_S5.xlsx [file Supplemental_Table_S5.xlsx]

## Sheet: Supplemental_Table_S5
Supplemental Table S5. Patient Specific Driver Genes of TCGA-GBM.
TCGA.Sample.ID	Genes
TCGA-02-0001-01	CDKN2A,CHEK2,GSTT1
TCGA-02-0003-01	CHEK2,EGFR,OS9,PIK3R1,PIP4K2C,SEC61G,SLC25A13,TP53
TCGA-02-0007-01	EGFR,GSTT1,PTEN,RB1
TCGA-02-0009-01	CDKN2A,CHEK2,EGFR,IFNA10,SEC61G
TCGA-02-0010-01	EGFR,FN1,TP53
TCGA-02-0011-01	PIK3C3,RB1,TP53
TCGA-02-0014-01	CDKN2A,CHEK2,CHIC2,IFNA10,ITGB2,PDGFRA,PTEN
TCGA-02-0015-01	ANK2,BCL11A,CDKN2A,CHEK2,IFNA10,PTEN,RB1,THAP3,TPBG
TCGA-02-0016-01	CDKN2A,EGFR,THAP3
TCGA-02-0021-01	CDKN2A,CHEK2,EGFR,GSTT1,SEC61G
TCGA-02-0024-01	CDKN2A,CHIC2,GSTT1,PDGFRA,TP53
TCGA-02-0025-01	ANK2,CHEK2,SLC25A13
TCGA-02-0026-01	CHEK2,TP53
TCGA-02-0028-01	BCL11A,CHEK2
TCGA-02-0033-01	NF1,PIK3CA,RB1,TP53
TCGA-02-0038-01	CDKN2A,CHEK2,EGFR,IFNA10,PTEN
TCGA-02-0043-01	CDKN2A,EGFR,IFNA10,OS9,PTEN
TCGA-02-0046-01	CHEK2,EGFR,OS9,SEC61G,SLC25A13,TP53
TCGA-02-0047-01	BCL11A,CDKN2A,PDGFRA,PIK3CA,RB1,SLC25A13
TCGA-02-0048-01	CDKN2A,CHEK2,EGFR,PEX5L,PIK3CA,RB1,SEC61G,THAP3,TP53
TCGA-02-0052-01	CHEK2,MDM2,RB1,SLC25A13
TCGA-02-0054-01	CHEK2,PIK3C3,TP53
TCGA-02-0055-01	PTEN,TP53,UBC
TCGA-02-0057-01	CHEK2
TCGA-02-0058-01	GSTT1,TP53
TCGA-02-0060-01	CHEK2,GSTT1,OS9
TCGA-02-0068-01	CDKN2A,CHEK2,EGFR,SLC25A13,THAP3
TCGA-02-0069-01	CHEK2,CHIC2,CUBN,OS9,PDGFRA
TCGA-02-0070-01	CDKN2A,CHL1
TCGA-02-0075-01	CHEK2,PTEN,TP53
TCGA-02-0079-01	ANK2,CHIC2,PDGFRA,PTEN,THAP3
TCGA-02-0083-01	BCL11A,CHEK2,FN1,HUWE1,SLC25A13
TCGA-02-0084-01	CHEK2,CHL1,GSTT1,TP53
TCGA-02-0085-01	CHEK2,GSTT1,MDM2,PIK3C3,SLC25A13
TCGA-02-0089-01	CDKN2A,CHEK2,EGFR,IFNA10,TP53
TCGA-02-0099-01	MDM2,OS9,PTEN,SLC25A13
TCGA-02-0104-01	ANK2,CDKN2A,CHEK2,RB1
TCGA-02-0107-01	GSTT1
TCGA-02-0114-01	CHL1,FN1,SLC25A13,TP53
TCGA-02-0115-01	CDKN2A,CHEK2,IFNA10
TCGA-02-0116-01	CDKN2A,EGFR,IFNA10,SEC61G
TCGA-02-2470-01	CNTNAP2,PTEN
TCGA-02-2483-01	CHL1,IDH1,TP53
TCGA-02-2485-01	EGFR,FLG,MUC16,PIK3CA,TP53
TCGA-06-0128-01	CHEK2,IDH1,OS9,PIK3R1,RB1,SACS,SLC25A13,TP53
TCGA-06-0129-01	IDH1,OS9,PIK3R1,RB1,TP53,UBC
TCGA-06-0130-01	RB1,TP53
TCGA-06-0132-01	CHL1
TCGA-06-0137-01	CDKN2A,CHEK2,EGFR,GSTT1,IFNA10,OS9,SEC61G,SLC25A13
TCGA-06-0138-01	CHEK2,EGFR,FN1,MDM2,OS9,PIP4K2C,PTEN
TCGA-06-0139-01	CHEK2,SLC25A13
TCGA-06-0140-01	RB1
TCGA-06-0141-01	CHEK2,PIK3C3,SACS
TCGA-06-0142-01	CHEK2,EGFR,GSTT1,PIK3C3,SEC61G,SLC25A13
TCGA-06-0143-01	CDKN2A,CHEK2,CHIC2,EGFR,PDGFRA,PIK3C3,SLC25A13
TCGA-06-0145-01	CHEK2,OS9,PIK3C3,RB1,SLC25A13
TCGA-06-0147-01	FN1,PIK3C3,SLC25A13
TCGA-06-0148-01	CDKN2A,EGFR,IFNA10
TCGA-06-0151-01	ITGB2
TCGA-06-0152-01	ANK2,CHEK2,EGFR,GSTT1,HMCN1,MDM2,MUC16,SEC61G
TCGA-06-0154-01	CDKN2A,CNTNAP2,EGFR,F5,FLG,IFNA10,SEC61G,SLC25A13
TCGA-06-0155-01	EGFR,MDM2,PTEN
TCGA-06-0157-01	CHEK2,EGFR,OS9,PIP4K2C,PTEN,SEC61G
TCGA-06-0158-01	CDKN2A,CHEK2,EGFR,FLG,IFNA10,ITGB2,SEC61G
TCGA-06-0167-01	ITGB2
TCGA-06-0169-01	CHEK2,EGFR,MUC16,SEC61G
TCGA-06-0171-01	CDKN2A,CHEK2,PIK3C3,PIP4K2C,RB1
TCGA-06-0173-01	CNTNAP2,DNAH8,EGFR,MDM2,MUC16,OS9,SEC61G
TCGA-06-0174-01	CHIC2,EGFR,GSTT1,MDM2,OS9,PDGFRA,PIK3C3,PIP4K2C,SEC61G,TPBG
TCGA-06-0178-01	SYNE1
TCGA-06-0184-01	CHEK2,GSTT1,HMCN1,NF1,PTEN,RB1,SLC25A13,TP53
TCGA-06-0185-01	CDKN2A,EGFR,HMCN1,IFNA10,SEC61G,TPBG
TCGA-06-0187-01	CDKN2A,EGFR,MDM2,PTEN,SEC61G,TPBG
TCGA-06-0188-01	CDKN2A,GSTT1,PTEN,RB1,SLC25A13,TP53
TCGA-06-0189-01	CHEK2,HMCN1,MUC16,TP53
TCGA-06-0190-01	PTEN,TP53
TCGA-06-0192-01	ABCB1,NF1,PTEN
TCGA-06-0195-01	CHEK2,DNAH8,EGFR,PIK3C3,PTEN,RB1,SEC61G,TIAM2,TP53
TCGA-06-0197-01	CHEK2,PIK3C3,TP53
TCGA-06-0201-01	CHEK2
TCGA-06-0206-01	CHEK2,RB1,SLC25A13
TCGA-06-0208-01	CDKN2A,EGFR,IFNA10,PIK3C3,PTEN,SEC61G,SLC25A13
TCGA-06-0210-01	CDKN2A,CHEK2,CHIC2,GSTT1,IFNA10,PDGFRA
TCGA-06-0213-01	CHEK2,FLG,PDGFRA,PTEN,RB1,SLC25A13
TCGA-06-0214-01	MUC16,NF1,PDGFRA
TCGA-06-0216-01	MUC16,PTEN
TCGA-06-0219-01	CHEK2,EGFR,SLC25A13,TPBG
TCGA-06-0237-01	CHL1,DNAH8,EGFR,GSTT1,PIK3C3,SEC61G,TP53
TCGA-06-0238-01	CHEK2,GSTT1,OS9,PIP4K2C,TP53
TCGA-06-0241-01	CDKN2A,CHEK2,CHIC2,PDGFRA,RB1,TP53
TCGA-06-0644-01	CDKN2A,CHEK2,FGFR3,IFNA10,PTEN,SLC25A13,TP53
TCGA-06-0645-01	ANK2,EGFR,PTEN,SEC61G,SLC25A13,SYNE1
TCGA-06-0646-01	CDKN2A,CHEK2,EGFR,MUC16,PTEN,TP53
TCGA-06-0648-01	CDKN2A,CHEK2,MDM2,PTEN,RB1
TCGA-06-0649-01	ANK2,EGFR,PTEN
TCGA-06-0650-01	EGFR
TCGA-06-0743-01	EGFR,FLG,PTEN,TP53
TCGA-06-0744-01	TP53
TCGA-06-0745-01	ABCB1,EGFR,MUC16
TCGA-06-0747-01	EGFR,NLRP3
TCGA-06-0876-01	EGFR,PTEN,SYNE1,TP53
TCGA-06-0877-01	PIK3R1
TCGA-06-0878-01	EGFR,TMPRSS6,UBC
TCGA-06-0879-01	EGFR,PIK3CA
TCGA-06-0881-01	EGFR,PTEN
TCGA-06-0882-01	PTEN
TCGA-06-0939-01	FLG,PTEN,RB1
TCGA-06-1804-01	ANK2,EGFR,PEX5L,PTEN
TCGA-06-2557-01	CDKN2A,EGFR
TCGA-06-2561-01	BCL11A,EGFR,PTEN
TCGA-06-2562-01	NF1,PIK3R1
TCGA-06-2563-01	EGFR,TP53
TCGA-06-2564-01	FLG
TCGA-06-2565-01	ANK1,EGFR,PTEN
TCGA-06-2567-01	EGFR,PIP4K2C,TP53
TCGA-06-2569-01	NF1,TP53
TCGA-06-2570-01	ABCB1,FLG,IDH1,PIK3CA,TP53
TCGA-06-5408-01	F5,TP53
TCGA-06-5410-01	GRM3,NF1
TCGA-06-5411-01	DNAH7,PTEN,UBC
TCGA-06-5413-01	EGFR,PIK3CA
TCGA-06-5414-01	GRM3
TCGA-06-5415-01	MDM2,TMPRSS6
TCGA-06-5417-01	IDH1,PIK3CA,TP53
TCGA-06-5418-01	F5,ITGB2,PTEN
TCGA-06-5856-01	BCL11A,EGFR
TCGA-06-5859-01	BCL11A
TCGA-06-6388-01	FLG,PIK3R1
TCGA-06-6389-01	IDH1,TP53
TCGA-06-6390-01	MUC16,NLRP3,SACS
TCGA-06-6391-01	PIK3CA
TCGA-06-6694-01	FLG,GRM3,HMCN1,TP53
TCGA-06-6695-01	DNAH8,EGFR,PIK3R1
TCGA-06-6698-01	NF1,RB1,TP53
TCGA-06-6701-01	IDH1,TP53
TCGA-08-0245-01	PDGFRA,THAP3,TP53
TCGA-08-0246-01	CDKN2A,CHEK2,EGFR,SEC61G,SLC25A13,THAP3
TCGA-08-0344-01	THAP3
TCGA-08-0347-01	CDKN2A,CHIC2,PDGFRA,PTEN,RB1
TCGA-08-0351-01	GSTT1,TP53
TCGA-08-0353-01	CDKN2A,CHEK2,EGFR,IFNA10,PEX5L,PIK3CA,PTEN,SEC61G
TCGA-08-0354-01	ANK2,CDKN2A,CHEK2,EGFR,SEC61G,THAP3
TCGA-08-0356-01	EGFR,SEC61G
TCGA-08-0357-01	CDKN2A,EGFR,SLC25A13,THAP3
TCGA-08-0358-01	ANK2,CDKN2A,CHEK2,EGFR,IFNA10,SEC61G,THAP3
TCGA-08-0360-01	EGFR,SEC61G,TP53
TCGA-08-0373-01	ANK2,CHEK2,RB1,THAP3,TP53
TCGA-08-0375-01	CDKN2A,CHEK2,EGFR,SEC61G
TCGA-08-0386-01	CHEK2,GSTT1,PTEN
TCGA-08-0389-01	CHEK2,THAP3
TCGA-08-0390-01	CHEK2,EGFR,SEC61G,THAP3
TCGA-12-0615-01	DNAH7,FLG
TCGA-12-0616-01	EGFR,HUWE1,MDM2,OS9,PIP4K2C,SEC61G,THAP3
TCGA-12-0618-01	GSTT1,MDM2,OS9,PEX5L,PIK3CA,PIP4K2C,PTEN,TP53
TCGA-12-0619-01	CHEK2,EGFR,RB1,SEC61G,TP53
TCGA-12-0688-01	CNTNAP2,PIK3R1
TCGA-12-0821-01	FGFR3,PIK3CA,SYNE1
TCGA-12-1597-01	CNTNAP2,PTEN,UBC
TCGA-12-3649-01	ANK2,CUBN,PTEN
TCGA-12-3652-01	EGFR
TCGA-12-3653-01	ABCB1,GRM3
TCGA-12-5295-01	CNTNAP2,FGFR3,FN1,MUC16
TCGA-12-5299-01	DNAH8
TCGA-12-5301-01	FGFR3,MUC16,PIK3CA
TCGA-14-0740-01	MUC16,PDGFRA,TP53
TCGA-14-0781-01	MUC16,PTEN
TCGA-14-0786-01	EGFR
TCGA-14-0787-01	HMCN1
TCGA-14-0789-01	CHL1,EGFR,GRM3,NF1
TCGA-14-0790-01	DPP10,EGFR,IFNA10,PIK3R1,TIAM2
TCGA-14-0813-01	CHL1,EGFR,HMCN1,PTEN,TP53
TCGA-14-0862-01	MUC16,PIK3R1
TCGA-14-0871-01	ANK2,NF1,SYNE1,TP53
TCGA-14-1043-01	NF1
TCGA-14-1395-01	CUBN,EGFR,HMCN1,PTEN
TCGA-14-1450-01	CHEK2
TCGA-14-1456-01	EGFR,IDH1,PIK3R1,TP53
TCGA-14-1823-01	EGFR,HUWE1
TCGA-14-1825-01	TP53
TCGA-14-1829-01	EGFR,MUC16
TCGA-15-0742-01	CHL1,EGFR,ITGB2,MUC16,PIK3CA
TCGA-15-1444-01	IDH1,PIK3R1,TP53
TCGA-16-0846-01	BCL11A,PTEN,TP53
TCGA-16-0861-01	CNTNAP2,FLG,PTEN
TCGA-16-1045-01	ABCB1,EGFR,HUWE1,PTEN
TCGA-16-1048-01	EGFR,PIK3CA
TCGA-19-1390-01	MUC16,PDGFRA,TP53
TCGA-19-1790-01	ANK2,EGFR,FGFR3,OS9,PIK3CA,TIAM2
TCGA-19-2619-01	F5
TCGA-19-2620-01	DNAH7,EGFR,HMCN1,NF1
TCGA-19-2623-01	FLG,RB1,TP53
TCGA-19-2624-01	EGFR
TCGA-19-2625-01	EGFR,FGFR3,MUC16,PTEN,RB1,TP53
TCGA-19-2629-01	IDH1,PIK3R1,TMPRSS6,TP53
TCGA-19-4068-01	DPP10
TCGA-19-5953-01	ABCB1,NF1,PTEN,UBC
TCGA-26-1439-01	EGFR
TCGA-26-1442-01	IDH1,TP53
TCGA-26-5132-01	ANK1,PTEN,RB1
TCGA-26-5134-01	PDGFRA
TCGA-26-5136-01	PIK3CA,TP53
TCGA-26-5139-01	CHL1,EGFR,PIK3R1,TMPRSS6
TCGA-26-6173-01	FLG
TCGA-26-6174-01	PIK3R1,PTEN
TCGA-27-1830-01	MUC16,TP53
TCGA-27-1831-01	EGFR,MUC16,NLRP3,PDGFRA
TCGA-27-1832-01	TMPRSS6
TCGA-27-1834-01	FLG,PTEN
TCGA-27-1835-01	ABCB1,TP53
TCGA-27-1836-01	TP53
TCGA-27-1837-01	PTEN
TCGA-27-1838-01	ANK1,EGFR,PIK3CA,PTEN,TP53
TCGA-27-2518-01	DPP10
TCGA-27-2519-01	PTEN,TP53
TCGA-27-2521-01	IDH1,TP53
TCGA-27-2523-01	HMCN1
TCGA-27-2524-01	MUC16,PTEN,RB1
TCGA-27-2526-01	ANK2,MUC16,PTEN
TCGA-27-2528-01	EGFR,SYNE1
TCGA-28-1747-01	EGFR,MUC16
TCGA-28-2501-01	CNTNAP2,HMCN1,MUC16,NLRP3
TCGA-28-2502-01	FLG,NF1,PTEN,SYNE1
TCGA-28-2509-01	TP53
TCGA-28-2510-01	FLG,HMCN1,PTEN
TCGA-28-2513-01	HMCN1,MUC16,PIK3R1,PTEN
TCGA-28-5208-01	NF1,NLRP3
TCGA-28-5209-01	EGFR,PTEN
TCGA-28-5211-01	FLG,SYNE1
TCGA-28-5213-01	EGFR,MUC16,SACS
TCGA-28-5215-01	ANK1
TCGA-28-5216-01	DNAH7,PTEN,TP53
TCGA-28-5218-01	HMCN1,HUWE1
TCGA-28-5219-01	DNAH7,TP53
TCGA-28-5220-01	UBC
TCGA-28-6450-01	CUBN,FLG,NF1,PIK3CA
TCGA-32-1970-01	EGFR,GRM3,RB1,TP53
TCGA-32-1977-01	CNTNAP2,DNAH8,PTEN
TCGA-32-1979-01	EGFR,PIK3CA
TCGA-32-1980-01	MUC16,NF1
TCGA-32-1982-01	EGFR,PTEN,SYNE1
TCGA-32-1986-01	CHEK2,CUBN,GRM3,NF1
TCGA-32-1991-01	EGFR,PIK3R1,PTEN
TCGA-32-2494-01	HMCN1,NF1,TIAM2
TCGA-32-2495-01	OS9,PIK3CA,PTEN
TCGA-32-2498-01	CHEK2,FGFR3,SACS
TCGA-32-2632-01	CNTNAP2,EGFR,F5,FLG,RB1
TCGA-32-2638-01	CDKN2A
TCGA-32-4208-01	IDH1,TP53
TCGA-32-4209-01	PEX5L
TCGA-32-4210-01	DPP10,PTEN,TP53
TCGA-32-4211-01	ANK2,MUC16
TCGA-32-4213-01	DNAH8,FN1,PTEN,RB1
TCGA-32-4719-01	FN1
TCGA-32-5222-01	PTEN
TCGA-41-2571-01	CHEK2,PTEN
TCGA-41-2572-01	CHEK2,PIK3CA
TCGA-41-2573-01	PTEN
TCGA-41-2575-01	FLG,TP53
