# Supplementary material for: HIT'nDRIVE: patient-specific multidriver gene prioritization for precision oncology
Source: HighWire-hosted journal article supplement (doi:10.1101/gr.221218.117), 2017-07-18
Supplement: Supplemental_Table_S6.xlsx [file Supplemental_Table_S6.xlsx]

## Sheet: Supplemental_Table_S6
Supplemental Table S6. Patient Specific Driver Genes of TCGA-OV
TCGA.Sample.ID	Genes
TCGA-09-0366-01	TP53
TCGA-09-0369-01	PSENEN,TP53
TCGA-13-0720-01	GSTT1
TCGA-13-0723-01	THRAP3
TCGA-13-0724-01	CREBBP,TP53
TCGA-13-0726-01	TP53
TCGA-13-0751-01	CCNE1,LPP,PRKCI,SORBS2,TP53,WWOX
TCGA-13-0755-01	FAM49B,MUC16,MYC,PDPR,SLC39A4,WWOX
TCGA-13-0765-01	GSTT1,SIGLEC5,TP53
TCGA-13-0766-01	PDE4D,WWOX
TCGA-13-0791-01	TP53
TCGA-13-0795-01	ATXN10,TP53
TCGA-13-0797-01	RYR1,SHARPIN,SLC39A4
TCGA-13-0799-01	GSTT1,RB1,UGT2B17,WWOX
TCGA-13-0800-01	PI4KB,TP53
TCGA-13-0801-01	RFX1
TCGA-13-0804-01	BRCA1,TP53
TCGA-10-0926-01	KRAS,MUC16,PDPR,SOX5,SSPN,STK38L,TP53,TRIP10,UGT2B17,WNK1,WWOX
TCGA-10-0927-01	ATXN10,CALR,DTNA,GCDH,GSTT1,MAP3K1,RFX1,RYR1
TCGA-10-0928-01	EIF4G1,KRAS,LPP,PDPR,SOX5,SSPN,STK38L,VPS8
TCGA-10-0930-01	ATXN10,STK38L,WRN
TCGA-10-0931-01	GSTT1,TP53
TCGA-10-0933-01	EIF4G1,FBXW7,GSTT1,MUC16,MUC4,OGFR,PDE4D,RB1,SORBS2
TCGA-10-0934-01	SMARCA4,TP53,WWOX
TCGA-10-0935-01	OGFR,TP53,WWOX
TCGA-10-0936-01	CCNE1,FAM49B,MYC,POLB,POP4,RFX1,SHARPIN,SLC39A4
TCGA-10-0937-01	FAM49B,MYC,WWOX
TCGA-10-0938-01	CALR,CARM1,GCDH,OGFR,PDPR,RFX1,TNPO2,WNK1
TCGA-13-0807-01	ATXN10,CALR,CCNE1,GCDH,HIC1,PI4KB,PPP2R2A,RFX5,TNKS,TNPO2,TP53,WRN
TCGA-13-0883-01	GSTT1,KRAS,SOX5,TP53,WNK1
TCGA-13-0885-01	BRCA2,DTNA,SYNE1,TP53
TCGA-13-0886-01	TP53
TCGA-13-0887-01	SHARPIN,SNAP23,SORCS3,TP53,VPS39
TCGA-13-0888-01	ALG12,ATXN10,BRD1,MTAP,PPARA,UGT2B17,WWOX
TCGA-13-0889-01	CREBBP
TCGA-13-0890-01	BRCA2,SORBS2,TNIK,TP53
TCGA-13-0891-01	RAB8A,THRAP3,TP53
TCGA-13-0897-01	FAM49B,GSTT1,NDRG1,PDPR,SHARPIN,SLC39A4
TCGA-13-0899-01	SSPN,TP53,WNK1,WWOX
TCGA-13-0903-01	FAM49B,NDRG1,SHARPIN,SLC39A4,TP53,WWOX
TCGA-13-0904-01	HIC1,MUC16,MYO1F,NDRG1,SMARCA4,TP53,TRIP10,UGT2B17
TCGA-13-0906-01	GSTT1
TCGA-13-0910-01	CREBBP,TP53
TCGA-13-0911-01	CD47,GSTT1,TP53
TCGA-13-0912-01	GSTT1,KRAS,PDPR,RAB8A,SOX5,TP53,WNK1
TCGA-13-0913-01	FAM49B,MUC16,MYC,NDRG1,PDPR,SHARPIN,SLC39A4,STK38L,TNKS,TP53,WWOX
TCGA-13-0916-01	FAM49B,MYC,SHARPIN,SLC39A4,TP53
TCGA-13-0919-01	FAM49B,MGAM,PDPR,SHARPIN,SLC39A4
TCGA-13-0920-01	FDFT1,LRP2BP,MGAM,PDE4D,SIGLEC5,SLC25A4,SORBS2,TP53
TCGA-13-0921-01	CALR,CARM1,GCDH,GSTT1,MUC16,MYO1F,RFX1,SMARCA4,TNPO2
TCGA-13-0923-01	CREBBP,GSTT1,RB1,SSPN,STK38L,TP53
TCGA-13-0924-01	GSTT1,MUC16,NF1,TP53
TCGA-24-0966-01	CCNE1,CREBBP,MGAM,NF1,POP4,RAB8A,TP53
TCGA-24-0980-01	FAM49B,NDRG1,RB1,TP53,WWOX
TCGA-13-0913-02	FAM49B,MYC,NDRG1,SHARPIN,SLC39A4,TNKS
TCGA-04-1332-01	RYR1,TP53
TCGA-04-1336-01	LPP,NF1,SLC39A4,TP53,WWOX
TCGA-04-1337-01	WNK1
TCGA-04-1338-01	FAM49B,FXR1,MUC4,SHARPIN,SLC39A4,UGT2B17
TCGA-04-1341-01	ATXN10,GSTT1,MACF1,MGAM,NDUFS5,PTPRF,SIGLEC5,WWOX
TCGA-04-1342-01	CCNE1,GSTT1,KRAS,MGAM,POP4,SSPN
TCGA-04-1343-01	EIF4G1,FXR1,GSTT1,LPP,OGFR,TP53,VPS8,WWOX
TCGA-04-1346-01	CCNE1,GSTT1,POP4,TP53,WWOX
TCGA-04-1347-01	ALG12,ATXN10,BRD1,CPT1B,EIF4G1,FXR1,LPP,PHC3,PRKCI,SOX5,TP53,UGT2B17,VPS8,WWOX
TCGA-20-0987-01	GSTT1,MUC16,TP53,WWOX
TCGA-20-0990-01	CALR,CARM1,CCNE1,FDFT1,GCDH,GSTT1,LPP,MACF1,MGAM,MUC16,MUC4,MYC,MYO1F,NDUFS5,PPP2R2A,SMARCA4,THRAP3,TNKS,TNPO2,TP53,UGT2B17,WWOX
TCGA-20-0991-01	CALR,GCDH,GSTT1,MACF1,NDUFS5,PTPRF,SHARPIN,SLC39A4,THRAP3,TP53,UGT2B17
TCGA-23-1021-01	FAM49B,GSTT1,MYC,TP53,WWOX
TCGA-23-1022-01	ALG12,BRD1,CPT1B,DAP,EIF4G1,FBXW7,FXR1,GSTT1,LRP2BP,MGAM,MUC4,PDPR,RYR1,SHARPIN,SLC25A4,SNAP23,SORBS2,TP53,VPS39,VPS8,WWOX
TCGA-23-1023-01	FAM49B,NDRG1,SHARPIN,UGT2B17
TCGA-23-1024-01	CCNE1,GSTT1,OGFR,POP4,PPP2R2A,RYR1,SMARCA4,TNPO2
TCGA-23-1026-01	FAM49B,GSTT1,MYC,NDRG1,SHARPIN,SLC39A4
TCGA-23-1027-01	FAM49B,GSTT1,MYC,NDRG1,NF1,SHARPIN,SLC39A4,WWOX
TCGA-23-1028-01	HIC1,SHARPIN,SLC39A4
TCGA-23-1030-01	BRCA1,BRCA2,PDPR,RAB8A,TP53,WWOX
TCGA-23-1031-01	GSTT1,MUC16,TP53
TCGA-23-1032-01	CALR,CARM1,EIF4G1,GCDH,GSTT1,TP53
TCGA-23-1107-01	ATXN10,WWOX
TCGA-23-1109-01	CCNE1,POLB,POP4,SLC39A4,WNK1
TCGA-23-1110-01	GSTT1,HIC1,OGFR,SYNE1,TP53,WWOX
TCGA-23-1113-01	MAP3K1,MUC16,MYO1F,WWOX
TCGA-23-1116-01	CCNE1,FAM49B,KRAS,POP4,PRKCI,RYR1,SOX5,SSPN,STK38L,TP53
TCGA-23-1117-01	GSTT1,OGFR,RYR1,TP53,WNK1,WWOX
TCGA-23-1118-01	PDPR,TP53
TCGA-23-1119-01	HIC1
TCGA-23-1120-01	EIF4G1,FXR1,LPP,WWOX
TCGA-23-1121-01	DAP,FAM49B,GSTT1,KRAS,PDE4D,PHC3,POLB,PPP2R2A,PRKCI,SOX5,UGT2B17,WWOX
TCGA-23-1122-01	FBXW7,GSTT1,POP4,TP53
TCGA-23-1123-01	ATXN10,CCNE1,DTNA,MYO1F,PDE4D,POP4,PPP2R2A,SMARCA4,TNPO2,TP53,WWOX
TCGA-23-1124-01	ALG12,BRD1,FDFT1,PPARA,PPP2R2A,PTPRF,TNKS,TP53,WRN
TCGA-24-0968-01	PDPR,SIGLEC5,SSPN,WNK1,WWOX
TCGA-24-0970-01	MYO1F,TP53,UGT2B17
TCGA-24-0975-01	RYR1,SPAM1,WWOX
TCGA-24-0979-01	FAM49B,MYC,NDRG1,PDPR,RYR1,SHARPIN,SLC39A4,TP53
TCGA-24-0982-01	CALR,CARM1,CCNE1,GCDH,GSTT1,MGAM,MUC16,MYO1F,POP4,RAB8A,SIGLEC5,SMARCA4,TNPO2,TP53,WWOX
TCGA-24-1103-01	BRCA2,TP53,UGT2B17
TCGA-24-1104-01	BRCA1,SLC25A4,TP53,WWOX
TCGA-24-1105-01	ABR,FAM49B,GEMIN4,GSTT1,MTAP,NDRG1,SHARPIN,SLC39A4
TCGA-04-1348-01	CALR,GCDH,RAB8A,RFX1,TP53,WWOX
TCGA-04-1349-01	CALR,FAM49B,FDFT1,GCDH,GSTT1,POLB,PPP2R2A,SHARPIN,SLC39A4,TNKS,TP53,WRN,WWOX
TCGA-04-1350-01	TNPO2,UGT2B17,WNK1
TCGA-04-1356-01	KRAS,SOX5,STK38L,WNK1,WWOX
TCGA-04-1357-01	BRCA1,TP53
TCGA-04-1361-01	FAM49B,MYC,NDRG1,SHARPIN,SLC39A4,TP53,UGT2B17,WWOX
TCGA-04-1362-01	EIF4G1,FAM49B,FXR1,LPP,LRP2BP,NDRG1,PDPR,SHARPIN,SLC25A4,SLC39A4,SORBS2,TP53,UGT2B17,VPS8,WWOX
TCGA-04-1364-01	GSTT1,MYO1F,OGFR,TRIP10
TCGA-04-1365-01	NF1,RB1,WWOX
TCGA-04-1367-01	ATXN10,GSTT1,NF1,TP53,UGT2B17,VPS39
TCGA-13-0884-01	SIGLEC5,SLC39A4,SOX5,TP53
TCGA-13-0893-01	FAM49B,MYC,NDRG1,SIGLEC5,TP53,UGT2B17
TCGA-13-0894-01	MGAM,PPARA,TP53,UGT2B17,WWOX
TCGA-13-0900-01	GSTT1,SLC39A4,UGT2B17,WWOX
TCGA-13-0901-01	ALG12,ATXN10,BRD1,CARM1,FAM49B,FDFT1,MAPK1,MYC,PPP2R2A,TNKS,UGT2B17,WRN,WWOX
TCGA-13-0905-01	DAP,RB1,TP53
TCGA-13-0908-01	FAM49B,NDRG1,SHARPIN,SLC39A4
TCGA-13-1403-01	BRD1,MACF1,NDUFS5,TP53
TCGA-13-1404-01	RB1,TP53,WWOX
TCGA-13-1405-01	MAP3K1,NF1,TP53
TCGA-13-1407-01	ALG12,BRD1,GSTT1,RFX1,UGT2B17
TCGA-13-1408-01	GSTT1,WWOX
TCGA-13-1409-01	GSTT1,HIC1,TP53
TCGA-13-1410-01	CALR,CARM1,CCNE1,CREBBP,GCDH,MUC16,RFX1,SMARCA4,TNPO2,TP53,UGT2B17
TCGA-13-1411-01	DTNA,KRAS,SOX5,TP53
TCGA-13-1412-01	GSTT1,TP53,WNK1
TCGA-24-1413-01	NF1,TP53,WWOX
TCGA-25-1312-01	CALR,GCDH,PDE4D,PSENEN,RYR1,TNPO2
TCGA-25-1313-01	MGAM,TP53
TCGA-25-1314-01	ATXN10,FAM49B,MAP3K1,MYC,PDE4D,SHARPIN,SLC39A4
TCGA-25-1315-01	GSTT1,PDPR,PTPRF,TP53
TCGA-25-1316-01	FBXW7,KRAS,UGT2B17
TCGA-25-1317-01	GSTT1,MAP3K1
TCGA-25-1318-01	FAM49B,GSTT1,NDRG1,SHARPIN,SLC39A4,WWOX
TCGA-25-1319-01	ABR,ASPA,CALR,CARM1,CCNE1,FAM49B,FDFT1,GCDH,GEMIN4,GSTT1,MACF1,MYC,PPP2R2A,RYR1,SMARCA4,TNKS,TNPO2,TP53,UGT2B17
TCGA-25-1320-01	CCNE1,GSTT1,KRAS,POP4,TP53
TCGA-25-1321-01	GSTT1,SOX5,TP53,UGT2B17,WNK1
TCGA-25-1322-01	GSTT1,MUC16,PHC3,TP53,WWOX
TCGA-25-1323-01	CARM1,CCNE1,GSTT1,PDE4D,POP4,RAB8A,SMARCA4,TNPO2
TCGA-25-1324-01	POLB,WNK1
TCGA-25-1325-01	FDFT1,GSTT1,MTAP,PPP2R2A,TNKS,WRN
TCGA-25-1326-01	PHC3,PRKCI,SORCS3,TP53,WWOX
TCGA-25-1328-01	DTNA
TCGA-25-1329-01	CCNE1,FAM49B,KRAS,MYC,OGFR,PDPR,PSENEN,RYR1,SHARPIN,SLC39A4,SSPN,STK38L,TP53,UGT2B17,WNK1,WWOX
TCGA-13-1477-01	LIFR
TCGA-13-1481-01	BRCA2,MUC16,TP53
TCGA-13-1482-01	MGAM,RB1,TP53
TCGA-13-1483-01	FAM49B,GSTT1,MYC,NDRG1,NF1,SHARPIN,SLC39A4,TP53
TCGA-13-1484-01	GSTT1,TP53,UGT2B17
TCGA-13-1485-01	GSTT1,MTAP
TCGA-13-1487-01	GSTT1,PPP2R2A,SIGLEC5,SYNE1,TNKS,TP53,WRN,WWOX
TCGA-13-1488-01	CREBBP,GSTT1,TP53
TCGA-13-1489-01	BRCA1,GSTT1,MGAM,RB1,TP53
TCGA-13-1491-01	CARM1,CCNE1,GSTT1,POP4,SIGLEC5,SMARCA4,TNPO2,TP53,UGT2B17
TCGA-13-1492-01	DAP,LIFR,TP53
TCGA-13-1494-01	TP53
TCGA-13-1495-01	KRAS,LPP,PDPR,PI4KB,PRKCI,RFX5,TP53
TCGA-13-1496-01	BRD1,CCNE1,FAM49B,SIGLEC5,TP53,UGT2B17,WWOX
TCGA-13-1497-01	ALG12,BRD1,CREBBP,DAP,EIF4G1,FBXW7,FXR1,KRAS,LPP,LRP2BP,MAP3K1,NF1,PDE4D,PHC3,PRKCI,SIGLEC5,SLC25A4,SNAP23,SORBS2,SORCS3,TNIK,TP53,VPS8
TCGA-13-1498-01	LPP,PHC3,PRKCI,RFX5,SYNE1,TNIK,TP53
TCGA-13-1499-01	TP53
TCGA-13-1500-01	SLC39A4,UGT2B17,WWOX
TCGA-13-1501-01	GSTT1,NDRG1,SF3B4,SHARPIN,SLC39A4,TP53
TCGA-13-1504-01	GSTT1,MGAM,PHC3,SOX5,SSPN,STK38L,TP53
TCGA-13-1505-01	MACF1,NDUFS5,PTPRF,SIGLEC5,SMARCA4,TP53
TCGA-13-1506-01	CALR,CCNE1,DTNA,EIF4G1,GCDH,KRAS,MUC16,MYO1F,PDPR,RAB8A,SSPN,TRIP10,WNK1
TCGA-13-1507-01	GSTT1,MACF1,TP53
TCGA-13-1509-01	CARM1,GSTT1,RB1,SMARCA4,TP53,UGT2B17
TCGA-13-1510-01	TNIK
TCGA-13-1511-01	GSTT1,PHC3,PRKCI
TCGA-13-1512-01	MUC16,TP53
TCGA-24-1416-01	CARM1,GCDH,SMARCA4,TNPO2,TP53
TCGA-24-1417-01	EIF4G1,GSTT1,LPP,PRKCI,TNIK,VPS8
TCGA-24-1418-01	GSTT1,LRP2BP,NF1,RAB8A,SORBS2,TP53,WWOX
TCGA-24-1419-01	TP53,WWOX
TCGA-24-1422-01	MUC16,SORCS3,SOX5,TP53
TCGA-24-1423-01	MGAM,NF1,TP53
TCGA-24-1424-01	ALG12,BRD1,CCNE1,CPT1B,POP4,PPARA,RYR1,TP53
TCGA-24-1426-01	CCNE1,CD47,GSTT1,MYO1F,PDPR,POP4,RAB8A,RYR1,TP53,UGT2B17
TCGA-24-1427-01	FAM49B,GSTT1,MYC,NDRG1,TNIK,TP53,WWOX
TCGA-24-1428-01	EIF4G1,GEMIN4,HIC1,MYC,PPP2R2A,TP53,WRN
TCGA-24-1430-01	GSTT1
TCGA-24-1431-01	ABR,BRCA1,MAP3K1,NF1,PDE4D,POLB,PPP2R2A,THRAP3,TNKS,WRN
TCGA-24-1434-01	CCNE1,TP53,UGT2B17
TCGA-24-1435-01	MUC16,PDPR,SORCS3,TP53,UGT2B17
TCGA-24-1436-01	GSTT1,MUC4,NDRG1,PDE4D,SHARPIN,SLC39A4,TP53,WWOX
TCGA-24-1463-01	NF1,PDPR,RB1,TP53,WNK1
TCGA-24-1464-01	FAM49B,GSTT1,NF1,TP53
TCGA-24-1466-01	MAP3K1,NDRG1,PDE4D,TP53,VPS8
TCGA-24-1467-01	FOXK2,MYC,SLC39A4
TCGA-13-1489-02	GSTT1
TCGA-04-1514-01	ALG12,ATXN10,BRD1,CPT1B,EIF4G1,FOXK2,FXR1,GSTT1,LPP,MAPK1,MUC4,PPARA,VPS8,WNK1
TCGA-04-1530-01	WWOX
TCGA-04-1542-01	CCNE1,GSTT1,MUC16,POP4,RFX1,SIGLEC5,SMARCA4,TP53
TCGA-24-1425-01	TP53
TCGA-24-1469-01	DAP,EIF4G1,MGAM,PDE4D,RB1,TP53,UGT2B17
TCGA-24-1470-01	CPT1B,GSTT1,NF1,TP53
TCGA-24-1471-01	GSTT1,PRKCI,TNIK,TP53,VPS39
TCGA-24-1474-01	CALR,FAM49B,GCDH,GSTT1,MYC,NDRG1,PPP2R2A,RB1,RFX1,SMARCA4,TNPO2,TP53
TCGA-24-1549-01	CALR,EIF4G1,GCDH,GSTT1,LPP,MUC16,NF1,PSENEN,RAB8A,RB1,TNPO2,VPS8
TCGA-24-1550-01	FXR1,MUC4,WWOX
TCGA-24-1551-01	PDPR,PHC3,PRKCI,TP53
TCGA-24-1552-01	CCNE1,CD47,GSTT1,POLB,POP4,PPP2R2A,PSENEN,PTPRF,RYR1,SLC39A4,TP53,WWOX
TCGA-24-1553-01	CD47,GSTT1
TCGA-24-1562-01	NF1,TNPO2,TP53
TCGA-24-1563-01	MYC,PDPR,SHARPIN,SLC39A4,TP53
TCGA-24-1564-01	TP53,UGT2B17
TCGA-24-1565-01	FBXW7,WWOX
TCGA-24-1603-01	GSTT1,NF1,RB1,TP53
TCGA-24-1604-01	FAM49B,GSTT1,MAP3K1,MYC,PDE4D,SLC39A4,TNKS
TCGA-24-1614-01	BRD1,CCNE1,CPT1B,GSTT1,POP4,PSENEN
TCGA-24-1616-01	CALR,CARM1,DAP,GCDH,GSTT1,MACF1,MAP3K1,NDUFS5,PDE4D,PTPRF,RFX1,SMARCA4,THRAP3,TNPO2,TP53,UGT2B17,WWOX
TCGA-04-1517-01	BRD1
TCGA-04-1519-01	RAB8A
TCGA-04-1525-01	CALR,CARM1,CCNE1,GSTT1,POP4,SMARCA4,WWOX
TCGA-04-1536-01	ATXN10,FBXW7,MAP3K1,PPP2R2A,RB1,SSPN,STK38L,UGT2B17,WNK1
TCGA-09-1659-01	CCNE1,NF1,POP4
TCGA-09-1661-01	KRAS,MGAM,PDPR,SOX5,SSPN,WNK1
TCGA-09-1662-01	DAP,UGT2B17
TCGA-09-1665-01	DAP,FAM49B,GSTT1,NDRG1,PPP2R2A,WWOX
TCGA-09-1666-01	DAP
TCGA-09-1667-01	ALG12,ATXN10,BRD1,CALR,CCNE1,FAM49B,GCDH,KRAS,MYC,NDRG1,PI4KB,POP4,PPARA,RAB8A,RFX1,RFX5,SF3B4,SSPN,TNPO2,WWOX
TCGA-09-1668-01	FAM49B,GSTT1,MYC,NDRG1,RB1,SHARPIN,UGT2B17,WWOX
TCGA-09-1669-01	FAM49B,MYC,NDRG1,NF1,PDPR,RB1
TCGA-24-1544-01	CCNE1,FDFT1,FOXK2,LIFR,OGFR,POP4,PPP2R2A,PSENEN,RYR1,WRN
TCGA-24-1545-01	GSTT1
TCGA-24-1546-01	MTAP
TCGA-24-1548-01	CARM1,CCNE1,MAP3K1,PDE4D,POP4,PSENEN,RYR1,SSPN
TCGA-24-1556-01	ATXN10,GSTT1,MGAM,RB1,UGT2B17
TCGA-24-1557-01	EIF4G1,FAM49B,MYC,NDRG1,OGFR,RB1,SHARPIN
TCGA-24-1558-01	ALG12,ATXN10,BRCA2,BRD1,CCNE1,CPT1B,CREBBP,GSTT1,PDE4D,PDPR,POP4,PPARA,PPP2R2A,RB1,RFX1,RYR1,TNPO2,WRN
TCGA-24-1560-01	ATXN10,CREBBP,GSTT1,MAPK1,PDPR
TCGA-24-1567-01	PDE4D
TCGA-25-1623-01	MYC,WWOX
TCGA-25-1625-01	MGAM,SHARPIN
TCGA-25-1626-01	GSTT1
TCGA-25-1627-01	KRAS,MACF1,NDUFS5,POLB,SIGLEC5,SOX5,SSPN,STK38L,WNK1,WWOX
TCGA-25-1628-01	MAPK1
TCGA-25-1630-01	CD47
TCGA-25-1631-01	CCNE1,GSTT1,POP4
TCGA-25-1632-01	ABR,ASPA,GEMIN4,GSTT1,NF1,PPP2R2A
TCGA-25-1633-01	GSTT1,MACF1,NDUFS5
TCGA-25-1634-01	SLC25A4,UGT2B17,WNK1
TCGA-25-1635-01	CCNE1,KRAS,POP4,PSENEN,RYR1,SOX5,SSPN,STK38L,WWOX
TCGA-36-1568-01	FAM49B,MYC,NDRG1,NF1,PDPR,SHARPIN,SLC39A4
TCGA-36-1569-01	WWOX
TCGA-36-1570-01	MUC16,SIGLEC5,TNPO2,WWOX
TCGA-36-1571-01	KRAS,MTO1,RAB8A,SOX5,SSPN,STK38L,WNK1,WWOX
TCGA-36-1574-01	FAM49B,GSTT1,MYC,NDRG1,RB1,SIGLEC5,UGT2B17
TCGA-36-1575-01	CARM1,PPP2R2A,RFX1,SIGLEC5,SMARCA4,WRN,WWOX
TCGA-36-1576-01	CCNE1,POP4
TCGA-36-1577-01	MACF1,MUC4,NDUFS5,PDPR,PTPRF,THRAP3,UGT2B17
TCGA-36-1578-01	ATXN10,DTNA,FBXW7,PDE4D,PDPR,SIGLEC5,SORBS2,TNKS
TCGA-36-1580-01	GSTT1,MACF1,NDUFS5
TCGA-36-1581-01	CCNE1,POP4,UGT2B17
TCGA-57-1582-01	FAM49B,MYC,NDRG1,PDPR,SHARPIN,SLC39A4,UGT2B17,WNK1
TCGA-57-1583-01	ALG12,ATXN10,BRD1,CCNE1,CPT1B,FAM49B,FDFT1,GSTT1,MYC,POP4,PPARA,PPP2R2A,RAB8A,RYR1,SIGLEC5,TNKS,WRN
TCGA-57-1584-01	FAM49B,GSTT1,MYC,NDRG1,NF1
TCGA-57-1585-01	GSTT1,NDRG1,SHARPIN,SLC39A4,UGT2B17,WNK1,WWOX
TCGA-04-1655-01	BRD1,TP53,UGT2B17,WWOX
TCGA-09-1670-01	GSTT1,NF1,TP53,WWOX
TCGA-09-1672-01	KRAS
TCGA-09-1673-01	CCNE1,EIF4G1,FXR1,MYC,PHC3,RAB8A,TP53,VPS8
TCGA-09-1674-01	ALG12,BRD1,CPT1B,LPP,PPARA,PSENEN,RB1,TP53
TCGA-09-1675-01	TP53
TCGA-20-1682-01	DAP,FAM49B,MGAM,NDRG1,SHARPIN,SLC39A4,TP53,UGT2B17
TCGA-20-1683-01	CCNE1,CREBBP,FAM49B,GSTT1,MYC,NDRG1,TP53
TCGA-20-1684-01	ALG12,BRD1,CCNE1,CPT1B,FAM49B,FXR1,MACF1,MYC,POP4,PRKCI,RAB8A,TNIK,WWOX
TCGA-20-1685-01	DTNA,LRP2BP,RAB8A,SLC25A4,SORBS2,TNKS,TP53
TCGA-20-1686-01	ATXN10,BRD1,CALR,CARM1,GCDH,GEMIN4,MAP3K1,PPP2R2A,RAB8A,RFX1,SMARCA4,TNKS,TNPO2,TP53,UGT2B17,WRN
TCGA-20-1687-01	ATXN10,BRD1,PDPR,PPARA,SHARPIN,SLC39A4,TP53,UGT2B17
TCGA-23-1114-01	BRD1,KRAS,PPARA,RB1,SOX5,SSPN,STK38L,TP53
TCGA-23-1809-01	CD47,FDFT1,FOXK2,GSTT1,MAPK1,RB1,TNKS,WWOX
TCGA-24-1847-01	BRCA1,SLC39A4,TP53
TCGA-29-1688-01	SHARPIN,SLC39A4,TP53
TCGA-29-1690-01	WWOX
TCGA-29-1691-01	ALG12,BRD1,CPT1B,FXR1,GSTT1,MGAM,MUC16,PI4KB,PRKCI,RB1,SNAP23,SORCS3,SYNE1,TNIK,TP53,UGT2B17,VPS39,WWOX
TCGA-29-1693-01	BRCA2,FAM49B,FXR1,LPP,MYC,NDRG1,PRKCI,SHARPIN,SLC39A4,VPS8,WWOX
TCGA-29-1694-01	FAM49B,GSTT1,MGAM,NF1
TCGA-29-1695-01	CALR,CCNE1,GCDH,POP4,PRKCI,PSENEN,TNPO2,TP53,WNK1
TCGA-29-1696-01	GSTT1,KRAS,TP53,WWOX
TCGA-29-1697-01	GSTT1,TP53
TCGA-29-1698-01	ATXN10,CCNE1,EIF4G1,MACF1,NDUFS5,POP4,PTPRF,TP53
TCGA-29-1699-01	CREBBP,GSTT1,RAB8A,RYR1,SORBS2,SSPN,TP53
TCGA-29-1701-01	CCNE1,FAM49B,MYC,NDRG1,POP4,RYR1,TP53,UGT2B17
TCGA-29-1702-01	ABR,ALG12,BRD1,CPT1B,FAM49B,FDFT1,GEMIN4,GSTT1,MACF1,MYC,NDUFS5,POLB,PPARA,PPP2R2A,SNAP23,THRAP3,TNKS,TP53,WRN
TCGA-29-1703-01	ALG12,BRD1,CCNE1,CPT1B,CREBBP,FAM49B,FDFT1,MYC,NDRG1,NF1,POP4,PPP2R2A,RB1,SHARPIN,SSPN,STK38L,TNKS,TP53,WRN,WWOX
TCGA-29-1705-01	CREBBP,FAM49B,MTAP,MYC,NDRG1,PDE4D,SHARPIN,SLC39A4,TP53,WWOX
TCGA-29-1707-01	MUC16,OGFR,TP53
TCGA-29-1710-01	CCNE1,POP4,PSENEN,RFX1,TP53,UGT2B17,WWOX
TCGA-29-1711-01	GSTT1,OGFR,TP53
TCGA-29-1761-01	CCNE1,FAM49B,GSTT1,KRAS,LRP2BP,MYC,POP4,SOX5,SSPN,STK38L,SYNE1,TP53,WNK1
TCGA-29-1762-01	BRCA2,RB1,TP53,WWOX
TCGA-29-1763-01	CPT1B,DTNA,TP53,WWOX
TCGA-29-1764-01	FBXW7,TP53,WWOX
TCGA-29-1766-01	CCNE1,DTNA,GSTT1,TP53
TCGA-29-1768-01	BRCA1,GSTT1,SNAP23,TP53
TCGA-29-1770-01	DAP,FAM49B,GSTT1,MYC,NDRG1,SHARPIN,SLC39A4,TP53,WWOX
TCGA-29-1771-01	NF1,TP53,WWOX
TCGA-29-1781-01	GSTT1,MACF1,TP53
TCGA-29-1783-01	CALR,CARM1,GCDH,GSTT1,MUC16,MYO1F,PPP2R2A,SIGLEC5,SMARCA4,TNPO2,TP53,WWOX
TCGA-29-1784-01	PPP2R2A,RYR1,SORBS2,TP53,WRN,WWOX
TCGA-29-1785-01	NF1,SHARPIN,SLC25A4,TP53
TCGA-30-1714-01	ALG12,ATXN10,BRCA1,BRD1,CCNE1,CPT1B,NF1,POP4,PPARA,PSENEN,RYR1,SIGLEC5,TP53
TCGA-30-1718-01	SYNE1,TP53
TCGA-57-1586-01	MACF1,NDUFS5,PI4KB,PTPRF,RFX5,SF3B4,WWOX
TCGA-29-1705-02	MTAP,MYC
TCGA-29-1707-02	SORBS2
TCGA-29-1710-02	CCNE1,MYC,POP4,PSENEN,RFX1,UGT2B17,WNK1,WWOX
TCGA-29-1770-02	FAM49B,GSTT1,MYC,NDRG1,SHARPIN,SLC39A4,SYNE1
TCGA-04-1638-01	GSTT1,MACF1,RB1,WWOX
TCGA-04-1646-01	MUC16,OGFR,TP53
TCGA-04-1648-01	FOXK2,NF1,TP53
TCGA-04-1649-01	FBXW7,PPP2R2A,SYNE1,TP53,WRN
TCGA-04-1651-01	RB1,TP53,UGT2B17
TCGA-04-1652-01	CCNE1,FDFT1,GSTT1,PPP2R2A,SLC39A4,SOX5,TNKS,TP53,WRN,WWOX
TCGA-09-1664-01	KRAS,NF1
TCGA-23-1029-01	FAM49B,GSTT1,MYC,NDRG1,SHARPIN,SLC39A4,TP53
TCGA-23-1111-01	CALR,GCDH,RFX1,SMARCA4,TNPO2,TP53,WWOX
TCGA-24-1842-01	GSTT1,PHC3,PPP2R2A,PRKCI,TNIK,TNKS,TP53,WRN,WWOX
TCGA-24-1843-01	CCNE1,GSTT1,POP4,PPP2R2A,RYR1,SPAM1,TNPO2,TP53,WWOX
TCGA-24-1844-01	CALR,GCDH,GSTT1,PDPR,SIGLEC5,SNAP23,TNPO2,TP53,VPS39,WWOX
TCGA-24-1845-01	ASPA,GSTT1,LRP2BP,MAPK1,MUC16,SLC25A4,SNAP23,SORBS2,TP53,TRIP10,VPS39
TCGA-24-1846-01	BRCA1,MUC4,TP53
TCGA-24-1849-01	RB1,TP53
TCGA-24-1850-01	CD47,PRKCI,PSENEN,TP53,WWOX
TCGA-29-1769-01	CD47,GSTT1,KRAS,PRKCI,SORCS3,SOX5,SSPN,TNIK,WWOX
TCGA-29-1774-01	DAP
TCGA-29-1775-01	FOXK2,MTAP,RAB8A,TP53
TCGA-29-1776-01	BRCA1,NF1,TP53,WWOX
TCGA-29-1777-01	CARM1,SOX5
TCGA-29-1778-01	ALG12,ATXN10,BRD1,CALR,CARM1,CPT1B,GCDH,PPARA,RAB8A,RFX1,SMARCA4,TNPO2,TP53,UGT2B17,WWOX
TCGA-30-1855-01	MACF1,TP53
TCGA-30-1856-01	CALR,GCDH,SPAM1
TCGA-30-1857-01	BRCA1,FAM49B,FXR1,NDRG1,PHC3,PRKCI,SHARPIN,SLC39A4,TP53
TCGA-61-1722-01	MUC4,TNIK,TP53
TCGA-61-1725-01	FAM49B,MYC,NDRG1,SHARPIN,SLC39A4,TP53
TCGA-61-1727-01	TP53
TCGA-61-1730-01	MACF1,TP53
TCGA-61-1733-01	CCNE1,CD47,EIF4G1,GSTT1,LPP,POP4,PRKCI,PSENEN,RYR1,TNIK,TP53,VPS8
TCGA-61-1737-01	RB1,SYNE1,TP53,WWOX
TCGA-61-1738-01	CCNE1,MAP3K1,PI4KB,POP4,RFX5,TP53
TCGA-61-1740-01	CREBBP,FAM49B,NDRG1,NF1,PDE4D,PI4KB,RB1,SHARPIN,TP53,UGT2B17,WWOX
TCGA-61-1741-01	CCNE1,EIF4G1,FXR1,GSTT1,LPP,MUC4,POP4,PRKCI,PSENEN,RYR1,TNIK,TP53,VPS39,VPS8
TCGA-61-1895-01	NF1,SF3B4,TP53
TCGA-61-1899-01	CCNE1,GSTT1,KRAS,PI4KB,POP4,RFX5,SF3B4,SSPN
TCGA-61-1900-01	EIF4G1,GSTT1,LPP,MACF1,MTAP,PHC3,PRKCI,TP53,VPS8,WNK1,WWOX
TCGA-61-1901-01	TP53,UGT2B17
TCGA-61-1903-01	BRCA2,TP53
TCGA-61-1904-01	CALR,CARM1,CCNE1,GCDH,MUC16,MYC,POP4,PPP2R2A,RAB8A,RFX1,SHARPIN,SLC39A4,TNKS,TP53
TCGA-61-1906-01	ABR,FAM49B,MGAM,SHARPIN,SLC39A4,TNKS,TP53
TCGA-61-1907-01	BRCA2,FAM49B,KRAS,MYC,PPP2R2A,SHARPIN,SLC39A4,SSPN,STK38L,UGT2B17,WNK1,WRN
TCGA-61-1910-01	FAM49B,FXR1,GCDH,GSTT1,MGAM,MYC,NDRG1,SHARPIN,SOX5,TP53,WWOX
TCGA-61-1911-01	EIF4G1,GSTT1,PRKCI,TP53,VPS8,WWOX
TCGA-61-1913-01	FOXK2,MYC,NDRG1,SHARPIN,SLC39A4,TP53
TCGA-61-1914-01	BRCA1,CARM1,FAM49B,GSTT1,SHARPIN,SLC39A4,TP53,UGT2B17
TCGA-61-1915-01	ATXN10,MACF1,MAPK1,NDUFS5,PPP2R2A,PTPRF,TNKS,TP53,WRN,WWOX
TCGA-04-1654-01	FAM49B,NDRG1,SHARPIN,SLC39A4,WNK1,WWOX
TCGA-24-1920-01	CALR,CARM1,EIF4G1,FAM49B,FXR1,GCDH,GSTT1,MAP3K1,MYC,PDE4D,PHC3,PRKCI,RB1,SMARCA4,SYNE1,TNIK,TNPO2,WWOX
TCGA-24-1923-01	WWOX
TCGA-24-1924-01	GSTT1,MAP3K1,WWOX
TCGA-24-1928-01	FAM49B,GSTT1,MYC,PPP2R2A,WWOX
TCGA-24-1930-01	WWOX
TCGA-24-2020-01	CCNE1,EIF4G1,LIFR,LPP,PHC3,POP4,RB1,TNIK,VPS8,WWOX
TCGA-24-2023-01	MUC4,PHC3,PI4KB,PRKCI,SHARPIN,SLC39A4,WWOX
TCGA-24-2026-01	LIFR,PI4KB,WWOX
TCGA-24-2027-01	GSTT1,PRKCI,RB1,TNKS,WWOX
TCGA-25-1870-01	KRAS,PSENEN,RAB8A,SOX5,WWOX
TCGA-25-1871-01	ALG12,ATXN10,BRD1,CPT1B,PPARA,SIGLEC5
TCGA-25-1877-01	CCNE1,GSTT1,PHC3,POP4,PSENEN,VPS8
TCGA-25-1878-01	DAP,LIFR
TCGA-30-1853-01	ATXN10,BRCA1,BRD1,MUC16,MYC,RFX1,SHARPIN,SLC39A4,SYNE1,TP53
TCGA-30-1859-01	ABR,ASPA,GEMIN4,GSTT1,SIGLEC5
TCGA-30-1860-01	GSTT1,PHC3,PRKCI,RB1,TNIK
TCGA-30-1861-01	GSTT1,MGAM,SLC39A4
TCGA-30-1862-01	GEMIN4,SIGLEC5
TCGA-30-1866-01	CALR,GCDH,GEMIN4,LRP2BP,RAB8A,RFX1,SLC25A4,SORBS2,TNPO2
TCGA-30-1867-01	GSTT1,OGFR
TCGA-30-1887-01	RYR1
TCGA-30-1891-01	FAM49B,MYC,NDRG1
TCGA-30-1892-01	NDRG1,SHARPIN,SLC39A4
TCGA-31-1944-01	GSTT1,SIGLEC5
TCGA-31-1946-01	MGAM
TCGA-31-1950-01	CREBBP,TP53
TCGA-31-1951-01	CALR,CARM1,GCDH,RAB8A,SMARCA4,TNPO2,WWOX
TCGA-31-1953-01	GSTT1,WWOX
TCGA-31-1956-01	GSTT1
TCGA-31-1959-01	BRCA1,GSTT1,LPP,SLC39A4,STK38L,WWOX
TCGA-57-1993-01	CALR,CCNE1,GCDH,GSTT1,KRAS,POP4,RFX1,RYR1,SSPN,TNPO2,TP53
TCGA-57-1994-01	CCNE1,PI4KB,POP4,PSENEN,RFX5,SNAP23,VPS39
TCGA-61-1724-01	EIF4G1,FAM49B,FXR1,GSTT1,LPP,MACF1,NDUFS5,VPS8,WWOX
TCGA-61-1728-01	CCNE1,DAP,POLB,POP4,SIGLEC5,TP53
TCGA-61-1743-01	ALG12,BRD1,CPT1B,SHARPIN,SIGLEC5,SLC39A4,WWOX
TCGA-61-1917-01	GSTT1,MUC16,PDE4D,PHC3,TNKS,WWOX
TCGA-61-1918-01	ALG12,ATXN10,FXR1,GSTT1,LPP,MACF1,NDUFS5,PHC3,PI4KB,PPARA,PRKCI,RFX5,SF3B4,THRAP3,TNIK,VPS8
TCGA-61-1919-01	CCNE1,GSTT1,SLC39A4,WWOX
TCGA-09-2053-01	NF1,TP53
TCGA-09-2054-01	BRCA1,CALR,CARM1,GCDH,MYO1F,RAB8A,SMARCA4,TNPO2,UGT2B17
TCGA-09-2056-01	GSTT1,KRAS,PI4KB,RFX5,SSPN,UGT2B17
TCGA-23-2072-01	MUC4,NF1,TP53
TCGA-23-2077-01	GSTT1,PPP2R2A,TNKS,TP53,UGT2B17,WRN,WWOX
TCGA-23-2078-01	NF1,TP53
TCGA-23-2079-01	EIF4G1,LPP,MACF1,MGAM,NDUFS5,PRKCI,PTPRF,RB1,THRAP3,TNIK,VPS8,WWOX
TCGA-23-2081-01	MTAP,SLC39A4,TP53,WWOX
TCGA-23-2084-01	FAM49B,GSTT1,MYC,TP53
TCGA-24-2019-01	CCNE1,PDPR,POP4,TP53
TCGA-24-2024-01	MUC16,TP53
TCGA-24-2030-01	ALG12,ATXN10,BRD1,DTNA,FAM49B,GSTT1,MAP3K1,NDRG1,POLB,RAB8A,SORCS3,TP53,WWOX
TCGA-24-2033-01	ATXN10,GSTT1,UGT2B17
TCGA-24-2035-01	BRCA1,MACF1,MUC16,WWOX
TCGA-24-2036-01	GSTT1
TCGA-24-2038-01	KRAS
TCGA-24-2254-01	GSTT1,LIFR,SIGLEC5,TP53,UGT2B17
TCGA-24-2260-01	GCDH,MTAP,NDRG1,OGFR,SMARCA4,TNPO2,TP53,WWOX
TCGA-24-2261-01	CCNE1,PSENEN,RB1,RYR1,SORBS2,TNKS,TP53,WWOX
TCGA-61-1736-01	SOX5,TP53
TCGA-61-1995-01	RB1,TP53,WWOX
TCGA-61-1998-01	EIF4G1,MUC4,SLC39A4,TP53,TRIP10
TCGA-61-2000-01	FAM49B,MGAM,MYC,NDRG1,NF1,PHC3,RAB8A,SHARPIN,SLC39A4,TP53,UGT2B17
TCGA-61-2002-01	GSTT1,TP53
TCGA-61-2003-01	CCNE1,GSTT1,POP4,TP53
TCGA-61-2008-01	FAM49B,FBXW7,MYC,NDRG1,SHARPIN,SYNE1,TP53,UGT2B17,VPS39
TCGA-61-2009-01	MUC4,TP53,VPS8,WWOX
TCGA-61-2012-01	CCNE1,DAP,LIFR,POP4,TP53
TCGA-61-2016-01	RB1,TP53,VPS8,WWOX
TCGA-61-2088-01	ALG12,ATXN10,DTNA,KRAS,MAPK1,PPARA,SOX5,SSPN,WWOX
TCGA-61-2092-01	GSTT1,MACF1,MYC,TP53,UGT2B17
TCGA-61-2094-01	TP53
TCGA-61-2095-01	GSTT1,MTAP
TCGA-61-2097-01	BRCA2,SHARPIN,SLC39A4,TNKS,TP53
TCGA-61-2098-01	ATXN10,GSTT1,MAP3K1,MTAP,PDE4D,WWOX
TCGA-61-2101-01	ATXN10,PDE4D,PPP2R2A,TNKS,TP53,WRN,WWOX
TCGA-61-2102-01	ASPA,CARM1,KRAS,NF1,RAB8A,SMARCA4,SOX5,SSPN,STK38L,TNPO2,TP53,WNK1,WRN,WWOX
TCGA-61-2104-01	FBXW7,GSTT1,PPP2R2A,SORBS2,TNKS,TP53,WRN
TCGA-61-2109-01	MAPK1
TCGA-61-2110-01	NF1,TP53
TCGA-61-2111-01	KRAS,MACF1,NDUFS5,SSPN,TP53
TCGA-61-2113-01	CCNE1,FDFT1,GSTT1,KRAS,PPP2R2A,RYR1,SPAM1,TNKS,TP53
TCGA-61-2008-02	RB1,SNAP23,UGT2B17,VPS39
TCGA-61-2095-02	GSTT1,MTAP
TCGA-09-2044-01	TP53,UGT2B17,WNK1,WWOX
TCGA-09-2045-01	TP53,UGT2B17
TCGA-09-2048-01	WNK1
TCGA-09-2049-01	ALG12,ATXN10,BRD1,PDPR,PI4KB,RFX5,SF3B4,TP53,WNK1,WWOX
TCGA-09-2050-01	BRCA2,PSENEN,TP53
TCGA-09-2051-01	FDFT1
TCGA-13-2060-01	CCNE1,MACF1,POP4,THRAP3,TP53
TCGA-24-2262-01	PI4KB,TP53
TCGA-24-2267-01	PPP2R2A,SOX5,TP53,VPS8
TCGA-24-2271-01	GSTT1,TP53,UGT2B17
TCGA-24-2281-01	MACF1,NDUFS5,TP53
TCGA-24-2288-01	TP53
TCGA-24-2289-01	FAM49B,GSTT1,MYC,NDRG1,TP53
TCGA-24-2290-01	TP53,UGT2B17
TCGA-24-2293-01	MUC16,THRAP3
TCGA-24-2297-01	NF1,PDE4D
TCGA-24-2298-01	DAP,WNK1
TCGA-25-2042-01	WRN
TCGA-25-2391-01	NF1,RB1
TCGA-25-2392-01	ATXN10,MTAP,TP53,UGT2B17
TCGA-25-2393-01	ATXN10,KRAS,MACF1,PDE4D,POLB,TNKS,WRN
TCGA-25-2396-01	CALR,CARM1,CCNE1,GCDH,MAP3K1,PDE4D,POP4,RAB8A,RFX1,SMARCA4,TNPO2,TP53,WWOX
TCGA-25-2397-01	FAM49B,GSTT1,MYC,NDRG1,SHARPIN,SLC39A4
TCGA-25-2398-01	DAP,FAM49B,MYC
TCGA-25-2399-01	CALR,GCDH,MUC16,NF1,RYR1,THRAP3,TNPO2,TP53
TCGA-25-2400-01	ALG12,ATXN10,BRD1,CPT1B,GEMIN4,GSTT1,MACF1,NDUFS5,PPARA,RAB8A,THRAP3,TP53
TCGA-25-2401-01	BRCA2,MTAP,TP53,WNK1
TCGA-25-2404-01	PTPRF,TP53
TCGA-25-2408-01	UGT2B17
TCGA-25-2409-01	CARM1,GCDH,MUC16,MYO1F,NF1,RFX1,SMARCA4,TNPO2,TP53,WWOX
TCGA-29-2414-01	BRCA2,FDFT1,SIGLEC5,TNKS
TCGA-29-2425-01	ATXN10,FAM49B,LRP2BP,MYC,NDRG1,SHARPIN,SLC25A4,SLC39A4,SORBS2
TCGA-29-2427-01	BRCA1,GSTT1,RB1,SYNE1,TP53
TCGA-29-2428-01	STK38L
TCGA-59-2348-01	TP53
TCGA-59-2350-01	TP53
TCGA-59-2351-01	MUC16,RYR1,TP53
TCGA-59-2352-01	ABR,GEMIN4,GSTT1,KRAS,MACF1,NDUFS5,PPP2R2A,SOX5,SSPN,STK38L,TNKS,TP53,WRN,WWOX
TCGA-59-2354-01	NF1,TNKS
TCGA-59-2355-01	MACF1,NDUFS5,THRAP3,TP53
TCGA-59-2363-01	FAM49B,MYC,NDRG1,NF1,SYNE1,TP53,UGT2B17,VPS8
TCGA-29-2414-02	ATXN10,BRCA2,PPARA,SIGLEC5,TNKS
TCGA-04-1353-01	CALR
TCGA-04-1369-01	TP53
TCGA-04-1516-01	TP53
TCGA-04-1644-01	TP53
TCGA-13-2057-01	TP53
TCGA-13-2059-01	TP53
TCGA-13-2061-01	SYNE1,TP53
TCGA-13-2065-01	SF3B4
TCGA-13-2066-01	TP53
TCGA-13-2071-01	PI4KB,TP53
TCGA-23-2641-01	TP53
TCGA-23-2643-01	TP53
TCGA-23-2645-01	SHARPIN
TCGA-23-2647-01	SYNE1
TCGA-23-2649-01	TP53
TCGA-29-2429-01	EIF4G1
TCGA-29-2432-01	OGFR,TP53
TCGA-29-2434-01	EIF4G1,TP53
TCGA-29-2436-01	SORCS3
TCGA-36-2530-01	GEMIN4
TCGA-36-2532-01	TP53
TCGA-36-2533-01	RFX1,TP53
TCGA-36-2534-01	BRCA1,NF1,TP53
TCGA-36-2537-01	TP53
TCGA-36-2538-01	RB1,TP53
TCGA-36-2539-01	FBXW7,TP53
TCGA-36-2540-01	SPAM1
TCGA-36-2542-01	CPT1B,TP53
TCGA-36-2543-01	NF1,PTPRF,TP53
TCGA-36-2544-01	CPT1B
TCGA-36-2545-01	BRD1
TCGA-36-2547-01	MACF1
TCGA-36-2548-01	TP53
TCGA-36-2551-01	TP53
TCGA-36-2552-01	TP53
TCGA-42-2582-01	TP53
TCGA-42-2587-01	TP53
TCGA-42-2589-01	TP53
TCGA-42-2590-01	POLB
TCGA-42-2591-01	BRCA1,LRP2BP,TP53
TCGA-59-2372-01	SPAM1,TP53
TCGA-61-2612-01	MUC4,TP53
TCGA-61-2613-01	NF1,TP53
TCGA-61-2614-01	TP53
TCGA-61-2610-02	MUC4
TCGA-61-2611-02	TP53
