# Supplementary material for: HIT'nDRIVE: patient-specific multidriver gene prioritization for precision oncology
Source: HighWire-hosted journal article supplement (doi:10.1101/gr.221218.117), 2017-07-18
Supplement: Supplemental_Table_S7.xlsx [file Supplemental_Table_S7.xlsx]

## Sheet: Supplemental_Table_S7
Supplemental Table S7. Patient Specific Driver Genes of TCGA-PRAD.
TCGA.Sample.ID	Genes
TCGA-CH-5737-01	ATM,BRAF,FOXA1,PTEN,SPECC1L
TCGA-CH-5738-01	DNAH9,NSD1,STEAP1B,ZMYM3
TCGA-CH-5739-01	SYNE1
TCGA-CH-5740-01	ERG,MUC4,NSD1,PTEN,SYNE1
TCGA-CH-5741-01	HTR7,PTEN,ZMYM3
TCGA-CH-5743-01	NSD1,SIRPB1
TCGA-CH-5744-01	SIRPB1
TCGA-CH-5745-01	MUC4,NKX3-1
TCGA-CH-5746-01	SIRPB1
TCGA-CH-5748-01	MED12,SGK1,SPECC1L
TCGA-CH-5750-01	NRG3,POLR2D
TCGA-CH-5751-01	NSD1,SIRPB1
TCGA-CH-5752-01	CDKN1B,NRG3,RYR1
TCGA-CH-5753-01	ACAN
TCGA-CH-5754-01	STEAP1B
TCGA-CH-5761-01	TP53
TCGA-CH-5762-01	ATM,NRG3,STEAP1B
TCGA-CH-5763-01	NSD1
TCGA-CH-5764-01	STEAP1B
TCGA-CH-5765-01	SIRPB1
TCGA-CH-5766-01	NSD1,SYNE1
TCGA-CH-5768-01	MUC4
TCGA-CH-5769-01	DNAH9,PTEN
TCGA-CH-5771-01	NSD1
TCGA-CH-5772-01	IDH1,NRG3,NSD1,ST6GAL2,ZMYM3
TCGA-CH-5788-01	KIAA1217,SPOP
TCGA-CH-5789-01	NSD1
TCGA-CH-5790-01	NSD1
TCGA-CH-5791-01	PTEN,SIRPB1,STEAP1B
TCGA-CH-5792-01	KIAA1217
TCGA-CH-5794-01	NKX3-1,PTEN
TCGA-EJ-5494-01	FOXA1,STEAP1B
TCGA-EJ-5495-01	NBPF1,SPECC1L,STEAP1B
TCGA-EJ-5496-01	NSD1,SPECC1L,WWOX
TCGA-EJ-5497-01	SYNE1
TCGA-EJ-5498-01	MUC4,OBSCN,SIRPB1,SPECC1L
TCGA-EJ-5499-01	ERG,NSD1,PTEN,STEAP1B
TCGA-EJ-5501-01	SPECC1L,STEAP1B
TCGA-EJ-5502-01	SIRPB1,SPECC1L
TCGA-EJ-5503-01	SIRPB1,SPECC1L
TCGA-EJ-5504-01	MUC4,SIRPB1,SPECC1L
TCGA-EJ-5505-01	BRAF,MUC4,NSD1,SPECC1L,SPOP
TCGA-EJ-5506-01	ERG,GUCY1B3,NSD1,OBSCN,SIRPB1,SPECC1L
TCGA-EJ-5507-01	ATM,NSD1,PTEN,SIRPB1,STEAP1B,TP53
TCGA-EJ-5508-01	NSD1,STEAP1B
TCGA-EJ-5509-01	SPOP,ST6GAL2,STEAP1B
TCGA-EJ-5510-01	MED12,SPECC1L
TCGA-EJ-5511-01	ATM,NSD1
TCGA-EJ-5512-01	SPECC1L
TCGA-EJ-5514-01	NSD1,PTEN,SPECC1L,STEAP1B,TP53
TCGA-EJ-5515-01	BCLAF1,SGK1
TCGA-EJ-5516-01	PTEN,SYNE1
TCGA-EJ-5517-01	KIAA1217,NKX3-1
TCGA-EJ-5518-01	ATM,CDKN1B,NSD1
TCGA-EJ-5519-01	NSD1,SPECC1L,SYNE1
TCGA-EJ-5521-01	ERG,PTEN,SGK1,TP53
TCGA-EJ-5522-01	NBPF1,PTEN,SPECC1L
TCGA-EJ-5524-01	WWOX
TCGA-EJ-5525-01	TP53,WWOX
TCGA-EJ-5526-01	NRG1,SPECC1L,STEAP1B
TCGA-EJ-5527-01	MUC4,NSD1,SIRPB1
TCGA-EJ-5530-01	NKX3-1
TCGA-EJ-5531-01	MUC4,NSD1,SPECC1L,SPOP
TCGA-EJ-5532-01	SGK1
TCGA-EJ-5542-01	PTEN,SPECC1L
TCGA-CH-5767-01	NKX3-1,SIRPB1,WWOX
TCGA-G9-6332-01	HTR7,SPECC1L
TCGA-G9-6336-01	SPECC1L
TCGA-G9-6348-01	NBPF1,SPECC1L
TCGA-G9-6356-01	MUC4,NBPF1,NSD1,PTEN,SIRPB1
TCGA-G9-6362-01	KIAA1217,MED12,NBPF1,ZMYM3
TCGA-G9-6363-01	DNAH9,PTEN
TCGA-G9-6364-01	SPECC1L
TCGA-G9-6365-01	KIAA1217,MUC4,NBPF1
TCGA-G9-6367-01	SPECC1L
TCGA-G9-6370-01	SIRPB1
TCGA-G9-6371-01	AGAP10
TCGA-G9-6373-01	SPECC1L
TCGA-G9-6378-01	OBSCN
TCGA-G9-6384-01	SIRPB1
TCGA-G9-6385-01	PCYT1B
TCGA-G9-6494-01	MUC4,ST6GAL2
TCGA-G9-6496-01	SPECC1L
TCGA-EJ-7123-01	MUC4,SPECC1L,SPOP,ST6GAL2
TCGA-EJ-7125-01	IDH1,NSD1,SGK1
TCGA-G9-6329-01	COL12A1,NBPF1
TCGA-G9-6333-01	SPOP
TCGA-G9-6338-01	SPOP,WWOX
TCGA-G9-6342-01	PTEN,WWOX
TCGA-G9-6343-01	GUCY1B3,KIAA1217
TCGA-G9-6351-01	FOXA1,SPECC1L
TCGA-G9-6353-01	GUCY1B3,SPECC1L
TCGA-G9-6361-01	PTEN,SPECC1L
TCGA-G9-6369-01	SPECC1L,SPOP
TCGA-G9-6377-01	WWOX
TCGA-G9-6499-01	TP53
TCGA-HC-7075-01	MYOF
TCGA-HC-7077-01	NSD1
TCGA-HC-7079-01	NRG1
TCGA-HC-7080-01	BCLAF1,SPOP
TCGA-HC-7081-01	NBPF1,PTEN
TCGA-EJ-7115-01	GUCY1B3,SGK1,SPOP
TCGA-EJ-7314-01	ERG,PTEN
TCGA-EJ-7315-01	PTEN,SPECC1L,TP53
TCGA-EJ-7317-01	SPECC1L
TCGA-EJ-7327-01	ERG,NSD1,PTEN,SGK1
TCGA-EJ-7328-01	NSD1
TCGA-EJ-7330-01	FOXA1,SPOP
TCGA-EJ-7331-01	NSD1,SPECC1L
TCGA-EJ-7781-01	MUC4,PKHD1,TP53
TCGA-EJ-7782-01	FOXA1,OBSCN,RYR1,SPOP
TCGA-EJ-7783-01	ATM,MUC4,NSD1
TCGA-EJ-7784-01	ATM,DNAH9,ERG,NRG3,SPECC1L
TCGA-EJ-7785-01	SPECC1L
TCGA-EJ-7786-01	CDKN1B
TCGA-EJ-7788-01	ACAN,PTEN,STEAP1B
TCGA-EJ-7789-01	FOXA1,NRG1
TCGA-EJ-7791-01	NSD1,PTEN
TCGA-EJ-7792-01	COL12A1,STEAP1B
TCGA-EJ-7794-01	BCLAF1,MUC4
TCGA-FC-7708-01	NRG3,PTEN
TCGA-G9-6366-01	BCLAF1,MUC4,PTEN,SPECC1L
TCGA-H9-7775-01	DNAH9
TCGA-HC-7078-01	MUC4,SIRPB1
TCGA-HC-7209-01	PTEN,SPECC1L
TCGA-HC-7210-01	FOXA1
TCGA-HC-7211-01	NBPF1,WWOX
TCGA-HC-7212-01	MCPH1,PTEN,SIRPB1
TCGA-HC-7213-01	COL12A1,PTEN,SIRPB1,TP53
TCGA-HC-7230-01	MUC4,PTEN,SIRPB1,TP53,WWOX
TCGA-HC-7231-01	MUC4,PTEN
TCGA-HC-7232-01	GUCY1B3,OBSCN,SPECC1L
TCGA-HC-7233-01	NBPF1
TCGA-HC-7736-01	NSD1
TCGA-HC-7737-01	GUCY1B3,MUC4,NRG1
TCGA-HC-7738-01	BCLAF1
TCGA-HC-7740-01	MUC4,NSD1,SIRPB1
TCGA-HC-7742-01	BRAF,MUC4,PTEN,TP53
TCGA-HC-7744-01	ERG,NSD1,SPECC1L
TCGA-HC-7745-01	PKHD1
TCGA-HC-7747-01	ACAN,MUC4
TCGA-HC-7748-01	PTEN,WWOX
TCGA-HC-7749-01	BCLAF1
TCGA-HC-7750-01	BCLAF1
TCGA-HC-7752-01	BCLAF1,SPECC1L
TCGA-HC-7818-01	NSD1
TCGA-HC-7819-01	MCPH1
TCGA-HC-7820-01	OBSCN,STEAP1B
TCGA-HC-7821-01	MUC4
TCGA-HI-7168-01	SIRPB1
TCGA-HI-7169-01	RYR1
TCGA-HI-7170-01	MUC4
TCGA-HI-7171-01	NSD1,SIRPB1,TP53
TCGA-EJ-7321-01	NRG1
TCGA-EJ-7793-01	COL12A1
TCGA-EJ-7797-01	NSD1
TCGA-G9-7510-01	ATM,SPOP,TP53
TCGA-G9-7519-01	MED12
TCGA-G9-7521-01	ATM,OBSCN,STEAP1B,TP53
TCGA-G9-7522-01	MUC4,PTEN
TCGA-G9-7523-01	IDH1
TCGA-G9-7525-01	SYNE1
TCGA-HC-8256-01	NBPF1,SIRPB1,ST6GAL2,STEAP1B
TCGA-HC-8257-01	PKHD1,SPECC1L
TCGA-HC-8258-01	MUC4,NRG1,NSD1,SPOP
TCGA-HC-8259-01	MUC4,NRG1
TCGA-HC-8260-01	ATM,NSD1
TCGA-HC-8261-01	MUC4,SPOP,ST6GAL2
TCGA-HC-8262-01	ERG
TCGA-HC-8265-01	FOXA1,GUCY1B3,KIAA1217,MUC4,NRG1,NSD1,OBSCN,ST6GAL2,SYNE1,WWOX
TCGA-HC-8266-01	GUCY1B3,NSD1,SIRPB1,SYNE1
TCGA-J4-8198-01	NRG1,NSD1
TCGA-EJ-8468-01	NSD1,SIRPB1,SPOP
TCGA-EJ-8469-01	MUC4,NSD1,PTEN
TCGA-EJ-8470-01	NSD1,STEAP1B
TCGA-EJ-8472-01	RYR1,TP53
TCGA-EJ-8474-01	NSD1,SGK1,SIRPB1
TCGA-HC-8264-01	SPECC1L,TP53
TCGA-EJ-A46B-01	AGAP10,SPECC1L
TCGA-EJ-A46D-01	AGAP10,SPECC1L,STEAP1B
TCGA-EJ-A46E-01	SIRPB1,STEAP1B
TCGA-EJ-A46F-01	ERG,KIAA1217,SYNE1
TCGA-FC-A4JI-01	STEAP1B
TCGA-HC-A48F-01	TP53,WWOX
TCGA-KC-A4BL-01	NRG1,TP53
TCGA-KC-A4BN-01	BRAF,STEAP1B
TCGA-KC-A4BR-01	KIAA1217
TCGA-EJ-A46G-01	NSD1
TCGA-EJ-A46H-01	NRG1
TCGA-EJ-A46I-01	WWOX
TCGA-HC-A4ZV-01	ATM,SPECC1L,ST6GAL2
TCGA-J9-A52B-01	AGAP10,ERG,OBSCN,SIRPB1,SPECC1L,SYNE1,TP53
TCGA-J9-A52C-01	BCLAF1,KIAA1217,STAB2,SYNE1
TCGA-J9-A52E-01	NRG3,STEAP1B,WWOX
TCGA-KC-A4BV-01	PTEN,SIRPB1,ZMYM3
TCGA-KK-A59Y-01	MYOF,PTEN
TCGA-KK-A59Z-01	SPOP,ST6GAL2,STAB2,SYNE1
TCGA-EJ-A65E-01	BRAF,NBPF1,SPOP,ST6GAL2
TCGA-EJ-A65G-01	AGAP10,KIAA1217
TCGA-EJ-A65M-01	PKHD1,RYR1,SPOP,SYNE1
TCGA-FC-7961-01	KIAA1217,PTEN,SIRPB1,SPECC1L,SPOP,STEAP1B
TCGA-FC-A5OB-01	SPECC1L
TCGA-HC-7817-01	SIRPB1
TCGA-HC-8213-01	SPECC1L
TCGA-HC-8216-01	STAB2,STEAP1B,TP53,WWOX
TCGA-HC-A631-01	PKHD1,PTEN,TP53
TCGA-HC-A632-01	NSD1,TP53
TCGA-J4-8200-01	MUC4,OBSCN,SIRPB1
TCGA-KK-A59V-01	BRAF,CDKN1B,MUC4,MYOF,NRG3,OBSCN,RYR1,SPOP,ZMYM3
TCGA-KK-A59X-01	MUC4,SPOP,WWOX
TCGA-EJ-A65B-01	POLR2D,WWOX
TCGA-EJ-A65D-01	PTEN,WWOX
TCGA-FC-A66V-01	GUCY1B3
TCGA-H9-A6BY-01	ACAN,ERG,SPECC1L,WWOX
TCGA-HC-A6AL-01	MED12,MUC4,PTEN
TCGA-HC-A6AN-01	KIAA1217,PCYT1B,SPECC1L
TCGA-HC-A6AO-01	FOXA1,NBPF1,POLR2D,SPECC1L
TCGA-HC-A6AP-01	FOXA1,MUC4,SIRPB1,SPECC1L,SPOP,WWOX
TCGA-HC-A6AQ-01	SPECC1L,STEAP1B
TCGA-HC-A6AS-01	COL12A1
TCGA-J4-A67K-01	SPECC1L
TCGA-J4-A67L-01	SIRPB1,TP53
TCGA-J4-A67M-01	SYNE1
TCGA-J4-A67N-01	KIAA1217,SIRPB1
TCGA-J4-A67O-01	WWOX
TCGA-J4-A67Q-01	ATM,SPECC1L
TCGA-J4-A67R-01	RYR1,SPECC1L
TCGA-J4-A67S-01	SIRPB1,STEAP1B
TCGA-KK-A6E3-01	MCPH1
TCGA-KK-A6E4-01	STEAP1B
TCGA-EJ-A65F-01	STEAP1B
TCGA-EJ-A65J-01	PTEN,STEAP1B
TCGA-G9-6339-01	STEAP1B
TCGA-G9-6354-01	GUCY1B3
TCGA-G9-6498-01	BRAF
TCGA-H9-A6BX-01	RYR1
TCGA-J4-A67T-01	GUCY1B3,SGK1,SIRPB1
TCGA-J4-A6G1-01	KIAA1217,SPECC1L
TCGA-J4-A6G3-01	SIRPB1,SPOP
TCGA-KK-A6DY-01	PTEN,TP53
TCGA-KK-A6E0-01	PTEN,SIRPB1,SPECC1L,SPOP
TCGA-KK-A6E1-01	NBPF1,PTEN,SPECC1L
TCGA-KK-A6E2-01	SIRPB1,WWOX,ZMYM3
TCGA-KK-A6E5-01	SIRPB1
TCGA-KK-A6E6-01	POLR2D,SYNE1,WWOX
TCGA-FC-A6HD-01	OBSCN
TCGA-G9-6347-01	OBSCN,SGK1,WWOX
TCGA-G9-6379-01	RYR1,SPECC1L
TCGA-HC-A6HX-01	POLR2D,STEAP1B
TCGA-HC-A6HY-01	ACAN
TCGA-J4-A6M7-01	BCLAF1
TCGA-KK-A6E7-01	IDH1,PTEN
TCGA-KK-A6E8-01	POLR2D,SIRPB1,SPECC1L
TCGA-QU-A6IL-01	FOXA1,GUCY1B3,PCYT1B
TCGA-QU-A6IM-01	MYOF,NRG1,SPOP
TCGA-QU-A6IN-01	FOXA1
TCGA-QU-A6IO-01	GUCY1B3
TCGA-QU-A6IP-01	NRG1,SPECC1L
TCGA-EJ-7218-01	NBPF1,NSD1,SIRPB1
TCGA-EJ-7312-01	SGK1,SYNE1
TCGA-EJ-7318-01	GUCY1B3,KIAA1217,POLR2D
TCGA-EJ-7325-01	ST6GAL2
TCGA-EJ-A6RC-01	KIAA1217,SIRPB1,SPECC1L,WWOX
TCGA-KK-A7AU-01	NRG1,PTEN,SPECC1L,TP53,WWOX
TCGA-KK-A7AV-01	NRG1,SPECC1L
TCGA-KK-A7AW-01	PKHD1
TCGA-KK-A7AZ-01	WWOX
TCGA-KK-A7B0-01	KIAA1217,SIRPB1,SPECC1L,SPOP,STAB2
TCGA-KK-A7B1-01	SPECC1L
TCGA-KK-A7B2-01	ZMYM3
TCGA-KK-A7B4-01	PTEN,TP53
TCGA-M7-A71Y-01	GUCY1B3
TCGA-M7-A71Z-01	ERG,WWOX
TCGA-M7-A720-01	NBPF1,NSD1,SPECC1L
TCGA-M7-A721-01	STEAP1B
TCGA-M7-A723-01	SIRPB1,WWOX
TCGA-M7-A724-01	KIAA1217,SPECC1L
TCGA-M7-A725-01	ATM
TCGA-EJ-A6RA-01	ST6GAL2
TCGA-EJ-A7NF-01	PCYT1B
TCGA-EJ-A7NG-01	SPECC1L
TCGA-EJ-A7NH-01	SPECC1L,TP53
TCGA-EJ-A7NM-01	PCYT1B,PTEN
TCGA-EJ-A7NN-01	STAB2
TCGA-HC-A76W-01	KIAA1217,ZMYM3
TCGA-HC-A76X-01	ERG
TCGA-KC-A7F3-01	MED12
TCGA-KC-A7F5-01	FOXA1,SPOP
TCGA-KC-A7F6-01	TP53
TCGA-KC-A7FA-01	RYR1,SIRPB1,TP53
TCGA-KC-A7FD-01	AGAP10
TCGA-KC-A7FE-01	AGAP10,KIAA1217
TCGA-KK-A7AP-01	ZMYM3
TCGA-KK-A7AQ-01	KIAA1217,NRG1,SPOP
TCGA-KK-A7AY-01	HTR7
TCGA-KK-A7B3-01	NBPF1,PTEN
TCGA-SU-A7E7-01	AGAP10,NSD1,OBSCN
TCGA-EJ-A7NJ-01	SPECC1L
TCGA-EJ-A7NK-01	SGK1
TCGA-EJ-A8FN-01	BRAF,KIAA1217
TCGA-EJ-A8FS-01	SPOP,STEAP1B
TCGA-J4-A83K-01	KIAA1217,WWOX
TCGA-J4-A83L-01	COL12A1
TCGA-J4-A83M-01	STEAP1B
TCGA-J4-A83N-01	MUC4
TCGA-J9-A8CK-01	STEAP1B,TP53,WWOX
TCGA-J9-A8CL-01	SYNE1
TCGA-J9-A8CM-01	ERG,SIRPB1
TCGA-J9-A8CN-01	SIRPB1
TCGA-J9-A8CP-01	FOXA1,GUCY1B3
TCGA-KK-A8IJ-01	SPECC1L
TCGA-VN-A88I-01	NRG1
TCGA-VN-A88K-01	ATM,STAB2
TCGA-VN-A88L-01	ERG
TCGA-VN-A88M-01	SIRPB1
TCGA-VN-A88O-01	NRG3,SPOP
TCGA-VN-A88P-01	WWOX
TCGA-VN-A88Q-01	ERG,PTEN,SPECC1L
TCGA-VP-A872-01	ERG,PTEN,RYR1,TP53
TCGA-VP-A875-01	POLR2D
TCGA-VP-A876-01	ERG,NSD1,SPECC1L,TP53,WWOX
TCGA-VP-A878-01	DNAH9,SPECC1L,SPOP,STEAP1B
TCGA-VP-A879-01	SIRPB1,STEAP1B
TCGA-VP-A87B-01	NRG1,NSD1,SGK1,SPOP,WWOX
TCGA-VP-A87C-01	SYNE1
TCGA-VP-A87D-01	NSD1,SIRPB1,TP53
TCGA-VP-A87E-01	STEAP1B
TCGA-VP-A87H-01	SPOP
TCGA-VP-A87J-01	CDKN1B,MED12,NSD1,PTEN,SGK1,SPECC1L,STEAP1B
TCGA-VP-A87K-01	STEAP1B
TCGA-XJ-A83F-01	MCPH1,POLR2D
TCGA-XJ-A83G-01	PKHD1,SPOP
TCGA-XJ-A83H-01	ST6GAL2
