# Supplementary material for: HIT'nDRIVE: patient-specific multidriver gene prioritization for precision oncology
Source: HighWire-hosted journal article supplement (doi:10.1101/gr.221218.117), 2017-07-18
Supplement: Supplemental_Table_S8.xlsx [file Supplemental_Table_S8.xlsx]

## Sheet: Supplemental_Table_S8
Supplemental Table S8. Patient Specific Driver Genes of TCGA-BRCA
TCGA.Sample.ID	Genes
TCGA-A2-A0CX-01	ACACA,NOX4,PPP2R3A,SIRPB1,TP53,WWOX
TCGA-A2-A0D0-01	CATSPERG,CDH13,LRBA,SIRPB1,THBS3,TP53
TCGA-A2-A0D4-01	CHL1,MACF1,NSD1,PHF11
TCGA-A7-A0CD-01	KCNQ5,MUC5B,NSD1
TCGA-A7-A0CE-01	TBC1D5,TP53
TCGA-A7-A0CG-01	PIK3CA,SIRPB1
TCGA-A7-A0CH-01	CES1,NSD1,PIK3CA,SIRPB1
TCGA-A7-A0CJ-01	MUC16,PIK3CA,SYNJ2,TP53
TCGA-A7-A0DB-01	MAP3K1,PIK3CA,SCN2A,SYNJ2
TCGA-A7-A0DC-01	CDC16,CDH13,CES1,DMD,DPP6,PTPRD,RYR2
TCGA-A8-A06N-01	CES1,GALNTL6,PHF12
TCGA-A8-A06O-01	CCND1,DNAH6,DPP6,GALNTL6,NSD1,PTEN,SHANK2,TP53
TCGA-A8-A06P-01	GALNTL6,MAP3K1,PIK3CA
TCGA-A8-A06R-01	INADL,MUC16,PIK3CA,PTEN,PTPRD
TCGA-A8-A06T-01	ANK2,APOB,ARID2,CDC16,GABBR2,GATA3
TCGA-A8-A06U-01	GPR98,KATNAL1,PIK3CA,SIRPB1,TP53
TCGA-A8-A06X-01	GATA3,INADL,MST1,PARD3B,PIK3C2B,SIRPB1
TCGA-A8-A06Y-01	GATA3,GUCY1B3,NSD1,PPP2R3A
TCGA-A8-A06Z-01	TP53
TCGA-A8-A076-01	KCNQ5,NSD1,RIMS1,WWOX
TCGA-A8-A079-01	CCND1,CNTN1,GATA3,INTS4,TP53
TCGA-A8-A07B-01	CDH1,CES1,PIK3CA,THBS3,TP53
TCGA-A8-A07F-01	CDH1,MAP3K1,NSD1
TCGA-A8-A07I-01	ACACA,AHNAK,BRCA2,DPP6,MUC16,WWOX
TCGA-A8-A07J-01	MUC16,PIK3CA
TCGA-A8-A07L-01	GALNTL6,GNAS,MGAM,NSD1
TCGA-A8-A07O-01	DPP6,MUC16,MUC5B,TP53
TCGA-A8-A07P-01	KDM4C
TCGA-A8-A07W-01	CCND1,MACF1,SIRPB1,SMARCA2,TBC1D5,TP53
TCGA-A8-A07Z-01	NOX4,PIK3CA,SIRPB1
TCGA-A8-A081-01	COL14A1,PIK3CA,TP53
TCGA-A8-A082-01	CCND1,FGFR1,MAP3K1,NRXN2,NSD1,SHANK2
TCGA-A8-A083-01	GATA3,MUC16
TCGA-A8-A084-01	ANK2,PIK3CA,SIRPB1,TP53
TCGA-A8-A085-01	BRCA2,KCNQ5,KSR1,NSD1
TCGA-A8-A086-01	FGFR1,INTS4,MAP3K1,WWOX
TCGA-A8-A08A-01	SIRPB1,WWOX
TCGA-A8-A08B-01	ACACA,BRCA2,CDH13,CECR2,CHL1,GUCY1B3,MDGA2,NSD1,PIK3CA
TCGA-A8-A08C-01	GNAS
TCGA-A8-A08F-01	CECR2,NRXN2,WWOX
TCGA-A8-A08G-01	GATA3,GUCY1B3,KCNQ5
TCGA-A8-A08H-01	PAPOLA
TCGA-A8-A08I-01	SCN2A,SIRPB1,TP53
TCGA-A8-A08J-01	COL14A1,GATA3,GUCY1B3
TCGA-A8-A08L-01	APBA1,BRCA2,DMD,DPP10,GUCY1B3,PIK3CA,PTPRD,RYR2,SHANK2
TCGA-A8-A08P-01	GALNTL6,PIK3CA,SMARCA2,TP53,WWOX
TCGA-A8-A08T-01	CHL1,DPP6,NCOA3,NSD1,PIK3CA,PPP2R3A
TCGA-A8-A08X-01	DPP6,TP53
TCGA-A8-A08Z-01	MAP3K1,PIK3CA
TCGA-A8-A090-01	MAP3K1,NSD1,WWOX
TCGA-A8-A091-01	CDH1,GALNTL6,ROCK1,WWOX
TCGA-A8-A092-01	LRRK1,MUC16,NSD1,PIK3CA,TP53
TCGA-A8-A093-01	CCND1,DPP6,MUC16,PIK3CA,SHANK2
TCGA-A8-A094-01	CDH13,COL14A1,DMXL2,DPP6,MACF1,MDGA2,PTPRD,TP53
TCGA-A8-A095-01	MED1,NSD1,PIK3CA,SLC34A1
TCGA-A8-A096-01	PIK3CA
TCGA-A8-A099-01	WWOX
TCGA-A8-A09A-01	CATSPERG,GALNTL6,KCNQ5,MACF1,MGAM
TCGA-A8-A09B-01	CDH13,MAP3K1,NSD1,PIK3CA
TCGA-A8-A09C-01	CHL1,PIK3CA
TCGA-A8-A09D-01	MUC5B,NCOA3,NSD1,PIK3CA,SIRPB1,WWOX
TCGA-A8-A09E-01	GUCY1B3,LRBA,MGAM,PTEN,SHANK2
TCGA-A8-A09G-01	CECR2,CHL1,DNAH8,GPR98,INADL,LRBA,MUC16,NSD1,PPP2R3A,RYR2
TCGA-A8-A09K-01	CHL1,THBS3
TCGA-A8-A09M-01	MAP3K1,PIK3C2B,TRIP12
TCGA-A8-A09N-01	MUC16,TP53
TCGA-A8-A09Q-01	APOB,KCNQ5,NSD1,PTPRD,TP53,WWOX
TCGA-A8-A09R-01	DPP6,GATA3,MED1
TCGA-A8-A09T-01	ATAD5,CDH1,CDH13,DNAH8,GNAS
TCGA-A8-A09W-01	CDH1,CES1,HECTD1,SMARCA2
TCGA-A8-A09X-01	CDH1,DMD,TP53
TCGA-A8-A09Z-01	AKAP6,APOB,ATP2B1,CDH1,DPP10,FDFT1,GATA3,GNAS,GPR98,LRBA,LRRK1,MUC5B,OTUD4,PAPOLA,PTPRM,SCN2A,SLC34A1,SMARCA2,TRIO
TCGA-A8-A0A1-01	KCNQ5,PIK3CA
TCGA-A8-A0A4-01	CDH1,MED1
TCGA-A8-A0A7-01	CDH1,NCOA3,PIK3CA
TCGA-A8-A0A9-01	CDH1,CES1,INTS4,MUC16,PIK3CA,WWOX
TCGA-AN-A03X-01	CES1,MAP3K1,PIK3CA
TCGA-AN-A03Y-01	CCND1,CDH1,INTS4,LRRK1,NSD1,PIK3CA
TCGA-AN-A049-01	MAP3K1,PIK3CA
TCGA-AN-A0AJ-01	FMN2,KSR1,NSD1,PIK3CA,RYR2,SHANK2,SIRPB1,TP53,WWOX
TCGA-AN-A0AK-01	ATAD5,CDH1,CDK12,DMD,DMXL2,DNAH8,DPP10,DPP6,GATA3,INTS4,LRBA,MDGA2,MED1,NSD1,PIK3CA,ROCK1,TBC1D5
TCGA-AN-A0AL-01	MUC5B,NELL2,TP53
TCGA-AN-A0AR-01	GPR98,RBMX,TP53
TCGA-AN-A0AS-01	MAP3K1,SIRPB1,TP53
TCGA-AN-A0FJ-01	DPP6,E2F3,MUC16,NSD1,TP53,TRIP12
TCGA-AN-A0FV-01	CNOT1,INTS4,RYR2,TP53
TCGA-AO-A03O-01	ACACA,PIK3CA,TP53
TCGA-AO-A03P-01	GATA3,MED1
TCGA-BH-A0AY-01	PTPRD,RPGR
TCGA-BH-A0B4-01	GPR98,KCNQ5,MUC16,WWOX
TCGA-BH-A0BV-01	PIK3CA
TCGA-BH-A0DZ-01	DNAH8,MAP3K1,TP53
TCGA-A2-A04P-01	MUC12,PIK3CA,TP53
TCGA-A2-A04Q-01	ARID2,KCNQ5,MED1,MST1,PPP2R3A
TCGA-A2-A04T-01	DMXL2,PAPOLA,PIK3CA,THBS3,TP53
TCGA-A2-A04V-01	PIK3CA
TCGA-A2-A04X-01	MGAM,WWOX
TCGA-A2-A04Y-01	APBA1,ARID2
TCGA-A2-A0CM-01	TP53
TCGA-A2-A0CP-01	DNAH6,MAP3K1,PIK3CA
TCGA-A2-A0CQ-01	COL14A1,MACF1,PIK3R1
TCGA-A2-A0CU-01	CDK12
TCGA-A2-A0CZ-01	GATA3
TCGA-A2-A0D1-01	GPR98,KCNQ5,MUC16,PIK3CA,SHANK2,SPAG17,TP53
TCGA-A2-A0D2-01	RPGR,TP53
TCGA-A2-A0EM-01	PIK3CA,PPP2R3A
TCGA-A2-A0EO-01	MACF1,PIK3CA
TCGA-A2-A0EQ-01	NSD1,PIK3CA,TP53
TCGA-A2-A0ER-01	FGFR1,MUC5B
TCGA-A2-A0ET-01	GALNTL6,SIRPB1
TCGA-A2-A0EV-01	NSD1,PIK3CA
TCGA-A2-A0EX-01	CDH1,PIK3CA
TCGA-A2-A0EY-01	ACACA,DMXL2,MED1,PIK3CA,PPP2R3A,SIRPB1,TP53
TCGA-A8-A06Q-01	GNAS,MUC12,PIK3CA,PIK3R1,SHANK2,TP53
TCGA-A8-A07C-01	DNAH6,MUC5B,TP53
TCGA-A8-A07E-01	CDK12,FMN2,OTUD4,PIK3CA
TCGA-A8-A07G-01	PIK3CA,WWOX
TCGA-A8-A07R-01	CHL1,GUCY1B3,SYNJ2,TP53
TCGA-A8-A07U-01	TP53
TCGA-A8-A08R-01	CES1,CNTN1,DNAH8,LRBA,MUC12,PIK3CA,TP53,WWOX
TCGA-A8-A08S-01	ACACA,ATAD5,CDH13,PIK3R1,RIMS1
TCGA-A8-A097-01	COL14A1,DMXL2,DPP6,MUC12,PAPOLA,PPP2R3A,TP53
TCGA-A8-A09I-01	GABBR2,MED1,PTPRD,USP32
TCGA-A8-A09V-01	CDH1,FMN2,MUC16,PHF11
TCGA-A8-A0A2-01	CDH1,NSD1,PPP2R3A
TCGA-A8-A0AB-01	CDH1
TCGA-AN-A041-01	DPP6,GATA3
TCGA-AN-A04A-01	GATA3
TCGA-AN-A04C-01	PIK3CA,TP53
TCGA-AN-A04D-01	LRBA,MUC16,PHF11
TCGA-AN-A0AM-01	GATA3,NSD1,TRIO
TCGA-AN-A0AT-01	BRCA2,DNAH6,FMN2
TCGA-AN-A0FD-01	GATA3,UBE3A
TCGA-AN-A0FF-01	COL14A1,GNAS,PIK3CA
TCGA-AN-A0FK-01	TRIP12
TCGA-AN-A0FL-01	ANK2,RIMS1,TP53
TCGA-AN-A0FN-01	DPP6
TCGA-AN-A0FS-01	COL14A1,PIK3CA
TCGA-AN-A0FT-01	ACACA,DMD,DNAH6,DPP6,MED1,PHF12,TP53,UBE3A
TCGA-AN-A0FW-01	ARID2,GNAS
TCGA-AN-A0FX-01	ATP2B1,DPP6,TP53
TCGA-AN-A0FY-01	DMD,DTNB,GNAS,GUCY1B3,LCT,SLC25A17,TP53
TCGA-AN-A0FZ-01	GATA3,INTS4,NELL2,PPP2R3A,PTPRD
TCGA-AN-A0G0-01	COL14A1,INTS4,TP53,USP9X
TCGA-AO-A03R-01	PPP2R3A,TP53
TCGA-AO-A03T-01	CECR2,MUC16,SIRPB1,SYNJ2
TCGA-AO-A0J2-01	CECR2,TP53
TCGA-AO-A0J3-01	DPP6,FGFR1,GATA3,MUC12
TCGA-AO-A0J4-01	ACACA,DPP6,GALNTL6,TP53
TCGA-AO-A0J5-01	GATA3,NCOA3,PIK3CA,USP32
TCGA-AO-A0J6-01	AHNAK,PIK3C2B,RIMS1,SIRPB1,TP53
TCGA-AO-A0J7-01	GUCY1B3,KSR1,MAP3K1,PIK3CA
TCGA-AO-A0J8-01	CDH1
TCGA-AO-A0J9-01	CDH1,MACF1,WWOX
TCGA-AQ-A04J-01	TP53
TCGA-B6-A0I2-01	SMARCA2,TP53,UBE3A
TCGA-B6-A0I5-01	DPP6,GATA3,PIK3CA,WWOX
TCGA-B6-A0I6-01	DNAH6,GPR98,PTPRD,RIMS1
TCGA-B6-A0I8-01	DMD,DPP6,GUCY1B3,KDM4C,MDGA2,RPGR
TCGA-B6-A0I9-01	GATA3,MED1,PPP2R3A,TP53
TCGA-B6-A0IA-01	WWOX
TCGA-B6-A0IB-01	DNAH8,NRXN2,PTEN
TCGA-B6-A0IC-01	PIK3CA,WWOX
TCGA-B6-A0IE-01	DPP6,LCT,PIK3CA,SIRPB1,TP53
TCGA-B6-A0IG-01	CECR2,PPP2R3A
TCGA-B6-A0IJ-01	CHL1,NOX4,TP53
TCGA-B6-A0IM-01	COL14A1,GATA3,MAP3K1,SIRPB1,WWOX
TCGA-B6-A0IN-01	CHL1,GATA3,MED1,MST1,PPP2R3A,ROCK1
TCGA-B6-A0IO-01	GATA3,GUCY1B3,MAP3K1,PTEN,WWOX
TCGA-B6-A0IP-01	CDH1,DNAH6,PIK3CA,PPP2R3A
TCGA-B6-A0IQ-01	DSPP,TP53
TCGA-BH-A0BD-01	CCND1,PIK3CA,RYR2,SHANK2
TCGA-BH-A0E6-01	NOX4,SIRPB1,TP53
TCGA-BH-A0E7-01	MAP3K1,MED1
TCGA-BH-A0EB-01	NSD1,PIK3CA
TCGA-BH-A0EE-01	CDH13,CNOT1,PIK3CA,PIK3R1
TCGA-BH-A0HL-01	DMD,GATA3,KCNQ5,MUC5B,PPP2R3A
TCGA-BH-A0HO-01	ITGA2
TCGA-BH-A0HQ-01	DNAH6,MED1,PTPRD,RSRC1,WWOX
TCGA-BH-A0HU-01	CECR2,DPP6,FMN2,GUCY1B3,PIK3CA,RSRC1
TCGA-BH-A0HW-01	ARHGAP26,CATSPERG,MED1,PPP2R3A,PTPRD,WWOX
TCGA-A2-A0CT-01	ANK2,CDH13
TCGA-A2-A0EU-01	MAP3K1
TCGA-A7-A0D9-01	FGFR1,GNAS,PIK3CA
TCGA-A8-A08O-01	AGAP1,APOB,PIK3CA,WWOX
TCGA-A8-A0AD-01	KDM4C,NSD1,SIRPB1
TCGA-AO-A03L-01	CHL1,DPP6,PIK3CA,TP53
TCGA-AO-A0JA-01	MUC5B,PIK3CA,PTEN,TBC1D5
TCGA-AO-A0JB-01	DPP6,TP53
TCGA-AO-A0JC-01	GPR98
TCGA-AO-A0JD-01	TP53,USP9X
TCGA-AO-A0JE-01	PIK3CA,TP53
TCGA-AO-A0JF-01	MAP3K1,MUC5B,PIK3CA
TCGA-AO-A0JI-01	CES1,FGFR1,NRXN2
TCGA-AO-A0JJ-01	CDH1,WWOX
TCGA-AO-A0JL-01	TP53
TCGA-AO-A0JM-01	ACACA,CDK12,CHL1,MED1,NSD1
TCGA-B6-A0IK-01	INADL,MGAM,MUC16,PIK3CA,TP53
TCGA-B6-A0RE-01	APOB,COL14A1,TP53,WWOX
TCGA-B6-A0RG-01	GATA3,HECTD1,PIK3CA,PTPRD
TCGA-B6-A0RI-01	LRBA
TCGA-BH-A0AW-01	APOB,ARID2,COL1A1,MED1,MUC16,SIRPB1,TP53,WWOX
TCGA-BH-A0B1-01	DMD,ITGA2,NSD1,WWOX
TCGA-BH-A0B3-01	DMD,DPP6,SCN2A,TP53
TCGA-BH-A0B8-01	CECR2,DPP6,MED1,MUC5B,PARD3B,RYR2,WWOX
TCGA-BH-A0B9-01	NSD1,TP53
TCGA-BH-A0BA-01	CDH1,NSD1,PHF12,PIK3CA,WWOX
TCGA-BH-A0BJ-01	NSD1,PIK3CA
TCGA-BH-A0BM-01	PIK3CA
TCGA-BH-A0C0-01	PTPRD,TP53,UBE3A
TCGA-BH-A0DK-01	GATA3,PIK3CA,SMARCA2,WWOX
TCGA-BH-A0DP-01	PIK3CA
TCGA-BH-A0DS-01	GATA3
TCGA-BH-A0E0-01	ARID2,CDH13,DPP6,TP53
TCGA-BH-A0E1-01	APOB,CES1,WWOX
TCGA-BH-A0E2-01	GATA3
TCGA-BH-A0GY-01	PIK3CA,TP53
TCGA-BH-A0GZ-01	GALNTL6,PTEN
TCGA-BH-A0H0-01	RIMS1
TCGA-BH-A0H6-01	FDFT1,MAP3K1
TCGA-BH-A0H7-01	FDFT1,SIRPB1,TP53
TCGA-BH-A0H9-01	CDK12,DMD,DPP6,MUC5B,NCOA3,PIK3CA
TCGA-BH-A0HB-01	CDK12,LRBA,LRRK1
TCGA-BH-A0HF-01	AKAP6,BRCA2,CDH13,CECR2,COL14A1,DNAH6,DPP6,GATA3,GPR98,LCT,PIK3CA,PTPRD,PTPRM,RIMS1,RYR2,TRIO
TCGA-BH-A0HK-01	FDFT1,FMN2,RBMX,WWOX
TCGA-BH-A0HX-01	MACF1,NSD1,RPGR,SHANK2,TP53
TCGA-BH-A0HY-01	ACACA,AKAP6,CCND1,INTS4,SHANK2,TBC1D5,TP53,WWOX
TCGA-A1-A0SE-01	CDH1,MUC16
TCGA-A1-A0SH-01	COL14A1,DMD,DNAH8,MUC12,NSD1,RYR2,WWOX
TCGA-A1-A0SJ-01	INTS4,NOX4
TCGA-A1-A0SK-01	AHNAK,MUC12,TP53
TCGA-A1-A0SM-01	ACACA,CES1
TCGA-A1-A0SO-01	CES1,MACF1,SLC34A1,TP53
TCGA-A1-A0SP-01	ARID2,MUC12,RBMX,TP53
TCGA-A2-A0EN-01	LCT,PIK3CA
TCGA-A2-A0ST-01	ARID2,DPP6,DSPP
TCGA-A2-A0SU-01	ACACA,BRCA2,GATA3
TCGA-A2-A0SV-01	GUCY1B3,PTEN,TP53
TCGA-A2-A0SW-01	LRBA,PIK3R1,PPP2R3A,TP53
TCGA-A2-A0SX-01	COL14A1,TP53,WWOX
TCGA-A2-A0SY-01	ATP2B1,CDH1,DNAH6,MED1,NOX4,NSD1,PIK3CA
TCGA-A2-A0T0-01	AKAP6,BRCA2,DMD,FMN2,INADL,MUC16,WWOX
TCGA-A2-A0T1-01	CES1,TP53
TCGA-A2-A0T2-01	MED1,NRXN2,TP53
TCGA-A2-A0T4-01	ARID2,CDH1,INTS4,PIK3CA
TCGA-A2-A0T5-01	AHNAK,APOB,CBX8,CES1,CNGB1,CNOT1,GATA3,LRBA,MACF1,MUC12,MUC16,PIK3C2B,RBMX,RSRC1,SHANK2,WWOX
TCGA-A2-A0T6-01	CDH1,MUC16,WWOX
TCGA-A2-A0T7-01	FMN2,GUCY1B3,NSD1,PIK3CA
TCGA-A8-A075-01	COL1A1,GUCY1B3,MACF1,MED1,MUC16,PIK3CA,TP53,WWOX
TCGA-AO-A0JG-01	GATA3,INTS4,MED1,PIK3R1
TCGA-AR-A0TP-01	AGAP1,HECTD1,MUC16,SCN2A,SIRPB1,TP53
TCGA-AR-A0TQ-01	DNAH8,GATA3,NCOA3,PIK3R1,RIMS1
TCGA-AR-A0TR-01	DPP6,NELL2,PIK3CA
TCGA-AR-A0TT-01	MED1,RYR2
TCGA-AR-A0TV-01	TP53
TCGA-AR-A0TW-01	ARID2,GATA3,MED1,WWOX
TCGA-AR-A0TX-01	ALCAM,ARID2,MUC16,PPP2R3A,PTPRD,TP53,WWOX
TCGA-AR-A0TZ-01	CES1,DSPP,PIK3CA,WWOX
TCGA-B6-A0RL-01	CCND1,FGFR1,NSD1
TCGA-B6-A0RM-01	GUCY1B3,MAP3K1
TCGA-B6-A0RN-01	CES1,MED1,PIK3CA
TCGA-B6-A0RO-01	PIK3CA,RYR2,SYNJ2
TCGA-B6-A0RP-01	CDH13,CES1,DPP6,MUC12,MUC16,PIK3CA
TCGA-B6-A0RS-01	ARID2,GUCY1B3,MUC16,TP53,UBE3A
TCGA-B6-A0RT-01	SIRPB1,WWOX
TCGA-B6-A0RU-01	RPGR,TP53
TCGA-B6-A0RV-01	ARID2,MED1
TCGA-BH-A0BC-01	DPP10,PIK3CA,TP53
TCGA-BH-A0DH-01	CBX8,MUC12
TCGA-BH-A0DQ-01	WWOX
TCGA-BH-A0HI-01	MED1,MUC12,NRXN2,PIK3CA
TCGA-BH-A0HN-01	CDH13,GPR98,PIK3CA,PTPRD
TCGA-BH-A0HP-01	CDH1,DSPP,GATA3,MUC12,PTEN,TRIP12,WWOX
TCGA-BH-A0RX-01	KCNQ5,TP53
TCGA-A2-A04R-01	FMN1
TCGA-A2-A0YC-01	PIK3CA
TCGA-A2-A0YD-01	CDH1,MAP3K1
TCGA-A2-A0YE-01	MDGA2,TP53
TCGA-A2-A0YF-01	MAP3K1
TCGA-A2-A0YG-01	ACACA,NSD1,TP53
TCGA-A2-A0YH-01	GUCY1B3,PIK3CA,TP53
TCGA-A2-A0YJ-01	GALNTL6,TP53
TCGA-A2-A0YK-01	AHNAK,CDH1,MAP3K1,PIK3CA,RPGR
TCGA-A2-A0YL-01	PIK3CA
TCGA-A2-A0YM-01	ATAD5,HECTD1,NSD1,TP53,WWOX
TCGA-A2-A0YT-01	PIK3CA,TP53
TCGA-AN-A0XN-01	MACF1,TP53,USP9X
TCGA-AN-A0XO-01	MUC12,PIK3CA
TCGA-AN-A0XP-01	PIK3CA
TCGA-AN-A0XR-01	GATA3
TCGA-AN-A0XS-01	MAP3K1,PIK3CA,PTPRM,WWOX
TCGA-AN-A0XT-01	GALNTL6,TP53
TCGA-AN-A0XU-01	KATNAL1,PTPRM,RBMX,TP53
TCGA-AN-A0XV-01	INADL
TCGA-AN-A0XW-01	APOB,COL14A1,DNAH6,INTS4,PTEN,RYR2
TCGA-AR-A0TU-01	RPGR
TCGA-AR-A0U0-01	ARID2,DNAH8,GALNTL6,MST1,PIK3R1,TP53
TCGA-AR-A0U2-01	CDH13,CHL1,DPP10,GATA3,GPR98,TP53
TCGA-AR-A0U3-01	CECR2,FGFR1,MGAM,NSD1,TP53
TCGA-AR-A0U4-01	MUC16,NSD1,TP53
TCGA-B6-A0WT-01	COL14A1,NSD1,PTEN,WWOX
TCGA-B6-A0WV-01	GATA3,NSD1
TCGA-B6-A0WW-01	CCND1,CDH13,MUC5B,PIK3CA,PTEN,PTPRM,SHANK2
TCGA-B6-A0WX-01	GALNTL6,NRXN2,TP53
TCGA-B6-A0WY-01	MST1,PIK3CA
TCGA-B6-A0WZ-01	DPP6,GPR98
TCGA-B6-A0X1-01	GUCY1B3,TP53
TCGA-B6-A0X4-01	CHL1,GATA3,MUC16
TCGA-B6-A0X5-01	MST1,PIK3CA
TCGA-BH-A0W3-01	PIK3CA
TCGA-BH-A0W4-01	GUCY1B3,MED1
TCGA-BH-A0W5-01	MAP3K1,PIK3CA,WWOX
TCGA-BH-A0WA-01	AGAP1,LCT,NCOA3,TP53,WWOX
TCGA-A2-A0YI-01	PIK3CA
TCGA-AN-A0XL-01	CHL1,PIK3CA,WWOX
TCGA-AO-A03M-01	ACACA,ATP2B1,CNOT1,CNTN1,GPR98,MGAM,NSD1,PIK3CA,RPGR,SCN2A,USP32
TCGA-AO-A03N-01	PIK3CA,TP53
TCGA-AO-A03U-01	ARID2,GPR98
TCGA-AO-A124-01	APOB,BRCA2,LRRK1,MUC16,RYR2,SMARCA2,TP53
TCGA-AO-A125-01	PIK3CA,THBS3
TCGA-AO-A126-01	PIK3CA
TCGA-AO-A128-01	ACACA,AHNAK,APOB,CDH1,COL14A1,DMXL2,GPR98,LRRK1,MUC16,NRXN2,SPAG17,TP53,TRIO,WWOX
TCGA-AO-A129-01	ARID2,MED1,SCN2A,TP53
TCGA-AO-A12B-01	USP32
TCGA-AO-A12E-01	ANK2,BRCA2,CDH1,MACF1,MGAM,MUC12
TCGA-AO-A12G-01	CHL1,PTEN,TP53
TCGA-AQ-A04H-01	GATA3,RPGR,RYR2,TP53,WWOX
TCGA-AQ-A04L-01	ATAD5,CDH1,DSPP,TP53
TCGA-B6-A0X7-01	PIK3CA,USP9X
TCGA-E2-A105-01	PIK3CA
TCGA-E2-A107-01	RPGR
TCGA-E2-A108-01	TP53
TCGA-E2-A109-01	DMD,RPGR,TP53
TCGA-E2-A10B-01	PIK3CA
TCGA-E2-A10C-01	ATAD5,CHL1,CNGB1,MST1,MUC16,PIK3CA,RYR2,SIRPB1
TCGA-E2-A10E-01	NRXN2
TCGA-E2-A10F-01	CDH1,PIK3CA
TCGA-A1-A0SD-01	COL14A1,GATA3,LRBA,NCOA3
TCGA-A2-A04N-01	MAP3K1,MUC16,PIK3CA,SCN2A
TCGA-A2-A04U-01	DPP6,FMN1,TP53
TCGA-A2-A04W-01	GUCY1B3,PIK3CA,RYR2,TP53
TCGA-A2-A0CL-01	MED1,SCN2A
TCGA-A2-A0CS-01	PIK3CA,PTEN
TCGA-A2-A0CV-01	AHNAK,GATA3,LRBA,SLC25A17
TCGA-A2-A0CW-01	CDK12,CNOT1,MUC12,PIK3CA,RYR2,TP53
TCGA-A2-A0D3-01	GATA3,PIK3CA
TCGA-A2-A0ES-01	DNAH8
TCGA-A2-A0EW-01	CDH1,PIK3CA
TCGA-A2-A0T3-01	CCND1,MUC16,NRXN2,NSD1,SHANK2,SIRPB1,TP53
TCGA-A7-A0DA-01	AGAP1,CNTN1,KCNQ5,SPAG17,TP53
TCGA-AO-A03V-01	TP53
TCGA-AO-A12A-01	AGAP1,GATA3,MUC12,PIK3CA
TCGA-AO-A12D-01	ACACA,TP53
TCGA-AO-A12F-01	NSD1
TCGA-AO-A12H-01	USP9X
TCGA-AR-A0TS-01	ARID2,MGAM,PIK3C2B,TP53
TCGA-AR-A0TY-01	CHL1,GATA3,MUC5B,USP32
TCGA-B6-A0IH-01	CDH1,KCNQ5,LCT
TCGA-B6-A0RH-01	DTNB,PIK3CA,SMARCA2,TP53
TCGA-B6-A0RQ-01	CDH1,PIK3CA,RSRC1
TCGA-B6-A0WS-01	GATA3,LRBA,MED1
TCGA-B6-A0X0-01	GATA3
TCGA-BH-A0AV-01	TP53
TCGA-BH-A0B0-01	MUC16,PIK3CA,SLC25A17,TP53
TCGA-BH-A0B7-01	DSPP,MED1,TP53
TCGA-BH-A0BG-01	GUCY1B3,KDM4C,RBMX,TP53
TCGA-BH-A0BL-01	KCNQ5,MUC5B,RYR2,TP53
TCGA-BH-A0BP-01	ALCAM,CCND1,MUC16,NELL2,TP53
TCGA-BH-A0BQ-01	ALCAM
TCGA-BH-A0BR-01	FMN2,GATA3,PTPRD,TP53
TCGA-BH-A0BW-01	MED1,RPGR
TCGA-BH-A0C7-01	CNGB1,GATA3
TCGA-BH-A0DE-01	ARID2,PIK3CA
TCGA-BH-A0DL-01	CNOT1,KCNQ5,PIK3CA,TP53
TCGA-BH-A0DX-01	PIK3CA
TCGA-BH-A0E9-01	CDH1,INTS4,PTEN
TCGA-BH-A0EA-01	COL14A1,GATA3,PIK3CA,WWOX
TCGA-BH-A0EI-01	DSPP
TCGA-BH-A0H5-01	APBA1,PTEN
TCGA-BH-A0W7-01	AHNAK,DPP6,PIK3CA
TCGA-C8-A12K-01	CHL1,RPGR,TP53
TCGA-C8-A12L-01	ALCAM,PIK3CA,TP53
TCGA-C8-A12M-01	GATA3
TCGA-C8-A12N-01	MAP3K1,PIK3CA
TCGA-C8-A12O-01	ATP2B1,NSD1,RSRC1,TP53
TCGA-C8-A12P-01	ACACA,AKAP6,ROCK1,TP53
TCGA-C8-A12Q-01	GPR98,TP53
TCGA-C8-A12T-01	BRCA2,MACF1,PIK3CA,TBC1D5,TP53
TCGA-C8-A12U-01	GATA3,PIK3CA
TCGA-C8-A12V-01	THBS3
TCGA-C8-A12W-01	CDK12,TP53
TCGA-C8-A12X-01	FGFR1,RSRC1
TCGA-C8-A12Z-01	AGAP1,PIK3R1,TP53
TCGA-C8-A130-01	CHL1,GALNTL6,NOX4,PIK3CA,TP53
TCGA-C8-A131-01	AKAP6,KDM4C,PIK3CA,PTPRD,TP53
TCGA-C8-A132-01	COL1A1
TCGA-C8-A134-01	SPAG17,TP53
TCGA-C8-A135-01	COL1A1,PIK3R1,TP53
TCGA-C8-A137-01	NSD1
TCGA-C8-A138-01	CES1,GATA3,LRBA,PTPRM,SHANK2,TP53
TCGA-D8-A13Y-01	CDC16,MUC5B,TP53
TCGA-D8-A13Z-01	NOX4,PTEN,TP53,UBE3A,WWOX
TCGA-D8-A140-01	GATA3,MED1,NCOA3,NSD1,WWOX
TCGA-D8-A141-01	NELL2
TCGA-D8-A142-01	MUC5B,TP53
TCGA-D8-A143-01	APOB,GUCY1B3,MUC12,PIK3CA,TP53
TCGA-D8-A145-01	CECR2
TCGA-D8-A146-01	PIK3CA
TCGA-D8-A147-01	GALNTL6,RSRC1,TP53
TCGA-E2-A10A-01	COL1A1,GATA3,MACF1,MAP3K1,MGAM,WWOX
TCGA-E2-A14O-01	COL1A1,INADL,PTPRD
TCGA-E2-A14R-01	KSR1,TP53
TCGA-E2-A14T-01	GATA3,NSD1
TCGA-E2-A14X-01	GUCY1B3,TP53
TCGA-E2-A14Z-01	GPR98,PTEN,RSRC1,TP53
TCGA-E2-A154-01	DMD,PIK3CA
TCGA-E2-A159-01	APOB,GALNTL6,MACF1,MED1,SLC25A17,TP53,TRIO
TCGA-E2-A15D-01	CNOT1,GATA3
TCGA-E2-A15F-01	FGFR1,RIMS1
TCGA-E2-A15O-01	CCND1,MAP3K1,WWOX
TCGA-E2-A15P-01	PIK3CA
TCGA-E2-A15R-01	CCND1,FGFR1,OTUD4,WWOX
TCGA-E2-A15S-01	GPR98,SCN2A
TCGA-E2-A15T-01	FMN2,GALNTL6
TCGA-AR-A1AH-01	ARID2,MUC16,TP53,UBE3A
TCGA-BH-A0BO-01	MAP3K1,PIK3CA
TCGA-BH-A0C1-01	CDH1,INADL
TCGA-BH-A0DO-01	MED1,PIK3CA
TCGA-BH-A0DT-01	DNAH6,GATA3,LRBA,MAP3K1,PIK3CA
TCGA-BH-A18F-01	CDH1,DPP6,PIK3CA
TCGA-BH-A18G-01	ANK2,ARHGAP26,ATP2B1,CNOT1,DNAH6,FMN1,GPR98,MAP3K1,MDGA2,MUC16,MUC5B,NRXN2,SHANK2,SYNJ2,USP32,USP9X
TCGA-BH-A18H-01	DMD,PIK3CA,TP53
TCGA-BH-A18I-01	CCND1,LCT,PIK3CA,SHANK2
TCGA-BH-A18J-01	NELL2,PIK3CA
TCGA-BH-A18K-01	AKAP6,PIK3R1
TCGA-BH-A18L-01	CES1,GUCY1B3,SLC25A17
TCGA-BH-A18M-01	GATA3,MAP3K1,NSD1,PIK3CA
TCGA-BH-A18N-01	CES1,MAP3K1,MDGA2,MGAM
TCGA-BH-A18P-01	APOB,ATAD5,CDH1,MAP3K1,MUC16,PIK3R1
TCGA-BH-A18Q-01	CECR2,MUC12,TP53
TCGA-BH-A18R-01	INTS4
TCGA-BH-A18S-01	WWOX
TCGA-BH-A18T-01	APOB,CDH13,GUCY1B3,KATNAL1,TP53,WWOX
TCGA-BH-A18U-01	FGFR1,GUCY1B3,SMARCA2,TP53,USP9X
TCGA-BH-A18V-01	ALCAM,APOB,PHF12,SYNJ2,TP53
TCGA-C8-A12Y-01	MED1,PIK3CA,RSRC1
TCGA-C8-A133-01	APOB,CNTN1,GATA3,GUCY1B3,MUC12,PIK3CA
TCGA-E2-A14P-01	MUC12,PIK3CA,PTPRM,TP53
TCGA-E2-A14Q-01	MED1,PIK3R1,RYR2,WWOX
TCGA-E2-A14S-01	AHNAK,PIK3R1
TCGA-E2-A14V-01	KSR1,MED1,PIK3CA
TCGA-E2-A14W-01	BRCA2,INADL,PPP2R3A
TCGA-E2-A14Y-01	MED1,PIK3CA,TP53
TCGA-E2-A150-01	DPP6,MED1,SLC25A17,TP53
TCGA-E2-A152-01	GALNTL6,ITGA2,SMARCA2,THBS3,TP53,WWOX
TCGA-E2-A153-01	ARID2,PIK3CA
TCGA-E2-A155-01	GATA3,MED1,RYR2,TP53
TCGA-E2-A156-01	DSPP,FMN1,MAP3K1,PIK3CA,WWOX
TCGA-E2-A158-01	GALNTL6,TP53
TCGA-E2-A15A-01	GPR98,PTPRD
TCGA-E2-A15C-01	MAP3K1,PIK3CA,PTPRD
TCGA-E2-A15E-01	PIK3CA,TP53
TCGA-E2-A15G-01	MAP3K1,MED1,PIK3CA
TCGA-E2-A15H-01	CBX8,GATA3,GUCY1B3,NSD1
TCGA-E2-A15L-01	NSD1,PIK3CA,RYR2
TCGA-E2-A15M-01	DMD,MUC16,TP53
TCGA-BH-A18V-06	ARID2,SYNJ2
TCGA-E2-A15A-06	GPR98,PTPRD,SHANK2
TCGA-E2-A15E-06	PIK3CA,TP53
TCGA-A7-A13D-01	DNAH6,MACF1,TBC1D5,TP53
TCGA-A7-A13E-01	ARID2,GPR98,MACF1,TP53
TCGA-A7-A13F-01	DSPP
TCGA-AR-A1AI-01	BRCA2,DMXL2,TP53
TCGA-AR-A1AJ-01	MUC12,PTEN,TP53
TCGA-AR-A1AK-01	TRIO,UBE3A
TCGA-AR-A1AL-01	CDH1,PIK3CA
TCGA-AR-A1AN-01	TP53
TCGA-AR-A1AO-01	RPGR
TCGA-AR-A1AP-01	GATA3,MUC12,SLC25A17,TP53
TCGA-AR-A1AQ-01	PPP2R3A,TP53
TCGA-AR-A1AS-01	PIK3CA,RYR2,TP53
TCGA-AR-A1AT-01	CDH1
TCGA-AR-A1AU-01	SPAG17
TCGA-AR-A1AV-01	ARID2,GATA3,LRBA,PIK3CA,RPGR
TCGA-AR-A1AW-01	GNAS,PIK3CA,TP53
TCGA-AR-A1AX-01	ARHGAP26,DMD
TCGA-AR-A1AY-01	TP53
TCGA-BH-A0AU-01	INADL
TCGA-BH-A0AZ-01	GATA3,MUC16
TCGA-BH-A0B5-01	PIK3CA
TCGA-BH-A0BF-01	PIK3CA,PPP2R3A,RPGR,TP53
TCGA-BH-A0BS-01	GATA3
TCGA-BH-A0BT-01	PIK3CA,RYR2,TP53
TCGA-BH-A0BZ-01	APOB,DMD,PTPRM,RYR2,SPAG17
TCGA-BH-A0C3-01	TP53
TCGA-BH-A0DD-01	ACACA,CCND1,CDC16,E2F3,MUC12,PIK3CA
TCGA-BH-A0DG-01	GATA3,NSD1
TCGA-BH-A0DI-01	ARID2,CNTN1,PIK3R1,TP53
TCGA-BH-A0DV-01	MAP3K1,PIK3CA
TCGA-BH-A0H3-01	GATA3,PIK3CA,SLC25A17
TCGA-BH-A0HA-01	CHL1,LCT,MUC5B,PIK3CA,RPGR
TCGA-E2-A15J-01	GATA3,SLC25A17
TCGA-E2-A15K-01	DMD,GUCY1B3,MUC12,PIK3CA
TCGA-E2-A1AZ-01	AGAP1,SHANK2
TCGA-E2-A1B0-01	ACACA,TP53
TCGA-E2-A1B1-01	ATP2B1
TCGA-E2-A1B4-01	MAP3K1,PIK3CA,SMARCA2
TCGA-E2-A1B5-01	GATA3
TCGA-E2-A1B6-01	RYR2,TP53
TCGA-E2-A1BC-01	PIK3CA
TCGA-E2-A1BD-01	MAP3K1,MUC5B,PIK3CA
TCGA-E2-A15K-06	GNAS,GUCY1B3,MUC12,PIK3CA
TCGA-AR-A1AR-01	MDGA2,TP53
TCGA-BH-A1EO-01	KCNQ5
TCGA-BH-A1ES-01	FDFT1,FGFR1,GALNTL6
TCGA-BH-A1ET-01	GALNTL6,PIK3CA
TCGA-BH-A1EU-01	PIK3CA
TCGA-BH-A1EV-01	AKAP6,GUCY1B3,KSR1,LRBA,SHANK2,TP53
TCGA-BH-A1EW-01	SLC34A1
TCGA-BH-A1F0-01	GALNTL6,TP53,WWOX
TCGA-C8-A1HF-01	PIK3CA,TP53
TCGA-C8-A1HG-01	PPP2R3A,TP53
TCGA-C8-A1HI-01	GATA3,PPP2R3A,USP32
TCGA-C8-A1HL-01	GATA3,SIRPB1,SPAG17
TCGA-C8-A1HM-01	APOB,DMD,MUC16,RIMS1,TP53
TCGA-C8-A1HN-01	FMN1,GATA3,GUCY1B3,PPP2R3A
TCGA-E2-A14N-01	MGAM,TP53
TCGA-E2-A15I-01	CDH13,DNAH6
TCGA-BH-A1ES-06	ARID2,FGFR1,RBMX
TCGA-A2-A1FV-01	CDH1,DSPP,NCOA3,USP9X
TCGA-A2-A1FW-01	HECTD1,NELL2,SIRPB1
TCGA-A2-A1FX-01	PIK3C2B
TCGA-A2-A1G0-01	CDH1,PIK3CA,RBMX,TP53
TCGA-A2-A1G1-01	ACACA,MAP3K1,TP53
TCGA-A2-A1G4-01	CDH13,DMD,GUCY1B3
TCGA-A2-A1G6-01	ARID2
TCGA-A7-A13G-01	AKAP6,ARHGAP26,DMD,DPP6,LRBA,MED1,MUC12,NSD1,PIK3CA,PTPRD,PTPRM
TCGA-AO-A1KO-01	AKAP6,MGAM,NCOA3,RSRC1
TCGA-AO-A1KP-01	CES1,FGFR1,WWOX
TCGA-AO-A1KQ-01	DMD
TCGA-AO-A1KS-01	CDH1,MED1
TCGA-AO-A1KT-01	ARID2,CCND1,DMD,FDFT1,FGFR1,GNAS,INTS4
TCGA-AQ-A1H2-01	PIK3CA
TCGA-AQ-A1H3-01	MUC12
TCGA-B6-A1KC-01	FGFR1,GUCY1B3,KCNQ5
TCGA-B6-A1KF-01	ACACA,PIK3R1,RYR2,SHANK2,TP53,USP32
TCGA-B6-A1KN-01	MED1,PPP2R3A,TP53
TCGA-BH-A1EN-01	INTS4,NSD1,WWOX
TCGA-BH-A1EX-01	ARID2,FMN2,MAP3K1
TCGA-BH-A1EY-01	INADL,MACF1,MUC12,PIK3CA,TP53
TCGA-BH-A1F2-01	MUC12,TP53,USP32
TCGA-BH-A1F5-01	CNOT1,MAP3K1,MUC12
TCGA-BH-A1F6-01	ARID2,NCOA3,TP53
TCGA-BH-A1F8-01	DPP6,FGFR1,MUC16,MUC5B,OTUD4,PIK3CA,PTEN,PTPRD
TCGA-BH-A1FB-01	ATAD5
TCGA-BH-A1FC-01	PAPOLA,TP53
TCGA-BH-A1FD-01	GUCY1B3,PIK3R1,RYR2,TP53
TCGA-BH-A1FE-01	MST1,PIK3CA,TP53
TCGA-BH-A1FG-01	CES1,GPR98,MAP3K1,MUC12,TRIP12,USP32
TCGA-BH-A1FH-01	GATA3,MUC12,RPGR
TCGA-BH-A1FJ-01	CDK12,GUCY1B3,MUC16
TCGA-BH-A1FL-01	DMD,DSPP,KCNQ5
TCGA-BH-A1FM-01	SMARCA2
TCGA-BH-A1FN-01	DMD,DSPP,MACF1,MUC12,NRXN2,PTEN,TP53
TCGA-BH-A1FR-01	DSPP,RBMX,WWOX
TCGA-C8-A1HE-01	DSPP,GUCY1B3,PIK3CA
TCGA-C8-A1HJ-01	HECTD1,MUC12,TP53
TCGA-C8-A1HK-01	AHNAK,CCND1,CHL1,GUCY1B3,TP53
TCGA-C8-A1HO-01	CDH1,FGFR1,GATA3,GUCY1B3
TCGA-D8-A1J8-01	ANK2,APBA1,CATSPERG,CNOT1,GATA3,INADL,MUC12,PIK3CA,PTEN,RYR2
TCGA-D8-A1J9-01	ACACA,GPR98,MACF1,TP53
TCGA-D8-A1JA-01	AKAP6,ANK2,APBA1,CNOT1,CNTN1,DMD,DMXL2,MUC16,OTUD4,PHF12,RIMS1,RYR2,TBC1D5
TCGA-D8-A1JB-01	NCOA3
TCGA-D8-A1JC-01	CES1,INADL,NSD1,RPGR,WWOX
TCGA-D8-A1JD-01	NSD1,PIK3CA,RBMX
TCGA-D8-A1JE-01	GPR98,PIK3CA
TCGA-D8-A1JF-01	DSPP,NSD1,PIK3CA,RBMX,SCN2A,TP53
TCGA-D8-A1JG-01	INADL,PIK3CA,TP53
TCGA-D8-A1JH-01	MAP3K1,NCOA3,PIK3CA,RBMX
TCGA-D8-A1JI-01	MUC12,PTEN
TCGA-D8-A1JK-01	ALCAM,KDM4C,PIK3CA,TP53
TCGA-D8-A1JL-01	SCN2A,TP53
TCGA-D8-A1JM-01	MUC12,TP53
TCGA-D8-A1JN-01	CDH1,CDH13,GATA3,MDGA2,MUC16,PIK3CA,WWOX
TCGA-D8-A1JP-01	BRCA2,DSPP,GUCY1B3,MUC12,PIK3CA
TCGA-D8-A1JS-01	ARID2,MUC12,MUC16,PIK3CA
TCGA-D8-A1JT-01	CES1,GATA3,MUC16
TCGA-D8-A1JU-01	MAP3K1,PIK3CA,WWOX
TCGA-E2-A1IE-01	MUC16,NCOA3
TCGA-E2-A1IH-01	CDH1,DMXL2,PTEN,WWOX
TCGA-E2-A1IN-01	CNTN1,PIK3CA,TP53
TCGA-E2-A1L6-01	PIK3CA
TCGA-E2-A1L8-01	ATAD5,CDH1,MGAM,PIK3CA,SMARCA2
TCGA-E2-A1L9-01	DSPP,GATA3
TCGA-EW-A1IW-01	MUC16,MUC5B,NRXN2,PIK3CA,RYR2,SPAG17
TCGA-EW-A1IY-01	DPP6,DSPP,NSD1
TCGA-EW-A1IZ-01	APOB,GPR98,MUC12,MUC5B,PHF12,PIK3CA,PPP2R3A,ROCK1
TCGA-EW-A1J1-01	DSPP,GUCY1B3,MAP3K1,NCOA3,NSD1,PIK3CA
TCGA-EW-A1J2-01	CDH1,LCT,PIK3CA
TCGA-EW-A1J3-01	CDH1,NSD1,USP32
TCGA-EW-A1J5-01	APOB,CDH1,LRRK1,MUC16,PIK3CA,PIK3R1,RYR2,SPAG17,USP9X
TCGA-EW-A1J6-01	DSPP
TCGA-BH-A1FE-06	MST1
TCGA-A1-A0SB-01	DTNB
TCGA-A1-A0SF-01	CECR2,GUCY1B3,MUC16,MUC5B
TCGA-A1-A0SG-01	AKAP6,CECR2,CES1,MAP3K1,WWOX
TCGA-A1-A0SI-01	DMD,DPP10,FDFT1,PIK3CA,TP53
TCGA-A1-A0SN-01	MUC5B,USP32
TCGA-A1-A0SQ-01	GATA3,INTS4,MUC12,NOX4,USP32
TCGA-AO-A1KR-01	MED1,PIK3CA
TCGA-E2-A1IF-01	APBA1,PIK3CA
TCGA-E2-A1IG-01	SHANK2,WWOX
TCGA-E2-A1II-01	MED1,TP53,WWOX
TCGA-E2-A1IJ-01	CDH1,SLC25A17
TCGA-E2-A1IK-01	MACF1
TCGA-E2-A1IO-01	DMXL2,PIK3CA,TP53
TCGA-E2-A1L7-01	KDM4C,TP53
TCGA-E2-A1LA-01	CECR2,PPP2R3A
TCGA-E2-A1LB-01	CHL1,PIK3C2B
TCGA-E2-A1LL-01	PIK3R1,PTEN
TCGA-E9-A1N6-01	ACACA
TCGA-E9-A1N8-01	CHL1,DMD,INTS4,NOX4,SLC25A17,TP53
TCGA-E9-A1NA-01	GATA3,RIMS1
TCGA-E9-A1ND-01	MUC12,MUC5B,NSD1,TP53,TRIP12
TCGA-EW-A1IX-01	PIK3CA
TCGA-EW-A1OV-01	CECR2,MED1,MUC12,PIK3CA,PTEN
TCGA-EW-A1OW-01	COL14A1,THBS3
TCGA-EW-A1OX-01	GATA3,MUC5B
TCGA-EW-A1OY-01	MAP3K1,TP53
TCGA-EW-A1OZ-01	DTNB,MED1,NCOA3,PHF12,TP53
TCGA-EW-A1P0-01	PIK3CA,RSRC1
TCGA-EW-A1P3-01	CDH13,DNAH8,FMN2,GATA3,LCT,PTPRD
TCGA-EW-A1P4-01	ARID2,DMXL2,KDM4C,MED1,NRXN2,RYR2,TP53
TCGA-EW-A1P5-01	GUCY1B3,PIK3CA
TCGA-EW-A1P6-01	MAP3K1
TCGA-EW-A1P7-01	MUC12
TCGA-EW-A1P8-01	HECTD1
TCGA-EW-A1PA-01	GNAS,TP53
TCGA-EW-A1PB-01	MUC5B,TBC1D5,TP53
TCGA-EW-A1PD-01	CDK12,KSR1
TCGA-EW-A1PE-01	BRCA2,PIK3CA
TCGA-EW-A1PF-01	PPP2R3A
TCGA-EW-A1PG-01	NCOA3
TCGA-A2-A1FZ-01	PIK3CA
TCGA-BH-A1FU-01	DNAH8,TP53
TCGA-D8-A1X5-01	APOB,FMN2,TP53
TCGA-D8-A1XA-01	MAP3K1,TP53
TCGA-D8-A1XB-01	MAP3K1,PIK3CA,RSRC1
TCGA-D8-A1XC-01	MUC16,NCOA3
TCGA-D8-A1XD-01	KATNAL1
TCGA-D8-A1XF-01	CHL1,MACF1,MED1,MUC16
TCGA-D8-A1XG-01	DSPP,MUC12
TCGA-E2-A1IL-01	FMN2,PIK3CA,SLC25A17
TCGA-E2-A1IU-01	PIK3C2B,PIK3R1
TCGA-E2-A1LH-01	AKAP6,INADL,MUC12,TP53
TCGA-E2-A1LK-01	RBMX,TP53
TCGA-E9-A1N5-01	DMD,PIK3CA,TP53
TCGA-E9-A1N9-01	DSPP,MACF1,MAP3K1,NCOA3,SHANK2,TP53
TCGA-E9-A1NF-01	FMN2,TP53
TCGA-E9-A1NH-01	CDK12,GATA3,PIK3CA
TCGA-E9-A1NI-01	CECR2,GATA3,PIK3CA,RBMX,SPAG17
TCGA-E9-A1R2-01	FGFR1,MUC12,PPP2R3A
TCGA-E9-A1R4-01	CHL1,DPP10,PIK3CA
TCGA-E9-A1R6-01	MAP3K1
TCGA-E9-A1RA-01	DMD,GATA3,NCOA3,PIK3CA
TCGA-E9-A1RG-01	ANK2
TCGA-AQ-A0Y5-01	MUC12,PIK3CA
TCGA-B6-A1KI-01	MAP3K1,PIK3CA
TCGA-BH-A201-01	INTS4
TCGA-BH-A202-01	ACACA,PIK3CA,TP53
TCGA-D8-A1JJ-01	CHL1,GATA3,MACF1,NCOA3,PIK3CA,TP53
TCGA-D8-A1X6-01	GATA3,KDM4C,MAP3K1,PPP2R3A
TCGA-D8-A1X7-01	USP9X
TCGA-D8-A1X8-01	CDH1
TCGA-D8-A1XJ-01	ACACA,RYR2,SIRPB1,TP53
TCGA-D8-A1XK-01	AGAP1,AHNAK,ANK2,APOB,DMD,DNAH8,DPP6,FGFR1,KDM4C,LRRK1,MUC16,NSD1,PIK3R1,RYR2
TCGA-D8-A1XL-01	COL14A1,MDGA2,PIK3CA,TP53
TCGA-D8-A1XM-01	PIK3CA
TCGA-D8-A1XO-01	CDH1,GUCY1B3,PIK3CA
TCGA-D8-A1XQ-01	ANK2,CBX8,CECR2,CNOT1,GALNTL6,GPR98,MED1,NRXN2,PIK3R1,SLC34A1,SPAG17,SYNJ2,TP53
TCGA-D8-A1XR-01	NCOA3
TCGA-D8-A1XS-01	PIK3CA,WWOX
TCGA-D8-A1XT-01	NCOA3,RBMX,SLC25A17,TP53
TCGA-D8-A1XU-01	DPP6,MUC12
TCGA-D8-A1XV-01	MUC12
TCGA-D8-A1XW-01	CECR2,MED1,TP53
TCGA-D8-A1XY-01	MGAM,PIK3CA
TCGA-D8-A1XZ-01	DMXL2,MED1,TP53
TCGA-D8-A1Y0-01	MUC5B,NCOA3
TCGA-D8-A1Y1-01	ANK2,CDH1,GUCY1B3,LCT,MUC12,PIK3CA
TCGA-E2-A1LG-01	CDH1,CDK12,MUC5B,RBMX,TP53
TCGA-E9-A1N4-01	MAP3K1,NSD1,SMARCA2,WWOX
TCGA-E9-A1NE-01	NSD1
TCGA-E9-A1NG-01	PIK3CA
TCGA-E9-A1R3-01	COL14A1,MUC16,PIK3CA
TCGA-E9-A1R5-01	DMD,PIK3CA,PPP2R3A
TCGA-E9-A1R7-01	GATA3,MUC5B
TCGA-EW-A1PH-01	GUCY1B3,RYR2,TP53
TCGA-AC-A23E-01	MED1,PIK3CA
TCGA-BH-A204-01	CDK12,FGFR1,MUC12
TCGA-BH-A208-01	MGAM,PIK3CA,TP53
TCGA-BH-A209-01	AHNAK,CDH1,MUC16
TCGA-D8-A1X9-01	LCT,WWOX
TCGA-D8-A1Y2-01	MED1,PIK3CA
TCGA-D8-A1Y3-01	MUC12,TP53
TCGA-E2-A1LI-01	CDH13
TCGA-E2-A1LS-01	GUCY1B3,TP53
TCGA-E9-A1N3-01	GATA3
TCGA-E9-A1NC-01	DMXL2,NRXN2,TRIP12
TCGA-E9-A1RB-01	TP53,WWOX
TCGA-E9-A1RC-01	GATA3,MACF1,MUC12,PIK3CA,WWOX
TCGA-E9-A1RD-01	MAP3K1,NSD1,PIK3CA,SCN2A
TCGA-E9-A1RE-01	COL14A1,DMD,NOX4,PIK3CA,PTPRD,RPGR
TCGA-E9-A1RF-01	ARID2,DPP10,FMN2,GATA3,MUC5B,NCOA3,USP9X
TCGA-E9-A226-01	MUC5B,PIK3CA,TP53
TCGA-E9-A227-01	GPR98,PIK3CA,WWOX
TCGA-E9-A228-01	FGFR1,GALNTL6,INTS4,MED1,MUC16,USP32
TCGA-E9-A229-01	DPP6,DSPP,GALNTL6,PIK3CA,WWOX
TCGA-E9-A22A-01	ANK2
TCGA-E9-A22B-01	ARID2,CNTN1,MGAM,WWOX
TCGA-E9-A22D-01	DSPP,GATA3
TCGA-E9-A22E-01	APBA1,COL14A1,DSPP,GPR98,MAP3K1,RSRC1
TCGA-E9-A22G-01	SIRPB1,TP53
TCGA-E9-A22H-01	MAP3K1
TCGA-A2-A25B-01	APOB,GATA3,RYR2
TCGA-A2-A25C-01	NRXN2,PIK3CA
TCGA-A2-A25E-01	ROCK1
TCGA-A2-A25F-01	BRCA2
TCGA-A7-A26E-01	ACACA,DPP6,GUCY1B3,MED1,PIK3CA,USP32
TCGA-A7-A26F-01	COL14A1,DPP10,DPP6,MUC12,PIK3R1,PTEN,SMARCA2,TP53
TCGA-A7-A26G-01	CDK12,DMXL2,DSPP,NSD1,PTEN,ROCK1,TP53
TCGA-A7-A26H-01	GABBR2,NCOA3,PIK3CA
TCGA-A7-A26I-01	MUC12,TP53,UBE3A
TCGA-A7-A26J-01	ANK2,CHL1,DPP10,MED1,NSD1,RYR2,SIRPB1,USP9X,WWOX
TCGA-AC-A23C-01	PIK3CA,PTEN,TP53,TRIO
TCGA-AR-A24H-01	AKAP6,APOB,CDH1,MUC5B
TCGA-AR-A24K-01	CHL1,GUCY1B3,MUC12,MUC5B,PIK3CA,SLC25A17,TP53
TCGA-AR-A24L-01	APOB
TCGA-AR-A24M-01	PIK3CA,PIK3R1
TCGA-AR-A24N-01	GATA3
TCGA-AR-A24O-01	PIK3CA
TCGA-AR-A24P-01	TP53
TCGA-AR-A24Q-01	PTEN,SCN2A,TP53
TCGA-AR-A24R-01	CNOT1,PTPRD
TCGA-AR-A24S-01	CHL1,MUC16,PIK3CA,TP53
TCGA-AR-A24T-01	CDH1,PIK3CA,TP53,USP32
TCGA-AR-A24U-01	ARID2
TCGA-AR-A24V-01	CHL1,MGAM,NCOA3
TCGA-AR-A24W-01	PTEN
TCGA-AR-A24X-01	CDH1,GATA3,MUC5B,RPGR
TCGA-AR-A24Z-01	NSD1,PTPRD
TCGA-AR-A250-01	CDK12,COL1A1
TCGA-AR-A251-01	AHNAK,DNAH8,RBMX,SPAG17,TP53,TRIO,UBE3A
TCGA-AR-A252-01	GATA3,NCOA3,SLC25A17
TCGA-AR-A254-01	MUC12,TP53
TCGA-AR-A255-01	PIK3CA,RPGR,SCN2A
TCGA-AR-A256-01	LRRK1,MACF1,MUC16,PHF11,SYNJ2,TP53,USP32,WWOX
TCGA-BH-A203-01	COL14A1,MED1,PIK3CA,TP53
TCGA-C8-A278-01	PIK3CA,TP53
TCGA-C8-A27A-01	ALCAM,CECR2,DMD,FGFR1,TP53
TCGA-C8-A27B-01	CHL1,MUC16,SHANK2,TP53
TCGA-E9-A1QZ-01	PHF12
TCGA-E9-A1RH-01	CES1,GALNTL6,PIK3CA,TP53
TCGA-E9-A1RI-01	PIK3CA
TCGA-E9-A243-01	RPGR,TP53
TCGA-E9-A244-01	TP53,WWOX
TCGA-E9-A247-01	ANK2,CCND1,INTS4,SHANK2
TCGA-E9-A248-01	COL14A1,SLC25A17,TP53,WWOX
TCGA-E9-A249-01	GATA3,NSD1,PIK3CA,UBE3A
TCGA-E9-A24A-01	PPP2R3A,RBMX
TCGA-A2-A259-01	MAP3K1,NSD1
TCGA-A2-A25A-01	ATP2B1,CDH1,PIK3CA
TCGA-A2-A25D-01	GUCY1B3,MUC16,PIK3CA
TCGA-BH-A28Q-01	CDH1,GATA3
TCGA-C8-A26V-01	GATA3,RBMX,TP53
TCGA-C8-A26W-01	PIK3CA,TP53
TCGA-C8-A26X-01	FGFR1,PIK3CA,TP53
TCGA-C8-A26Y-01	ACACA,AGAP1,ANK2,ARHGAP26,ATAD5,CATSPERG,CHL1,DNAH8,GABBR2,HECTD1,NRXN2,PTEN,SMARCA2,USP32,USP9X
TCGA-C8-A26Z-01	INADL
TCGA-C8-A273-01	GATA3,SIRPB1,USP32
TCGA-C8-A274-01	CDH1,DMD,HECTD1,KCNQ5,NCOA3,NRXN2,PIK3CA
TCGA-C8-A275-01	DMD,KSR1,LCT,TP53,TRIO
TCGA-D8-A27E-01	OTUD4
TCGA-D8-A27F-01	CDH13,COL1A1,TP53
TCGA-D8-A27G-01	ACACA,ANK2,APOB,ARID2,ATP2B1,BRCA2,CDH1,DMXL2,DNAH6,DNAH8,FMN1,ITGA2,MACF1,MUC16,NCOA3,PIK3CA,PTPRD,RYR2,SHANK2,SMARCA2,TRIO
TCGA-D8-A27H-01	APBA1,LRBA,NCOA3,TP53
TCGA-D8-A27I-01	CDH1,RBMX,RYR2
TCGA-D8-A27K-01	GATA3,PIK3CA
TCGA-D8-A27L-01	MAP3K1,PIK3CA,PTEN
TCGA-D8-A27M-01	TP53
TCGA-D8-A27N-01	DSPP,MUC12,TP53,USP32
TCGA-D8-A27P-01	MACF1,MUC12,NSD1,PIK3CA
TCGA-D8-A27R-01	DSPP,MUC12
TCGA-D8-A27T-01	PIK3CA,SCN2A
TCGA-D8-A27W-01	SHANK2
TCGA-E9-A1R0-01	PIK3CA
TCGA-E9-A245-01	GATA3,GUCY1B3
TCGA-E9-A295-01	DMD,PIK3CA
TCGA-GI-A2C8-01	CDH1,HECTD1,LRBA,MUC12
TCGA-AC-A2B8-01	GUCY1B3,NSD1,PIK3CA
TCGA-AC-A2FB-01	CBX8
TCGA-AC-A2FF-01	CDH1,MAP3K1,PTEN
TCGA-AC-A2FG-01	CDH1,CES1
TCGA-D8-A27V-01	AGAP1,CDH1,NSD1,PTEN,RYR2,SCN2A
TCGA-EW-A2FS-01	WWOX
TCGA-EW-A2FV-01	NSD1,PIK3CA,SLC25A17
TCGA-EW-A2FW-01	GATA3,GNAS,INTS4
TCGA-AC-A2FK-01	NSD1,SLC25A17
TCGA-AC-A2FO-01	CDH1,KCNQ5,PIK3CA
TCGA-AR-A2LE-01	CDH1,CNOT1,DPP6,FMN2,LRBA,MUC16
TCGA-AR-A2LK-01	PIK3CA
TCGA-AR-A2LL-01	CDH1,NSD1,PTEN
TCGA-AR-A2LM-01	PIK3CA,WWOX
TCGA-E9-A2JS-01	CES1,MED1
TCGA-GM-A2DD-01	ANK2,CDH1,CDK12,INADL,PIK3CA,TP53
TCGA-GM-A2DF-01	DMD,TP53
TCGA-GM-A2DH-01	ARHGAP26,CES1,KATNAL1,MUC16,PIK3CA,PPP2R3A,TP53
TCGA-GM-A2DK-01	FMN1,SLC25A17
TCGA-GM-A2DM-01	GATA3,LCT
TCGA-GM-A2DN-01	FMN2,GATA3,INADL,MUC5B
TCGA-AC-A2QH-01	DMXL2,KDM4C,MUC12,RPGR,SIRPB1,TP53,WWOX
TCGA-AR-A2LH-01	RSRC1
TCGA-AR-A2LN-01	CDH1,NSD1
TCGA-AR-A2LO-01	RYR2
TCGA-AR-A2LQ-01	ARID2
TCGA-AR-A2LR-01	TP53
TCGA-B6-A2IU-01	ACACA,CDH1
TCGA-BH-A2L8-01	CDC16,CDH1,GATA3,GPR98,MACF1,MED1,MUC16,PARD3B,PIK3CA,PTEN
TCGA-E9-A2JT-01	CDH1
TCGA-GM-A2D9-01	ACACA,AKAP6,ATAD5,GNAS,KDM4C,MACF1,MUC16,PIK3C2B,PIK3CA
TCGA-GM-A2DA-01	GALNTL6
TCGA-GM-A2DB-01	ARID2,DMD,PTEN,RPGR,TP53,USP9X
TCGA-GM-A2DC-01	CDH13,COL14A1
TCGA-GM-A2DI-01	PIK3CA,TP53
TCGA-GM-A2DL-01	AKAP6,ARID2,CDC16,PTPRM,TP53,WWOX
TCGA-GM-A2DO-01	CDH1,COL14A1,PTPRD
TCGA-HN-A2NL-01	MACF1,SLC25A17,WWOX
TCGA-AC-A2FE-01	MAP3K1
TCGA-AC-A2FM-01	GNAS,INADL,LRBA,PPP2R3A,USP9X,WWOX
TCGA-AC-A2QI-01	CATSPERG,CDH13,PIK3CA,WWOX
TCGA-AC-A2QJ-01	AGAP1,FMN1
TCGA-AC-A3BB-01	CDH1,MUC5B
TCGA-AR-A2LJ-01	CCND1,CDH1,INTS4,PIK3CA,SHANK2,WWOX
TCGA-BH-A0B6-01	ACACA,ANK2,ARID2,DNAH6,INTS4,MACF1,MGAM,PIK3CA,RBMX,SMARCA2
TCGA-E2-A1LE-01	ARID2,ATAD5,KCNQ5,SYNJ2,TP53
TCGA-E2-A2P5-01	CDH1,GUCY1B3,NSD1,PIK3CA,TP53
TCGA-E2-A2P6-01	CDH1,SIRPB1
TCGA-A2-A3KC-01	CDH1,PIK3CA,RSRC1,SIRPB1,WWOX
TCGA-A2-A3KD-01	CES1,MED1
TCGA-A7-A3IZ-01	CDH1,WWOX
TCGA-A7-A3J0-01	PPP2R3A
TCGA-A7-A3J1-01	CDH1,PIK3CA,RSRC1
TCGA-AC-A23G-01	CDH1,HECTD1
TCGA-AC-A3HN-01	SHANK2
TCGA-C8-A3M8-01	MAP3K1,PIK3CA,SHANK2
TCGA-E2-A3DX-01	CNTN1
TCGA-E9-A3HO-01	CDH1,PHF12
TCGA-A7-A2KD-01	ACACA,SPAG17,TP53
TCGA-A7-A3IY-01	PTPRM
TCGA-AC-A2BK-01	CDH13,DSPP,TBC1D5,WWOX
TCGA-AC-A2BM-01	INTS4,MDGA2,NOX4
TCGA-AC-A3OD-01	CDH1,CDH13,MUC12,PIK3CA,PTPRD,RPGR,SIRPB1,TP53
TCGA-B6-A0I1-01	ARID2,DMXL2,GABBR2
TCGA-C8-A3M7-01	CDH1,MED1,PIK3CA
TCGA-E9-A3Q9-01	MUC5B,RYR2
TCGA-EW-A1PC-01	AGAP1,AHNAK,GALNTL6,GPR98,PIK3CA,RBMX,TP53
TCGA-EW-A2FR-01	KDM4C,TP53
TCGA-GI-A2C9-01	ARID2,MACF1,MED1,TP53
TCGA-GM-A3NY-01	FMN2,PIK3CA,SLC25A17
TCGA-A2-A0CK-01	CCND1,CDH1,GALNTL6,SHANK2,SIRPB1
TCGA-A2-A0CO-01	CDH1,DMD
TCGA-A2-A0CR-01	APOB,CDH1,FMN2,MUC16,PIK3CA
TCGA-A7-A13H-01	CDH1
TCGA-A7-A3RF-01	APOB,TP53
TCGA-AC-A3EH-01	FMN2,PPP2R3A
TCGA-AC-A3QQ-01	ACACA,SIRPB1
TCGA-AC-A3TM-01	CDH1,CHL1,PIK3CA
TCGA-AC-A3TN-01	ARID2,CDH1,PIK3CA
TCGA-AC-A3W5-01	DNAH8,NSD1
TCGA-AC-A3W6-01	ARHGAP26,CDH1,LRRK1,MACF1,PIK3CA,SHANK2
TCGA-AC-A3W7-01	CDH1,PIK3CA
TCGA-AR-A1AM-01	GUCY1B3,PTEN
TCGA-BH-A28O-01	ARID2
TCGA-E2-A14U-01	ARID2,GUCY1B3,PIK3CA
TCGA-E9-A3QA-01	DMXL2,PTPRM
TCGA-EW-A3U0-01	ARID2,TP53
TCGA-GM-A3NW-01	CHL1,FGFR1,MUC12,MUC16,PIK3CA,SHANK2
TCGA-A2-A0EP-01	WWOX
TCGA-A2-A3XS-01	GUCY1B3,TP53
TCGA-A2-A3XT-01	MACF1,SPAG17,TP53
TCGA-A2-A3XU-01	DMD
TCGA-AC-A3QP-01	GUCY1B3
TCGA-AC-A3YJ-01	LCT,PIK3CA,PTEN,USP32
TCGA-E9-A3X8-01	AKAP6,ARID2,CDH1,WWOX
TCGA-GM-A3XL-01	MUC12,RYR2,TP53
TCGA-GM-A3XN-01	CDC16,CDH1,NRXN2,NSD1,PIK3CA,SIRPB1
TCGA-JL-A3YX-01	DPP6,GUCY1B3,MAP3K1,PIK3CA,PTPRM,SLC25A17
TCGA-A2-A3XV-01	TP53
TCGA-A2-A3XW-01	MED1
TCGA-A2-A3XX-01	MUC16,TP53
TCGA-A2-A3XY-01	FMN2,TP53
TCGA-A2-A3XZ-01	ANK2,DPP6,GALNTL6,GUCY1B3,MED1,NSD1
TCGA-A2-A3Y0-01	CHL1,COL14A1,LRBA,MAP3K1,RYR2,SHANK2,SIRPB1,TP53
TCGA-AC-A3YI-01	CDH1,DPP6,MUC16
TCGA-B6-A3ZX-01	ARID2,PPP2R3A,TP53
TCGA-B6-A400-01	CDH13,LCT,MED1,RIMS1,TP53
TCGA-B6-A401-01	GUCY1B3,PIK3CA,TP53
TCGA-B6-A402-01	ARID2,CDK12,TP53
TCGA-B6-A40B-01	ANK2,CDH1,COL14A1,GALNTL6,PIK3CA
TCGA-B6-A40C-01	CDH1,GATA3
TCGA-D8-A3Z6-01	CDH1,FMN2,MAP3K1,PIK3CA
TCGA-JL-A3YW-01	MED1,MUC16,PHF11,PTPRM,TP53
TCGA-A7-A425-01	LRBA,PIK3CA,SLC25A17
TCGA-A7-A426-01	CDH1
TCGA-B6-A408-01	ANK2,PIK3CA
TCGA-B6-A409-01	TP53
TCGA-BH-A42T-01	PIK3CA
TCGA-BH-A42U-01	GUCY1B3,TRIO
TCGA-BH-A42V-01	MAP3K1,MUC12,MUC5B,PIK3CA
TCGA-D8-A3Z5-01	CDH1
TCGA-EW-A3E8-01	CDH1,LCT,PIK3CA
TCGA-EW-A423-01	AKAP6
TCGA-EW-A424-01	FMN1
TCGA-GM-A3XG-01	CECR2
TCGA-LL-A440-01	SIRPB1
TCGA-LL-A441-01	GALNTL6,PIK3C2B
TCGA-LL-A442-01	CHL1
TCGA-A2-A4RW-01	AHNAK,KDM4C,LRRK1
TCGA-A2-A4RX-01	NSD1,PIK3R1,RSRC1,SIRPB1
TCGA-A2-A4RY-01	KCNQ5,PIK3CA,SIRPB1
TCGA-A2-A4S0-01	DPP6
TCGA-A2-A4S1-01	SIRPB1,TP53
TCGA-A2-A4S2-01	AHNAK,CDH1,DPP6,GALNTL6,PIK3CA
TCGA-A2-A4S3-01	ARID2,MED1,SMARCA2,TP53
TCGA-A7-A4SA-01	CDH13,MED1,SIRPB1,TP53
TCGA-A7-A4SB-01	CDH1,INTS4,MAP3K1,PIK3CA,SHANK2,WWOX
TCGA-A7-A4SC-01	ANK2,CDH1
TCGA-A7-A4SD-01	TP53
TCGA-A7-A4SE-01	MGAM,NSD1,TP53,TRIO,UBE3A
TCGA-A7-A4SF-01	ARID2,CHL1,FGFR1,GALNTL6,PIK3CA
TCGA-AQ-A54N-01	CHL1,FMN2,MACF1,TP53
TCGA-AQ-A54O-01	APBA1,ARID2,CHL1,DMD,DMXL2,LRBA,PIK3CA
TCGA-D8-A4Z1-01	PPP2R3A
TCGA-E9-A54X-01	COL14A1,SCN2A
TCGA-E9-A54Y-01	ARID2,COL14A1,NSD1
TCGA-GM-A4E0-01	CDH1,PTEN
TCGA-LL-A50Y-01	CDH1,MST1,PIK3CA
TCGA-LQ-A4E4-01	CDH1,COL14A1,FMN2,MED1,NSD1,PIK3CA
TCGA-MS-A51U-01	CDH1,PIK3CA
TCGA-A7-A56D-01	DMD,MUC5B,PIK3R1,TP53
TCGA-AR-A5QM-01	CDH1,PIK3CA
TCGA-BH-A5IZ-01	DMD,TP53
TCGA-BH-A5J0-01	AHNAK,MED1,MUC12,PIK3CA,TP53
TCGA-E9-A5FK-01	APBA1
TCGA-E9-A5FL-01	LRRK1,TP53
TCGA-HN-A2OB-01	CNGB1,FMN1,GUCY1B3,PIK3CA
TCGA-OK-A5Q2-01	MAP3K1,PIK3CA
TCGA-OL-A5D6-01	DPP10,PIK3CA,TP53
TCGA-OL-A5D7-01	TP53
TCGA-OL-A5D8-01	CDH13,DMD,GATA3
TCGA-OL-A5DA-01	CDH1,MUC16,NOX4,PIK3CA,TRIO
TCGA-PE-A5DC-01	ARHGAP26,PAPOLA
TCGA-PE-A5DD-01	CDH1,CES1,PIK3CA
TCGA-PE-A5DE-01	CDH1,CHL1,GNAS,MDGA2,PIK3CA,RPGR,SIRPB1,TP53,WWOX
TCGA-A7-A5ZV-01	CHL1,DMD,DMXL2,MUC5B,TP53
TCGA-AC-A5EH-01	PIK3CA,SIRPB1,TP53
TCGA-AC-A5XU-01	CATSPERG,DPP6,TP53
TCGA-AR-A5QN-01	FGFR1,WWOX
TCGA-AR-A5QP-01	PIK3CA
TCGA-AR-A5QQ-01	TP53
TCGA-E9-A5UO-01	GATA3,MUC5B,PTPRD,SMARCA2
TCGA-E9-A5UP-01	ARID2,CDH13,MGAM,RYR2,TRIO,WWOX
TCGA-GM-A5PV-01	ARID2,CDH1,PTEN
TCGA-GM-A5PX-01	CDH1,WWOX
TCGA-LL-A5YM-01	FMN2,MUC12
TCGA-LL-A5YN-01	PIK3CA,PTPRD
TCGA-LL-A5YO-01	GALNTL6,PTPRM,TP53
TCGA-LL-A5YP-01	PTEN,PTPRM,THBS3,TP53
TCGA-OL-A5RU-01	RYR2
TCGA-OL-A5RV-01	CDH1,FMN1
TCGA-OL-A5RW-01	CDH13,RYR2,TP53
TCGA-OL-A5RX-01	GATA3,NRXN2,PIK3CA
TCGA-OL-A5RY-01	TP53
TCGA-OL-A5RZ-01	GNAS,KSR1,USP32
TCGA-OL-A5S0-01	AGAP1,ARID2,GALNTL6,MUC16,PIK3CA
TCGA-A7-A5ZW-01	MAP3K1,MUC12,PIK3CA
TCGA-A7-A5ZX-01	ARID2,CDH1,DMD
TCGA-AC-A5XS-01	CDH1,DMXL2,DPP6,FDFT1,GPR98,MUC12,MUC16,MUC5B,PIK3CA,RIMS1
TCGA-AC-A62X-01	DMD,GALNTL6,TBC1D5,TP53
TCGA-AC-A62Y-01	COL14A1,INADL,PTEN,SIRPB1
TCGA-E2-A56Z-01	FGFR1
TCGA-E2-A570-01	GATA3,GNAS
TCGA-E2-A573-01	LCT,TP53
TCGA-E2-A574-01	DPP10
TCGA-LL-A5YL-01	PHF12
TCGA-OL-A66H-01	MGAM
TCGA-OL-A66I-01	NSD1,SLC25A17,TP53
TCGA-OL-A66J-01	ARID2,FGFR1,MUC12,OTUD4
TCGA-OL-A66K-01	CDH1,GATA3
TCGA-AC-A62V-01	USP32
TCGA-E2-A572-01	AGAP1,CDH13,DMD,DNAH8,DPP6,E2F3,FGFR1,FMN1,INADL,KDM4C,MDGA2,MGAM,PAPOLA,PARD3B,PTPRM,SHANK2,SYNJ2,TBC1D5,TRIO
TCGA-E2-A576-01	CES1,CHL1,TBC1D5
TCGA-E9-A6HE-01	CNGB1
TCGA-LD-A66U-01	WWOX
TCGA-LL-A6FP-01	FMN2,GUCY1B3
TCGA-LL-A6FQ-01	TBC1D5
TCGA-LL-A6FR-01	MED1
TCGA-OL-A66L-01	SYNJ2
TCGA-OL-A66N-01	SMARCA2
TCGA-OL-A66O-01	THBS3
TCGA-OL-A66P-01	FMN2
TCGA-AC-A6IX-01	ARID2,KCNQ5
TCGA-BH-A6R9-01	CES1
TCGA-D8-A73X-01	ARID2,DPP6
TCGA-EW-A6SA-01	FMN2,MED1
TCGA-EW-A6SB-01	ARID2,GALNTL6
TCGA-EW-A6SC-01	CHL1
TCGA-LL-A73Z-01	PTPRM
TCGA-LL-A740-01	E2F3
TCGA-S3-A6ZF-01	NSD1
TCGA-S3-A6ZG-01	CES1,GALNTL6,NSD1
TCGA-S3-A6ZH-01	CHL1,DMD,GALNTL6,GUCY1B3,NOX4
TCGA-AC-A6IX-06	DPP6,KCNQ5
TCGA-A7-A6VV-01	SIRPB1
TCGA-A7-A6VW-01	AKAP6,SLC25A17
TCGA-A7-A6VX-01	COL14A1
TCGA-A7-A6VY-01	THBS3
TCGA-AC-A6IW-01	CDH13
TCGA-AC-A6NO-01	RSRC1
TCGA-BH-A6R8-01	RSRC1
TCGA-EW-A6S9-01	ACACA,CDH13
TCGA-EW-A6SD-01	ACACA,COL1A1,LRBA,RIMS1
TCGA-LD-A74U-01	LRRK1
TCGA-LL-A73Y-01	NSD1
TCGA-OL-A6VO-01	CHL1
TCGA-OL-A6VR-01	FDFT1
TCGA-V7-A7HQ-01	CDC16
TCGA-AC-A7VB-01	FGFR1,FMN2,MED1,NSD1
TCGA-AC-A7VC-01	RSRC1
TCGA-AQ-A7U7-01	WWOX
TCGA-BH-A8FZ-01	ARID2,PTPRD
TCGA-BH-A8G0-01	ARID2
TCGA-D8-A73W-01	ARID2
TCGA-LD-A7W5-01	NOX4,TRIO
TCGA-LD-A7W6-01	PTPRM
TCGA-LL-A7SZ-01	CDK12
TCGA-LL-A7T0-01	COL14A1,NSD1
TCGA-AC-A8OP-01	FMN2
TCGA-BH-A8FY-01	DPP6,NOX4,SIRPB1
TCGA-C8-A8HP-01	SIRPB1
TCGA-C8-A8HQ-01	CES1,CHL1,FMN2,GUCY1B3
TCGA-C8-A8HR-01	PTPRM
TCGA-LL-A8F5-01	ARID2
TCGA-PL-A8LZ-01	SIRPB1,WWOX
TCGA-W8-A86G-01	ARID2,WWOX
TCGA-XX-A899-01	CCND1
TCGA-XX-A89A-01	ARID2,INTS4,SHANK2
TCGA-3C-AAAU-01	SYNJ2
TCGA-3C-AALI-01	ACACA,COL1A1
TCGA-3C-AALJ-01	COL14A1,DMD,FGFR1
TCGA-3C-AALK-01	FMN2
TCGA-4H-AAAK-01	DPP6
TCGA-5L-AAT0-01	GALNTL6
TCGA-5L-AAT1-01	ARID2,SIRPB1
TCGA-5T-A9QA-01	WWOX
TCGA-AC-A4ZE-01	SHANK2
TCGA-AC-A8OQ-01	SLC25A17
TCGA-AC-A8OR-01	PPP2R3A,WWOX
TCGA-BH-AB28-01	ARID2,WWOX
TCGA-E2-A9RU-01	KCNQ5,RIMS1
TCGA-LD-A9QF-01	SLC25A17
TCGA-LL-A9Q3-01	CECR2
TCGA-OL-A6VQ-01	WWOX
TCGA-OL-A97C-01	GUCY1B3
TCGA-PL-A8LV-01	WWOX
TCGA-PL-A8LX-01	DPP10
TCGA-PL-A8LY-01	NOX4
TCGA-S3-AA0Z-01	THBS3
TCGA-S3-AA10-01	ARHGAP26
TCGA-S3-AA11-01	KDM4C
TCGA-S3-AA12-01	FGFR1
TCGA-S3-AA14-01	GABBR2
TCGA-S3-AA15-01	AGAP1
TCGA-S3-AA17-01	UBE3A
TCGA-UL-AAZ6-01	COL14A1
TCGA-UU-A93S-01	TBC1D5
TCGA-WT-AB41-01	FGFR1
TCGA-WT-AB44-01	ARID2,FMN1,GUCY1B3,INADL
TCGA-Z7-A8R5-01	CATSPERG
TCGA-Z7-A8R6-01	CCND1
