# Supplementary material for: HIT'nDRIVE: patient-specific multidriver gene prioritization for precision oncology
Source: HighWire-hosted journal article supplement (doi:10.1101/gr.221218.117), 2017-07-18
Supplement: Supplemental_Table_S9.xlsx [file Supplemental_Table_S9.xlsx]

## Sheet: Supplemental_Table_S9
Supplemental Table S9. Description of additional gene-expression validation datasets used in the study
Cancer Type	Dataset Name	Data Accession	Platform	Remarks	Reference
Glioblastoma	Murat-2008	GSE7696	HG-U133_Plus_2	gene-expression profiles of 173 normal brain tissues from GSE11882 were added	(Murat et al., 2008)
Glioblastoma	Sun-2006	GSE4290	HG-U133_Plus_2		(Sun et al., 2006)
Ovary	Yoshihara-2009	GSE12470	Agilent-012097		(Yoshihara et al., 2009)
Ovary	Bowen2009	GSE14407	HG-U133_Plus_2		(Bowen et al., 2009)
Prostate	Taylor-2010	GSE21034	HuEx-1_0-st		(Taylor et al., 2010)
Prostate	Grasso2012-PC	GSE35988	Agilent-014850	Localized prostate cancer cohort	(Grasso et al., 2012)
Prostate	Grasso2012-CRPC	GSE35988	Agilent-014850	Castrate resistant prostate cancer cohort
Prostate	SMMU-PC	-	RNA-seq	data received courtesy of Dr. Shancheng Ren, Second Military Medical University (SMMU), China	unpublished
Breast	Richardson-2006	GSE3744	HG-U133_Plus_2		(Richardson et al., 2006)
Breast	METABRIC-Cambridge	EGAS00000000083	RNA-seq	Cambridge cohort	(Curtis et al., 2012)
Breast	METABRIC-Vancouver		RNA-seq	Vancouver cohort
