# Supplementary material for: HIT'nDRIVE: patient-specific multidriver gene prioritization for precision oncology
Source: HighWire-hosted journal article supplement (doi:10.1101/gr.221218.117), 2017-07-18
Supplement: Supplemental_Table_S10.xlsx [file Supplemental_Table_S10.xlsx]

## Sheet: Supplemental_Table_S10
Supplemental Table S10. Driver Seeded Modules of TCGA-GBM.
Module	Seed	Genes
GBM-01	GRM3	GRM3,HTR1E,RGS4,SST,PDYN,RGS7,SSTR2
GBM-02	PEX5L	PEX5L,DNM1,DYRK1A,PEX7,PHYH,PHYHIP
GBM-03	IDH1	IDH1,MDH1,OGDHL
GBM-04	RB1,TP53,ABCB1	PCNA,RB1,RBBP8,SMC4,SP3,TP53,WEE1,YBX1,ABCB1,NSF,SLC22A2,STX1A,SYT1,RPA1
GBM-05	ANK1	ANK1,KCNAB2,KCNQ3,KCNV1,CCKBR,KALRN,SPTBN2,TIAM1
GBM-06	CNTNAP2	CNTNAP2,KCNA2,KCNAB1,KCNAB2,KCNV1
GBM-07	PIK3R1,CDKN2A	CCKBR,PIK3R1,TAC3,CDKN2A,PCNA,RRM2,WRN,YBX1,SNCA,UCHL1,NOS1AP,SYN1,ZYX
GBM-08	MDM2	CACNG2,GRIN1,GRIN2A,MDM2,CACNB1,CACNG3
GBM-09	SEC61G	RPN2,SEC61A1,SEC61G,SSR1,TRAM1
GBM-10	FGFR3	FGF13,FGFR3,MAPK8IP2,SCN2A,CAMK2A,GRIN1,STAT1
GBM-11	SLC25A13	SLC25A13
GBM-12	PIP4K2C	CCKBR,DNM1,PIP4K2C,PLCB1,SYNJ1,SYNJ2
GBM-13	ANK2	ANK2,KCNB2,KCNQ3,KCNV1,SPTBN2
GBM-14	CHEK2	CHEK2,PCNA,PPP4C
GBM-15	EGFR	EGFR,GNAI3,TNC
GBM-16	OS9	HSPA5,OS9,P4HB,PPIB,PTBP1
GBM-17	PDGFRA	CACNA1I,CACNB1,CACNG3,CAV3,PDGFRA
GBM-18	CUBN	CUBN,DNM1,GIF,PRSS3,SYNJ1,TF
GBM-19	CHL1	CHL1,CNTN6,DLG2,FYN,GRIN1
GBM-20	GSTT1	GAD2,GGT1,GLS,GSTT1,MGST3,GPX7,P4HB,PDIA6
GBM-21	IFNA10	CACNG3,CAMK2G,IFNA10,IFNG,RYR2,GRIN1,GRIN2B,GRM5,PTPN11
GBM-22	FN1	CD44,FN1
GBM-23	NF1	HDAC1,NF1,SMARCC1,SMARCE1,TGIF1
GBM-24	UBC	PCNA,TYMS,UBC
GBM-25	DNAH7	AKAP5,CACNG3,DNAH7,DYNC1H1,PRKAR2B,PTBP1,SNRPG,TPR
GBM-26	FLG	CACNG3,CAMK2A,FLG,PLCG1,CACNB1,FGFR1,NCAM1
GBM-27	NLRP3	CASP1,NLRP3,PCNA,PTBP1,RRM2,TXN,APP,CCKBR,SST
GBM-28	ITGB2	CAMK2A,GRIN2A,ITGB2,PTK2B,TLN2
GBM-29	F5	ACTN2,F5,GRIN1
GBM-30	TPBG	DNM1,GABRA5,GIPC1,PPP3CA,TPBG
GBM-31	HUWE1	HUWE1,PCNA,TYMS,UBE2C,UBE2D1
GBM-32	SYNE1	NUP37,PCNA,STAG2,SYNE1,UBE2I
GBM-33	PTEN	INPP4A,PTEN,SYNJ1
