# Supplementary material for: HIT'nDRIVE: patient-specific multidriver gene prioritization for precision oncology
Source: HighWire-hosted journal article supplement (doi:10.1101/gr.221218.117), 2017-07-18
Supplement: Supplemental_Table_S11.xlsx [file Supplemental_Table_S11.xlsx]

## Sheet: Supplemental_Table_S11
Supplemental Table S11. Driver Seeded Modules of TCGA-OV
Module	Seed	Genes
OV-01	GSTT1,UGT2B17	ADH6,GSTA3,GSTM5,GSTT1,CYP3A5,CYP2B6,ADH1B,MAOB,UGT2B17
OV-02	LRP2BP	LRP2BP,CFD,CLU,LRP2,MMRN1
OV-03	SYNE1	STAG3,SYNE1
OV-04	UGT2B17	ADH1B,GSTA3,MAOB,UGT2B17,ADH6,CYP3A5,KL
OV-05	ASPA	ADH6,ASPA,DDC,GOT2,GSTA3,MAOB
OV-06	RB1	GINS1,MCM6,RB1,SMC4,CCNB1,TFDP2,UBE2C
OV-07	BRCA2	BRCA2,BUB1B,UBE2C,AURKB,SMC4,ZWINT
OV-08	CCNE1	CCNE1,E2F3,RRM2,TYMS,UBC,UBE2C,ZWINT
OV-09	KRAS	CDC20,KRAS,RASSF1,UBE2C,VEGFA
OV-10	POLB	BIRC5,POLB,RACGAP1,ZWINT,AURKA,TUBG1,UBE2C
OV-11	TRIP10	BUB1B,ECT2,RACGAP1,RHOT2,TRIP10
OV-12	NDRG1	AURKA,MYCN,NDRG1,TPX2,UBE2C
OV-13	SORBS2	CCL15,CCL21,CCR5,PTK2B,SORBS2,CBL,DNAH9,DYNLL1,MYH11,SORBS1,YWHAE
OV-14	WRN	ESPL1,TOP2A,WRN,ZWINT,RFC2,RFC4,TOPBP1,PLK1,SMC4,TOP3A
OV-15	CPT1B	ACSBG1,CPT1B,FOXA2,IRS1,MYH11,SORBS1
OV-16	PPP2R2A	CCNB2,CDC20,FOXM1,PPP2R2A,TOP2A
OV-17	PDE4D	CCL21,GNAT3,PDE4D,PDE8B,ADCY9,PLN,PRKACA
OV-18	CREBBP	CREBBP,PLK1,SMC4,UBE2C,YY1,TFDP2,TOP2A,VEGFA,YAP1
OV-19	PSENEN	ACTG2,MYH11,NOTCH1,PSENEN
OV-20	FDFT1	CYP2B6,FDFT1,GSTA3,MYH11,UBC
OV-21	PRKCI	AURKA,PRKCI,RALA,SLC2A4,NDC80,TTK,VAMP2,YKT6,ZWINT
OV-22	PPARA	AGT,CCL21,PPARA,THRA
OV-23	TP53	ACTL6A,PTTG1,TP53,UBE2C,YY1,ZNF668,PLK1,RACGAP1,ZWINT
OV-24	PHC3	BUB1B,CDC27,PHC3,TTK,UBE2C,UBE2S,CENPA,EZH2,RBBP4,ZWINT
OV-25	FAM49B	CCNB1,FAM49B,SMC4,UBC,ZNF131,ZWINT
OV-26	TNKS	C6,PSMA1,TNKS
OV-27	VPS8	BUB1B,PSMA7,RAB7A,UBE2C,VPS33B,VPS8
OV-28	PTPRF	INSR,MYH11,PTPRF,SOCS2,SORBS1
OV-29	DTNA	DES,DMD,DTNA,MYH11,TPM1,TTN,VIM
OV-30	MUC16	AURKA,MSLN,MUC16,RALA,UBE2C
OV-31	SNAP23	AURKA,RALA,SNAP23,STX3,TPX2
OV-32	GEMIN4	GEMIN4,KPNA2,NUP210,TPX2
OV-33	FOXK2	BAP1,EZH2,FOXK2,RNF2,SCML2,UBE2C
OV-34	RFX1	CCNB1,CHEK2,RFX1,STMN1,UBE2C
OV-35	MAP3K1	AURKA,MAP3K1,PAK1,RACGAP1,UBE2C,VAV3
OV-36	HIC1	HIC1,TFDP2,TK1,TOP2A,TOPBP1
