# Supplementary material for: HIT'nDRIVE: patient-specific multidriver gene prioritization for precision oncology
Source: HighWire-hosted journal article supplement (doi:10.1101/gr.221218.117), 2017-07-18
Supplement: Supplemental_Table_S12.xlsx [file Supplemental_Table_S12.xlsx]

## Sheet: Supplemental_Table_S12
Supplemental Table S12. Driver Seeded Modules of TCGA-PRAD.
Module	Seed	Genes
PRAD-01	PTEN	CAV1,PTEN,PIK3C2G,EFNB1,EPHA10,EPHB4,PIP5KL1
PRAD-02	MED12	PPARGC1A,MED12,MED21
PRAD-03	OBSCN	OBSCN,INPP5B,CALM1,PIK3C2G,ITSN1,TAGAP,TRIP10,EFNB1
PRAD-04	NRG1,NRG3	STAT5B,PRKCB,NRG2,NRG1,PRKCA,NRG3,PLCG2,PIK3C2G,LPIN1,ERBB3,NRAS,EFNB1,AR
PRAD-05	MYOF	MYOF,CAV1,KDR,ANGPT1
PRAD-06	RYR1	CALM1,TRPC3,ASPH,RYR1
PRAD-07	MUC4	MUC4,GCNT4,ST6GALNAC2,ST6GALNAC4
PRAD-08	TP53	TP53,EZH2,EPCAM,MAPKAPK5,SOX4
PRAD-09	PCYT1B	LPIN1,CHPT1,LPCAT2,PCYT1B,PHOSPHO1,ETNK2
PRAD-10	BRAF	CAMK2G,CALM1,BRAF,KSR1,SPRY2
PRAD-11	PKHD1,HTR7,ERG	CAV1,PKHD1,CAV2,TRPC1,PKD2,GNAS,GNAZ,HTR7,PIK3C2G,ERG,CA14,IQCA1,TP53INP2,CLCNKB,PIK3R1,CD2AP,EFNB1,GNB1
PRAD-12	SIRPB1	PIK3R1,CAMK2G,CALM1,IFNGR1,SIRPB1,PTPN11,ANGPT1,COL4A6,CD47
PRAD-13	WWOX	SRC,WWOX,EFNB1,CAV2,UBC,TNK2,HIST3H2A,SLC19A1,YAP1,ERBB2,NRG2
PRAD-14	IDH1	IDH1,EZH2,ALDH18A1,GLUD1,PYCR1,TIMM13,GOT1,DDO,HPD,SLC25A12,UBC,MDH2,SLC19A1,TTLL12
PRAD-15	ATM	ATM,RUVBL1,TELO2,HJURP
PRAD-16	GUCY1B3	PDE1C,PRKG1,PPP1R12A,PPP1R12B,GUCY1B3,TRPC6
PRAD-17	FOXA1	FOXA1,SHH,DLX1,PRDM15,PGR,GATA3,SCGB1A1,PGRMC1
PRAD-18	ZMYM3	UBC,EZH2,KDM1A,ZMYM3,SLC19A1
PRAD-19	POLR2D	PPARGC1A,PDE1C,POLR2D,NPR1,NPR2
PRAD-20	NSD1	PYCR1,P4HB,PLOD3,P4HA3,NSD1
PRAD-21	BCLAF1	MAGOH,NUP210,BCLAF1,HIST1H2BI,HIST3H2A,GNL3,NLE1,RPL38
PRAD-22	SYNE1	NUP210,SYNE1,UBE2I,SOX4,SYCE2,EZH2,MYO19
PRAD-23	COL12A1	COL17A1,COL4A6,COL12A1,MMP9,SMAD4,DLX1
PRAD-24	NBPF1	AR,NBPF1,SMPDL3B,TSPAN13,ZFP62
PRAD-25	ACAN	ACAN,ADAMTS5,CHST2
PRAD-26	STAB2	ROCK1,SLC9A1,EFNB1,HMMR,STAB2,CHP2,PIP5K1B
PRAD-27	NKX3-1	AR,NKX3-1,SMPDL3B,TMEM184A,ZFP36L2
PRAD-28	SPOP	CALM1,SPOP,KLHL21,CAMKK2,KLHDC5
PRAD-29	MCPH1	EZH2,AURKB,KIF4A,SMC2,MCPH1,PLK1,MYBL2,NCAPG2
