# Supplementary material for: HIT'nDRIVE: patient-specific multidriver gene prioritization for precision oncology
Source: HighWire-hosted journal article supplement (doi:10.1101/gr.221218.117), 2017-07-18
Supplement: Supplemental_Table_S13.xlsx [file Supplemental_Table_S13.xlsx]

## Sheet: Supplemental_Table_S13
Table S13. Driver Seeded Modules of TCGA-BRCA
Module	Seed	Genes
Supplemental BRCA-01	DMD,SCN2A	DMD,SCN2A,SCN4B,SCN5A
BRCA-02	PIK3R1,PIK3CA,PTPRM,PIK3C2B	FIGF,PIK3R1,TNS1,PIK3CA,PTPRM,PVRL3,EGFR,PIK3C2B,PLCZ1,SPRY2
BRCA-03	CBX8	CBX8,EZH2,UBE2C,HJURP,OIP5,RBBP7,UBE2S
BRCA-04	COL1A1	COL10A1,COL1A1
BRCA-05	PTEN	CAV1,PTEN,SPRY2
BRCA-06	AHNAK	AHNAK,OXTR,S100B,SAA1
BRCA-07	BRCA2	AURKB,BRCA2,UBE2C,ZWINT,BUB1B,PLK1,FANCI,RAD51,XRCC2
BRCA-08	E2F3	CDK1,E2F3,TK1,UBE2C
BRCA-09	DPP6	DPP6
BRCA-10	APOB	APOB,LPL,PTPN11,SPRY2
BRCA-11	CHL1	CHL1,CAV1,FYN,FIGF,KDR,NRP1,FGF2,TLN1,TNS1
BRCA-12	ANK2	ANK2,SPTBN1,TGFBR2,SOS1,SPRY2,SPTB
BRCA-13	CDC16	CDC16,NEK2,PTTG1,TTK,UBE2C,UBE2S
BRCA-14	ARHGAP26	ARHGAP26,RHOJ,SOS1,SPRY2
BRCA-15	CDH13	ADIPOQ,CDH13,LPL,NR3C1,CDH5,CTNND1,PPAP2B,PTPRB,SPRY2
BRCA-16	FGFR1	FGF2,FGFR1,KL,SOS1,SPRY2
BRCA-17	ITGA2	CAV1,CAV2,FIGF,ITGA2,SDC2
BRCA-18	AKAP6	ADCY5,AKAP6,PDE2A,RAPGEF3,MRAS,RAF1,SPRY2
BRCA-19	UBE3A	CDC20,TPX2,UBE2S,UBE3A,ZNF598,ZWINT,TK1,TYMS,UBE2C
BRCA-20	ATAD5	ATAD5,CDCA5,CHTF18,ESCO2,RFC4,TIMELESS,UBE2T,KIAA0101,PCNA,FEN1,RAD51,RFC5
BRCA-21	CNTN1	CNTN1,PTPRB,SPRY1,SPRY2,FIGF,PTPRZ1,TEK
BRCA-22	PAPOLA	BUB1,PAPOLA,RAE1,SNRPG,SPC25,ZWINT
BRCA-23	PHF12	MLF1IP,OIP5,PHF12,RBBP7,SPC24,ZWINT,HJURP,MORF4L2,RUVBL1
BRCA-24	APBA1	APBA1,APP,FIGF,VWF
BRCA-25	CCND1	CCNB1,CCND1,PKMYT1
BRCA-26	TP53	PLK1,TP53,UBE2C,ZNF668
BRCA-27	ROCK1	MYH11,PPP1R12B,ROCK1
BRCA-28	TRIO	FAM13A,OXTR,TRIO
BRCA-29	PIK3C2B	EGFR,PIK3C2B,PLCZ1,SPRY2
BRCA-30	TBC1D5	LPL,MOGAT3,PPAP2A,PPAP2B,TBC1D5
BRCA-31	GATA3	FANCI,GATA3,UBE2T,ZBTB32
BRCA-32	PIK3CA,PTPRM	FIGF,PIK3CA,PTPRM,PVRL3,TNS1
BRCA-33	MST1	CDC25C,MST1,PLK1,YWHAH
