# Supplementary material for: HIT'nDRIVE: patient-specific multidriver gene prioritization for precision oncology
Source: HighWire-hosted journal article supplement (doi:10.1101/gr.221218.117), 2017-07-18
Supplement: Supplemental_Table_S14.xlsx [file Supplemental_Table_S14.xlsx]

## Sheet: Supplemental_Table_S14
Supplemental Table S14. Tumor phenotype classification accuracy in validation datasets using knn-1 classifier
Method	CancerType	Dataset	No. of Samples		Accuracy (Min)	Accuracy (Mean)	Accuracy (Max)
			Normal	Tumor
HIT'nDRIVE-Unsupervised	GBM	TCGA-GBM	10	309	0.94	0.981	1
HIT'nDRIVE-Unsupervised	GBM	Murat-2008	177	80	0.68	0.714	0.76
HIT'nDRIVE-Unsupervised	GBM	Sun-2006	27	77	0.68	0.822	0.87
HIT'nDRIVE-Unsupervised	OV	TCGA-OV	32	457	0.89	0.990196	1
HIT'nDRIVE-Unsupervised	OV	Yoshihara-2009	10	43	0.74	0.922157	0.96
HIT'nDRIVE-Unsupervised	OV	Bowen-2009	12	12	0.79	0.955294	1
HIT'nDRIVE-Unsupervised	PRAD	TCGA-PRAD	50	333	0.78	0.863077	0.9
HIT'nDRIVE-Unsupervised	PRAD	Grasso2012-PC	28	59	0.57	0.817692	0.91
HIT'nDRIVE-Unsupervised	PRAD	Grasso2012-CRPC	28	35	0.65	0.841538	0.95
HIT'nDRIVE-Unsupervised	PRAD	Taylor-2010	29	131	0.7	0.789231	0.85
HIT'nDRIVE-Unsupervised	PRAD	SMMU-PC	65	66	0.54	0.739231	0.82
HIT'nDRIVE-Unsupervised	BRCA	TCGA-BRCA	113	1102	0.81	0.98	0.99
HIT'nDRIVE-Unsupervised	BRCA	METABRIC-CAMBRIDGE	144	997	0.79	0.893659	0.92
HIT'nDRIVE-Unsupervised	BRCA	METABRIC-VANCOUVER	144	995	0.79	0.891951	0.91
HIT'nDRIVE-Unsupervised	BRCA	Richardson-2006	7	40	0.59	0.784146	0.91
HIT'nDRIVE-OptDis	GBM	TCGA-GBM	10	309	0.98	0.999123	1
HIT'nDRIVE-OptDis	GBM	Murat-2008	177	80	0.58	0.84193	0.94
HIT'nDRIVE-OptDis	GBM	Sun-2006	27	77	0.79	0.833684	0.88
HIT'nDRIVE-OptDis	OV	TCGA-OV	32	457	1	1	1
HIT'nDRIVE-OptDis	OV	Yoshihara-2009	10	43	0.7	0.943	1
HIT'nDRIVE-OptDis	OV	Bowen-2009	12	12	0.58	0.8845	1
HIT'nDRIVE-OptDis	PRAD	TCGA-PRAD	50	333	0.91	0.939524	0.95
HIT'nDRIVE-OptDis	PRAD	Grasso2012-PC	28	59	0.67	0.862326	0.93
HIT'nDRIVE-OptDis	PRAD	Grasso2012-CRPC	28	35	0.95	0.984186	1
HIT'nDRIVE-OptDis	PRAD	Taylor-2010	29	131	0.78	0.882619	0.92
HIT'nDRIVE-OptDis	PRAD	SMMU-PC	65	66	0.76	0.893256	0.94
HIT'nDRIVE-OptDis	BRCA	TCGA-BRCA	113	1102	0.94	0.9884	0.99
HIT'nDRIVE-OptDis	BRCA	METABRIC-CAMBRIDGE	144	997	0.83	0.9048	0.92
HIT'nDRIVE-OptDis	BRCA	METABRIC-VANCOUVER	144	995	0.83	0.9052	0.92
HIT'nDRIVE-OptDis	BRCA	Richardson-2006	7	40	0.61	0.7854	0.85
DriverNet	GBM	TCGA-GBM	10	309	0.93	0.983333	1
DriverNet	GBM	Murat-2008	177	80	0.53	0.731333	0.84
DriverNet	GBM	Sun-2006	27	77	0.65	0.798	0.88
DriverNet	OV	TCGA-OV	32	457	0.87	0.976	1
DriverNet	OV	Yoshihara-2009	10	43	0.72	0.886333	0.96
DriverNet	OV	Bowen-2009	12	12	0.42	0.791333	0.92
DriverNet	PRAD	TCGA-PRAD	50	333	0.75	0.820667	0.86
DriverNet	PRAD	Grasso2012-PC	28	59	0.55	0.760333	0.91
DriverNet	PRAD	Grasso2012-CRPC	28	35	0.78	0.925667	0.98
DriverNet	PRAD	Taylor-2010	29	131	0.66	0.75	0.86
DriverNet	PRAD	SMMU-PC	65	66	0.5	0.662333	0.73
DriverNet	BRCA	TCGA-BRCA	113	1102	0.83	0.943667	0.97
DriverNet	BRCA	METABRIC-CAMBRIDGE	144	997	0.79	0.860333	0.89
DriverNet	BRCA	METABRIC-VANCOUVER	144	995	0.78	0.858333	0.89
DriverNet	BRCA	Richardson-2006	7	40	0.47	0.643667	0.76
