# Supplementary material for: HIT'nDRIVE: patient-specific multidriver gene prioritization for precision oncology
Source: HighWire-hosted journal article supplement (doi:10.1101/gr.221218.117), 2017-07-18
Supplement: Supplemental_Table_S15.xlsx [file Supplemental_Table_S15.xlsx]

## Sheet: Supplemental_Table_S15
Supplemental Table S15. BRCA subtype specific driver seeded modules of TCGA-BRCA.
Subtype	Module	Seed	Genes
Basal	BASAL-01	GATA3,KATNAL1	FOXA1,GATA3,XBP1,COX17,KATNAL1,SCO2,STAT6,TFF3,THY1
Basal	BASAL-02	NCOA3	AR,NCOA3,SPDEF,TFF1,XBP1
Basal	BASAL-03	MAP3K1	AR,FOXA1,MAP3K1,SP1,VAV3
Basal	BASAL-04	LRBA	ESR1,LRBA,UBC,XBP1,ZFYVE16
Basal	BASAL-05	MUC16	B3GNT5,MUC16
Basal	BASAL-06	APOB	APOB,ESR1,F7,RARA,SP1,APOF,FOXA1,UBC,YBX1
Basal	BASAL-07	E2F3	E2F3
Basal	BASAL-08	COL1A1	COL18A1,COL1A1,ESR1,FOXA1,MSX2
Basal	BASAL-09	PIK3C2B	INPP4B,INPP5J,PIK3C2B
Basal	BASAL-10	TRIO	RHOB,RND1,TRIO
Basal	BASAL-11	DNAH6	DNAH5,DNAH6,DNAL1,DNALI1
Basal	BASAL-12	SLC34A1	SLC22A5,SLC34A1,SLC4A8,SLC9A3R1,SLC9A3R2
Basal	BASAL-13	GABBR2	GABBR2
Basal	BASAL-14	GNAS	ESR1,GNAS,RAPGEF3,TFF1,VIPR1
Basal	BASAL-15	AKAP6	ABCC8,AKAP6,KCNJ11,RAPGEF3,RND1,RRAS
Basal	BASAL-16	ALCAM	ALCAM,CD6,FOXA1,MAPK3,NRIP1,SDC1,SDCBP
Basal	BASAL-17	SLC25A17	ESR1,NCOA2,PEX11A,PEX19,SLC25A17
Basal	BASAL-18	MDGA2	MDGA2
Basal	BASAL-19	SCN2A	ERBB4,SCN2A,SCN4B,SCNN1A,WWP1,EGFR,ESR1,FGF13,TFF3
Basal	BASAL-20	NRXN2	AR,DLG4,ERBB4,MDM2,NLGN1,NRXN2
Basal	BASAL-21	NSD1	NSD1,PLOD1,SUV39H2
Basal	BASAL-22	GPR98	GPR98,LIN7A,PDZD7,USH1C,USH2A
Basal	BASAL-23	LCT	B3GNT5,B4GALT2,FUT8,LCT,ST3GAL6
Basal	BASAL-24	RPGR	FOXA1,KLK3,LATS2,NPHP4,RPGR,RPGRIP1,SPDEF,ADCY9,BCL2,PDE6D,RAP1A,XBP1
Basal	BASAL-25	MGAM	MGAM,MLPH,MYH14,RHOB,WDTC1
Basal	BASAL-26	KCNQ5	ESR1,KCNQ5,KCNS3,PGR,PRKACB
Basal	BASAL-27	ARHGAP26	ARHGAP26,RHOB,SOS1,TFF3,VAV3
Basal	BASAL-28	FMN1,FMN2	CTNNB1,FMN1,FMN2,SPIRE1,TFF1,TFF3
Basal	BASAL-29	SPAG17	AR,KPNB1,SMAD3,SPAG17,SPAG6
Basal	BASAL-30	PARD3B	GPSM2,INSC,PARD3,PARD3B,RGMA,SMURF1
Basal	BASAL-31	DPP6	DPP6,KCND2,KCNG1,KCNQ4,KCNS1,NCS1
Basal	BASAL-32	DMXL2	DMXL2,FOXA1,INS,RAB3GAP1,RAB3GAP2,VAMP2
Basal	BASAL-33	GALNTL6	B3GNT5,GALNT10,GALNT7,GALNTL6,ST6GALNAC1
Basal	BASAL-34	CATSPERG	AR,CATSPER3,CATSPERG,KCNU1,PRKX
Basal	BASAL-35	DPP10	DPP10,KCNIP3,NOTCH1,PSEN1,SPDEF,WWP1
Basal	BASAL-36	PHF11	AR,PHF11,PLOD1,SETD7,SETDB2
Basal	BASAL-37	TBC1D5	AR,LPIN1,MOGAT3,SREBF1,TBC1D5
Her2	HER2-01	NCOA3	ERBB2,GRB7,NCOA3
Her2	HER2-02	SCN2A	AKT1,FGF13,FGFR4,GRB7,SCN2A
Her2	HER2-03	INTS4	GRB7,HAX1,INTS4,KIAA0513,PSMD3,SHFM1
Her2	HER2-04	DMD,DTNB	DMD,DTNB,GRB7,SRC,TCAP
Her2	HER2-05	ALCAM	ALCAM,CD6,ERBB2,MMP9,SDC1,SDCBP
Her2	HER2-06	KATNAL1	BCL2,CHCHD4,COX17,KATNAL1,PMAIP1,TOMM20
Her2	HER2-07	DMXL2	DMXL2,ERBB2,RAB3GAP1,RAB3GAP2,UBC,ZWINT
Her2	HER2-08	PARD3B	ERBB2,INSC,PARD3,PARD3B,PSMD3,SMURF1,UBA52
Her2	HER2-09	MDGA2	GRAP2,GRB7,MDGA2,SIGLEC14,TREM1,TYROBP
Her2	HER2-10	PHF11	ERBB2,HIF1A,P4HB,PHF11,PLOD3,SETDB2
Her2	HER2-11	GPR98	ERBB2,GPR98,HSP90AA1,NINL,PDZD7,USH2A
Her2	HER2-12	MED1,SLC25A17	ERBB2,MED1,PEX11A,PEX19,PGR,SLC25A17
Her2	HER2-13	NRXN2	DLG4,GRB2,GRB7,NLGN1,NRXN2
Her2	HER2-14	FMN1,FMN2	CTNND1,ERBB2,FMN1,FMN2,IGF1R,SPIRE1
Her2	HER2-15	DPP10	DPP10,ERBB2,ESR1,KCNIP3,PSEN2
Her2	HER2-16	DPP6	DPP6,GFRA1,GRB7,KCNC2,KCND2,PRKACA
Luminal-A	LUMA-01	BRCA2	AURKB,BRCA2,UBE2C
Luminal-A	LUMA-02	E2F3	CCNA2,E2F3,MYBL2,RRM2
Luminal-A	LUMA-03	ATAD5	ATAD5,DNA2,GEN1,PIF1,RFC4
Luminal-A	LUMA-04	CBX8	CBX2,CBX8,CENPE,PRC1,UBE2C,UBE2S
Luminal-A	LUMA-05	CDC16	CCNB2,CDC16,PTTG1,TTK,UBE2C
Luminal-A	LUMA-06	USP32	CDC20,CDK1,TRIP13,UBE2S,USP10,USP32
Luminal-A	LUMA-07	KSR1	CCNB2,CDC25B,KSR1,MYBL2,YWHAQ,BUB1,PPP2CA,RFC4,TTK,YWHAZ
Luminal-A	LUMA-08	PPP2R3A	CDC45,CDC6,PPP2R3A
Luminal-A	LUMA-09	RSRC1	CDCA8,RPS27,RSRC1,SGOL1,ZWINT,BLM,MAGOH,RAD51,RPSA,UBE2T
Luminal-A	LUMA-10	NCOA3	CCNB2,CDK8,FOXM1,NCOA3,PLK1,WNT10B
Luminal-A	LUMA-11	INTS4	CDC20,INTS4,PSMD7,SGOL1,SHFM1
Luminal-A	LUMA-12	USP9X	CDK1,TK1,TYMS,UBE2C,UNK,USP9X,FOXM1,MYBL2,SKP2,UBE2D1
Luminal-A	LUMA-13	PAPOLA	PAPOLA,PLK1,SNRPA1,TPX2,UBA52,UBE2C,UPF3B
Luminal-A	LUMA-14	CES1	CDC45,CES1,E2F1,MYBL2,TFDP1
Luminal-A	LUMA-15	CDK12	CCNK,CDC45,CDK12,CDK2,UBE2C,AURKA,KPNA2,NCBP2,SUPT5H,TPX2,CCNL1,MCM2,RFC4,TIMELESS,WDHD1
Luminal-A	LUMA-16	CNOT1	CNOT1,NDC80,SKA1,TTK,UBC,CDC7,CHAF1A,MCM10,TOB1
Luminal-A	LUMA-17	TP53	CLSPN,MCM10,RRM2,TP53,YWHAZ
Luminal-A	LUMA-18	CECR2	CDC45,CECR2,CHRAC1,GINS1,POLE2,CENPN,CENPO,OIP5,SMARCA5
Luminal-A	LUMA-19	SCN2A	CALM2,KIF18A,KNTC1,SCN2A,SKA1,SKA3
Luminal-A	LUMA-20	UBE3A	DNMT3B,NCAPG,NCAPH,SAP30,UBE3A
Luminal-A	LUMA-21	TRIP12	AURKB,PSMC6,PTTG1,TRIP12,UBE2T
Luminal-A	LUMA-22	GABBR2	AURKB,GABBR2,GNGT1,RACGAP1,SOS1
Luminal-A	LUMA-23	NSD1	MYBL2,NSD1,PCNA,PLOD1,SETD8,SUV39H2
Luminal-A	LUMA-24	TBC1D5	CCNB1,LPIN1,MOGAT3,MYBL2,TBC1D5,UBE2C
Luminal-A	LUMA-25	ROCK1	AURKB,CDC25A,KIF4A,ROCK1,SH3GL2
Luminal-A	LUMA-26	WWOX	AURKB,STMN1,TPX2,UBC,WWOX,ZNF598,ZWINT
Luminal-A	LUMA-27	AGAP1	AGAP1,AURKB,CEP55,KIF23,RHOA
Luminal-A	LUMA-28	GATA3	FANCA,FANCI,GATA3,UBE2T,ZBTB32
Luminal-A	LUMA-29	PIK3R1	CDC45,PIK3R1,TOPBP1,UBE2T,YWHAZ
Luminal-A	LUMA-30	SMARCA2	AURKB,H2AFX,LMNB1,NCAPH,SMARCA2,TOP2B
Luminal-A	LUMA-31	LCT	BIRC5,HIF1A,HK1,LCT,SGOL1
Luminal-A	LUMA-32	RYR2	CENPA,PPP1CC,RYR2,SGOL2,ZWINT
Luminal-A	LUMA-33	SIRPB1	IFNGR1,MCM10,MCM5,SIRPB1,STAT1,UBC,UBE2C
Luminal-A	LUMA-34	KDM4C	CHEK1,KDM4C,KLK3,MCM10,UBE2T,XRCC6
Luminal-A	LUMA-35	ANK2	ANK2,AURKA,KIF15,KIF26A,KIF2C,SPTBN2
Luminal-A	LUMA-36	PHF12	MELK,MYBL2,PHF12,RBL1,SIN3B
Luminal-A	LUMA-37	FMN1	BIRC5,CHEK1,CTNNB1,FMN1,SKA1,YWHAZ
Luminal-A	LUMA-38	DNAH6	CLIP1,DNAH6,NDC80,PLK1,ZWINT
Luminal-A	LUMA-39	MACF1	AXIN1,ESPL1,MACF1,PSMD14,SGOL1
Luminal-A	LUMA-40	SPAG17	KPNB1,NDC80,NUP85,RANBP1,SPAG17,SPAG6,TPX2
Luminal-A	LUMA-41	MGAM	FEN1,HSPD1,MGAM,RAD51,RAD54L,WDTC1,XRCC3
Luminal-A	LUMA-42	GNAS	BIRC5,GNAS,GTSE1,PLK1,SCTR,VIPR2
Luminal-A	LUMA-43	SLC25A17	CDKN2A,E2F1,E2F2,NCAPG,PEX19,SLC25A17,UBC
Luminal-B	LUMB-01	DMD,DTNB,COL14A1,SCN2A,CHL1,DNAH8,SYNJ2,GNAS	DMD,DTNB,LAMC2,TPM1,VIM,COL14A1,LAMB3,MMP2,MMP7,EGFR,FGF13,SCN2A,SCN5A,CHL1,FYN,TPM2,VCL,DNAH8,FBLIM1,MYBPC1,MYH14,VASP,WDTC1,PLCD1,RAC1,SFRP1,SYNJ2,WNT11,CHRM1,GNAS,GRAMD3,SCTR
Luminal-B	LUMB-02	ATAD5	ATAD5,RAD17,TIMELESS
Luminal-B	LUMB-03	UBE3A	CBX4,ESPL1,ESR1,UBE2C,UBE2S,UBE3A
Luminal-B	LUMB-04	USP32	CDC25C,KRT18,TIMELESS,USP32,YWHAB,YWHAZ
Luminal-B	LUMB-05	PIK3R1	MYC,PIK3R1,SFRP1,TCF7L1,ZYX
Luminal-B	LUMB-06	CBX8	BRCA1,CBX8,CDC45,TIMELESS,TYMS,UBE2C
Luminal-B	LUMB-07	CNTN1	CNTN1,NOTCH1,SFRP1,SOX10,WNT5A
Luminal-B	LUMB-08	PPP2R3A	PPP1CB,PPP1R15A,PPP2R3A,RGMA
Luminal-B	LUMB-09	COL1A1	COL17A1,COL1A1,LAMB3,LEPRE1,LEPREL1
Luminal-B	LUMB-10	TP53,AHNAK	PROM1,SERPINB5,TP53,AHNAK,EGFR,FGF2,GSTP1,S100B
Luminal-B	LUMB-11	KDM4C	KDM4C,KLK3,TCF4,TCF7L1,TCF7L2
Luminal-B	LUMB-12	MUC16	B3GNT5,MUC16,MUC7,ST6GAL1
Luminal-B	LUMB-13	PTEN	CLSPN,PTEN,SLC9A3R1,TIMELESS,USP7
Luminal-B	LUMB-14	RPGR	CANT1,MCM2,PDE6D,RPGR,RRM1,TIMELESS
Luminal-B	LUMB-15	MAP3K1	IFNGR1,JUN,KRT17,MAP3K1
Luminal-B	LUMB-16	CDH13,CDH1	CDH13,CDH3,CTNNB1,CTNND1,EGFR,TCF7L1,CDH1,KLK7,SFRP1,WNT7A
Luminal-B	LUMB-17	APBA1	ANXA1,APBA1,APP
Luminal-B	LUMB-18	APOB	APOB,EGFR,LRP6,SDC3,SFRP1,WNT6
Luminal-B	LUMB-19	DSPP	BMP2,DSPP,RGMA,RUNX2,SOSTDC1,YAP1
Luminal-B	LUMB-20	PAPOLA	FOS,KRT17,KRT5,MAGOH,PAPOLA
Luminal-B	LUMB-21	ARHGAP26	ARHGAP26,ARHGEF4
Luminal-B	LUMB-22	DNAH6	CLIP1,DNAH6,ESPL1,SPC24,ZWINT
Luminal-B	LUMB-23	RIMS1	ESPL1,FKBP4,HSPA8,RIMS1,XPO1
Luminal-B	LUMB-24	GPR98	GPR98,NINL,PDZD7,PLK1,RACGAP1,TUBG1,USH2A
Luminal-B	LUMB-25	CNGB1	CNGA1,CNGB1
Luminal-B	LUMB-26	CNOT1	CNOT1,E2F1,TIMELESS,TNRC6C,TOPBP1
Luminal-B	LUMB-27	LRRK1	LRRK1,EGFR,GRB2,SPRY2,YES1
Luminal-B	LUMB-28	USP9X	SKI,SMAD4,TCF7L1,USP9X,YAP1
Luminal-B	LUMB-29	GUCY1B3	GUCY1B3,PRKG2,SFRP1,SOX9,WNT5B
Luminal-B	LUMB-30	CECR2	CECR2,CHRAC1,POLE2,RFC5,TIMELESS
Luminal-B	LUMB-31	KATNAL1	CHCHD4,COX17,HSP90AA1,KATNAL1,RAD1,TIMELESS,TOMM70A
Luminal-B	LUMB-32	LCT	EP300,ETS2,GCK,LCT,TCF7L1
Luminal-B	LUMB-33	PIK3C2B	EGFR,KIT,PIK3C2B,UBC,UBE2E3
Luminal-B	LUMB-34	GALNTL6	C1GALT1,EGFR,GALNTL6,MET,MUC20
Luminal-B	LUMB-35	INADL	CLDN1,CSDA,INADL,TJP1
Luminal-B	LUMB-36	MGAM	MGAM,RAD51,RAD54B,TIMELESS,TP53BP1,WDTC1
Luminal-B	LUMB-37	SPAG17	ESPL1,KPNB1,NUP85,SPAG17,SPAG6
Luminal-B	LUMB-38	AGAP1	AGAP1,EGFR,RHOA,TRIP10,ZYX
Luminal-B	LUMB-39	PHF12	HINT1,PHF12,SIN3B,SKI,TRIM29
