# Supplementary material for: HIT'nDRIVE: patient-specific multidriver gene prioritization for precision oncology
Source: HighWire-hosted journal article supplement (doi:10.1101/gr.221218.117), 2017-07-18
Supplement: Supplemental_Table_S16.xlsx [file Supplemental_Table_S16.xlsx]

## Sheet: Supplemental_Table_S16
Supplemental Table S16. Breast cancer sub-type classification accuracy in validation datasets using knn-1 classifier
BRCA Sub-type	Dataset	No. of Samples		Accuracy (Min)	Accuracy (Mean)	Accuracy (Max)
		Class I	Class II
Basal	TCGA-BRCA	97	424	0.95	0.97	0.98
	METABRIC-Cambridge	118	879	0.95	0.96	0.98
	METABRIC-Vancouver	213	776	0.88	0.9	0.93
Her2	TCGA-BRCA	58	463	0.86	0.91	0.94
	METABRIC-Cambridge	87	910	0.88	0.9	0.92
	METABRIC-Vancouver	153	836	0.8	0.81	0.83
Luminal-A	TCGA-BRCA	231	290	0.77	0.84	0.85
	METABRIC-Cambridge	466	531	0.69	0.78	0.8
	METABRIC-Vancouver	255	734	0.72	0.76	0.77
Luminal-B	TCGA-BRCA	127	394	0.67	0.8	0.83
	METABRIC-Cambridge	268	729	0.64	0.79	0.82
	METABRIC-Vancouver	224	765	0.65	0.8	0.84
