# Supplementary material for: HIT'nDRIVE: patient-specific multidriver gene prioritization for precision oncology
Source: HighWire-hosted journal article supplement (doi:10.1101/gr.221218.117), 2017-07-18
Supplement: Supplemental_Table_S17.xlsx [file Supplemental_Table_S17.xlsx]

## Sheet: Supplemental_Table_S17
Supplemental Table S17. TCGA-BRCA subtype specific driver modules significantly associated with patient survival outcome
Module	Seed Driver Gene	Module Genes	Hazard Ratio	Concordance Index	Logrank Test Pvalue
BASAL-02	NCOA3	AR,NCOA3,SPDEF,TFF1,XBP1	2.26806	0.557602	0.00510828
HER2-01	NCOA3	ERBB2,GRB7,NCOA3	1.81633	0.722248	0.00396364
HER2-11	GPR98	ERBB2,GPR98,HSP90AA1,NINL,PDZD7,USH2A	3.71913	0.556796	0.0060309
HER2-13	NRXN2	DLG4,GRB2,GRB7,NLGN1,NRXN2	3.04306	0.580105	0.00614714
LUMA-09	RSRC1	CDCA8,RPS27,RSRC1,SGOL1,ZWINT,BLM,MAGOH,RAD51,RPSA,UBE2T	2.64897	0.656583	0.00684303
LUMA-11	INTS4	CDC20,INTS4,PSMD7,SGOL1,SHFM1	3.67018	0.501885	0.00254436
LUMA-29	PIK3R1	CDC45,PIK3R1,TOPBP1,UBE2T,YWHAZ	1.8877	0.559838	0.00552488
LUMA-39	MACF1	AXIN1,ESPL1,MACF1,PSMD14,SGOL1	1.86544	0.546233	0.00375024
LUMB-23	RIMS1	ESPL1,FKBP4,HSPA8,RIMS1,XPO1	1.65346	0.53853	0.000152953
