# Supplementary material for: HIT'nDRIVE: patient-specific multidriver gene prioritization for precision oncology
Source: HighWire-hosted journal article supplement (doi:10.1101/gr.221218.117), 2017-07-18
Supplement: Supplemental_Table_S18.xlsx [file Supplemental_Table_S18.xlsx]

## Sheet: Supplemental_Table_S18
Supplemental Table S18. Drive genes identified by HIT'nDRIVE for cancer cell lines from Iorio et al. 2016 dataset
CancerType	CellLine	COSMIC_ID	DriverGenes
ALL	SUP-B15	1247871	DNAH6,HMCN1,TRPV3,USH2A
ALL	ALL-SIL	1295740	CDC42BPA,KALRN,NCR3LG1,RYR3
ALL	DND-41	1297446	COL14A1,CPSF1,CRTC1,DNMT3B,DUOX2,EGFR,ESPL1,HELZ,HMCN1,KALRN,LAMA3,LRP1,MBD6,MUC4,MYH2,NEB,PRPF8,RYR1,SIN3B,TP53,TRIO,USH2A,ZNF423
ALL	CCRF-CEM	905952	CDC42BPA,COL14A1,CPSF1,EGFR,FBN2,LAMA3,LRP1,LTBP1,MUC4,MYCBP2,MYH2,NEB,OBSCN,PCNT,PFKFB2,SRRM2,TP53
ALL	MOLT-4	905958	ABCA7,ARID1A,BCL11B,CDC42BPA,CDK12,CELSR1,COL14A1,CPSF1,CRTC1,DNAH6,DNAH8,DNAH9,DNMT3B,DUOX2,EGFR,ERCC6,ESPL1,FBN2,HELZ,HERC1,HMCN1,KALRN,LAMA3,LHX5,LRP1,LTBP1,LTBR,MBD6,MUC4,MYCBP2,MYH2,NEB,NID2,OBSCN,PCNT,PFKFB2,PRPF8,PYGM,RAD54L,RYR1,RYR3,SHANK2,SIN3B,SMC4,SRRM2,TLN2,TP53,TRIO,USH2A
ALL	BE-13	906763	FBN2,HMCN1,MYH2,NCR3LG1,TP53,USH2A
ALL	GR-ST	906877	ABCA7,BCL11B,CDC42BPA,CDK12,CELSR1,COL14A1,CPSF1,CRTC1,DNAH6,DNAH8,DNAH9,DNMT3B,DUOX2,EGFR,ERCC6,ESPL1,FBN2,LAMA3,LTBR,MBD6,MUC4,MYCBP2,MYH2,NEB,NID2,OBSCN,PCNT,PFKFB2,PYGM,RAD54L,RYR1,SHANK2,SIN3B,SMC4,SRRM2,TLN2,TP53,TRIO,USH2A
ALL	KARPAS-45	907272	ABCA7,ARID1A,CDC42BPA,CELSR1,COL14A1,CPSF1,DNAH6,DNAH8,DNAH9,DNMT3B,DUOX2,EGFR,ERCC6,ESPL1,FBN2,HERC1,HMCN1,KALRN,LAG3,LAMA3,LHX5,LRP1,LTBP1,LTBR,MUC4,MYCBP2,MYH2,NEB,OBSCN,PCNT,PRPF8,PYGM,RYR1,RYR3,SIN3B,SRRM2,TP53,TRIO,USH2A
ALL	KE-37	907277	DNAH8,ESPL1,HMCN1,MUC4,PCNT,TLN2,TP53
ALL	LC4-1	907787	ARID1A,DNAH8,DNAH9,DUOX2,MYH2,ZNF423
ALL	LOUCY	907789	HELZ,HERC1,NCR3LG1,TP53
ALL	MOLT-13	908146	DNAH6,DNAH8,ESPL1,HMCN1,MYCBP2,NID2,PCNT,RYR1,SRRM2,TP53
ALL	MOLT-16	908147	CDC42BPA,DNAH9,LTBR,MUC4,PCNT,PYGM,RAD54L,RYR3,SHANK2,TP53
ALL	P12-ICHIKAWA	909251	COL14A1,HERC1,HMCN1,MUC4,MYH2,OBSCN,TP53,USH2A
ALL	P30-OHK	909252	CDC42BPA,CELSR1,DNAH8,HMCN1,MUC4,MYCBP2,OBSCN,PFKFB2,PRPF8,PYGM,TLN2,USH2A
ALL	PF-382	909260	ABCA7,ALKBH7,ARID1A,BCL11B,CDC42BPA,CELSR1,DNAH6,FBN2,HELZ,KALRN,LAG3,LRP1,LTBP1,LTBR,MBD6,MUC4,MYCBP2,MYH2,NEB,NID2,OBSCN,PCNT,PYGM,RYR1,RYR3,SIN3B,SRRM2,TP53
ALL	RPMI-8402	909702	FBN2,LTBR,MBD6,RYR1,SNX33,TP53
ALL	RS4-11	909703	ABCA7,ARID1A,BCL11B,CDC42BPA,CDK12,CELSR1,COL14A1,CPSF1,CRTC1,DNAH6,DNAH8,DNAH9,DNMT3B,DUOX2,ERCC6,ESPL1,FBN2,HERC1,KALRN,LTBP1,LTBR,MUC4,MYCBP2,NEB,NID2,OBSCN,PCNT,PFKFB2,PRPF8,PYGM,RAD54L,RYR1,RYR3,SHANK2,SIN3B,SMC4,SRRM2,TLN2,TRIO,USH2A
ALL	SUP-T1	909743	CELSR1,CRTC1,CXADR,DNAH6,EGFR,HELZ,HERC1,HMCN1,KALRN,LAMA3,LRP1,LTBP1,MUC4,MYCBP2,NEB,OBSCN,PRPF8,RYR1,SIN3B,SRRM2,TP53,TRIO
ALL	ATN-1	910687	HMCN1,LAG3,LTBR,MUC4,SHANK2,TP53
ALL	ALL-PO	910944	DNMT3B,KALRN,MUC4,TP53
ALL	YT	946358	DNAH6,DNAH9,HMCN1,KALRN,MBD6,MUC4,MYH2,OBSCN
ALL	HAL-01	949153	KALRN,LRP1,MBD6,OBSCN,USH2A
ALL	Jurkat	998184	ABCA7,ARID1A,BCL11B,CDK12,CELSR1,CPSF1,DNAH6,DNAH8,DNAH9,DNMT3B,EGFR,ERCC6,ESPL1,FBN2,HERC1,HMCN1,KALRN,LAMA3,LRP1,MBD6,MYCBP2,MYH2,OBSCN,PCNT,PRPF8,RYR1,RYR3,SNX33,SRRM2,TP53,TRIO,ZNF423
BLCA	CAL-29	1290730	TP53
BLCA	5637	687452	LRP6,MUC16,OBSCN,RB1,TP53,VWCE,ZNF85
BLCA	RT4	687455	C3
BLCA	SW780	687457	IDE,ZNF423
BLCA	TCCSUP	687459	MUC16,OBSCN,TP53
BLCA	T-24	724812	OBSCN,TP53
BLCA	UM-UC-3	724838	MUC16,OBSCN,TP53
BLCA	DSH1	753552	OBSCN,TP53,UPK2
BLCA	J82	753566	C3AR1,RB1,TP53
BLCA	LB831-BLC	753584	RB1,TP53
BLCA	647-V	906797	MUC16,OBSCN,RB1,TP53,ZNF423
BLCA	639-V	906798	APLNR,C3,C3AR1,FPR2,GALR3,GP2,IDE,LRP6,MTNR1B,MUC16,OBSCN,RB1,SUCNR1,TP53,ZNF423,ZNF85
BLCA	HT-1197	907065	MUC16
BLCA	HT-1376	907066	RB1,TP53
BLCA	KU-19-19	907312	LRP6,MUC16
BLCA	RT-112	909704	C3,TP53
BLCA	SW1710	909749	MUC16,SLC26A4,TP53,ZNF85
BLCA	VM-CUB-1	909780	FPR2,LRP6,OBSCN,TP53
BLCA	BFTC-905	910926	MTNR1B,MUC16,OBSCN,TP53
BRCA	MDA-MB-436	1240172	OBSCN,RAD21,TP53
BRCA	EFM-192A	1290798	ERBB2,KRAS,PPM1D,RAD21,TP53
BRCA	HCC1428	1290905	GATA3,MDM2,MUC4,PCLO,PPM1D,RAD21
BRCA	HCC202	1290906	DPP6,ERBB2,MUC16,PCLO,TP53
BRCA	HDQ-P1	1290922	EGFR,GATA3,KRAS,L3MBTL1,MUC16,MUC4,OBSCN,RAD21,TP53
BRCA	JIMT-1	1298157	ERBB2,MUC16,PDE4DIP,TP53
BRCA	HCC1500	1303900	MUC4,OBSCN,PTEN
BRCA	MDA-MB-330	1330941	ERBB2,GATA3,MUC16,MUC4,TP53
BRCA	HCC1954	749709	ERBB2,FOXA1,MUC4,PCLO,RAD21,TP53
BRCA	HCC1143	749710	CEP290,EGFR,MDM2,RAD21,TP53
BRCA	HCC1187	749711	TP53
BRCA	HCC1395	749712	BRCA2,MUC16,PCLO,PTEN,TP53
BRCA	HCC1599	749713	BRCA2,DPP6,RAD21,TMPRSS6,TP53
BRCA	HCC1937	749714	KRAS,RAD21,TP53
BRCA	HCC2157	749715	CUBN,OBSCN,RAD21,TP53
BRCA	HCC2218	749716	ERBB2,PPM1D,RAD21,TP53
BRCA	HCC38	749717	EMB,PTEN,TP53
BRCA	T47D	905945	DMBT1,DSCAML1,EMB,PDE4DIP,TP53
BRCA	MCF7	905946	DSCAML1,GATA3,PPM1D
BRCA	BT-549	905951	PDE4DIP,PTEN,TP53
BRCA	Hs-578-T	905957	OBSCN,PCLO,PDE4DIP,TP53
BRCA	MDA-MB-231	905960	CWF19L2,KRAS,MUC16,OBSCN,TKTL1,TP53
BRCA	BT-20	906801	BRCA2,CEACAM8,EGFR,MUC4,PCLO,PTEN,TP53
BRCA	COLO-824	906812	MUC4,PLXNA3,TP53
BRCA	CAL-120	906826	DSCAML1,MDM2,MUC4,RAD21,TP53
BRCA	DU-4475	906844	PCLO,TKTL1
BRCA	EFM-19	906851	GATA3,GTPBP1,MUC16,TP53
BRCA	EVSA-T	906862	CUBN,EGFR,FOXA1,HAS1,MUC16,MUC4,PCLO,PTEN,RAD21,TP53
BRCA	HCC1419	907045	CEP290,CUBN,DMBT1,ERBB2,MUC4,PPM1D,RAD21,TP53
BRCA	HCC1569	907046	BRCA2,DMBT1,ERBB2,MDM2,MUC4,PCLO,PPM1D,PTEN,TP53
BRCA	HCC70	907048	EGFR,GATA3,MUC16,PCLO,PTEN,RAD21,TP53
BRCA	MDA-MB-361	908121	BRCA2,CEP290,CUBN,DMBT1,EGFR,ERBB2,IFI16,L3MBTL1,MUC16,MUC4,OBSCN,PCLO,PDE4DIP,PPM1D,RAD21,TP53
BRCA	MDA-MB-453	908122	CEACAM8,CUBN,DPP6,ERBB2,FOXA1,KRAS,MUC16,OBSCN,PPM1D,PTEN,RAD21
BRCA	MDA-MB-468	908123	BRCA2,EGFR,ERBB2,MUC4,OBSCN,PTEN,TP53
BRCA	MRK-nu-1	908151	BRCA2,GATA3,MUC16,OBSCN,PCLO,PDE4DIP,RAD21
BRCA	OCUB-M	909256	CEP290,CUBN,DPP6,ERBB2,MUC16,OBSCN,PLXNA3,PPM1D,RAD21,TP53
BRCA	UACC-893	909778	ERBB2,FOXA1,TP53
BRCA	ZR-75-30	909907	BRCA2,ERBB2,GTPBP1,MUC16,MUC4,PCLO,PPM1D,RAD21
BRCA	AU565	910704	EGFR,ERBB2,MUC4,OBSCN,PCLO,RAD21,TP53
BRCA	CAL-85-1	910852	BRCA2,CORO2B,CUBN,DMBT1,EGFR,IFI16,MARCO,MUC4,PDE4DIP,SLC7A9,TP53
BRCA	UACC-812	910910	DSCAML1,ERBB2,FOXA1,MDM2,MUC4
BRCA	CAL-51	910927	BRCA2,CUBN,DMBT1,MUC16,MUC4,OBSCN,PCLO,PLXNA3,PTEN,SERPIND1
BRCA	MFM-223	910948	CEP290,CORO2B,CWF19L2,MUC4,TP53
BRCA	CAL-148	924106	DSCAML1,MR1,MUC16,MUC4,OBSCN,PCLO,PDE4DIP,PTEN,TP53
BRCA	MDA-MB-415	924240	DPP6,MUC16,OBSCN,PCLO,PDE4DIP,PTEN,TP53
BRCA	MDA-MB-157	925338	CEP290,MUC16,MUC4,PDE4DIP,RAD21,TP53
BRCA	BT-474	946359	BRCA2,DPP6,ERBB2,FOXA1,MR1,MUC16,OBSCN,PDE4DIP,PPM1D,TP53
BRCA	CAMA-1	946382	IFI16,MUC4,PTEN,TP53
BRCA	BT-483	949093	FOXA1,GATA3,OBSCN,RAD21,TP53
BRCA	MDA-MB-436	1240172	BRWD1,FLG,RAD21,TP53
BRCA	EFM-192A	1290798	MED24,RAD21,TP53
BRCA	HCC1428	1290905	FLG,MUC4,PCLO,RAD21
BRCA	HCC202	1290906	DPP6,MED24,PCLO,TP53
BRCA	HDQ-P1	1290922	FLG,L3MBTL1,MUC4,RAD21,TP53
BRCA	JIMT-1	1298157	MED24,TP53
BRCA	HCC1500	1303900	DNAH7,FLG,MUC4
BRCA	MDA-MB-330	1330941	MED24,MUC4,TP53
BRCA	HCC1954	749709	MED24,MUC4,PCLO,RAD21,TP53
BRCA	HCC1143	749710	RAD21,TP53
BRCA	HCC1187	749711	TP53
BRCA	HCC1395	749712	BRCA2,KCNQ3,PCLO,TP53
BRCA	HCC1599	749713	BRCA2,DPP6,RAD21,TMPRSS6,TP53
BRCA	HCC1937	749714	RAD21,TP53
BRCA	HCC2157	749715	RAD21,TP53
BRCA	HCC2218	749716	MED24,RAD21,TP53
BRCA	HCC38	749717	EMB,TP53
BRCA	T47D	905945	DNAH7,DSCAML1,EMB,FLG,ITGA2,TP53
BRCA	MCF7	905946	BRWD1,DSCAML1,LAMA3
BRCA	BT-549	905951	TP53
BRCA	Hs-578-T	905957	PCLO,TP53
BRCA	MDA-MB-231	905960	BRWD1,CWF19L2,SRRM2,TKTL1,TP53
BRCA	BT-20	906801	BRCA2,CEACAM8,MUC4,PCLO,TP53
BRCA	COLO-824	906812	DNAH7,MUC4,PLXNA3,TP53
BRCA	CAL-120	906826	DSCAML1,MUC4,RAD21,TP53
BRCA	DU-4475	906844	DNAH7,PCLO,TKTL1
BRCA	EFM-19	906851	FLG,GTPBP1,TP53
BRCA	EVSA-T	906862	FLG,HAS1,LAMA3,MUC4,PCLO,RAD21,TP53
BRCA	HCC1419	907045	GREB1,MED24,MUC4,RAD21,TP53
BRCA	HCC1569	907046	BRCA2,BRWD1,DNAH7,FLG,LAMA3,MED24,MUC4,PCLO,SRRM2,TP53
BRCA	HCC70	907048	FLG,PCLO,RAD21,TP53
BRCA	MDA-MB-361	908121	BRCA2,BRWD1,DNAH7,FLG,IFI16,ITGA2,KCNQ3,L3MBTL1,LAMA3,MED24,MUC4,NSMAF,PCLO,RAD21,SRRM2,TP53
BRCA	MDA-MB-453	908122	CEACAM8,DNAH7,DPP6,FLG,MED24,RAD21
BRCA	MDA-MB-468	908123	BRCA2,MUC4,TP53
BRCA	MRK-nu-1	908151	BRCA2,BRWD1,DNAH7,ITGA2,KCNQ3,PCLO,RAD21,SRRM2
BRCA	OCUB-M	909256	DNAH7,DPP6,MED24,PLXNA3,RAD21,TP53
BRCA	UACC-893	909778	FLG,MED24,TP53
BRCA	ZR-75-30	909907	BRCA2,FLG,GTPBP1,MED24,MUC4,PCLO,RAD21
BRCA	AU565	910704	MED24,MUC4,PCLO,RAD21,TP53
BRCA	CAL-85-1	910852	BRCA2,BRWD1,CORO2B,FLG,IFI16,KCNQ3,LAMA3,MARCO,MUC4,SLC7A9,TP53
BRCA	UACC-812	910910	DSCAML1,FLG,MED24,MUC4,SRRM2
BRCA	CAL-51	910927	BRCA2,DNAH7,MUC4,NSMAF,PCLO,PLXNA3,SERPIND1
BRCA	MFM-223	910948	CORO2B,CWF19L2,MUC4,TP53
BRCA	CAL-148	924106	DSCAML1,FLG,ITGA2,LAMA3,MR1,MUC4,PCLO,SRRM2,TP53
BRCA	MDA-MB-415	924240	DPP6,FLG,PCLO,TP53
BRCA	MDA-MB-157	925338	MUC4,RAD21,TP53
BRCA	BT-474	946359	BRCA2,DNAH7,DPP6,MED24,MR1,SRRM2,TP53
BRCA	CAMA-1	946382	IFI16,MUC4,NSMAF,TP53
BRCA	BT-483	949093	DNAH7,RAD21,SRRM2,TP53
CESC	MS751	1240179	OBSCN
CESC	SISO	1240212	DNAH8,MUC4
CESC	HeLa	1298134	OBSCN,USH1G
CESC	C-33-A	687505	ABCA7,ANO1,MLL2,MUC4,OBSCN,RYR1
CESC	C-4-I	687506	MUC4,OBSCN
CESC	ME-180	687514	MLL2,MUC4,OBSCN,RYR1
CESC	SW756	724839	ABCA7,CEP250,DNAH8,HMCN1,MCM2,MUC4,OBSCN
CESC	Ca-Ski	906824	CEP250,DNAH8,MCM2,MLL2,RYR1
CESC	DoTc2-4510	906843	HMCN1,OBSCN
CESC	HT-3	907068	DIDO1,HMCN1,OBSCN,RYR1
CESC	CAL-39	924107	MCM2,MUC4
CESC	SiHa	930297	ABCA7,ANO1,PXMP2
CESC	SKG-IIIa	930298	DNAH8,MLL2,MUC4
CLL	EHEB	906854	CCT4,FAT1,LRP2,SETD2,TTC28
CLL	JVM-2	907269	HERC1,LRP2,NOD2,TNFRSF11B
CLL	JVM-3	907270	CCNF,CHD8,FAT1,PTPRM,SETD2,TTC28
COAD_READ	CCK-81	1240123	ADAM21,ADAMTS12,AKAP9,APC,B3GNT5,BIRC6,BRCA2,COL6A3,DISP1,DMD,DNAH11,DNAH3,DNAH6,DNAH8,DST,EIF4G1,GALNTL6,GPR98,HMCN1,KIR2DL4,LAMA1,LRP2,MDN1,MLL3,MUC16,MUC2,MUC5B,MYO15A,NEB,NRXN1,NUP205,PCDH15,PCSK5,RYR2,RYR3,SACS,SHPRH,SI,SYNE1,SYNE2,TG,TRIO,USH2A
COAD_READ	CL-40	1240124	APC,LCT,MUC19,MUC2,MUC5B,MUC6,RYR3,SYNE1
COAD_READ	MDST8	1240173	ADAMTSL2,ANK3,APC,ARID1A,BIRC6,COL14A1,DNAH11,DNAH14,DNAH3,DNAH6,FLNB,GPR98,LCT,LRP2,MLL3,NSD1,PKHD1,SHPRH,SLC3A1,SVIL,SYNE2,VPS13C
COAD_READ	CL-11	1290769	ANK3,APC,PCSK5
COAD_READ	CL-34	1290771	ANK3,APC,BRCA2,COL11A1,COL14A1,DMD,DNAH11,DNAH6,DNAH8,EIF4G1,FLNB,GALNT5,HMCN1,LAMA1,MDN1,MLL3,MUC16,MUC19,MUC2,MUC5B,MYCBP2,NEB,NRXN1,PCDH15,PDE11A,PKHD1,RYR2,RYR3,SHPRH,SLC3A1,SYNE1,SYNE2,TG
COAD_READ	HCC-56	1290907	BRCA2,COL6A3,DNAH3,DNAH6,DNAH8,HMCN1,LRP2,MLL3,MUC16,MYCBP2,PLIN4,RYR3,SYNE2,TG
COAD_READ	SNU-1040	1659823	ADAMTS3,AIM2,AKAP9,ANK3,APC,ARID1A,B3GNT5,BIRC6,BRCA2,CHD9,CKMT2,CNTNAP2,COL11A1,COL14A1,COL6A3,DISP1,DMD,DNAH11,DNAH14,DNAH3,DNAH6,DNAH8,DST,EIF4G1,EP300,FLNB,GALNT7,GALNTL6,GPR98,HMCN1,HOXA3,IL1RL1,LAMA1,LAMA2,LCT,LRP2,MDN1,MLL3,MUC16,MUC19,MUC2,MUC4,MUC5B,MUC6,MYCBP2,MYH3,MYO15A,NEB,NRXN1,NSD1,NUP205,PCDH15,PCLO,PCSK5,PDE11A,PDZD2,PKHD1,PLIN4,RYR2,RYR3,SACS,SHPRH,SI,SLC3A1,SORCS2,SVIL,SYNE1,SY…
COAD_READ	SNU-175	1659928	ADAMTS12,ADAMTS3,AKAP9,ANK3,APC,ARID1A,BRCA2,CHD9,COL11A1,COL14A1,COL6A3,DISP1,DMD,DNAH11,DNAH3,DNAH6,DNAH8,DST,EIF4G1,FLNB,GALNT7,GPR98,HMCN1,HOXA3,LAMA2,LCT,LRP2,MDN1,MLL3,MUC16,MUC19,MUC2,MUC4,MUC5B,MYCBP2,MYH3,MYO15A,NEB,NUP205,PABPC5,PCDH15,PCLO,PCSK5,PDE11A,PDZD2,PKHD1,PLIN4,RYR2,RYR3,SACS,SHPRH,SI,SORCS2,SVIL,SYNE1,SYNE2,TDRD6,TRIO,USH2A,VPS13C
COAD_READ	SNU-283	1659929	APC,CKMT2,GPR98,LAMA2,LCT,MLL3,MUC16,MUC4,MYCBP2,RYR2,SI,SYNE1
COAD_READ	SNU-407	1660034	ADAMTS12,B3GNT5,CLCA1,COL11A1,DISP1,DMD,DNAH8,DST,EIF4G1,EP300,GPR98,HMCN1,HOXA3,LAMA2,MDN1,MLL3,MUC16,MUC4,MUC5B,MYO15A,PCDH15,PCLO,PDZD2,RYR2,SI,SVIL,SYNE1,SYNE2
COAD_READ	SNU-61	1660035	ADAMTS12,ADAMTS3,ANK3,APC,DNAH8,HMCN1,MUC16,MUC5B,PCDH15,PCLO
COAD_READ	SNU-81	1660036	ADAM21,ADAMTS3,ADAMTSL2,AIM2,AKAP9,ANK3,APC,ARID1A,B3GNT5,BIRC6,BRCA2,CHD9,CLCA1,CNTNAP2,COL11A1,COL14A1,COL6A3,DISP1,DMD,DNAH11,DNAH14,DNAH3,DNAH6,DNAH8,DST,EIF4G1,EP300,FLNB,GALNT13,GALNT5,GALNT7,GALNTL2,GALNTL6,GCNT4,GPR98,HMCN1,IL1RL1,KIR2DL4,LAMA1,LAMA2,LCT,LRP2,LRRC40,MDN1,MLL3,MUC15,MUC16,MUC19,MUC2,MUC21,MUC4,MUC5B,MUC6,MYCBP2,MYH3,MYO15A,NEB,NRXN1,NSD1,NUP205,PABPC5,PCDH15,PCLO,PCSK5,PDE…
COAD_READ	SNU-C5	1674021	AKAP9,ANK3,APC,ARID1A,BRCA2,CHD9,CNTNAP2,COL14A1,DISP1,DNAH11,DNAH14,DNAH3,DNAH6,DNAH8,DST,EIF4G1,EP300,FLNB,GPR98,HMCN1,LAMA1,LAMA2,LCT,MDN1,MLL3,MUC16,MUC4,MYCBP2,MYH3,MYO15A,NEB,NRXN1,PCDH15,PCSK5,PKHD1,RYR3,SACS,SVIL,SYNE1,SYNE2,TRIO,USH2A,WBSCR17
COAD_READ	HCT-116	905936	ADAM21,BRCA2,DISP1,DNAH3,DNAH8,DST,EP300,GPR98,LAMA2,LRP2,MDN1,MLL3,MUC16,MUC19,MUC2,MUC4,MYCBP2,MYH3,NEB,NUP205,PCDH15,PCLO,PDZD2,RYR2,RYR3,SHPRH,SI,SVIL,SYNE1,SYNE2,TDRD6
COAD_READ	HCT-15	905937	AKAP9,ANK3,APC,BIRC6,BRCA2,CHD9,CKMT2,CLCA1,CNTNAP2,COL11A1,COL14A1,DNAH11,DNAH14,DNAH3,DNAH6,DNAH8,DST,EIF4G1,EP300,FLNB,GALNT13,GALNTL2,GALNTL6,GPR98,HMCN1,HOXA3,IL1RL1,LAMA1,LAMA2,LCT,LRP2,LRRC40,MDN1,MLL3,MUC16,MUC19,MUC2,MUC4,MUC5B,MUC6,MYCBP2,MYO15A,NEB,NRXN1,NSD1,NUP205,PCDH15,PCLO,PCSK5,PDZD2,PKHD1,POC1B,RYR2,RYR3,SACS,SHPRH,SI,SLC3A1,SVIL,SYNE1,SYNE2,TDRD6,TG,UPK1B,USH2A,VPS13C,WBSCR17
COAD_READ	HT-29	905939	APC,CHD9,DISP1,DMD,MLL3,MUC16,NEB,NUP205,PDZD2,SACS,USH2A
COAD_READ	COLO-205	905961	APC,NEB,SACS,TG
COAD_READ	SW620	905962	APC,COL11A1,DNAH8,EP300,LAMA2,MDN1,MUC5B,NEB,PCDH15,PCLO,PDZD2,PKHD1,RYR3,SYNE1,SYNE2,TRIO,WBSCR17
COAD_READ	HCC2998	905971	ADAM21,ADAMTS12,ADAMTS3,AIM2,AKAP9,ANK3,APC,ARID1A,BIRC6,BRCA2,CHD9,CLCA1,CNTNAP2,COL11A1,COL14A1,COL6A3,DISP1,DMD,DNAH11,DNAH14,DNAH3,DNAH6,DNAH8,DST,EIF4G1,EP300,FLNB,GALNT13,GALNTL2,GALNTL6,GPR98,HMCN1,IL1RL1,LAMA1,LAMA2,LCT,LIAS,LRP2,LRRC40,MDN1,MLL3,MUC15,MUC16,MUC2,MUC4,MUC5B,MYCBP2,MYH3,MYO15A,NEB,NRXN1,NSD1,NUP205,PABPC5,PCDH15,PCLO,PCSK5,PDE11A,PDZD2,PKHD1,RYR2,RYR3,SACS,SHPRH,SI,SLC3A1,…
COAD_READ	KM12	905989	ADAMTS12,ADAMTSL2,ANK3,APC,ARID1A,BIRC6,BRCA2,CHD9,CLCA1,CNTNAP2,COL6A3,DNAH14,DNAH3,DNAH6,EIF4G1,EP300,HMCN1,LAMA1,LRP2,LRRC40,MLL3,MUC16,MUC19,MUC2,MUC4,MUC5B,NRXN1,PCDH15,PCSK5,PLIN4,RYR2,RYR3,SYNE1,SYNE2,TG,TRIO,USH2A
COAD_READ	HT55	907287	ADAM21,AKAP9,APC,COL6A3,DMD,GPR98,HMCN1,LAMA2,LCT,LRP2,MDN1,MLL3,MUC16,MUC4,NEB,PCDH15,PCSK5,PDE11A,RYR2,SHPRH,SYNE1,USH2A
COAD_READ	HT-115	907289	ADAM21,ADAMTS12,ADAMTS3,AKAP9,ANK3,APC,BIRC6,BRCA2,CNTNAP2,COL11A1,COL6A3,DMD,DNAH11,DNAH14,DNAH3,DNAH6,DNAH8,DST,EIF4G1,EP300,GALNT13,GALNT5,GCNT4,GPR98,HMCN1,IL1RL1,LAMA1,LAMA2,LCT,LRP2,LRRC40,MLL3,MUC16,MUC19,MUC4,MUC6,MYO15A,NEB,NUP205,PCDH15,PCLO,PKHD1,PLIN4,POC1B,RYR2,RYR3,SACS,SHPRH,SI,SORCS2,SVIL,SYNE1,SYNE2,TDRD6,TG,TMEM27,TRIO,UPK1B,USH2A,VPS13C,WBSCR17
COAD_READ	GP5d	907291	ADAMTS12,ADAMTSL2,AKAP9,ANK3,APC,ARID1A,BIRC6,BRCA2,CHD9,COL11A1,COL14A1,COL6A3,DISP1,DMD,DNAH11,DNAH14,DNAH3,DNAH6,DNAH8,DST,EIF4G1,EP300,FLNB,GALNTL2,GPR98,HMCN1,HOXA3,LAMA1,LAMA2,LRP2,MLL3,MUC16,MUC19,MUC2,MUC4,MYCBP2,MYH3,NEB,NRXN1,NSD1,NUP205,PABPC5,PCDH15,PCLO,PCSK5,PDE11A,PDZD2,PKHD1,POC1B,RYR2,RYR3,SACS,SHPRH,SI,SLC3A1,SVIL,SYNE1,SYNE2,TDRD6,TRIO,USH2A,VPS13C
COAD_READ	LoVo	907790	ADAMTS12,AKAP9,ANK3,APC,ARID1A,CHD9,COL11A1,DMD,DNAH11,DNAH14,DNAH6,DST,GPR98,HMCN1,LAMA1,LCT,LIAS,MDN1,MLL3,MUC16,MUC19,MUC6,MYO15A,NEB,NUP205,PABPC5,RYR2,RYR3,SHPRH,SI,SLC3A1,SORCS2,SVIL,SYNE1,TDRD6,TRIO,USH2A
COAD_READ	LS-123	907792	AKAP9,APC,SYNE1,WBSCR17
COAD_READ	LS-411N	907794	ADAMTS12,ADAMTS3,ADAMTSL2,AKAP9,ANK3,APC,ARID1A,BIRC6,BRCA2,CHD9,CNTNAP2,COL11A1,COL14A1,COL6A3,DMD,DNAH11,DNAH14,DNAH8,DST,EIF4G1,EP300,FLNB,GPR98,HMCN1,HOXA3,KIR2DL4,LAMA1,LAMA2,LRP2,LRRC40,MDN1,MLL3,MUC16,MUC19,MUC2,MUC4,MUC5B,MYCBP2,MYH3,MYO15A,NEB,NRXN1,NSD1,NUP205,PCDH15,PCLO,PCSK5,PDE11A,PDZD2,PKHD1,POC1B,RYR2,RYR3,SACS,SHPRH,SVIL,SYNE2,TDRD6,TG,TRIO,USH2A,VPS13C
COAD_READ	LS-513	907795	COL6A3,GPR98,HMCN1,MUC2,NEB,PDZD2,RYR2,USH2A
COAD_READ	NCI-H747	908457	ADAM21,APC,DNAH3,MLL3,MUC6,NEB,PCDH15,USH2A
COAD_READ	NCI-H716	908458	COL6A3,DNAH11,DNAH14,HMCN1,MUC16,MUC2,MUC4,PDZD2,PLIN4,RYR3,SYNE1,SYNE2
COAD_READ	NCI-H630	908482	APC,B3GNT5,BIRC6,BRCA2,CHD9,COL11A1,COL14A1,COL6A3,DMD,DNAH11,DNAH14,DNAH3,DNAH6,DST,EP300,FLNB,GALNTL6,GCNT4,HOXA3,IL1RL1,KIR2DL4,LAMA1,LAMA2,LRP2,MDN1,MLL3,MUC16,MUC19,MUC2,MUC4,MUC5B,MUC6,MYCBP2,MYH3,NRXN1,NSD1,PCLO,PCSK5,PDE11A,PDZD2,PKHD1,RYR2,RYR3,SI,SORCS2,SVIL,SYNE1,SYNE2,TDRD6,TRIO,VPS13C
COAD_READ	RCM-1	909263	APC,DISP1,EP300,LAMA1,MUC16,NSD1,PCLO,PDZD2,SACS,TRIO
COAD_READ	RKO	909698	ADAMTS12,AIM2,AKAP9,ANK3,ARID1A,BIRC6,BRCA2,CHD9,CNTNAP2,COL11A1,COL14A1,COL6A3,DISP1,DMD,DNAH11,DNAH14,DST,EIF4G1,EP300,FLNB,GALNTL2,GPR98,HMCN1,IL1RL1,KIR2DL4,LAMA1,LAMA2,LCT,LRP2,MDN1,MLL3,MUC16,MUC19,MUC4,MUC6,MYCBP2,MYH3,MYO15A,NEB,NRXN1,NSD1,NUP205,PCDH15,PCSK5,PDZD2,RYR3,SACS,SHPRH,SVIL,SYNE1,SYNE2,TDRD6,TG,TRIO,VPS13C
COAD_READ	SK-CO-1	909718	AKAP9,APC,DMD,DST,EP300,MUC2,MUC5B,PCDH15,RYR3,SACS,SVIL,SYNE1
COAD_READ	SNU-C2B	909740	ADAMTSL2,AKAP9,ANK3,CHD9,COL11A1,DST,EIF4G1,GPR98,HMCN1,KIR2DL4,LAMA1,LCT,LRP2,MDN1,MLL3,MUC16,MUC19,MUC6,MYCBP2,MYO15A,NEB,NRXN1,NUP205,PCLO,PDZD2,SACS,SHPRH,SI,SORCS2,SVIL,SYNE1,SYNE2,TG,VPS13C
COAD_READ	SW1116	909746	ADAMTS12,APC,DNAH6,GPR98,IL1RL1,MUC4,NEB,NRXN1,PABPC5,PCLO,PCSK5,RYR3,SYNE2
COAD_READ	SW1417	909747	ANK3,APC,CLCA1,EIF4G1,LRP2,MLL3,MUC16,NRXN1,PCSK5,PLIN4,SACS,SORCS2
COAD_READ	SW1463	909748	APC,DNAH14,GPR98,MUC16,SYNE1,USH2A,WBSCR17
COAD_READ	SW48	909751	ADAM21,ADAMTS3,AKAP9,ANK3,APC,BRCA2,CHD9,CLCA1,COL6A3,DMD,DNAH6,DNAH8,DST,EP300,GPR98,HMCN1,KIR2DL4,LAMA1,LAMA2,LCT,LRP2,LRRC40,MLL3,MUC16,MUC2,MUC4,MYO15A,NEB,PCLO,PCSK5,PDE11A,RYR2,RYR3,SORCS2,SYNE1,SYNE2,TG,TRIO,USH2A
COAD_READ	SW837	909755	APC,HMCN1,LAMA2,PCDH15,PCLO,SYNE1,TG
COAD_READ	SW948	909757	APC,ARID1A,EP300,GALNT13,GALNTL6,GPR98,MUC16,MYCBP2,PCLO,VPS13C,WBSCR17
COAD_READ	T84	909761	APC,BIRC6,MUC4,SYNE1
COAD_READ	CW-2	910554	ADAM21,ADAMTS12,ADAMTS3,ADAMTSL2,AIM2,AKAP9,ANK3,APC,ARID1A,B3GNT5,BIRC6,BRCA2,CHD9,CKMT2,CLCA1,CNTNAP2,COL11A1,COL14A1,COL6A3,DISP1,DMD,DNAH11,DNAH14,DNAH3,DNAH6,DNAH8,DST,EIF4G1,EP300,FLNB,GALNT13,GALNT5,GALNTL6,GPR98,HMCN1,HOXA3,LAMA1,LAMA2,LCT,LIAS,LRP2,LRRC40,MDN1,MLL3,MUC16,MUC19,MUC2,MUC4,MUC5B,MUC6,MYCBP2,MYH3,MYO15A,NEB,NRXN1,NSD1,NUP205,PCDH15,PCLO,PCSK5,PDE11A,PDZD2,PKHD1,PLIN4,RYR2,RY…
COAD_READ	COLO-320-HSR	910569	APC,BRCA2,DNAH14,MUC4,MUC5B,NEB,PDZD2,PKHD1,SYNE1
COAD_READ	COLO-678	910689	AIM2,APC,EIF4G1,LRP2,MUC16,MUC19,MUC4,NRXN1,PCDH15,SACS,SYNE1
COAD_READ	C2BBe1	910700	APC,DST,MLL3,MUC16,NRXN1
COAD_READ	SNU-C1	910905	APC,CNTNAP2,DNAH3,DNAH6,DNAH8,DST,LAMA1,LAMA2,MUC16,MYO15A,NEB,PCDH15,PCLO,PDE11A,PKHD1,RYR2,SACS,SYNE1,TG,USH2A
COAD_READ	LS-1034	917486	APC,GALNT13,MUC16,PLIN4,SVIL
COAD_READ	CaR-1	924108	ANK3,BIRC6,DMD,DNAH14,LRP2,MDN1,MUC5B,SLC3A1
COAD_READ	LS-180	998189	APC,ARID1A,BRCA2,CHD9,COL11A1,DST,EP300,GPR98,LRP2,MDN1,MUC16,MUC19,MUC2,MUC21,MUC4,MUC5B,MYCBP2,MYO15A,NEB,NRXN1,NUP205,PCDH15,PCLO,PKHD1,RYR2,SVIL,SYNE1,SYNE2,TDRD6,USH2A,WBSCR17
DLBC	Farage	1297449	CDH4,CDKN2A,FAT1,KIAA0368,LAMB2,MUC16,MUC4,PCSK5,TP53,USH2A
DLBC	GRANTA-519	1303897	CDKN2A,MLL2
DLBC	JEKO-1	1327765	MLL2,MUC4,SLC26A9,TP53
DLBC	JM1	1327768	CDKN2A,MLL2,MYC
DLBC	JSC-1	1327769	DSCAM,MUC16,PCSK5,USH2A
DLBC	KARPAS-1106P	1327773	CAPN10,CDKN2A,DYSF,MLL2
DLBC	NU-DUL-1	1330982	MLL2,MUC4,MYC,TP53
DLBC	OCI-LY-19	1330984	CDKN2A,LAMB2,MLL2
DLBC	RC-K8	1330995	CAPN10,CDH4,KIAA0368,MUC16
DLBC	SLVL	1331032	MUC4,PCSK5,TP53
DLBC	SU-DHL-10	1331033	MUC16,MYC,TP53,USH2A
DLBC	SU-DHL-16	1331034	MUC4,TP53
DLBC	SU-DHL-4	1331035	MUC4,TP53
DLBC	SU-DHL-5	1331036	FAT1,MYC,USH2A
DLBC	SU-DHL-6	1331037	FAT1,MLL2,TP53,USH2A
DLBC	SU-DHL-8	1331038	CDH4,DYSF,MLL2,MUC4,MYC,TP53
DLBC	TK	1331045	DSCAM,KIAA0368,MLL2,MUC4,TP53
DLBC	VAL	1331048	MUC16,MYC,USH2A
DLBC	WSU-DLCL2	1331050	FAT1,MUC16,TP53,USH2A
DLBC	OCI-LY7	1659819	PCSK5,TP53
DLBC	CRO-AP2	906807	MUC16,SLC26A9
DLBC	DB	906832	MLL2,TP53,USH2A
DLBC	DOHH-2	906842	CDKN2A,MUC4,MYC,USH2A
DLBC	KARPAS-422	907274	FAT1,MUC16,TP53
DLBC	MC116	907799	LAMB2,TP53
DLBC	TUR	909773	MLL2,TP53,USH2A
DLBC	RL	910861	FAT1,LAMB2,MUC16,PCSK5,TP53
DLBC	BC-1	910919	FAT1,LAMB2,MLL2
DLBC	SCC-3	910930	MUC16,PCSK5
DLBC	A4-Fuk	910934	CAPN10,DSCAM,LAMB2,MUC16,MUC4,MYC,PCSK5,TP53,USH2A
DLBC	A3-KAW	910935	CDKN2A,MUC16,MUC4,MYC,USH2A
DLBC	CTB-1	949088	CAPN10,CDKN2A,DSCAM,FAT1,MLL2,MYC
ESCA	KYSE-220	1240167	CCND1,FEZ2,KIF26B,MUC16,MUC4,RYR2,SYNE1,TP53
ESCA	KYSE-50	1298222	CCND1,MUC4,TP53
ESCA	OE21	1298359	CCND1,MUC16,TP53
ESCA	T-T	1299064	CCND1,CDH23,SACS,TP53
ESCA	FLO-1	1503361	FEZ2,RYR2,SYNE1,TP53
ESCA	OACp4C	1503362	SACS,TP53
ESCA	OACM5-1	1503363	KIF26B,MUC4,TP53
ESCA	SK-GT-4	1503365	CDH23,MCOLN1,TP53
ESCA	ESO26	1503366	FEZ2,TP53
ESCA	ESO51	1503367	MUC4,TP53
ESCA	KYAE-1	1503368	L3MBTL1,SACS,SLC6A18,SYNE1,TP53
ESCA	TE-4	1503371	CDH23,KIF26B,MUC16,MUC4,RYR2,SACS,TP53
ESCA	TE-5	735784	CATSPERB,CDH23,MCOLN1,MUC16,PLEC,RYR2,SACS,TP53
ESCA	EC-GI-10	753555	CATSPERB,CCND1,MUC4,TP53
ESCA	HCE-4	753559	CCND1,MUC4,SYNE1,TP53
ESCA	KYSE-140	753573	CCND1,CDH23,GREB1,MUC4,RYR2,TP53
ESCA	KYSE-410	753574	CCND1,MCOLN1,MUC16,MUC4,RYR2,TP53
ESCA	KYSE-520	753575	RYR2,SYNE1,TP53
ESCA	KYSE-70	753576	PLEC,SYNE1,TP53
ESCA	TE-15	753614	CATSPERB,MUC16,MUC4,SYNE1,TP53
ESCA	TE-1	753621	KIF26B,MUC16,TP53
ESCA	TE-10	753622	CCND1,MUC4,SYNE1,TP53
ESCA	TE-8	753623	CCND1,MUC16,PLEC,RYR2,TP53
ESCA	COLO-680N	906817	CATSPERB,TP53
ESCA	KYSE-150	907317	CCND1,CDH23,KIF26B,MCOLN1,SACS,SYNE1,TP53
ESCA	KYSE-180	907318	CCND1,CDH23,MUC16,MUC4,SYNE1,TP53
ESCA	KYSE-270	907319	CATSPERB,CHRNA2,MUC4,SYNE1,TP53
ESCA	KYSE-450	907320	MUC16,MUC4,SYNE1,TP53
ESCA	KYSE-510	907321	CCND1,CDH23,GREB1,MUC16,MUC4,RYR2,TP53
ESCA	OE19	910079	CATSPERB,KIF26B,MUC16,TP53,USH1G
ESCA	OE33	910549	PLEC,TP53
ESCA	TE-9	946353	CCND1,MUC16,PLEC,SACS,SYNE1,TP53
ESCA	TE-11	946354	CCND1,L3MBTL1,PLEC,RYR2,TP53
ESCA	TE-6	946355	CCND1,MUC16,MUC4,PLEC,TP53
ESCA	TE-12	946356	CCND1,CDH23,TP53
GBM	LN-18	1240168	CDKN2A,MUC5B,NEB,PIK3CB,TP53
GBM	LN-229	1240169	CDKN2A,EGFR,MUC5B,TP53
GBM	LNZTA3WT4	1240170	MUC5B,NEB,NTNG1,PTEN,TP53
GBM	42-MG-BA	687561	CDKN2A,PTEN,RB1,TP53
GBM	8-MG-BA	687562	DOPEY2,NF1,PTEN,TP53
GBM	A172	687563	CDKN2A,EGFR,NEB,PIK3CB,RB1
GBM	GB-1	687568	CDKN2A,DOPEY2,MUC5B,NEB,NF1,TP53
GBM	T98G	687586	CDKN2A,PTEN,TP53
GBM	U-118-MG	687588	CDKN2A,PTEN,TP53
GBM	U-87-MG	687590	CDKN2A,NF1,PTEN
GBM	YKG-1	687592	CDKN2A,NF1,PIK3CA,PTEN,TP53
GBM	D-542MG	753549	EGFR,NF1,PTEN,RB1,TP53
GBM	SNB75	905982	DOPEY2,TP53
GBM	U251	905983	CDKN2A,NF1,PTEN,TP53
GBM	SF295	905985	CDKN2A,PTEN,TP53
GBM	SF268	905986	CDKN2A,EGFR,TP53
GBM	Becker	906746	CDKN2A,TP53
GBM	CCF-STTG1	906823	BRAF,EGFR,PTEN
GBM	DBTRG-05MG	906835	BRAF,CDKN2A,DOPEY2,EGFR
GBM	DK-MG	906839	CDKN2A,EGFR,NEB,PIK3CA,PTEN
GBM	GMS-10	906873	NF1,PIK3CB,PTEN,RB1,TP53
GBM	KS-1	907313	CDKN2A,DOPEY2,MUC5B,NF1
GBM	SF126	909712	CDKN2A,MUC5B,PTEN
GBM	SK-MG-1	909729	CDKN2A,NEB,NF1,RB1,TP53
GBM	SW1088	909745	CDKN2A,EGFR,TP53
GBM	YH-13	909905	CDKN2A,PIK3CA,TP53
GBM	LN-405	910694	EGFR,PTEN,RB1,TP53
GBM	AM-38	910933	BRAF,CDKN2A,MUC5B,NEB
GBM	CAS-1	910943	CDKN2A,DOPEY2,EGFR,PTEN,TP53
GBM	D-247MG	946367	CDKN2A,EGFR,NF1,PTEN
GBM	D-263MG	946368	CDKN2A,PTEN,TP53
GBM	D-392MG	946370	CDKN2A,PIK3CB,PTEN
GBM	D-423MG	946372	EGFR,PTEN,TP53
GBM	D-566MG	946377	CDKN2A,EGFR,MUC5B,NF1,PTEN,TP53
GBM	M059J	949094	PTEN,RB1,TP53
HNSC	BICR22	1240121	CTTN,FAT1,TP53
HNSC	BICR78	1240122	CDKN2A,MUC4,TP53
HNSC	JHU-011	1240161	CTTN,FAT1,TP53
HNSC	JHU-022	1240162	CTTN,FAT1,OBSCN,TP53
HNSC	OSC-20	1240196	FAT1,MUC4,PMS2,RETSAT,TP53
HNSC	PCI-15A	1240204	CTTN,EGFR,TP53
HNSC	PCI-38	1240205	CDKN2A,CTTN,PMS2,SMAD4,TP53
HNSC	PCI-6A	1240206	CDKN2A,GREB1,TP53
HNSC	PE/CA-PJ15	1240207	CDKN2A,CTTN,MUC4,TP53
HNSC	BICR10	1290724	CDKN2A,GPR98,RBAK
HNSC	BICR31	1290725	CDKN2A,CTTN,FAT1,PMS2,SMAD4,TP53
HNSC	JHU-029	1298156	CDKN2A,FASN,FAT1,MUC4,PMS2,TP53
HNSC	KON	1298215	CDKN2A,FAT1,GPR98,MUC4,OBSCN,RETSAT,TP53
HNSC	OSC-19	1298362	CTTN,EGFR,FAT1,GPR98,GREB1,PMS2,RETSAT,TP53
HNSC	PCI-30	1298529	CTTN,FAT1,TP53
HNSC	PCI-4B	1298531	CDKN2A,EGFR,OBSCN,PMS2,SMAD4,STS,TP53
HNSC	SAT	1299050	EGFR,GREB1,MUC4,TP53
HNSC	SCC90	1299052	DMBT1,MUC4,OBSCN
HNSC	SKN-3	1299059	CDKN2A,RETSAT,TP53
HNSC	BB30-HNC	753531	SMAD4,TP53
HNSC	BB49-HNC	753532	CDKN2A
HNSC	BHY	753535	CDKN2A,CTTN,FASN,FAT1,GPR98,OBSCN,TP53
HNSC	Ca9-22	753538	CDKN2A,EGFR,FAT1,GPR98,OBSCN,RETSAT,TP53
HNSC	CAL-33	753541	CDKN2A,DMBT1,FAT1,OBSCN,SMAD4,TP53
HNSC	HO-1-u-1	753561	FAT1,RETSAT,TP53
HNSC	HSC-2	753562	CDKN2A,EGFR,GPR98,MUC4,OBSCN,TP53
HNSC	KOSC-2	753570	CTTN,EGFR,TP53
HNSC	LB771-HNC	753583	CDKN2A,TP53
HNSC	Detroit562	906837	CTTN,PMS2,TP53
HNSC	FADU	906863	CDKN2A,CTTN,DMBT1,EGFR,FAT1,MUC4,TP53
HNSC	HN	907059	CDKN2A,EGFR,TP53
HNSC	HSC-3	907061	CDKN2A,FASN,FAT1,GPR98,RETSAT,SMAD4,TP53
HNSC	HSC-4	907062	CDKN2A,CTTN,EGFR,MUC4,PMS2,TP53
HNSC	RPMI-2650	909700	FASN
HNSC	SAS	909708	FASN,FAT1,GPR98,STS,TP53
HNSC	SCC-9	909709	CDKN2A,FAT1,PMS2,TP53
HNSC	SCC-25	910701	CDKN2A,CTTN,FAT1,GPR98,MUC4,TP53
HNSC	SCC-4	910904	CDKN2A,CTTN,MDGA2,MUC4,TP53
HNSC	SCC-15	910911	CTTN,EGFR,FAT1,MUC4,TP53
HNSC	CAL-27	910916	CDKN2A,DMBT1,FAT1,SMAD4,TP53
HNSC	DOK	910936	EGFR,MUC4,OBSCN,PMS2,TP53
HNSC	HO-1-N-1	924111	FAT1,MUC4,OBSCN,RETSAT,TP53
KIRC	SW156	1240220	ITGA7,MUC17,OBSCN,VHL
KIRC	KMRC-1	1298168	CDKN2A,OBSCN,PBRM1,TG
KIRC	KMRC-20	1298169	CDKN2A,PBRM1,VHL
KIRC	NCC010	1509073	CDKN2A,DOPEY1,ITGA7,MUC17,MUC4,OBSCN,PBRM1,VHL
KIRC	NCC021	1509074	CDKN2A,DOPEY1,MUC17,MUC4
KIRC	RCC-FG2	1524414	AKAP9,CDKN2A,DOPEY1,MLL3,OBSCN,PBRM1,SLC12A4,VHL
KIRC	RCC-JF	1524415	AKAP9,CDKN2A,VHL
KIRC	RCC-JW	1524416	CDKN2A,MLL3,SLC12A4
KIRC	RCC-ER	1524417	MUC4,PBRM1,VHL
KIRC	RCC-AB	1524418	CDKN2A,TG
KIRC	RCC-MF	1524419	CDKN2A,MLL3,MUC4,PBRM1
KIRC	BB65-RCC	753533	CDKN2A,VHL
KIRC	HA7-RCC	753558	CDKN2A,VHL
KIRC	LB1047-RCC	753577	CDKN2A,PBRM1
KIRC	LB2241-RCC	753578	CDKN2A
KIRC	LB996-RCC	753585	CDKN2A,MLL3
KIRC	786-0	905947	AKAP9,CDKN2A,MUC4,OBSCN,VHL
KIRC	A498	905948	CDKN2A,MLL3,VHL
KIRC	ACHN	905950	CDKN2A,PBRM1
KIRC	CAKI-1	905963	CDKN2A,OBSCN
KIRC	RXF393	905978	AKAP9,CDKN2A,MUC17
KIRC	SN12C	905979	CDKN2A,DOPEY1,MUC17,OBSCN
KIRC	TK10	905980	AKAP9,MLL3,MUC17,MUC4,TG
KIRC	U031	905981	CDKN2A
KIRC	OS-RC-2	909250	CDKN2A,OBSCN,PBRM1,VHL
KIRC	VMRC-RCZ	909781	CDKN2A,MUC4,VHL
KIRC	RCC10RGB	909974	CDKN2A,MUC4,SLC12A4
KIRC	BFTC-909	910698	CDKN2A,ITGA7,PBRM1,TG
KIRC	A704	910920	CDKN2A,MUC17,PBRM1,VHL
KIRC	769-P	910922	CDKN2A,MUC4,VHL
KIRC	CAL-54	910952	AKAP9,CDKN2A,ITGA7,MLL3
LAML	OCI-AML3	1290455	CDH23,OBSCN
LAML	NB-4	1323913	SPAG17,TP53
LAML	ME-1	1330942	ABI3BP,CEP350,TP53
LAML	MOLM-13	1330947	DNAH8,DOCK1,OBSCN
LAML	MOLM-16	1330948	MUC16,MUC4,NPTN,OBSCN,TP53
LAML	OCI-AML5	1330983	DOCK1,EZH2,ZNF423
LAML	OCI-M1	1330985	ATP2B2,DNAH17,MUC4,NPTN,TP53
LAML	PL-21	1330991	EZH2,MACF1,MUC4,OBSCN,TP53
LAML	CTV-1	753548	ATP2B2,CDH23,CEP350,DNAH17,DNAH8,DOCK1,EZH2,GLT25D2,HLX,LMF1,LRRC4,MACF1,MLL2,MUC16,MUC4,OBSCN,SLAMF6,SLC4A3,ZNF423
LAML	HL-60	905938	MUC16
LAML	GDM-1	906870	CDH23,DNAH8,MUC4
LAML	HEL	907053	MLL2,MUC4,SPAG17,TP53
LAML	KASUMI-1	907275	DNAH8,TP53,ZNF423
LAML	KG-1	907278	ABI3BP,MUC16,MUC4,TP53
LAML	KMOE-2	907280	BRWD3,MACF1,MUC16,OBSCN,SLC4A3,TP53
LAML	KY821	907300	CDH23,CEP350,DNAH17,DNAH8,GLT25D2,OBSCN,TP53
LAML	ML-2	908141	CEP350,DNAH17,DOCK1,MLL2
LAML	MONO-MAC-6	908148	MACF1,TP53
LAML	NKM-1	908448	MUC16,OBSCN
LAML	NOMO-1	908451	MUC4,OBSCN,TP53
LAML	P31-FUJ	909253	CDH23,EZH2,GLT25D2,MACF1,SLC4A3,SPAG17,TP53
LAML	SIG-M5	909715	GLT25D2,LMF1,MLL2,MUC16
LAML	THP-1	909771	MUC4,TP53
LAML	QIMR-WIL	910545	MUC4
LAML	CMK	910566	MUC16,MUC4,TP53
LAML	CESS	910688	MYCBPAP,OBSCN
LAML	OCI-AML2	910947	DNAH8,MACF1
LCML	JURL-MK1	1327771	CHD7,MLL2,MUC16
LCML	KCL-22	1330931	CHD7,COL10A1,COL25A1,FGFR3,FGFR4,KLB,LAMB2,MLL2,MTOR,MUC12,MUC16,MUC2,ST6GALNAC2,TIAM2,TIMP3,VCAN
LCML	K-562	905940	HMCN1,MUC16,SPAG16
LCML	EM-2	906855	COL10A1,MTOR
LCML	KU812	907311	TIAM2,VCAN
LCML	LAMA-84	907783	LAMB2,TIAM2
LCML	MEG-01	908126	MUC16
LCML	RPMI-8866	910544	MLL2,TIAM2
LCML	BV-173	910710	MLL2,MUC16
LCML	CML-T1	910951	CHD7,COL10A1,COL25A1,FMN2,HMCN1,KLB,LAMB2,LRRC4,MLL2,MTOR,MUC12,MUC16,MUC2,SNX30,ST6GALNAC2,TIAM2,TIMP3,VCAN
LGG	Hs683	1240150	CDKN2A,ERC2,TP53
LGG	SF539	905984	HMCN1,RB1,TP53
LGG	GAMG	906868	CDKN2A,TP53
LGG	GI-1	906871	ERC2,MUC5B,RB1,RETSAT,TP53
LGG	H4	907042	CDKN2A,HMCN1,KCNN2
LGG	KALS-1	907271	HMCN1,NF1,TP53
LGG	KINGS-1	907279	CDKN2A,NF1,TP53
LGG	KNS-42	907282	MUC5B,RETSAT,TP53
LGG	MOG-G-CCM	908144	CDKN2A,RB1,TP53
LGG	MOG-G-UVW	908145	DZIP1,HMCN1,TP53
LGG	NMC-G1	908449	CDKN2A,LRRC4C,MUC5B,RETSAT
LGG	no-11	908450	HMCN1,MUC5B,RB1,RETSAT,TP53
LGG	no-10	908452	MUC5B,RB1,RETSAT,TP53
LGG	SW1783	909750	KCNN2,NF1,RB1,TP53
LGG	KNS-81-FD	924188	CDKN2A,ERC2,HMCN1,MUC5B,RETSAT
LGG	D-336MG	946369	BHLHA15,CDKN2A,RB1,TP53
LGG	D-502MG	946373	CDKN2A,NF1
LIHC	Hep 3B2_1-7	1240147	COLEC11
LIHC	JHH-2	1240157	MUC16,TP53
LIHC	JHH-4	1240158	MAP1A,MUC16,RFWD3,TP53
LIHC	JHH-6	1240159	MUC4,TP53
LIHC	JHH-7	1240160	HPR,MAP1A,MUC16,MUC4,TP53
LIHC	SNU-182	1240216	CDHR1,MUC16,TP53
LIHC	SNU-398	1240217	RFWD3
LIHC	huH-1	1298146	ABCC11,MUC16,TP53
LIHC	JHH-1	1298151	ABCC11,MUC16
LIHC	HLE	907057	MUC16,MUC4,TP53
LIHC	HuH-7	907071	FCN1,MUC4,TP53
LIHC	SK-HEP-1	909719	MUC16,MUC4
LIHC	SNU-387	909736	MUC16,MUC4,TP53,UNC80
LIHC	SNU-423	909737	MAP1A,PACSIN3,RFWD3,TP53
LIHC	SNU-449	909738	MUC16,MUC4,TP53
LIHC	SNU-475	909739	MUC16,TP53
LIHC	C3A	910850	MAP1A,MUC4
LUAD	HCC-44	1240145	APOB,KEAP1,KRAS,TP53,USH2A
LUAD	HCC-827	1240146	EGFR,RYR2,TBX20,TP53,USH2A
LUAD	NCI-H1944	1240185	APOB,CDKN2A,CNTNAP4,KEAP1,KRAS,SMARCA4
LUAD	NCI-H2023	1240187	CDKN2A,COL19A1,DLGAP2,KEAP1,SMARCA4,TP53,TRPS1,USH2A
LUAD	NCI-H3122	1240190	CDKN2A,DMBT1,NF1,TP53,USH2A
LUAD	PC-3 [JPC-3]	1240202	APOB,CDKN2A,EGFR,RYR2,TP53
LUAD	H3255	1247873	CDKN2A,EGFR,MET,TP53
LUAD	201T	1287381	CDKN2A,DHX58,KRAS,MET,STK11,TP53,USH2A
LUAD	HCC-78	1290908	APOB,COL19A1,TP53
LUAD	NCI-H1435	1298347	CDKN2A,DLGAP2,NF1,POU3F1,SMARCA4,TP53,USH2A
LUAD	NCI-H1568	1298348	EGFR,GABBR1,RYR2,SMARCA4,TP53,USH2A
LUAD	NCI-H1781	1298350	RYR2,TP53
LUAD	RERF-LC-KJ	1298537	APOB,TP53,USH2A
LUAD	EMC-BAC-1	1503369	CDKN2A,CNTNAP4,COL19A1,RYR2,SMARCA4,STK11,TP53,USH2A
LUAD	EMC-BAC-2	1503370	CDKN2A,DLGAP2,KRAS,SMARCA4,STAB1,STK11,VSIG4
LUAD	NCI-H1395	684681	BRAF,STAB1,STK11
LUAD	Calu-3	687777	CDKN2A,TP53
LUAD	NCI-H1623	687798	CDKN2A,CNTNAP4,RYR2,SLC3A1,STK11,TP53,USH2A
LUAD	NCI-H1648	687799	APOB,CDKN2A,DMBT1,MET,RYR2,TP53,USH2A
LUAD	NCI-H1650	687800	CDKN2A,EGFR,RYR2,SMARCA4,TP53,USH2A
LUAD	NCI-H1693	687802	SMARCA4,TP53
LUAD	NCI-H1838	687807	APOB,CDKN2A,EGFR,MET,NF1,RYR2,TP53,TRPS1,USH2A
LUAD	NCI-H2085	687812	APOB,CNTNAP4,SMARCA4,STAB1,TP53
LUAD	NCI-H2228	687816	CDKN2A,EGFR,TP53
LUAD	NCI-H2342	687819	APOB,CDKN2A,CNTNAP4,COL19A1,EGFR,GABBR1,LRP2BP,MET,NF1,RYR2,SMARCA4,TP53,USH2A
LUAD	NCI-H2347	687820	CEACAM6,COL19A1,KRAS,NF1,RYR2,STAB1,USH2A
LUAD	NCI-H2405	687821	BRAF,CDKN2A,TP53
LUAD	VMRC-LCD	713869	APOB,CDKN2A,DLGAP2,DMBT1,TP53,USH2A
LUAD	NCI-H2030	722045	CDKN2A,KEAP1,KRAS,STK11,TP53,USH2A
LUAD	NCI-H2122	722046	CDKN2A,KRAS,STK11,TP53
LUAD	NCI-H1734	722058	APOB,KRAS,NF1,STK11,TP53,USH2A
LUAD	NCI-H650	722066	A1CF,APOB,CNTNAP4,DMBT1,EGFR,KRAS,PLXNC1,SMARCA4,STAB1,TP53,USH2A,VSIG4
LUAD	NCI-H2087	724834	BRAF,CDKN2A,CNTNAP4,RYR2,SMARCA4,TP53,USH2A
LUAD	Calu-6	724859	KRAS,RYR2,TP53
LUAD	NCI-H1355	724866	EGFR,KEAP1,KRAS,RYR2,SLC3A1,TP53,USH2A
LUAD	NCI-H1792	724868	APOB,CDKN2A,COL19A1,KEAP1,KRAS,PLXNC1,RYR2,TP53
LUAD	NCI-H2009	724873	APOB,KRAS,MET,PLXNC1,RYR2,TP53,TRPS1
LUAD	NCI-H2291	724874	APOB,EGFR,KRAS,TP53,USH2A
LUAD	SW1573	724878	CDKN2A,KRAS,PLXNC1
LUAD	LXF-289	753592	A1CF,CDKN2A,DMBT1,RYR2,TP53
LUAD	NCI-H1563	753600	APOB,CDKN2A,CNTNAP4,COL19A1,EGFR,STK11,USH2A
LUAD	PC-14	753608	CDKN2A,EGFR,TP53,USH2A
LUAD	NCI-H23	905942	APOB,CDKN2A,CNTNAP4,DLGAP2,KEAP1,KRAS,RYR2,SMARCA4,STK11,TBX20,TP53,TRPS1,USH2A
LUAD	NCI-H522	905944	SMARCA4,TP53
LUAD	A549	905949	APOB,CDKN2A,DHX58,KRAS,SMARCA4,STK11
LUAD	NCI-H322M	905967	CDKN2A,CNTNAP4,DHX58,KEAP1,NF1,RYR2,TP53
LUAD	EKVX	905970	DMBT1,SLC3A1,SMARCA4,STK11,TP53,USH2A
LUAD	HOP-62	905972	KRAS,RYR2,TP53,TRPS1,USH2A
LUAD	ABC-1	906791	APOB,CDKN2A,NF1,TP53
LUAD	COR-L105	906805	CDKN2A
LUAD	LC-2-ad	907786	CDKN2A,TP53,USH2A,VSIG4
LUAD	NCI-H441	908460	APOB,CDKN2A,COL19A1,DMBT1,KRAS,RYR2,TP53
LUAD	NCI-H1793	908463	A1CF,APOB,CDKN2A,EGFR,RYR2,SMARCA4,TP53,USH2A
LUAD	NCI-H358	908465	A1CF,APOB,COL19A1,DMBT1,KRAS,POU3F1,RYR2,STAB1,USH2A
LUAD	NCI-H1573	908472	A1CF,APOB,CDKN2A,CEACAM6,COL19A1,EGFR,KEAP1,KRAS,MET,POU3F1,RYR2,SLC3A1,SMARCA4,STK11,TP53,TRPS1,USH2A
LUAD	NCI-H1666	908473	BRAF,CDKN2A,STK11
LUAD	NCI-H1755	908475	BRAF,CDKN2A,DLGAP2,STK11,TP53,USH2A
LUAD	NCI-H1993	908476	MET,RYR2,STK11,TP53
LUAD	SK-LU-1	909721	CDKN2A,KRAS,PLXNC1,RYR2,TP53
LUAD	NCI-H838	910399	APOB,CDKN2A,CNTNAP4,DHX58,KEAP1,KRAS,MET,SMARCA4,TP53,TRPS1
LUAD	NCI-H1651	910900	BRAF,CDKN2A,COL19A1,NF1,RYR2,TP53,USH2A
LUAD	RERF-LC-MS	910931	KEAP1,STAB1,TP53,USH2A
LUAD	NCI-H1975	924244	CDKN2A,EGFR,TP53
LUSC	HARA	1240142	MUC16,PRDM9,TP53,USH2A
LUSC	HCC-15	1240143	CDKN2A,DNAH8,LPCAT2,MLL2,MUC16,PRDM9,RANBP2,TP53,USH2A
LUSC	NCI-H1869	1240183	CDKN2A,MUC16,TP53
LUSC	LC-1-sq	1298223	CDKN2A,DNAH8,MLL2,PRDM9,TP53
LUSC	LOU-NH91	1298226	CDKN2A,TP53
LUSC	RERF-LC-Sq1	1298538	CDKN2A,TP53
LUSC	LK-2	687787	CDKN2A,HOXA1,IRX1,MLL2,MUC16,PRDM9,RANBP2,TP53,USH2A
LUSC	NCI-H2170	687815	CDKN2A,DNAH8,MUC16,TP53,USH2A
LUSC	SW900	724879	CDKN2A,MLL2,MUC16,TP53
LUSC	EBC-1	753554	ABCC11,CDKN2A,DNAH8,MUC16,TP53,VEZT
LUSC	EPLC-272H	753556	DNAH8,MLL2,PRDM9,PVALB,RANBP2,SEPP1,TP53
LUSC	KNS-62	753569	ABCC11,CDKN2A,MUC16,TP53,USH2A
LUSC	NCI-H226	905941	ABCC11,CDKN2A
LUSC	NCI-H520	908443	RANBP2,TP53,USH2A
LUSC	SK-MES-1	909728	CDKN2A,LRRC4C,PRDM9,TP53
MESO	H2591	1240131	CDKN2A,OBSCN
MESO	H2595	1240132	BAP1,CDKN2A,LAMA3,TP53
MESO	H2731	1240134	BAP1,CDKN2A,LAMA3,NF2
MESO	H2803	1240135	CDKN2A,DLGAP2,OBSCN
MESO	H2804	1240136	BAP1,TP53
MESO	H2810	1240137	CDKN2A,HMCN1,TP53
MESO	H2869	1240138	BAP1,CDKN2A,LAMA3,OBSCN
MESO	H290	1240139	CDKN2A
MESO	H513	1240141	CDKN2A,HMCN1,KCTD19,LAMA3,MLL2,RXRB,TP53,TRIM44
MESO	H2369	1290808	CDKN2A,OBSCN
MESO	H2373	1290809	CDKN2A,KCTD19,OBSCN
MESO	H2461	1290810	BAP1,CDKN2A,LAMA3
MESO	H2722	1290812	BAP1,CDKN2A,NF2,OPA1
MESO	H2795	1290813	BAP1,CDKN2A
MESO	H2818	1290814	CDKN2A,MLL2,TP53
MESO	NCI-H2052	688058	CDKN2A,NF2
MESO	IST-MES1	907173	BAP1,CDKN2A
MESO	MPP-89	908150	LAMA3,NF2
MESO	MSTO-211H	908152	CDKN2A,MLL2
MESO	NCI-H2452	908462	BAP1,CDKN2A
MESO	NCI-H28	908470	BAP1,CDKN2A
MM	AMO-1	1295741	BCL9L,FAN1,MUC16,MUC4,MYO10,PDZD2
MM	EJM	1297447	MUC16,MYO10,PDZD2,TP53
MM	JJN-3	1327766	SLC4A3,THADA
MM	KARPAS-620	1327775	TP53
MM	MOLP-8	1330950	BCL9L,HELZ,MUC4,MYO10,USH2A
MM	KMS-11	1659817	MUC16,PDZD2,SLC4A4,THADA,USH2A
MM	MM1S	1659818	MUC4,MYO10,PDZD2,THADA
MM	MC-CAR	683665	MUC4
MM	NCI-H929	724825	FAN1
MM	IM-9	753563	MUC16
MM	SK-MM-2	753612	BCL9L,THADA,TP53
MM	U-266	753615	MUC16,MUC4,TP53,USH2A
MM	RPMI-8226	905964	HELZ,MUC4,THADA,TP53,USH2A
MM	ARH-77	906765	BCL9L,SLC4A3,TP53
MM	KMS-12-BM	907281	TP53,USH2A
MM	LP-1	907791	FAN1,TP53
MM	OPM-2	909249	MUC16,MUC4,SLC4A3,SLC4A4,TP53
MM	L-363	924239	MUC16,TP53,USH2A
NB	NB(TU)1-10	1240181	MUC17,MUC4,RANBP2,TP53
NB	SK-N-DZ	688086	BIRC6,HMCN1,NEB,TP53
NB	SK-N-FI	688087	HMCN1,MUC17,TP53
NB	SK-N-SH	717431	MUC17
NB	SK-N-AS	724828	HMCN1,MYO5B
NB	BE2-M17	753616	AHRR,BIRC6,CPSF1,FLG,NEB,TP53
NB	KELLY	753618	BIRC6,NEB,TP53
NB	SIMA	753620	CPSF1,FLG
NB	CHP-212	906820	FLG,NEB
NB	GI-ME-N	906872	ALMS1,FILIP1,FLG,NEB
NB	GOTO	906875	AHRR,DNAH11,MUC17,MUC4,MYO9A
NB	IMR-5	907170	BIRC6,FILIP1,FLG
NB	KP-N-YN	907314	ALMS1,BIRC6,NEB,SYNE2
NB	MHH-NB-11	908135	HMCN1,MYO9A,SYNE2
NB	NB69	908440	BIRC6,MYO9A
NB	NH-12	908447	DNAH11,FLG,HMCN1,NEB
NB	CHP-126	910567	ALMS1,FLG
NB	TGW	910780	CPSF1,DNAH11,FLG,MUC17,PI4KA,RANBP2,SYNE2,TP53
NB	CHP-134	910941	CHRNA7,DNAH11
NB	LAN-6	949170	FLG,MUC17,RANBP2,TP53
NB	NB10	949171	ALMS1,BIRC6,RANBP2
NB	NB12	949172	FLG,PI4KA
NB	NB6	949173	FLG,MYO9A,TP53
NB	NB7	949174	ABCC5,ALMS1,TP53
NB	NB17	949175	FLG,MUC17,MUC4,MYO5B,PI4KA
NB	NB5	949176	MUC4,TP53
NB	NB13	949177	ALMS1,DNAH11,FLG,MUC4,MYO9A,NEB,PI4KA,TP53
NB	NB14	949178	BIRC6,CHRNA7,CPSF1,DNAH11,MYO5B,TP53
NB	NB1	949179	ALMS1,DNAH11,FLG,MUC4
OV	FU-OV-1	1240129	CREBBP,LILRB2,MYC,NF1
OV	OV-90	1240197	MAP3K4,OBSCN
OV	OVISE	1240198	ARID1A,GRM7,MDM2
OV	OVKATE	1240199	FASN,LRRC4,MAP3K4,NF1,SALL2
OV	OVMIU	1240200	ARID1A,FLG,MYC,RB1,SALL2
OV	TOV-21G	1240222	ARID1A,FLG,KRAS,LRPPRC,MLL2,MLL3,MYH11,NF1,OBSCN,PCLO,SVIL,SYNE1,XYLT2
OV	OVTOKO	1298365	ARID1A,LRPPRC,OBSCN,PHRF1
OV	TOV-112D	1299070	FLG
OV	DOV13	1479987	MAP3K4,NF1
OV	Hey	1479988	KRAS,MYC,OBSCN,P2RX1
OV	JHOS-2	1479995	FASN,PCLO
OV	JHOS-3	1480358	CREBBP,MAP3K4,NF1,PCLO,RB1
OV	JHOS-4	1480359	FLG,MAP3K4,MYC
OV	OV-7	1480360	KRAS,RB1,SYNE1
OV	OV-17R	1480361	MLL3
OV	OV-56	1480362	ARID1A,FLG,KRAS,MYC
OV	OVCA420	1480364	FLG,OBSCN,SYNE1
OV	OVK-18	1480371	ARID1A,DYSF,FASN,FLG,GBF1,GRM7,KRAS,LRPPRC,MAP3K4,MLL2,MLL3,MYH11,OBSCN,PCLO,SVIL,SYNE1,XYLT2
OV	PEO1	1480372	CREBBP,FLG,MAP3K4,NF1,RB1
OV	UWB1.289	1480374	KRAS,MYC,NF1
OV	OVCAR-3	905933	CD200R1,KRAS,PCLO
OV	SK-OV-3	905959	ARID1A,FLG,KRAS,MYH11,NF1,PHRF1
OV	IGROV-1	905968	ARID1A,CREBBP,DYSF,FASN,FLG,GRM7,MLL2,RB1,SALL2,SVIL,SYNE1,XYLT2
OV	OVCAR-5	905969	CREBBP,KRAS,PCLO
OV	OVCAR-4	905990	KRAS,MLL3,MYC,SVIL,SYNE1
OV	OVCAR-8	905991	CREBBP,KRAS,PCLO
OV	OC-314	909257	ARID1A,CREBBP,DYSF,FASN,FLG,GBF1,GRM7,LILRB2,LRPPRC,MLL2,MLL3,MYH11,OBSCN,PCLO,SVIL,SYNE1,XYLT2
OV	SW626	909753	KRAS,SYNE1
OV	OAW-42	910548	ARID1A,MYC
OV	EFO-21	911905	MAP3K4,NF1,PHRF1,RB1,SYNE1
OV	OAW-28	946360	FLG,KRAS,RB1
OV	Caov-4	949090	KRAS,MDM2,MYC,OBSCN,PCLO
PAAD	PA-TU-8988T	1240201	KRAS,TP53
PAAD	PL18	1240208	PLA2G4C,TP53,YEATS2
PAAD	SU8686	1240218	KRAS,TP53
PAAD	SUIT-2	1240219	KRAS,TP53
PAAD	DAN-G	1290797	KRAS,MUC16,TP53
PAAD	HPAC	1298136	KRAS,TP53,TXNDC11
PAAD	Hs766T	1298141	KRAS
PAAD	KP-1N	1298216	KRAS,TP53
PAAD	KP-2	1298218	A1CF,KRAS,MUC16,TP53
PAAD	PANC-02-03	1298475	KRAS,MUC16,TP53,YEATS2
PAAD	PANC-04-03	1298476	KRAS,TP53
PAAD	PA-TU-8902	1298526	KRAS,MUC16,TP53
PAAD	PL4	1298533	KRAS,TP53
PAAD	HPAF-II	724869	KRAS,TP53
PAAD	MIA-PaCa-2	724870	KRAS,MUC16,TP53
PAAD	KP-4	753572	CHGB,CNTN5,KRAS,TXNDC11
PAAD	MZ1-PC	753595	KRAS,TP53
PAAD	CAPAN-1	753624	KRAS,TP53
PAAD	BxPC-3	906693	TP53
PAAD	CFPAC-1	906821	KRAS,TP53
PAAD	HuP-T3	907285	KRAS,TP53
PAAD	HuP-T4	907286	KRAS,MUC16,PLA2G4C,TP53
PAAD	YAPC	909904	KRAS,TP53
PAAD	PSN1	910546	KRAS,MUC16,TP53
PAAD	AsPC-1	910702	KRAS,TP53
PAAD	SW1990	910907	KRAS,MUC16,TP53
PAAD	Capan-2	910915	KRAS,MUC16
PAAD	PANC-03-27	925346	CNTN5,KRAS,TP53
PAAD	PANC-08-13	925347	KRAS,MUC16
PAAD	PANC-10-05	925348	KRAS,TP53
PRAD	VCaP	1299075	PLEC
PRAD	PWR-1E	1330993	PLEC
PRAD	PC-3	905934	BMPR1A,PTEN
PRAD	DU-145	905935	BRCA2,CARD6,CHD9,CREBBP,FGF5,HLX,LBR,MED12L,MLL3,NOTCH2,NRG1,PLEC,PPP6R2,PTPN14,SRCAP,TCERG1,TET2,TP53BP1,TTC24,VANGL2
PRAD	LNCaP-Clone-FGC	907788	AR,BMPR1A,BRCA2,CARD6,CHD9,CREBBP,FGF5,HAS2,HOXB13,LBR,MED12L,MLL3,NOTCH2,NRG1,PLEC,PPP6R2,PTEN,PTPN14,SRCAP,TCERG1,TET2,TP53BP1,TTC24,VANGL2
PRAD	22RV1	924100	AR,BRCA2,CARD6,CHD9,CREBBP,FGF5,LBR,MED12L,MLL3,NOTCH2,NRG1,PLEC,PPP6R2,PTPN14,RBAK,SRCAP,TCERG1,TET2,TP53BP1,TTC24,VANGL2
SCLC	NCI-H1836	1240182	LRRK2,MUC16,TP53,UNC80
SCLC	NCI-H196	1240186	COL11A1,KCNK10,LRRK2,MUC16,MUC4,MUC5B,RB1,TP53,UNC80
SCLC	NCI-H211	1240189	COL11A1,MUC16,MUC5B,TP53,UNC80
SCLC	NCI-H841	1240192	CDH18,GPR98,IGSF9B,MLL3,MUC16,TP53
SCLC	NCI-H847	1240193	COL11A1,GABBR1,GPR98,MUC4,RB1,TP53
SCLC	COR-L303	1297438	LRRK2,RB1,TP53
SCLC	COR-L95	1297439	GABBR1,GPR98,MLL3,MUC16,RB1,TP53
SCLC	NCI-H1688	1298349	MLL3,MUC5B,TP53,UNC80
SCLC	SW1271	1299062	LRRC4C,MSRA,MUC16,MUC4,MUC5B,TP53
SCLC	COR-L32	1322212	LRRK2,MSRA,MUC16,RB1
SCLC	NCI-H1341	1330964	COL11A1,MUC4
SCLC	NCI-H1876	1330972	COL11A1,KIRREL2,MUC16,MUC4,MUC5B,RB1,TP53
SCLC	NCI-H2066	1330973	CA4,COL11A1,LRRK2,MLL3,MUC4,TP53
SCLC	NCI-H740	1331055	CDH18,COL11A1,GPR98,MUC16,MYPN,PTPRN,RB1,RFX6,TP53,UNC80
SCLC	COR-L311	687980	MUC4,MYPN,RB1,TP53
SCLC	DMS-114	687983	FEM1B,MUC4,MYPN,TP53
SCLC	DMS-273	687985	MARCO,MUC16,MUC5B,RB1,TP53,UNC80
SCLC	NCI-H1048	687995	COL11A1,GOLGB1,LRRK2,MLL3,MUC4,RB1,TP53
SCLC	NCI-H1092	687997	LRRK2,MUC16,PTPRN,TP53
SCLC	NCI-H1417	688001	CDH18,COL11A1,ENAM,GABBR1,GPR98,MUC16,MUC4,RB1,TP53
SCLC	NCI-H1694	688006	CDH18,MUC16,RB1,TP53
SCLC	NCI-H187	688007	CDH18,COL11A1,GOLGB1,KCNK10,LRRK2,MLL3,MUC4,MUC5B,TP53
SCLC	NCI-H1963	688010	GABBR1,LRRK2,MUC4,MYPN,RB1,TP53,UNC80
SCLC	NCI-H2029	688011	MUC4,MUC5B,RB1,TP53
SCLC	NCI-H209	688013	LRRK2,RB1,TP53
SCLC	NCI-H2141	688014	GPR98,MLL3,MUC16,MUC4,RB1,TP53
SCLC	NCI-H2227	688018	GABBR1,MSRA,MUC5B,RB1,TP53
SCLC	NCI-H345	688021	COL11A1,KIRREL2,MUC16,MUC4,MUC5B,TP53,UNC80
SCLC	NCI-H378	688022	CHST10,MUC16,TP53
SCLC	NCI-H446	688023	CA4,MUC4,RB1,TP53,UNC80
SCLC	NCI-H526	688025	MUC16,TP53
SCLC	NCI-H64	688026	IGSF9B,MARCO,MLL3,MUC16,MUC4,RB1,TP53,UNC80
SCLC	NCI-H69	688027	MUC16,MUC4,RB1,TP53
SCLC	NCI-H82	688031	GOLGB1,MUC4,RB1
SCLC	LU-139	713878	GPR98,MLL3,MUC16,MUC4,RB1,TP53
SCLC	SBC-5	713880	MUC16,MUC5B,TP53
SCLC	SBC-1	713885	GPR98,HSPB7,MUC16,RB1,TP53
SCLC	LU-135	713899	LRRC4C,MUC16,MUC4,MYPN,RB1,TP53
SCLC	SHP-77	724872	GOLGB1,GPR98,MUC16,TP53
SCLC	CPC-N	753547	GPR98,MUC4,MYPN,RB1,TP53
SCLC	DMS-79	753551	COL11A1,ENAM,MUC16,RB1,UNC80
SCLC	IST-SL1	753564	MUC16,MUC4,RB1
SCLC	IST-SL2	753565	GPR98,MUC16,MUC4,RB1,TP53
SCLC	LB647-SCLC	753582	PTPRN,TP53,UNC80
SCLC	LU-134-A	753588	CDH18,GOLGB1,LRRK2,MUC16,RB1,TP53
SCLC	LU-165	753589	COL11A1,MUC5B,PTPRN,RB1,TP53
SCLC	MS-1	753594	HSPB7,RB1,TP53
SCLC	NCI-H1304	753599	AGR3,MUC16,MUC5B,RB1,TP53
SCLC	NCI-H510A	753605	CDH18,COL11A1,GPR98,KCNK10,MUC16,MUC4,MUC5B,MYPN,RB1,TP53
SCLC	SBC-3	753610	CDH18,GPR98,MUC4
SCLC	COR-L88	906808	KCNK10,LRRK2,RB1,TP53,UNC80
SCLC	DMS-53	907295	MUC16,MUC5B,TP53
SCLC	NCI-H1105	908468	GPR98,KCNK10,LRRK2,MUC5B,TP53,UNC80
SCLC	NCI-H1436	908469	CDH18,COL11A1,GPR98,MUC16,MUC5B,RB1,TP53
SCLC	NCI-H2196	908481	MUC16,MUC4,TP53
SCLC	NCI-H524	908483	LRRK2,MUC16,MUC4,RB1,TP53
SCLC	NCI-H748	909194	COL11A1,MUC16,MUC4,RB1,RFX6,TP53,UNC80
SCLC	COLO-668	910692	ENAM,LRRK2,MLL3,MUC4,RB1,TP53,UNC80
SCLC	NCI-H146	910899	KCNK10,MUC16,MUC4,RB1,TP53
SCLC	COR-L279	910937	MUC16,RB1,TP53
SCLC	NCI-H250	924241	GOLGB1,GPR98,IGSF9B,MUC16,MUC4,RB1,TP53
SKCM	COLO-783	1240125	COL12A1,DNAH11,GDPD5,MUC16,MUC4,MYH1,NEB,PCLO,USH2A
SKCM	G-MEL	1240130	DNAH5,EBF1,LRP2,MUC16,NEB,PCLO,RYR2,SYBU,TNR,VCAN
SKCM	IGR-37	1240153	DNAH11,DNAH5,MUC12,MUC16,PCLO,TNR
SKCM	WM278	1240226	ANK3,DNAH11,MUC16,NCAM2,PRG2
SKCM	451Lu	1287706	DNAH11,DNAH17,DNAH5,IL1R2,LRP2,MUC16,MYH1,PLCB1,RYR2,UNC80
SKCM	Hs940-T	1298145	DNAH17,MUC16,MUC4
SKCM	K2	1298160	CNTNAP2,COL12A1,DNAH6,HSPG2,MUC4,MYH1,NCAM2,NEB,PCDH15,PLCB1,TSHZ2,UNC80
SKCM	WM1552C	1299078	CHRND,MUC16,MUC4,NEB,VCAN
SKCM	WM35	1299080	ANK3,DNAH5,MUC12,MYH1,PTPRB,UNC80
SKCM	WM793B	1299081	DNAH17,MUC16,MUC4,NCAM2,PCLO,USH2A
SKCM	COLO-829	687448	IL1R2,MUC16,MUC4,MYO15A,VCAN
SKCM	CP50-MEL-B	753545	ANK3,LRP2,MUC16
SKCM	CP66-MEL	753546	DNAH11,DNAH17,DNAH6,LILRB2,LRP2,MUC16,NCAM2,PCLO,PTPRB,UNC80,VCAN
SKCM	LB2518-MEL	753579	COL12A1,DNAH17,MUC16,MUC4,PCLO,PLCB1
SKCM	LB373-MEL-D	753581	PCLO
SKCM	MZ7-mel	753596	ANK3,CNTNAP2,COL12A1,DAGLA,DNAH11,DNAH17,DNAH5,DNAH6,HSPG2,MUC12,MUC16,MUC4,MYO15A,NEB,NELL2,PCDH15,PCLO,PTPRB,RYR2,TNR,USH2A,VCAN,WWP2
SKCM	SK-MEL-28	905954	MUC16,MUC4,NCAM2,NEB,RYR2,WWP2
SKCM	SK-MEL-2	905955	ANK3,CD96,DNAH11,DNAH6,LILRB2,MUC12,MUC16,MUC4,MYH1,USH2A
SKCM	SK-MEL-5	905956	ANK3,DNAH17,DNAH5,DNAH6,MUC12,NUAK2,PACSIN3,PCDH15,PCLO,PLCB1,TSHZ2,USH2A
SKCM	LOXIMVI	905974	ANK3,DNAH5,GKAP1,MUC16,MYH1,PRG2,SYBU
SKCM	M14	905975	ANK3,CNTNAP2,COL12A1,DAGLA,DNAH11,DNAH17,DNAH5,DNAH6,EBF1,HSPG2,IL1R2,LRP2,MUC12,MUC16,MUC4,MYH1,MYO15A,NCAM2,NEB,NELL2,NUAK2,PCDH15,PLCB1,PTPRB,RYR2,TNR,TSHZ2,USH2A,VCAN,WWP2
SKCM	UACC-62	905976	CNTNAP2,HSPG2,MUC16,MYH1,MYO15A,PCLO,RYR2
SKCM	UACC-257	905977	CD96,MUC16,NEB,PCDH15,USH2A,VCAN
SKCM	A2058	906792	DNAH11,DNAH5,MUC4,PCLO,PLCB1,PRG2,PTPRB
SKCM	A375	906793	ANK3,MUC16,USH2A
SKCM	COLO-800	906813	CNTNAP2,COL12A1,DNAH11,MUC4,PCLO,RYR2,USH2A
SKCM	COLO-792	906814	ANK3,CNTNAP2,DAGLB,DNAH11,DNAH17,DNAH5,DNAH6,EBF1,HSPG2,LRP2,MUC12,MUC16,MUC4,NEB,PCDH15,PCLO,PLCB1,PTPRB,RYR2,USH2A,VCAN
SKCM	COLO-679	906818	CD96,DNAH17,DNAH5,EBF1,LILRB2,LRP2,MUC12,MUC16,PCDH15,PCLO,TNR,TSHZ2,USH2A
SKCM	C32	906830	CNTNAP2,MUC16,MUC4,PLCB1
SKCM	G-361	906865	CNTNAP2,DNAH5,MUC12,MUC16,MUC4,PCDH15,USH2A
SKCM	HMV-II	907058	DNAH6,MUC16,MYH1,PCLO,VCAN
SKCM	HT-144	907067	MUC12,PTPRB,RYR2,USH2A
SKCM	IGR-1	907169	ANK3,CNTNAP2,DNAH17,DNAH5,DNAH6,MUC16,MUC4,NEB,PCLO,PTPRB,RYR2,USH2A
SKCM	IPC-298	907171	ANK3,CNTNAP2,DNAH17,DNAH5,LRP2,MUC12,MUC16,MUC4,NCAM2,PCDH15,PCLO,PRG2,VCAN
SKCM	IST-MEL1	907172	HSPG2,LRP2,MUC12,MUC16,MUC4,PACSIN3,PLCB1,UNC80,USH2A
SKCM	MEL-HO	908124	DNAH11,MUC16,MUC4,TNR
SKCM	MEL-JUSO	908125	CD96,CNTNAP2,DAGLA,DAGLB,DNAH11,DNAH5,LRP2,MUC16,MYH1,MYO15A,NEB,PCLO,UNC80,VCAN
SKCM	Mewo	908128	ANK3,CD96,CNTNAP2,COL12A1,DAGLA,DAGLB,DNAH11,DNAH17,DNAH5,DNAH6,EBF1,HSPG2,IL1R2,LRP2,MUC12,MUC16,MUC4,MYH1,MYO15A,NCAM2,NEB,NELL2,PCDH15,PCLO,PLCB1,PTPRB,RYR2,TNR,TSHZ2,UNC80,USH2A,VCAN,WWP2
SKCM	RVH-421	909706	DNAH17,DNAH5,DNAH6,MUC12,MUC16,MUC4,NEB
SKCM	SH-4	909713	DNAH11,LRP2,MUC16,NEB,PCLO
SKCM	SK-MEL-1	909723	MUC16,MYH1,USH2A,VCAN
SKCM	SK-MEL-3	909724	MUC12,NUAK2,UNC80
SKCM	SK-MEL-24	909725	ANK3,DNAH6,HSPG2,MUC12,MUC16,MUC4
SKCM	SK-MEL-30	909726	DNAH5,DNAH6,HSPG2,MUC16,MUC4,MYO15A,PTPRB
SKCM	SK-MEL-31	909727	LILRB2,MUC16,PCLO
SKCM	WM-115	909784	MUC16,PCDH15,PCLO
SKCM	CHL-1	910853	CD96,LRP2,MUC12,MUC16,RYR2,USH2A
SKCM	RPMI-7951	910903	DAGLB,LRP2,PCLO,RYR2
SKCM	A101D	910921	NELL2
SKCM	GAK	910932	COL12A1,MUC4,NEB,USH2A,VCAN
SKCM	MMAC-SF	925339	DNAH11,DNAH17,MUC12,MUC16,TNR
SKCM	MZ2-MEL	971777	DNAH5,MUC12,MYO15A,PLCB1
STAD	Hs746T	1240151	DIDO1,FAT1,LRP2,LRRC4C,MUC16,PARD3B
STAD	IM-95	1240155	ABCC11,ACACB,FAT1,LRP1,MUC16,MUC4,NEB,SYNE1
STAD	RERF-GC-1B	1240209	ABCC11,FAT1,MUC4
STAD	FU97	1290806	ACACB,MIP,MUC4,NEB
STAD	NUGC-4	1298357	CDHR1,FAT1,GRIN2A,MUC16,MUC4,NEB,SLC4A3
STAD	OCUM-1	1298358	ABCC11,FAT1,MUC16,MUC4
STAD	HSC-39	1322224	MUC4,NEB,SYNE1
STAD	SK-GT-2	1503364	GPR98,NEB
STAD	AGS	906790	GPR98,GRIN2A,LRP1,LRP2,MUC4,SYNE1,TG
STAD	GCIY	906869	NEB,OBSCN,TG
STAD	GT3TKB	907041	MAP1A,MUC4
STAD	HGC-27	907055	DGKD,DIDO1,EFCAB6,FAT1,LRP1,LRP2,MUC16,MUC4,OBSCN,SYNE1,WNK2
STAD	KATOIII	907276	ABCC11,MAP1A,MUC4,OBSCN,TDRD6
STAD	MKN28	908139	LRP1,MUC4,OBSCN
STAD	NCI-SNU-1	908444	ACACB,FAT1,GPR98,GRIN2A,LRP1,LRP2,LRRC4C,MAP1A,MUC16,MUC4,NEB,PARD3B,SLC4A3,SYNE1,TG,WNK2
STAD	NCI-SNU-5	908445	MUC16,NEB
STAD	NCI-SNU-16	908446	MUC16,MUC4,NEB,TDRD6
STAD	NUGC-3	908455	ACACB,DIDO1,EFCAB6,FAT1,GPR98,LRP2,MUC16,MUC4,OBSCN,SLC4A4,SYNE1,TG
STAD	NCI-N87	908461	LPIN1,MUC16,SYNE1,TG
STAD	RF-48	909697	FAT1,MUC16,NEB
STAD	TGBC11TKB	909770	ACACB,DGKD,EFCAB6,FAT1,GPR98,GRIN2A,LIPC,LPIN1,LRP1,LRP2,MAP1A,MUC16,MUC4,NEB,OBSCN,SYNE1,TG,WNK2
STAD	23132-87	910924	ACACB,DIDO1,EFCAB6,FAT1,GPR98,GRIN2A,LPIN1,LRP2,MUC16,NEB,OBSCN,SYNE1,TDRD6,TG,WNK2
STAD	MKN7	924250	FAT1,GPR98,LRP1
STAD	MKN45	925340	FAT1,MUC4
THCA	IHH-4	1240154	BRAF,DUOX2,MUC16
THCA	ML-1	1240178	TP53
THCA	TT2609-C02	1240223	MUC16,PDZD2,TP53
THCA	ASH-3	1290722	LRRC52,MUC16,SLX4,TP53
THCA	BHT-101	906696	BRAF,TP53
THCA	8305C	906795	BRAF,DUOX2,TP53
THCA	CAL-62	906828	MUC16,TP53
THCA	FTC-133	906864	DUOX2,LAMA5,PDZD2,SLX4,TP53
THCA	CGTH-W-1	910568	MUC16,TP53
THCA	8505C	924102	BRAF,LAMA5,MUC16,PRB2,TP53
THCA	BCPAP	924104	BRAF,TP53
THCA	HTC-C3	924151	BRAF,TP53
THCA	K5	924238	BRAF,LAMA5,MUC16,SLX4
THCA	RO82-W-1	930083	MUC16,TP53
THCA	TT	930299	MUC16
UCEC	EN	1240127	ABCA2,ABCB6,ATP1A3,ATP1A4,ATP1B1,ATP1B2,BSN,BZRAP1,CHGB,COL7A1,DNAH14,DNAH17,DNAH6,EP300,FAT1,GPR98,HERC1,HMCN1,IQSEC1,LMTK2,LRP2,MACF1,MKL1,MLL2,NOS3,NRP2,PCDH15,PCLO,PLEC,PLXNA1,PLXNA3,PPFIA4,RECK,SIK3,TDRD1,USP9X,VPS13A
UCEC	MFE-319	1240174	ABCA2,ABCB6,BSN,COL7A1,DNAH17,DNAH6,DSC3,EP300,FAT1,GPR98,HERC1,HMCN1,IQSEC1,KIF26B,LMTK2,LRP2,MACF1,MKL1,MLL2,NOS3,NRP2,PCDH15,PCLO,PLEC,PLXNA1,PLXNA3,PPFIA4,RECK,SIK3,USH1G,USP9X,VPS13A
UCEC	HEC-1	907051	ABCA2,ATP1A3,ATP1A4,BSN,COL7A1,DNAH14,DNAH17,DNAH6,EP300,FAT1,GPR98,HERC1,HMCN1,IQSEC1,KIF26B,LRP2,MACF1,MKL1,MLL2,NOS3,PCDH15,PCLO,PLEC,PPFIA4,RECK,SIK3,TDRD1,USH1G,USP9X,VPS13A
UCEC	MFE-280	908129	KIF26B,PCLO
UCEC	MFE-296	908130	COL7A1,DNAH17,DNAH6,EP300,GPR98,LRP2,MLL2,PCLO,VPS13A
UCEC	SNG-M	909735	ABCB6,COL7A1,DNAH17,EP300,HMCN1,KIAA0319,LMTK2,LRP2,MACF1,MLL2,NOS3,PCLO,PLEC,VPS13A
UCEC	COLO-684	910691	ATP1A4,BSN,CHGB,COL7A1,DNAH17,DNAH6,EP300,FAT1,GPR98,HERC1,IQSEC1,LMTK2,LRP2,MACF1,MKL1,MLL2,NOS3,PCDH15,PLEC,PLXNA3,PPFIA4,RECK,SIK3,TDRD1,USP9X,VPS13A
UCEC	AN3-CA	910781	DNAH14,DSC3,GPR98,HMCN1,KIAA0319,KIF26B,LRP2,MACF1,PCDH15,PCLO,PLEC,PLXNA3,TDRD1
UCEC	KLE	924187	PPFIA4
