# Supplementary material for: HIT'nDRIVE: patient-specific multidriver gene prioritization for precision oncology
Source: HighWire-hosted journal article supplement (doi:10.1101/gr.221218.117), 2017-07-18
Supplement: Supplemental_Table_S19.xlsx [file Supplemental_Table_S19.xlsx]

## Sheet: Supplemental_Table_S19
Supplemental Table S19. Drive modules identified by HIT'nDRIVE-OptDis for drug-response phenotype classification on Iorio et al. 2016 dataset
Cancer.Type	Drug.Identifier	Drug.Name	Drug.Action	Drug.Putative.Target	Drug.Targeted.Pathway	Module.Number	Module.SeedGene	Module.Genes	Module.Classification.Accuracy
ALL	1001	AICAR	targeted	AAPK1 (AMPK) agonist	metabolism	SN-01	EGFR	CD44,DNTT,EGFR,MYC	0.59
ALL	1001	AICAR	targeted	AAPK1 (AMPK) agonist	metabolism	SN-02	CDC42BPA	CDC42BPA,DNTT,DUSP6,MAPK7,MEF2C,MYC,MYL2	0.82
ALL	1001	AICAR	targeted	AAPK1 (AMPK) agonist	metabolism	SN-03	SIN3B	DNTT,MAX,SIN3B,TK1	0.73
ALL	1001	AICAR	targeted	AAPK1 (AMPK) agonist	metabolism	SN-04	ARID1A	ARID1A,DNTT,NR3C1,NRIP1,PCNA,TOP2B	0.73
ALL	1001	AICAR	targeted	AAPK1 (AMPK) agonist	metabolism	SN-05	SIN3B	DUSP6,MAPK1,NRIP1,SIN3B,TERT	0.82
ALL	1001	AICAR	targeted	AAPK1 (AMPK) agonist	metabolism	SN-06	RAD54L	DNTT,DUSP6,H2AFX,MAPK8,RAD51,RAD54L,XRCC6	0.77
ALL	1001	AICAR	targeted	AAPK1 (AMPK) agonist	metabolism	SN-07	LRP1	CD44,DUSP6,LRP1,MAPK3,NRIP1,PLAUR,SRC	0.82
ALL	1001	AICAR	targeted	AAPK1 (AMPK) agonist	metabolism	SN-08	HERC1,TP53	CD44,DNTT,HERC1,SOCS2,STAT3,TP53,UBC	0.82
ALL	1001	AICAR	targeted	AAPK1 (AMPK) agonist	metabolism	SN-09	LTBR	DNTT,DUSP6,LTBR,MAPK11,TRAF2,TRAF3,UBC	0.77
ALL	1001	AICAR	targeted	AAPK1 (AMPK) agonist	metabolism	SN-10	CRTC1	CRTC1,DNTT,ETS2,JUN,MMP1,NRIP1,UBC	0.77
ALL	1001	AICAR	targeted	AAPK1 (AMPK) agonist	metabolism	SN-11	ZNF423	DNTT,EBF1,MYC,NRIP1,PPARGC1A,TGFB1,ZNF423	0.77
ALL	1001	AICAR	targeted	AAPK1 (AMPK) agonist	metabolism	SN-12	PCNT	DNTT,DUSP6,HSP90AA1,MAPK1,PCNT,PRKDC,YWHAE	0.82
ALL	1001	AICAR	targeted	AAPK1 (AMPK) agonist	metabolism	SN-13	ARID1A	ARID1A,CD44,IFITM3,IRF2	0.82
ALL	1001	AICAR	targeted	AAPK1 (AMPK) agonist	metabolism	SN-14	SRRM2	DUSP6,MAPK8,RBM17,SF3A2,SOCS2,SRRM2,STAT3	0.82
ALL	1001	AICAR	targeted	AAPK1 (AMPK) agonist	metabolism	SN-15	SRRM2	AR,DNTT,NRIP1,PRPF6,SF3A2,SRRM2,XRCC5	0.82
ALL	1001	AICAR	targeted	AAPK1 (AMPK) agonist	metabolism	SN-16	FBN2	DNTT,FBN2,MFAP1,MFAP2,MFAP4,PRPF19	0.86
ALL	1001	AICAR	targeted	AAPK1 (AMPK) agonist	metabolism	SN-17	NID2	CD34,CD44,DNTT,MMP9,NID1,NID2,VEGFA	0.82
ALL	1001	AICAR	targeted	AAPK1 (AMPK) agonist	metabolism	SN-18	CPSF1	CPSF1,DNTT,ESR1,NRIP1,PRKDC,RBBP6,WDR33	0.86
ALL	1001	AICAR	targeted	AAPK1 (AMPK) agonist	metabolism	SN-19	CDK12	CCNT1,CDK12,DNTT,MYC,POLR2A,SOCS2,TCEB2	0.91
ALL	1001	AICAR	targeted	AAPK1 (AMPK) agonist	metabolism	SN-20	RYR1	DNTT,HMGB1,HOMER3,IKBKB,RAG2,RYR1,UBC	0.91
ALL	1001	AICAR	targeted	AAPK1 (AMPK) agonist	metabolism	SN-21	DUOX2	CD44,DECR1,DUOX2,DUSP6,MAPK13,RAC1,VCAM1	0.82
ALL	1001	AICAR	targeted	AAPK1 (AMPK) agonist	metabolism	SN-22	CXADR	AMICA1,CD44,CXADR,DNTT,ITGB1,MAX,VCAM1	0.82
ALL	1001	AICAR	targeted	AAPK1 (AMPK) agonist	metabolism	SN-23	CELSR1	ADAR,CELSR1,IFITM3,VANGL2	0.86
ALL	1001	AICAR	targeted	AAPK1 (AMPK) agonist	metabolism	SN-24	LAG3	CD34,CD8A,DNTT,LAG3,PTPRC,SOCS2,STAT5B	0.91
ALL	1001	AICAR	targeted	AAPK1 (AMPK) agonist	metabolism	SN-25	CDC42BPA	CDC42,CDC42BPA,DUSP6,MAPK13,SOCS2,STAT5B,YES1	0.91
ALL	1001	AICAR	targeted	AAPK1 (AMPK) agonist	metabolism	SN-26	CELSR1	CELSR1,DNTT,DVL3,NKD2,UBC,VANGL1,VANGL2	0.91
ALL	1001	AICAR	targeted	AAPK1 (AMPK) agonist	metabolism	SN-27	MBD6	DCPS,DNTT,EXOSC8,MBD6,MYC,UBC,ZFP36L1	0.91
ALL	1001	AICAR	targeted	AAPK1 (AMPK) agonist	metabolism	SN-28	ALKBH7	ALKBH1,ALKBH7,ALKBH8,OAT,TRMT112,UBC	0.86
ALL	1001	AICAR	targeted	AAPK1 (AMPK) agonist	metabolism	SN-29	PFKFB2	AKT1,IL2RB,NRIP1,PFKFB2,SOCS2	0.91
ALL	1001	AICAR	targeted	AAPK1 (AMPK) agonist	metabolism	SN-30	HMCN1,TP53	DNTT,ETS2,HMCN1,SIRPG,TP53,VEGFA,XRCC5	0.91
ALL	1001	AICAR	targeted	AAPK1 (AMPK) agonist	metabolism	SN-31	TRPV3	DNTT,TRPA1,TRPM8,TRPV3,UBC,USP10,ZC3H18	0.91
ALL	1001	AICAR	targeted	AAPK1 (AMPK) agonist	metabolism	SN-32	KALRN	KALRN,LCK,SOCS2,VAV3	0.91
ALL	1001	AICAR	targeted	AAPK1 (AMPK) agonist	metabolism	SN-33	MYCBP2	DNTT,MYCBP2,NUP160,RAE1,RPL39L,RPS27,UBC	0.91
ALL	1001	AICAR	targeted	AAPK1 (AMPK) agonist	metabolism	SN-34	DNAH8	CD44,DNAH8,LCK,PRKCZ,SNX4,SOCS2,WWC1	0.91
ALL	1003	Camptothecin	cytotoxic	TOP1	DNA replication	SN-01	SMC4	FBXO43,OAT,PLK1,RPL39L,SMC4,UBA52,UBC	0.7
ALL	1003	Camptothecin	cytotoxic	TOP1	DNA replication	SN-02	CRTC1	CDKN2A,CRTC1,EGR1,FOS,TUBB6,UBC	0.91
ALL	1003	Camptothecin	cytotoxic	TOP1	DNA replication	SN-03	COL14A1	BAMBI,BMP2,CDKN2A,COL14A1,COL2A1,JUN,MMP9	0.91
ALL	1003	Camptothecin	cytotoxic	TOP1	DNA replication	SN-04	ERCC6,TP53	CCNT1,CDKN2A,ERCC6,HIST1H1C,TP53,UBC,XPC	0.91
ALL	1003	Camptothecin	cytotoxic	TOP1	DNA replication	SN-05	TRIO	CDKN2A,NPSR1,PIK3R1,RPL39L,TRIO,XCR1	0.91
ALL	1003	Camptothecin	cytotoxic	TOP1	DNA replication	SN-06	RYR3	BAMBI,FBXO43,FKBP1A,PLK1,RYR3,TGFBR3,YY1	0.91
ALL	1003	Camptothecin	cytotoxic	TOP1	DNA replication	SN-07	RYR1	CCNT1,HOMER3,IKBKB,RPL39L,RPS3,RYR1	0.91
ALL	1003	Camptothecin	cytotoxic	TOP1	DNA replication	SN-08	SHANK2	CTTN,DNM1,GNB2L1,RPL39L,SHANK2,TUBB6,UBC	0.91
ALL	1003	Camptothecin	cytotoxic	TOP1	DNA replication	SN-09	SRRM2	HIST1H1C,MAGOH,RPL39L,RPS7,SRRM2,ZC3H11A	0.87
ALL	1003	Camptothecin	cytotoxic	TOP1	DNA replication	SN-10	CPSF1	CDKN2A,CPSF1,MDM2,RBBP6,RPL39L,UBA52,WDR33	0.87
ALL	1003	Camptothecin	cytotoxic	TOP1	DNA replication	SN-11	DNMT3B	AMD1,DNMT3B,OAT,ODC1,SAT2	0.91
ALL	1003	Camptothecin	cytotoxic	TOP1	DNA replication	SN-12	LHX5	BAMBI,LHX5,LRP6,RPL39L,RPS27A,SFRP5,WNT5B	0.87
ALL	1003	Camptothecin	cytotoxic	TOP1	DNA replication	SN-13	TLN2	ITGB2,PRKCB,PTK2B,TLN2,VAV1	0.83
ALL	1003	Camptothecin	cytotoxic	TOP1	DNA replication	SN-14	ALKBH7	ALKBH1,ALKBH7,ALKBH8,OAT,TRMT112,TUBB6,UBC	0.87
ALL	1003	Camptothecin	cytotoxic	TOP1	DNA replication	SN-15	LRP1	CCT2,CCT6B,HSP90B1,LRP1,TUBB6	0.87
ALL	1003	Camptothecin	cytotoxic	TOP1	DNA replication	SN-16	CDC42BPA	ARHGEF3,CDC42,CDC42BPA,DOCK10	0.91
ALL	1003	Camptothecin	cytotoxic	TOP1	DNA replication	SN-17	SIN3B	BMI1,CDKN2A,RPL39L,RPS27A,SIN3B,SKI,ZBTB16	0.87
ALL	1003	Camptothecin	cytotoxic	TOP1	DNA replication	SN-18	MBD6	EXOSC8,HIST1H1C,MBD6,TUBB6,UBC,UPF1,XRN1	0.91
ALL	1003	Camptothecin	cytotoxic	TOP1	DNA replication	SN-19	PCNT	DYNC1H1,KIF26A,PCNT,TUBB6	0.87
ALL	1003	Camptothecin	cytotoxic	TOP1	DNA replication	SN-20	FBN2	CDKN1A,CDKN2A,FBN2,MFAP2,NOTCH1,OAT,UBC	0.87
ALL	1003	Camptothecin	cytotoxic	TOP1	DNA replication	SN-21	LTBP1	BAMBI,CCNT1,FN1,LTBP1,PRKAR1B,SYK,TGFB1	0.87
ALL	1003	Camptothecin	cytotoxic	TOP1	DNA replication	SN-22	ESPL1	ESPL1,RPL39L,RPS27,TAOK1	0.87
ALL	1003	Camptothecin	cytotoxic	TOP1	DNA replication	SN-23	PRPF8	PRPF8,RPL3,RPL39L,UPF3B	0.87
ALL	1003	Camptothecin	cytotoxic	TOP1	DNA replication	SN-24	DNAH8	CDKN2A,DCTN3,DNAH8,FBXO43,NPM1,PLK1,TPR	0.87
ALL	1003	Camptothecin	cytotoxic	TOP1	DNA replication	SN-25	LRP1	A2M,ARHGEF3,ITGB2,LRP1	0.87
ALL	1003	Camptothecin	cytotoxic	TOP1	DNA replication	SN-26	LTBR	LTBR,OAT,RFFL,SYK,TNFRSF1A,TRAF3,UBC	0.83
ALL	1003	Camptothecin	cytotoxic	TOP1	DNA replication	SN-27	ABCA7	ABCA7,ABCG1,APOA1,PLIN2,TGS1	0.83
ALL	1003	Camptothecin	cytotoxic	TOP1	DNA replication	SN-28	DNAH8	DNAH8,DYNC1H1,HSPA8,RPL39L,TUBB6,UBA52,WDTC1	0.83
ALL	1003	Camptothecin	cytotoxic	TOP1	DNA replication	SN-29	DNMT3B	CDKN2A,DNMT3B,RPL39L,RPS3,SUMO1,SUZ12,TTF1	0.78
ALL	1003	Camptothecin	cytotoxic	TOP1	DNA replication	SN-30	DUOX2	ARHGEF3,DECR1,DUOX2,PRKCB,RAC1	0.83
ALL	1003	Camptothecin	cytotoxic	TOP1	DNA replication	SN-31	FBN2	FBN2,HIST1H1C,JAG1,MFAP5,RPL39L,RPS27A,UBC	0.83
ALL	1003	Camptothecin	cytotoxic	TOP1	DNA replication	SN-32	CDK12	CCNT1,CDK12,POLR2A,RPL39L,RPS27A,TAF12,TCEB2	0.83
ALL	1003	Camptothecin	cytotoxic	TOP1	DNA replication	SN-33	DNAH9	DNAH11,DNAH9,DYNLL1,FOXJ1,KIF26A,TUBB6,UBC	0.83
ALL	1003	Camptothecin	cytotoxic	TOP1	DNA replication	SN-34	HMCN1	BAMBI,HMCN1,OAT,SIRPG,TGFB1,UBC,VEGFA	0.78
ALL	1003	Camptothecin	cytotoxic	TOP1	DNA replication	SN-35	ZNF423	CCNT1,CDK8,CDKN2A,EBF1,EGR1,TGFB1,ZNF423	0.83
ALL	1003	Camptothecin	cytotoxic	TOP1	DNA replication	SN-36	RAD54L	ABL1,CDKN2A,GNB2L1,RAD52,RAD54L,RPL39L,WRN	0.87
ALL	1003	Camptothecin	cytotoxic	TOP1	DNA replication	SN-37	HMCN1	CDKN2A,ERBB4,HMCN1,PIK3CA,SIRPG,SYK,VWF	0.83
ALL	1003	Camptothecin	cytotoxic	TOP1	DNA replication	SN-38	MYH2	ACTB,CDKN2A,MYC,MYH2,TBC1D4,TUBB6,VAMP2	0.78
ALL	1003	Camptothecin	cytotoxic	TOP1	DNA replication	SN-39	CXADR	AMICA1,CCNT1,CXADR,ITGA4,ITGB1,ITGB2,PRKACB	0.78
ALL	1003	Camptothecin	cytotoxic	TOP1	DNA replication	SN-40	TRPV3	CDK1,CDKN2A,TRPM8,TRPV3,USP10	0.78
ALL	1003	Camptothecin	cytotoxic	TOP1	DNA replication	SN-41	LAG3	CD8A,FYN,GNB2L1,LAG3,RPL39L,SYK,VAV1	0.78
ALL	1003	Camptothecin	cytotoxic	TOP1	DNA replication	SN-42	SHANK2	ABL1,CDKN2A,DNM2,PRKCH,SHANK2,SRC,VAV1	0.74
ALL	1003	Camptothecin	cytotoxic	TOP1	DNA replication	SN-43	PYGM	HIF1A,OAT,PGM1,PLIN2,PYGM,SAT2,UBC	0.78
ALL	1003	Camptothecin	cytotoxic	TOP1	DNA replication	SN-44	CELSR1	BAMBI,CELSR1,DVL2,FZD6,NKD2	0.83
ALL	1003	Camptothecin	cytotoxic	TOP1	DNA replication	SN-45	ZNF423	DVL3,EBF1,NKD2,RPL39L,RPS27A,WNT1,ZNF423	0.83
ALL	1003	Camptothecin	cytotoxic	TOP1	DNA replication	SN-46	EGFR	CCNT1,EGFR,PRKACB,RPL39L,UBA52,UBASH3B,YWHAZ	0.83
ALL	1003	Camptothecin	cytotoxic	TOP1	DNA replication	SN-47	NEB	ITGB2,NEB,SYK,TLN1,TPM4,UBASH3B	0.78
ALL	1003	Camptothecin	cytotoxic	TOP1	DNA replication	SN-48	LRP1	GNB2L1,ITGB2,LRP1,PRKCH,RPL39L,SHC1,SRC	0.83
ALL	1003	Camptothecin	cytotoxic	TOP1	DNA replication	SN-49	EGFR,TRPV3	EGFR,PRKCB,RPL39L,RPS27A,TRPM8,TRPV1,TRPV3	0.83
ALL	1003	Camptothecin	cytotoxic	TOP1	DNA replication	SN-50	NID2	GNB2L1,HSPG2,NID2,PRKCB,RPL39L,SDC2,TTR	0.83
ALL	1004	Vinblastine	cytotoxic	Microtubules	cytoskeleton	SN-01	HERC1,TP53	BEX1,HERC1,MGMT,TCEAL4,TP53,TRAF6,UBC	0.78
ALL	1004	Vinblastine	cytotoxic	Microtubules	cytoskeleton	SN-02	MYH2	CHRM3,GNB1,ITGAL,ITGB1,MYH2,RHOA	0.83
ALL	1004	Vinblastine	cytotoxic	Microtubules	cytoskeleton	SN-03	EGFR	CHRM3,EGFR,GNA15,SLC9A3R1	0.87
ALL	1004	Vinblastine	cytotoxic	Microtubules	cytoskeleton	SN-04	PCNT	CHRM3,GNG2,ITGAL,ITGB4,PCNT,PRKACA,YWHAG	0.87
ALL	1004	Vinblastine	cytotoxic	Microtubules	cytoskeleton	SN-05	LAG3	CCR7,CCR8,CD8A,ITGAL,LAG3,PTPRC	0.91
ALL	1004	Vinblastine	cytotoxic	Microtubules	cytoskeleton	SN-06	TRPV3	TCEAL4,TRPM8,TRPV3,UBC,USP10,YOD1,ZNRF3	0.87
ALL	1004	Vinblastine	cytotoxic	Microtubules	cytoskeleton	SN-07	ARID1A	ACTB,ARID1A,IL32,PRKCD	0.91
ALL	1004	Vinblastine	cytotoxic	Microtubules	cytoskeleton	SN-08	TLN2	CHRM3,ITGAL,ITGB2,KNG1,SELPLG,TLN2,VAV1	0.91
ALL	1004	Vinblastine	cytotoxic	Microtubules	cytoskeleton	SN-09	RYR1	CCR8,CHRM3,GRM5,HOMER1,RYR1,SAA1	0.91
ALL	1004	Vinblastine	cytotoxic	Microtubules	cytoskeleton	SN-10	LHX5	CEBPA,IL32,LHX5,PRTN3,SFRP5,WNT1	0.91
ALL	1004	Vinblastine	cytotoxic	Microtubules	cytoskeleton	SN-11	DUOX2	AGT,CHRM3,DECR1,DUOX2,IL32,PRKCD,VCAM1	0.91
ALL	1004	Vinblastine	cytotoxic	Microtubules	cytoskeleton	SN-12	MUC4	CHRM3,ERBB2,MUC4,PIK3CA,ST3GAL4	0.91
ALL	1004	Vinblastine	cytotoxic	Microtubules	cytoskeleton	SN-13	SIN3B,TP53	CHRM3,EDN2,SIN3B,TP53	0.91
ALL	1004	Vinblastine	cytotoxic	Microtubules	cytoskeleton	SN-14	DNAH8	BEX1,DNAH8,NGF,NGFRAP1,NTRK1	0.91
ALL	1004	Vinblastine	cytotoxic	Microtubules	cytoskeleton	SN-15	SNX33	BEX1,DNM1,NGF,SNX33,SNX9,UBC,YOD1	0.91
ALL	1004	Vinblastine	cytotoxic	Microtubules	cytoskeleton	SN-16	MBD6	CHRM3,EXOSC8,IL8,MBD6,NMS	0.91
ALL	1004	Vinblastine	cytotoxic	Microtubules	cytoskeleton	SN-17	MYCBP2	CHRM3,ESR1,FBXO45,GNA15,MYCBP2,SKP1,UBE2M	0.91
ALL	1004	Vinblastine	cytotoxic	Microtubules	cytoskeleton	SN-18	COL14A1	CHRM3,COL14A1,EDNRA,MMP1	0.91
ALL	1004	Vinblastine	cytotoxic	Microtubules	cytoskeleton	SN-19	SHANK2	CHRM3,DLG4,HTR2A,SHANK2	0.87
ALL	1004	Vinblastine	cytotoxic	Microtubules	cytoskeleton	SN-20	SRRM2	BEX1,RPS27A,SRRM1,SRRM2,TRAF6,UPF3B,YOD1	0.87
ALL	1004	Vinblastine	cytotoxic	Microtubules	cytoskeleton	SN-21	OBSCN,TRIO	CHRM3,OBSCN,TAGAP,TRIO	0.87
ALL	1004	Vinblastine	cytotoxic	Microtubules	cytoskeleton	SN-22	ARID1A	ARID1A,CHRM3,CREBBP,EDN1	0.87
ALL	1004	Vinblastine	cytotoxic	Microtubules	cytoskeleton	SN-23	CRTC1	CHRM3,CRTC1,FOS,TGFB1,TRH	0.87
ALL	1004	Vinblastine	cytotoxic	Microtubules	cytoskeleton	SN-24	LHX5	CHRM3,GNA15,LHX5,LRP6,MAPK8,SFRP5,WNT8B	0.87
ALL	1004	Vinblastine	cytotoxic	Microtubules	cytoskeleton	SN-25	TRPV3	CHRM3,TAC1,TRH,TRPM8,TRPV1,TRPV3,UTS2D	0.87
ALL	1004	Vinblastine	cytotoxic	Microtubules	cytoskeleton	SN-26	FBN2	APP,CHRM3,FBN1,FBN2,HSPG2,ITGAL,ITGB3	0.87
ALL	1004	Vinblastine	cytotoxic	Microtubules	cytoskeleton	SN-27	DNAH9	BCL6,CHRM3,DNAH9,DYNLL1,GNA15,PRKACA,UBC	0.87
ALL	1004	Vinblastine	cytotoxic	Microtubules	cytoskeleton	SN-28	ALKBH7	ALKBH1,ALKBH7,ALKBH8,TRMT112,UBC,YOD1,ZUFSP	0.87
ALL	1004	Vinblastine	cytotoxic	Microtubules	cytoskeleton	SN-29	RYR3	CHRM3,FKBP1A,GRK5,RYR3,SNCA	0.87
ALL	1004	Vinblastine	cytotoxic	Microtubules	cytoskeleton	SN-30	LTBR	BEX1,CHRM3,GNA15,LTBR,MAP2K3,TRAF2,TRAF6	0.87
ALL	1004	Vinblastine	cytotoxic	Microtubules	cytoskeleton	SN-31	CDC42BPA,TRIO	CDC42,CDC42BPA,CHRM3,MYL2,TCEAL4,TRIO,UBC	0.87
ALL	1004	Vinblastine	cytotoxic	Microtubules	cytoskeleton	SN-32	KALRN	BEX1,CHRM3,KALRN,NGFR,NGFRAP1,SOS1,XCR1	0.87
ALL	1004	Vinblastine	cytotoxic	Microtubules	cytoskeleton	SN-33	RYR3	BEX1,F11R,FKBP1A,ITGAL,RYR3,TGFBR1,TRAF6	0.87
ALL	1004	Vinblastine	cytotoxic	Microtubules	cytoskeleton	SN-34	ZNF423	BDKRB2,CHRM3,CREBBP,EBF1,TCF3,TGFB1,ZNF423	0.87
ALL	1004	Vinblastine	cytotoxic	Microtubules	cytoskeleton	SN-35	LAMA3	ASAP2,CHRM1,CHRM3,LAMA3,RAC1	0.87
ALL	1004	Vinblastine	cytotoxic	Microtubules	cytoskeleton	SN-36	COL14A1	BEX1,CHRM3,COL14A1,KISS1,MMP7,MMP9,NGF	0.87
ALL	1004	Vinblastine	cytotoxic	Microtubules	cytoskeleton	SN-37	USH2A	CHRM3,GNA14,NGFRAP1,NINL,PRKACA,USH2A,YWHAE	0.87
ALL	1004	Vinblastine	cytotoxic	Microtubules	cytoskeleton	SN-38	SRRM2	CHRM3,GNB1,RBM25,RBM39,SRRM2,UBC,YOD1	0.87
ALL	1004	Vinblastine	cytotoxic	Microtubules	cytoskeleton	SN-39	HMCN1	CHRM3,ERBB4,HMCN1,PIK3CA,SIRPG,SLC25A4,UBC	0.87
ALL	1004	Vinblastine	cytotoxic	Microtubules	cytoskeleton	SN-40	NID2	ITGAL,ITGB1,MMP15,NID1,NID2,TCEAL4,UBC	0.87
ALL	1004	Vinblastine	cytotoxic	Microtubules	cytoskeleton	SN-41	ABCA7	ABCA7,APOA1,BCL6,CHRM3,JUN,SAA1,TTR	0.87
ALL	1004	Vinblastine	cytotoxic	Microtubules	cytoskeleton	SN-42	MYCBP2	MYCBP2,NUP62,RAE1,S100A4,SNRPF,TCEAL4,UBC	0.87
ALL	1006	Cytarabine	cytotoxic	DNA synthesis	DNA replication	SN-01	CELSR1	CELSR1,CTHRC1,FZD6	0.78
ALL	1006	Cytarabine	cytotoxic	DNA synthesis	DNA replication	SN-02	CRTC1	CDKN2A,CREB1,CRTC1,JUN,MEIS1,RORA,RORB	0.96
ALL	1006	Cytarabine	cytotoxic	DNA synthesis	DNA replication	SN-03	SIN3B	CDKN2A,RBBP7,SIN3B,ZBTB16	0.91
ALL	1006	Cytarabine	cytotoxic	DNA synthesis	DNA replication	SN-04	CDK12	CCND2,CDK12,CDKN2A,POLR2A,TAF12	0.91
ALL	1006	Cytarabine	cytotoxic	DNA synthesis	DNA replication	SN-05	ARID1A	ARID1A,CDKN2A,EGR1,IRF3	0.91
ALL	1006	Cytarabine	cytotoxic	DNA synthesis	DNA replication	SN-06	SMC4	CDKN2A,RB1,RUNX2,SMC4	0.91
ALL	1006	Cytarabine	cytotoxic	DNA synthesis	DNA replication	SN-07	OBSCN	CDKN2A,OBSCN,RHOC,UBC	0.87
ALL	1006	Cytarabine	cytotoxic	DNA synthesis	DNA replication	SN-08	DNMT3B	CDKN2A,DNMT3B,EZH2,RUNX3	0.87
ALL	1006	Cytarabine	cytotoxic	DNA synthesis	DNA replication	SN-09	SRRM2	AR,CDKN2A,KAT5,PRPF6,RORB,SRRM2,YBX1	0.87
ALL	1006	Cytarabine	cytotoxic	DNA synthesis	DNA replication	SN-10	CPSF1	CDKN2A,CEBPB,CPSF1,ESR1,RBBP6,RORB,SYMPK	0.87
ALL	1006	Cytarabine	cytotoxic	DNA synthesis	DNA replication	SN-11	PCNT	CDK1,CDKN2A,PCNT,TUBG2	0.96
ALL	1006	Cytarabine	cytotoxic	DNA synthesis	DNA replication	SN-12	HERC1,TP53	CDKN2A,HERC1,RORB,RUNX3,TP53,UBC,VDR	0.96
ALL	1006	Cytarabine	cytotoxic	DNA synthesis	DNA replication	SN-13	ABCA7	ABCA7,APOA1,CDKN2A,SP1	0.96
ALL	1006	Cytarabine	cytotoxic	DNA synthesis	DNA replication	SN-14	NEB	ABL1,CDKN2A,CTTN,DMD,NEB,TPM4	0.96
ALL	1006	Cytarabine	cytotoxic	DNA synthesis	DNA replication	SN-15	DNAH9	CCND2,CDKN2A,DNAH9,FOXJ1,MED1,PITX2,RORB	0.91
ALL	1006	Cytarabine	cytotoxic	DNA synthesis	DNA replication	SN-16	MYCBP2	CDKN2A,MYCBP2,NPM1,RAE1	0.91
ALL	1006	Cytarabine	cytotoxic	DNA synthesis	DNA replication	SN-17	DUOX2	CDKN2A,DECR1,DUOX2,MAPK14	0.91
ALL	1006	Cytarabine	cytotoxic	DNA synthesis	DNA replication	SN-18	RAD54L	CDKN2A,RAD54L,RECQL,TOP1	0.91
ALL	1006	Cytarabine	cytotoxic	DNA synthesis	DNA replication	SN-19	MBD6	CDKN1B,CDKN2A,EXOSC8,MBD6,TNPO1,YWHAB	0.91
ALL	1006	Cytarabine	cytotoxic	DNA synthesis	DNA replication	SN-20	LTBP1	CDKN1A,CDKN2A,LTBP1,TGFB1	0.91
ALL	1006	Cytarabine	cytotoxic	DNA synthesis	DNA replication	SN-21	RYR3	BAMBI,CDKN2A,FKBP1A,PARD3,RYR3,SMAD3	0.83
ALL	1006	Cytarabine	cytotoxic	DNA synthesis	DNA replication	SN-22	HMCN1	CDKN2A,EGR1,ERBB4,HMCN1,RUNX3,SIRPG,YAP1	0.83
ALL	1006	Cytarabine	cytotoxic	DNA synthesis	DNA replication	SN-23	ALKBH7	ALKBH1,ALKBH7,ALKBH8,CDKN2A,TRMT112,UBC,ZWINT	0.83
ALL	1006	Cytarabine	cytotoxic	DNA synthesis	DNA replication	SN-24	LRP1	ABL1,CDKN2A,GPC1,LRP1,PGR,RORB,SRC	0.83
ALL	1006	Cytarabine	cytotoxic	DNA synthesis	DNA replication	SN-25	USH2A	CDKN1B,CDKN2A,FBXO43,NINL,PLK1,USH2A,YWHAG	0.87
ALL	1006	Cytarabine	cytotoxic	DNA synthesis	DNA replication	SN-26	ESPL1	CBX4,CDKN2A,ESPL1,UBE2C	0.87
ALL	1006	Cytarabine	cytotoxic	DNA synthesis	DNA replication	SN-27	NID2	CDKN2A,HSPG2,NID2,SNCA,UCHL1	0.87
ALL	1006	Cytarabine	cytotoxic	DNA synthesis	DNA replication	SN-28	ERCC6	CCNT1,CDKN2A,ERCC6,MYC	0.87
ALL	1006	Cytarabine	cytotoxic	DNA synthesis	DNA replication	SN-29	TRPV3	CDKN1A,CDKN2A,PSMD2,TRPM8,TRPV3,UBLCP1,USP10	0.83
ALL	1006	Cytarabine	cytotoxic	DNA synthesis	DNA replication	SN-30	LAG3	CCND2,CD8A,CDKN2A,LAG3,RUNX3,STAT5A,ZBTB7B	0.83
ALL	1006	Cytarabine	cytotoxic	DNA synthesis	DNA replication	SN-31	CXADR	AMICA1,CD44,CDKN2A,CXADR,ITGB1,MYC,VCAM1	0.83
ALL	1006	Cytarabine	cytotoxic	DNA synthesis	DNA replication	SN-32	KALRN	CDKN2A,CTHRC1,FZD6,GNG2,KALRN,PIK3R1,XCL1	0.87
ALL	1006	Cytarabine	cytotoxic	DNA synthesis	DNA replication	SN-33	FBN2	CDKN2A,EFEMP1,FBN2,MFAP5,NOTCH1,RUNX2,SMAD4	0.83
ALL	1006	Cytarabine	cytotoxic	DNA synthesis	DNA replication	SN-34	LHX5	CDKN2A,FZD6,LHX5,MYC,SFRP5,WNT5A,WNT7B	0.83
ALL	1006	Cytarabine	cytotoxic	DNA synthesis	DNA replication	SN-35	PCNT,TP53	CDKN2A,CSNK1D,CTHRC1,DVL1,PCNT,TP53,YWHAG	0.83
ALL	1006	Cytarabine	cytotoxic	DNA synthesis	DNA replication	SN-36	NID2,TP53	CDKN2A,MMP9,NID1,NID2,PARD3,PRKCZ,TP53	0.83
ALL	1006	Cytarabine	cytotoxic	DNA synthesis	DNA replication	SN-37	LTBR	CDKN2A,CTHRC1,DVL3,LTBR,TRAF3,UBB,UBC	0.83
ALL	1006	Cytarabine	cytotoxic	DNA synthesis	DNA replication	SN-38	SRRM2,TP53	CBS,CDKN2A,HTT,PRPF40A,RBM25,SRRM2,TP53	0.87
ALL	1006	Cytarabine	cytotoxic	DNA synthesis	DNA replication	SN-39	DNAH8	CBS,CDKN2A,DNAH8,NPM1,NTRK1,TPR,UBC	0.87
ALL	1006	Cytarabine	cytotoxic	DNA synthesis	DNA replication	SN-40	CDC42BPA	ABL1,CDC42,CDC42BPA,CDKN2A,DVL1,FZD6,YES1	0.87
ALL	1006	Cytarabine	cytotoxic	DNA synthesis	DNA replication	SN-41	SNX33	ABL1,CDKN2A,DNM2,SNX33,SNX9,TAL1,UBC	0.87
ALL	1006	Cytarabine	cytotoxic	DNA synthesis	DNA replication	SN-42	ZNF423	CDKN2A,EBF1,EGR1,FZD6,RELA,WNT1,ZNF423	0.87
ALL	1008	Methotrexate	cytotoxic	Dihydrofolate reductase (DHFR)	DNA replication	SN-01	SMC4	PSAT1,SMC4,TAL1,UBC	0.82
ALL	1008	Methotrexate	cytotoxic	Dihydrofolate reductase (DHFR)	DNA replication	SN-02	TP53	ADCY5,NME1,PTGER2,TP53	0.86
ALL	1008	Methotrexate	cytotoxic	Dihydrofolate reductase (DHFR)	DNA replication	SN-03	RYR1	CACNA1A,GNB1,PTGER2,RYR1	0.86
ALL	1008	Methotrexate	cytotoxic	Dihydrofolate reductase (DHFR)	DNA replication	SN-04	ERCC6	ADCY8,ERCC6,POLR2L,PTGER2	0.91
ALL	1008	Methotrexate	cytotoxic	Dihydrofolate reductase (DHFR)	DNA replication	SN-05	SRRM2	MAGOH,NPSR1,PTGER2,RPSA,SRRM2	0.91
ALL	1008	Methotrexate	cytotoxic	Dihydrofolate reductase (DHFR)	DNA replication	SN-06	CDK12	ADCY2,CDK12,POLR2A,PTGER2	0.91
ALL	1008	Methotrexate	cytotoxic	Dihydrofolate reductase (DHFR)	DNA replication	SN-07	DUOX2	DECR1,DHFR,DUOX2,GGH,NOS3,TXNIP	0.95
ALL	1008	Methotrexate	cytotoxic	Dihydrofolate reductase (DHFR)	DNA replication	SN-08	CRTC1	CRTC1,FOS,NPS,PTGER2	0.91
ALL	1008	Methotrexate	cytotoxic	Dihydrofolate reductase (DHFR)	DNA replication	SN-09	DNMT3B	DNMT3B,MC1R,MITF,PTGER2,SUMO1	0.95
ALL	1008	Methotrexate	cytotoxic	Dihydrofolate reductase (DHFR)	DNA replication	SN-10	ABCA7	ABCA7,APOA1,CALCA,GLIPR1,PTGER2,TGS1	0.95
ALL	1008	Methotrexate	cytotoxic	Dihydrofolate reductase (DHFR)	DNA replication	SN-11	TLN2	GNAS,ITGB1,PRKCA,PTGER2,TLN2	0.95
ALL	1008	Methotrexate	cytotoxic	Dihydrofolate reductase (DHFR)	DNA replication	SN-12	RYR1	DHFR,GGH,PSAT1,QDPR,RYR1,SPR,UBC	0.91
ALL	1008	Methotrexate	cytotoxic	Dihydrofolate reductase (DHFR)	DNA replication	SN-13	DNAH8	DNAH8,PAFAH1B1,PTGER2,SCTR,TUBA1C	0.91
ALL	1008	Methotrexate	cytotoxic	Dihydrofolate reductase (DHFR)	DNA replication	SN-14	SNX33	CDKN2A,PTGER2,SNX33,SNX9,UBC,VIPR1,WASL	0.91
ALL	1008	Methotrexate	cytotoxic	Dihydrofolate reductase (DHFR)	DNA replication	SN-15	PFKFB2	AKT1,GCG,PFKFB2,PTGER2	0.91
ALL	1008	Methotrexate	cytotoxic	Dihydrofolate reductase (DHFR)	DNA replication	SN-16	LRP1	LRP1,PTGER2,PTGER4,SRC	0.91
ALL	1008	Methotrexate	cytotoxic	Dihydrofolate reductase (DHFR)	DNA replication	SN-17	LTBR	GNAS,LTBR,PTGER2,SMPD3,TRAF2,TRAF5,UBC	0.91
ALL	1008	Methotrexate	cytotoxic	Dihydrofolate reductase (DHFR)	DNA replication	SN-18	SIN3B,TP53	HDAC1,NDN,SIN3B,TAL1,TP53	0.91
ALL	1008	Methotrexate	cytotoxic	Dihydrofolate reductase (DHFR)	DNA replication	SN-19	TRPV3	ADRB2,CFTR,PTGER2,TRPM8,TRPV3,USP10	0.91
ALL	1008	Methotrexate	cytotoxic	Dihydrofolate reductase (DHFR)	DNA replication	SN-20	SRRM2	ADCY2,POLR2L,PTGER2,SNRPD1,SRRM1,SRRM2,YBX1	0.91
ALL	1008	Methotrexate	cytotoxic	Dihydrofolate reductase (DHFR)	DNA replication	SN-21	OBSCN	ARHGEF1,GNG2,OBSCN,PTGER2	0.91
ALL	1008	Methotrexate	cytotoxic	Dihydrofolate reductase (DHFR)	DNA replication	SN-22	SHANK2	ADRB1,DLG4,PTGER2,SHANK2	0.91
ALL	1008	Methotrexate	cytotoxic	Dihydrofolate reductase (DHFR)	DNA replication	SN-23	MBD6	EXOSC8,IL8,MBD6,POMC,PTGER2	0.91
ALL	1008	Methotrexate	cytotoxic	Dihydrofolate reductase (DHFR)	DNA replication	SN-24	CPSF1	CPSF1,DHFR,E2F1,GGH,MDM2,NDN,RBBP6	0.91
ALL	1008	Methotrexate	cytotoxic	Dihydrofolate reductase (DHFR)	DNA replication	SN-25	COL14A1	COL14A1,COL9A3,DHFR,GGH,MMP9,SMAD3,SP1	0.91
ALL	1008	Methotrexate	cytotoxic	Dihydrofolate reductase (DHFR)	DNA replication	SN-26	NID2	HSPG2,IAPP,NID2,PRL,PTGER2	0.91
ALL	1008	Methotrexate	cytotoxic	Dihydrofolate reductase (DHFR)	DNA replication	SN-27	USH2A	FSHR,NINL,PPP2R1A,PTGER2,USH2A,YWHAQ	0.91
ALL	1008	Methotrexate	cytotoxic	Dihydrofolate reductase (DHFR)	DNA replication	SN-28	LTBP1	ADCY1,KNG1,LTBP1,PTGER2,TGFB1	0.91
ALL	1008	Methotrexate	cytotoxic	Dihydrofolate reductase (DHFR)	DNA replication	SN-29	RYR3	ADCY6,FKBP1B,PTGER2,RYR2,RYR3,SNAPIN	0.91
ALL	1008	Methotrexate	cytotoxic	Dihydrofolate reductase (DHFR)	DNA replication	SN-30	ZNF423	EBF1,FZD6,TAL1,TCF3,WNT10B,ZNF423	0.91
ALL	1008	Methotrexate	cytotoxic	Dihydrofolate reductase (DHFR)	DNA replication	SN-31	ALKBH7	ALKBH1,ALKBH7,ALKBH8,TRMT112,TXNIP,UBC	0.91
ALL	1008	Methotrexate	cytotoxic	Dihydrofolate reductase (DHFR)	DNA replication	SN-32	CXADR	AMICA1,CXADR,GNG2,ITGB1,PTGER2,RHOA,VEGFC	0.91
ALL	1008	Methotrexate	cytotoxic	Dihydrofolate reductase (DHFR)	DNA replication	SN-33	TP53	BDNF,CDKN2A,MC4R,NDN,PTGER2,TP53,ZNF274	0.91
ALL	1008	Methotrexate	cytotoxic	Dihydrofolate reductase (DHFR)	DNA replication	SN-34	TRIO	ARHGAP29,PTGER2,PTGIR,TBXA2R,TRIO	0.91
ALL	1008	Methotrexate	cytotoxic	Dihydrofolate reductase (DHFR)	DNA replication	SN-35	LAG3	ADCY2,CD8A,FGR,LAG3,PTGER2,S1PR1,ZAP70	0.91
ALL	1008	Methotrexate	cytotoxic	Dihydrofolate reductase (DHFR)	DNA replication	SN-36	HMCN1	HMCN1,POMC,PROS1,PTGER2,S1PR1,SIRPG,VEGFA	0.91
ALL	1008	Methotrexate	cytotoxic	Dihydrofolate reductase (DHFR)	DNA replication	SN-37	CDK12	ADCY7,CDK12,POLR2L,PTGER2,SUPT5H,TAL1,UBC	0.91
ALL	1008	Methotrexate	cytotoxic	Dihydrofolate reductase (DHFR)	DNA replication	SN-38	LHX5	FZD6,GNG2,LHX5,PTGER2,SFRP5,WNT11,WNT7B	0.91
ALL	1008	Methotrexate	cytotoxic	Dihydrofolate reductase (DHFR)	DNA replication	SN-39	SHANK2	CTTN,PSAT1,PTGER2,PTH,SHANK2,SLC9A3,UBC	0.91
ALL	1008	Methotrexate	cytotoxic	Dihydrofolate reductase (DHFR)	DNA replication	SN-40	NEB	ACTN2,ADCY5,NEB,PIK3R1,PTGER2,S1PR1,VIM	0.91
ALL	1008	Methotrexate	cytotoxic	Dihydrofolate reductase (DHFR)	DNA replication	SN-41	FBN2	FBN2,FZD6,GNB1,MFAP2,NOTCH1,PTGER2,WNT5A	0.91
ALL	1008	Methotrexate	cytotoxic	Dihydrofolate reductase (DHFR)	DNA replication	SN-42	MYCBP2	ASNS,HRH2,MAGOH,MYCBP2,PTGER2,RAE1,UBC	0.91
ALL	1008	Methotrexate	cytotoxic	Dihydrofolate reductase (DHFR)	DNA replication	SN-43	KALRN	KALRN,KIT,NPSR1,PTGER2,RAC1,TAL1,XCR1	0.91
ALL	1008	Methotrexate	cytotoxic	Dihydrofolate reductase (DHFR)	DNA replication	SN-44	FBN2	FBN2,FURIN,NDN,NGF,PTGER2,PTH,SPP1	0.91
ALL	1008	Methotrexate	cytotoxic	Dihydrofolate reductase (DHFR)	DNA replication	SN-45	BCL11B	BCL11B,FOS,HDAC1,NOTCH1,POMC,PTGER2,TAL1	0.91
ALL	1008	Methotrexate	cytotoxic	Dihydrofolate reductase (DHFR)	DNA replication	SN-46	DUOX2	ALDH1A2,DECR1,DUOX2,GNB1,HSD17B6,PRKCB,PTGER2	0.91
ALL	1008	Methotrexate	cytotoxic	Dihydrofolate reductase (DHFR)	DNA replication	SN-47	TLN2	ADCY1,CAPN2,PRKAR2A,PTGER2,PXN,RAB32,TLN2	0.91
ALL	1009	ATRA	targeted	Retinoic acid and retinoid X receptor agonist	other	SN-01	EGFR	EGFR,PPARA,SRGN,TSPO,VEGFA	0.82
ALL	1009	ATRA	targeted	Retinoic acid and retinoid X receptor agonist	other	SN-02	CRTC1	CRTC1,FOS,LYN,SYK,TSPO	0.86
ALL	1009	ATRA	targeted	Retinoic acid and retinoid X receptor agonist	other	SN-03	NID2	CTSS,HSPG2,NID2,SNCA,SRGN,SYK,VEGFA	0.86
ALL	1009	ATRA	targeted	Retinoic acid and retinoid X receptor agonist	other	SN-04	LTBP1	FN1,LTBP1,SRGN,SYK,TSPO,VHL,VWF	0.82
ALL	1009	ATRA	targeted	Retinoic acid and retinoid X receptor agonist	other	SN-05	TP53	PADI4,S100A4,TP53	0.86
ALL	1009	ATRA	targeted	Retinoic acid and retinoid X receptor agonist	other	SN-06	TRIO	PREX1,RAC2,SYK,TRIO	0.86
ALL	1009	ATRA	targeted	Retinoic acid and retinoid X receptor agonist	other	SN-07	DNMT3B	AHCYL1,DNMT3B,INS,ITPR1,TSPO	0.91
ALL	1009	ATRA	targeted	Retinoic acid and retinoid X receptor agonist	other	SN-08	HERC1	HERC1,LGALS1,TSPO,UBC,VDAC1	0.91
ALL	1009	ATRA	targeted	Retinoic acid and retinoid X receptor agonist	other	SN-09	ZNF423	CEBPA,EBF1,FOS,SRGN,TGFB1,TSPO,ZNF423	0.91
ALL	1009	ATRA	targeted	Retinoic acid and retinoid X receptor agonist	other	SN-10	OBSCN	A2M,ALB,OBSCN,PLEK,SRGN,TSPO,TTN	0.82
ALL	1009	ATRA	targeted	Retinoic acid and retinoid X receptor agonist	other	SN-11	COL14A1	COL14A1,COL1A1,INS,MMP9,SPARC,SRGN,TSPO	0.82
ALL	1009	ATRA	targeted	Retinoic acid and retinoid X receptor agonist	other	SN-12	CELSR1	CELSR1,PPARA,RORA,RXRA,TSPO,VANGL2,VDR	0.86
ALL	1009	ATRA	targeted	Retinoic acid and retinoid X receptor agonist	other	SN-13	SMC4	LYN,MEF2C,PPARA,RB1,SMC4,TSPO,UBC	0.86
ALL	1009	ATRA	targeted	Retinoic acid and retinoid X receptor agonist	other	SN-14	DUOX2	ALB,DECR1,DUOX2,PREX1,RAC2,TSPO,VCAM1	0.82
ALL	1009	ATRA	targeted	Retinoic acid and retinoid X receptor agonist	other	SN-15	KALRN	CD8A,GPR65,KALRN,TSPO,VAV1	0.86
ALL	1009	ATRA	targeted	Retinoic acid and retinoid X receptor agonist	other	SN-16	TLN2	CD8A,CSK,ITGB1,PLEK,TLN2,TSPO,VCL	0.91
ALL	1009	ATRA	targeted	Retinoic acid and retinoid X receptor agonist	other	SN-17	MBD6	CCL5,EXOSC8,IL8,MBD6,PNPT1,TSPO,VWF	0.86
ALL	1009	ATRA	targeted	Retinoic acid and retinoid X receptor agonist	other	SN-18	PYGM	DDX41,GYG1,PHKG1,PYGM,TSPO,UBB	0.86
ALL	1009	ATRA	targeted	Retinoic acid and retinoid X receptor agonist	other	SN-19	PYGM	ALDOA,GAPDH,PFKM,PHKB,PYGM,SRGN,TSPO	0.86
ALL	1009	ATRA	targeted	Retinoic acid and retinoid X receptor agonist	other	SN-20	TRPV3	PLCG2,PRKCE,TRPM8,TRPV1,TRPV3,TSPO,VDAC1	0.86
ALL	1009	ATRA	targeted	Retinoic acid and retinoid X receptor agonist	other	SN-21	LTBR	CD40,CD8A,LTBR,TNFRSF10A,TRAF2,TRAF5,TSPO	0.91
ALL	1009	ATRA	targeted	Retinoic acid and retinoid X receptor agonist	other	SN-22	SHANK2	CD8A,DLG4,FYN,SHANK2,SRC,SYK,TSPO	0.86
ALL	1009	ATRA	targeted	Retinoic acid and retinoid X receptor agonist	other	SN-23	LHX5	LHX5,PREX1,RAC1,SFRP5,SYK,WNT11,WNT8B	0.91
ALL	1009	ATRA	targeted	Retinoic acid and retinoid X receptor agonist	other	SN-24	BCL11B	BCL11B,NOTCH1,SYK,TRAT1,UBC	0.95
ALL	1009	ATRA	targeted	Retinoic acid and retinoid X receptor agonist	other	SN-25	LAMA3	ACTA1,LAMA3,MAL,MEF2C,SRC,TRAT1	0.91
ALL	1009	ATRA	targeted	Retinoic acid and retinoid X receptor agonist	other	SN-26	ALKBH7	ALKBH1,ALKBH3,ALKBH7,ALKBH8,LGALS1,TRMT112,UBC	0.95
ALL	1009	ATRA	targeted	Retinoic acid and retinoid X receptor agonist	other	SN-27	DNAH8	CD8A,DNAH8,GZMB,HSPA4,TRAT1,TSPO,WDTC1	0.95
ALL	1009	ATRA	targeted	Retinoic acid and retinoid X receptor agonist	other	SN-28	LHX5	BMP4,LHX5,SFRP5,SRGN,VEGFA,WNT4,WNT7B	0.95
ALL	1009	ATRA	targeted	Retinoic acid and retinoid X receptor agonist	other	SN-29	CDC42BPA	CD8A,CDC42,CDC42BPA,GRAP2,MEF2C,MYL2,TSPO	0.95
ALL	1009	ATRA	targeted	Retinoic acid and retinoid X receptor agonist	other	SN-30	FBN2	CD3D,FBN2,FOS,MFAP2,NOTCH1,TRAT1,TSPO	0.95
ALL	1009	ATRA	targeted	Retinoic acid and retinoid X receptor agonist	other	SN-31	CXADR	AMICA1,CXADR,FIGF,ITGA4,SRC,SRGN,TRAT1	0.95
ALL	1009	ATRA	targeted	Retinoic acid and retinoid X receptor agonist	other	SN-32	MUC4	CD8A,LCK,LYN,MUC1,MUC4,TSPO,ZAP70	0.91
ALL	1009	ATRA	targeted	Retinoic acid and retinoid X receptor agonist	other	SN-33	SIN3B,TP53	JUP,PADI4,SIN3B,SRC,TERT,TP53,TRAT1	0.91
ALL	1009	ATRA	targeted	Retinoic acid and retinoid X receptor agonist	other	SN-34	DNAH9	CD8A,DNAH9,DYNLL2,GPHN,NCAM1,SPTBN2,TSPO	1
ALL	1009	ATRA	targeted	Retinoic acid and retinoid X receptor agonist	other	SN-35	USH2A	CD8A,DYNC1H1,ITGAX,NINL,TSPO,TUBG2,USH2A	1
ALL	1009	ATRA	targeted	Retinoic acid and retinoid X receptor agonist	other	SN-36	HMCN1	HMCN1,SIRPG,SRC,TRAT1,TSPO,VEGFA,VWF	1
ALL	1009	ATRA	targeted	Retinoic acid and retinoid X receptor agonist	other	SN-37	CELSR1	CD3D,CD8A,CELSR1,FZD6,GNAO1,TSPO,WNT5B	0.91
ALL	1011	ABT-263	targeted	BCL2, BCL2L1, BCL2L2	apoptosis regulation	SN-01	SIN3B	CYP26A1,HDAC1,SIN3B,SRXN1,TGIF1,TLE3	1
ALL	1011	ABT-263	targeted	BCL2, BCL2L1, BCL2L2	apoptosis regulation	SN-02	TP53	CARM1,PLIN2,TP53	1
ALL	1011	ABT-263	targeted	BCL2, BCL2L1, BCL2L2	apoptosis regulation	SN-03	PFKFB2	IGF2BP1,PFKFB2,PSMA8,UBC	1
ALL	1011	ABT-263	targeted	BCL2, BCL2L1, BCL2L2	apoptosis regulation	SN-04	SRRM2	MAGOH,MRPL2,PRDX1,SRRM2,SRXN1,UBA52	1
ALL	1011	ABT-263	targeted	BCL2, BCL2L1, BCL2L2	apoptosis regulation	SN-05	LTBP1	CD44,FN1,LTBP1,MED1,PLIN2,TGFB1	1
ALL	1011	ABT-263	targeted	BCL2, BCL2L1, BCL2L2	apoptosis regulation	SN-06	SHANK2	ARG2,CTNNB1,DNM2,IGF2BP1,NOS3,SHANK2	1
ALL	1011	ABT-263	targeted	BCL2, BCL2L1, BCL2L2	apoptosis regulation	SN-07	DNMT3B	AMD1,ARG2,DNMT3B,ODC1,PSMA8	1
ALL	1011	ABT-263	targeted	BCL2, BCL2L1, BCL2L2	apoptosis regulation	SN-08	MUC4	B3GNT2,ERBB2,HIF1A,MUC4,PLIN2	1
ALL	1011	ABT-263	targeted	BCL2, BCL2L1, BCL2L2	apoptosis regulation	SN-09	LAG3	CD8A,LAG3,PLIN2,PPARA,SELL,STAT5B	1
ALL	1011	ABT-263	targeted	BCL2, BCL2L1, BCL2L2	apoptosis regulation	SN-10	NID2	CD44,HIF1A,MMP9,NID1,NID2,PLIN2,VEGFA	1
ALL	1011	ABT-263	targeted	BCL2, BCL2L1, BCL2L2	apoptosis regulation	SN-11	CDC42BPA	ARG2,CDC42,CDC42BPA,MRPL2,NOS3,UBA52,WASL	1
ALL	1011	ABT-263	targeted	BCL2, BCL2L1, BCL2L2	apoptosis regulation	SN-12	HERC1	HERC1,SLC25A4,SRXN1,UBA2,UBC	1
ALL	1011	ABT-263	targeted	BCL2, BCL2L1, BCL2L2	apoptosis regulation	SN-13	PCNT	ARG2,HSP90AA1,KCNH2,NOS1,PCNT	1
ALL	1011	ABT-263	targeted	BCL2, BCL2L1, BCL2L2	apoptosis regulation	SN-14	LAMA3	ARG2,LAMA3,MRPL2,NOS2,PLEC,RPSA,SRC	1
ALL	1011	ABT-263	targeted	BCL2, BCL2L1, BCL2L2	apoptosis regulation	SN-15	RYR3	ARG2,FKBP1B,IGF2BP1,NOS1,RYR2,RYR3,UBC	1
ALL	1011	ABT-263	targeted	BCL2, BCL2L1, BCL2L2	apoptosis regulation	SN-16	PRPF8	IGF2BP1,MRPL2,POLR2C,PRPF8,YBX1	1
ALL	1011	ABT-263	targeted	BCL2, BCL2L1, BCL2L2	apoptosis regulation	SN-17	TRPV3	MRPL2,PSMA8,PSMD2,TRPM8,TRPV3,UBA52,USP10	1
ALL	1011	ABT-263	targeted	BCL2, BCL2L1, BCL2L2	apoptosis regulation	SN-18	DNAH9	ARG2,DNAH9,DYNLL1,NOS3,PRKACA,PSMA8,UBC	1
ALL	1011	ABT-263	targeted	BCL2, BCL2L1, BCL2L2	apoptosis regulation	SN-19	DUOX2	AOX1,ARG2,CYP26A1,DECR1,DUOX2,NOS3,XDH	1
ALL	1011	ABT-263	targeted	BCL2, BCL2L1, BCL2L2	apoptosis regulation	SN-20	PCNT	CSNK1D,PCNT,PLIN2,TBL1XR1	1
ALL	1011	ABT-263	targeted	BCL2, BCL2L1, BCL2L2	apoptosis regulation	SN-21	LHX5	LHX5,NCOA2,PLIN2,SFRP5,WNT10B	1
ALL	1011	ABT-263	targeted	BCL2, BCL2L1, BCL2L2	apoptosis regulation	SN-22	ABCA7	ABCA7,APOA1,PLIN2,SMARCD3	1
ALL	1011	ABT-263	targeted	BCL2, BCL2L1, BCL2L2	apoptosis regulation	SN-23	CRTC1	ARG2,CRTC1,FOS,JAK2,NOS2,SRXN1,TRIP6	1
ALL	1011	ABT-263	targeted	BCL2, BCL2L1, BCL2L2	apoptosis regulation	SN-24	MBD6	ARG2,C1D,EXOSC8,MBD6,MYC,NOS2,ZFP36L1	1
ALL	1011	ABT-263	targeted	BCL2, BCL2L1, BCL2L2	apoptosis regulation	SN-25	EGFR,TRPV3	CD44,EGFR,PLIN2,PPARA,TRPM8,TRPV1,TRPV3	1
ALL	1011	ABT-263	targeted	BCL2, BCL2L1, BCL2L2	apoptosis regulation	SN-26	DUOX2	ACADM,CD44,DECR1,DUOX2,NCOA6,PLIN2,VCAM1	1
ALL	1011	ABT-263	targeted	BCL2, BCL2L1, BCL2L2	apoptosis regulation	SN-27	ARID1A	ARID1A,CD44,IGF2BP1,IRF6,NCOA1,PLIN2,VDR	1
ALL	1011	ABT-263	targeted	BCL2, BCL2L1, BCL2L2	apoptosis regulation	SN-28	ALKBH7	ALKBH1,ALKBH7,ALKBH8,ARG2,NOS2,TRMT112,UBC	1
ALL	1011	ABT-263	targeted	BCL2, BCL2L1, BCL2L2	apoptosis regulation	SN-29	SMC4	CD44,IGF2BP1,PLK1,PSMA8,RB1,SMC4,SP100	1
ALL	1011	ABT-263	targeted	BCL2, BCL2L1, BCL2L2	apoptosis regulation	SN-30	DNMT3B	DNMT3B,SIN3A,SRXN1,THADA	1
ALL	1011	ABT-263	targeted	BCL2, BCL2L1, BCL2L2	apoptosis regulation	SN-31	HMCN1	CD44,HMCN1,IGF2BP1,SIRPG,SYK,VAV2,VWF	1
ALL	1011	ABT-263	targeted	BCL2, BCL2L1, BCL2L2	apoptosis regulation	SN-32	FBN2	ADM,ARNT,FBN2,FURIN,MFAP4,MFAP5,PLIN2	1
ALL	1011	ABT-263	targeted	BCL2, BCL2L1, BCL2L2	apoptosis regulation	SN-33	HERC1,TP53	CD44,HERC1,IGF2BP1,MRPL2,TP53,UBA52,UBC	1
ALL	1011	ABT-263	targeted	BCL2, BCL2L1, BCL2L2	apoptosis regulation	SN-34	DNAH8	CREBBP,DNAH8,HSPA8,PLIN2,PSMA8,WDTC1	1
ALL	1011	ABT-263	targeted	BCL2, BCL2L1, BCL2L2	apoptosis regulation	SN-35	CDK12	CARM1,CDK12,IGF2BP1,PLIN2,POLR2A,SUPT5H,YBX1	1
ALL	1011	ABT-263	targeted	BCL2, BCL2L1, BCL2L2	apoptosis regulation	SN-36	NEB	ACTN2,IGF2BP1,NCOA2,NEB,PLIN2,UBC,VIM	1
ALL	1011	ABT-263	targeted	BCL2, BCL2L1, BCL2L2	apoptosis regulation	SN-37	USH2A	CDK1,NINL,PDZD7,PLIN2,PSMA8,TBL1XR1,USH2A	1
ALL	1011	ABT-263	targeted	BCL2, BCL2L1, BCL2L2	apoptosis regulation	SN-38	RYR1	ARG2,CALM1,NOS2,PLIN2,RYR1,TBL1XR1,ZW10	1
ALL	1011	ABT-263	targeted	BCL2, BCL2L1, BCL2L2	apoptosis regulation	SN-39	LTBR	CD44,IGF2BP1,IRF7,LTB,LTBR,TRAF3,TRAF5	1
ALL	1011	ABT-263	targeted	BCL2, BCL2L1, BCL2L2	apoptosis regulation	SN-40	DNMT3B	DNMT3B,HDAC1,HIF1A,PLIN2,SRXN1,UBA2,UBE2I	1
ALL	1011	ABT-263	targeted	BCL2, BCL2L1, BCL2L2	apoptosis regulation	SN-41	TLN2	ARG2,HIF1A,ITGB2,NOS3,PLIN2,TLN2,VCAM1	1
ALL	1011	ABT-263	targeted	BCL2, BCL2L1, BCL2L2	apoptosis regulation	SN-42	CELSR1	CELSR1,MNX1,NCOA2,PLIN2,RYK,VANGL2,WNT1	1
ALL	1011	ABT-263	targeted	BCL2, BCL2L1, BCL2L2	apoptosis regulation	SN-43	LAG3	ARHGEF12,CD44,CD8A,IGF2BP1,LAG3,NCAM1,VAV1	1
ALL	1011	ABT-263	targeted	BCL2, BCL2L1, BCL2L2	apoptosis regulation	SN-44	CXADR	AMICA1,CD44,CXADR,IGF2BP1,ITGB1,VCAM1,VEGFA	1
ALL	1011	ABT-263	targeted	BCL2, BCL2L1, BCL2L2	apoptosis regulation	SN-45	RYR3	FKBP1A,HIF1A,PLIN2,PSMA8,RYR3,SMAD3,SMURF1	1
ALL	1011	ABT-263	targeted	BCL2, BCL2L1, BCL2L2	apoptosis regulation	SN-46	MYH2	MYH2,NCOA1,PLIN2,RHOA,SLC2A4,SRXN1,STAT6	1
ALL	1011	ABT-263	targeted	BCL2, BCL2L1, BCL2L2	apoptosis regulation	SN-47	CPSF1	CPSF1,CPSF2,PLIN2,PSMA8,PSME1,RBBP6,SMARCD3	1
ALL	1011	ABT-263	targeted	BCL2, BCL2L1, BCL2L2	apoptosis regulation	SN-48	DNAH9	CTNNB1,DNAH9,FOXJ1,IGF2BP1,MED1,PITX2,PLIN2	1
ALL	1012	Vorinostat	targeted	HDAC inhibitor Class I, IIa, IIb, IV	chromain histone acetylation	SN-01	NID2	ACTN4,ITGB1,LGALS1,NID1,NID2,SRGN,ZBTB17	0.65
ALL	1012	Vorinostat	targeted	HDAC inhibitor Class I, IIa, IIb, IV	chromain histone acetylation	SN-02	LTBP1	LGALS1,LTBP1,SRGN,TGFB1,TSPO,UBC,VWF	0.74
ALL	1012	Vorinostat	targeted	HDAC inhibitor Class I, IIa, IIb, IV	chromain histone acetylation	SN-03	EGFR	EGFR,LGALS1,PIK3CG,TNC	0.52
ALL	1012	Vorinostat	targeted	HDAC inhibitor Class I, IIa, IIb, IV	chromain histone acetylation	SN-04	NEB	ACTN2,HRAS,LGALS1,NEB,PLEK,SRGN,TTN	0.52
ALL	1012	Vorinostat	targeted	HDAC inhibitor Class I, IIa, IIb, IV	chromain histone acetylation	SN-05	SIN3B,TP53	LGALS1,MAX,S100A4,SIN3B,TP53	0.7
ALL	1012	Vorinostat	targeted	HDAC inhibitor Class I, IIa, IIb, IV	chromain histone acetylation	SN-06	TRIO	CHRM3,HRAS,LGALS1,PIK3CG,RAC2,TRIO,XCR1	0.74
ALL	1012	Vorinostat	targeted	HDAC inhibitor Class I, IIa, IIb, IV	chromain histone acetylation	SN-07	DNAH6	DCTN1,DNAH6,LGALS1,PAFAH1B1,PLEK,TUBA4A,UBC	0.78
ALL	1012	Vorinostat	targeted	HDAC inhibitor Class I, IIa, IIb, IV	chromain histone acetylation	SN-08	DNAH8	DNAH8,HRAS,INS,LGALS1,MYH14,TPR,TSPO	0.83
ALL	1012	Vorinostat	targeted	HDAC inhibitor Class I, IIa, IIb, IV	chromain histone acetylation	SN-09	CELSR1	CELSR1,LGALS1,MYC,PPARA,RORA,TSPO,VANGL2	0.83
ALL	1012	Vorinostat	targeted	HDAC inhibitor Class I, IIa, IIb, IV	chromain histone acetylation	SN-10	MBD6	CCL5,EXOSC8,IL8,LGALS1,MAX,MBD6,ZFP36L1	0.78
ALL	1012	Vorinostat	targeted	HDAC inhibitor Class I, IIa, IIb, IV	chromain histone acetylation	SN-11	SNX33	DNM2,LGALS1,PIK3CG,SNX33,SNX9,UBC,VAV1	0.83
ALL	1012	Vorinostat	targeted	HDAC inhibitor Class I, IIa, IIb, IV	chromain histone acetylation	SN-12	ABCA7	ABCA7,ALB,APOA1,GEMIN4,LGALS1,SRGN,TGS1	0.78
ALL	1012	Vorinostat	targeted	HDAC inhibitor Class I, IIa, IIb, IV	chromain histone acetylation	SN-13	TRPV3	CCL5,CNR1,LGALS1,TRPM8,TRPV1,TRPV3,ZBTB17	0.74
ALL	1012	Vorinostat	targeted	HDAC inhibitor Class I, IIa, IIb, IV	chromain histone acetylation	SN-14	CXADR	AMICA1,CTNNA1,CXADR,ITGB1,LGALS1,MAX,ZYX	0.78
ALL	1012	Vorinostat	targeted	HDAC inhibitor Class I, IIa, IIb, IV	chromain histone acetylation	SN-15	LAG3	CD8A,LAG3,LGALS1,PTPRC	0.7
ALL	1012	Vorinostat	targeted	HDAC inhibitor Class I, IIa, IIb, IV	chromain histone acetylation	SN-16	RYR1	FKBP1B,HRAS,ITPR1,LGALS1,RYR1,TRPC3,VAV1	0.74
ALL	1012	Vorinostat	targeted	HDAC inhibitor Class I, IIa, IIb, IV	chromain histone acetylation	SN-17	SHANK2	DLG4,HRAS,LGALS1,MYO1F,MYO6,SHANK2,SLC9A3	0.7
ALL	1012	Vorinostat	targeted	HDAC inhibitor Class I, IIa, IIb, IV	chromain histone acetylation	SN-18	RAD54L	GLI3,LGALS1,PARP1,RAD54L,RECQL,SMAD4,UBC	0.74
ALL	1012	Vorinostat	targeted	HDAC inhibitor Class I, IIa, IIb, IV	chromain histone acetylation	SN-19	PRPF8	DDIT4L,GSPT2,LGALS1,PRPF8,SNRPG,UBC,UPF3B	0.74
ALL	1012	Vorinostat	targeted	HDAC inhibitor Class I, IIa, IIb, IV	chromain histone acetylation	SN-20	ALKBH7	ALKBH1,ALKBH7,ALKBH8,LGALS1,TRMT112,UBC,ZNF131	0.7
ALL	1012	Vorinostat	targeted	HDAC inhibitor Class I, IIa, IIb, IV	chromain histone acetylation	SN-21	LTBR	FAT1,LGALS1,LTBR,NFKBIA,TNFSF14,TRAF2,UBC	0.74
ALL	1013	Nilotinib	targeted	ABL	ABL signaling	SN-01	PRPF8	GSPT2,PRPF8,TCEAL4,UBC,UPF3B	0.83
ALL	1013	Nilotinib	targeted	ABL	ABL signaling	SN-02	TP53	TCEAL1,TCEAL4,TP53,TWIST1,USP11	0.78
ALL	1013	Nilotinib	targeted	ABL	ABL signaling	SN-03	SMC4	NGFRAP1,PLK1,SMC4,TCEAL4,TUBG2,UBC,YWHAE	0.65
ALL	1013	Nilotinib	targeted	ABL	ABL signaling	SN-04	NID2	CTSS,HSPG2,NID2	0.65
ALL	1013	Nilotinib	targeted	ABL	ABL signaling	SN-05	TRPV3	IRS1,SRC,TCEAL4,TRPM8,TRPV1,TRPV3,UBC	0.7
ALL	1013	Nilotinib	targeted	ABL	ABL signaling	SN-06	ALKBH7	ALKBH1,ALKBH7,ALKBH8,TCEAL4,TRMT112,UBC,ZNRF3	0.7
ALL	1013	Nilotinib	targeted	ABL	ABL signaling	SN-07	DNMT3B	CHN1,DNMT3B,EZH2,TCEAL4,UBC,UHRF2,VAV1	0.74
ALL	1013	Nilotinib	targeted	ABL	ABL signaling	SN-08	SNX33	DNM1,SNX30,SNX33,SNX9,TCEAL4,TNK2,UBC	0.65
ALL	1013	Nilotinib	targeted	ABL	ABL signaling	SN-09	ABCA7	ABCA7,APOA1,MIS12,SNCA,TCEAL4,TTR,UBC	0.65
ALL	1013	Nilotinib	targeted	ABL	ABL signaling	SN-10	HMCN1	ARMS2,HMCN1,RHOA,SIRPG,TCEAL4,UBC,VEGFA	0.7
ALL	1013	Nilotinib	targeted	ABL	ABL signaling	SN-11	NID2,TP53	MMP9,NID1,NID2,TCEAL4,TP53,TXLNG,UBC	0.7
ALL	1013	Nilotinib	targeted	ABL	ABL signaling	SN-12	MUC4	ERBB2,MUC4,PIK3CG,PTPRK,ST6GALNAC4,TCEAL4,UBC	0.74
ALL	1013	Nilotinib	targeted	ABL	ABL signaling	SN-13	LHX5	DVL3,LHX5,NKD2,SFRP5,TCEAL4,UBC,WNT8B	0.7
ALL	1013	Nilotinib	targeted	ABL	ABL signaling	SN-14	OBSCN	CDC42,DOCK10,OBSCN,RAC3,TCEAL4,TRIP10,UBC	0.7
ALL	1013	Nilotinib	targeted	ABL	ABL signaling	SN-15	LAG3	CD8A,ITGAL,LAG3,SELL	0.61
ALL	1013	Nilotinib	targeted	ABL	ABL signaling	SN-16	CXADR	AMICA1,CXADR,ITGB1,PRKACB,TCEAL4,UBC,UTRN	0.65
ALL	1013	Nilotinib	targeted	ABL	ABL signaling	SN-17	DUOX2	DECR1,DUOX2,PRKCB,SELL,TCEAL4,TNF,UBC	0.7
ALL	1013	Nilotinib	targeted	ABL	ABL signaling	SN-18	FBN2	FBN2,GRIP1,MEF2C,MFAP2,NOTCH1,TCEAL4,UBC	0.7
ALL	1013	Nilotinib	targeted	ABL	ABL signaling	SN-19	ZNF423	EBF1,KLF5,TCEAL4,TGFB1,TGFBR2,UBC,ZNF423	0.7
ALL	1013	Nilotinib	targeted	ABL	ABL signaling	SN-20	CELSR1	ADAR,CELSR1,GSPT2,IFI35,IFITM2,UPF1,VANGL2	0.7
ALL	1016	Temsirolimus	targeted	MTOR	TOR signaling	SN-01	EGFR	EGFR,FYN,SH2D1A,SKAP1,STAT5A	0.87
ALL	1016	Temsirolimus	targeted	MTOR	TOR signaling	SN-02	CDC42BPA	CDC42,CDC42BPA,FYB,GRAP2,SKAP1	0.78
ALL	1016	Temsirolimus	targeted	MTOR	TOR signaling	SN-03	KALRN	KALRN,LCK,P2RY10,SKAP1,VAV1	0.87
ALL	1016	Temsirolimus	targeted	MTOR	TOR signaling	SN-04	HERC1	DTX1,HERC1,TSC22D3,UBC	0.83
ALL	1016	Temsirolimus	targeted	MTOR	TOR signaling	SN-05	LTBR	FYB,LAT,LTBR,SKAP1,TRAF3,TRAF5,UBC	0.78
ALL	1016	Temsirolimus	targeted	MTOR	TOR signaling	SN-06	LAG3	CD28,CD8A,LAG3,LCP2,SKAP1	0.78
ALL	1016	Temsirolimus	targeted	MTOR	TOR signaling	SN-07	DUOX2	DECR1,DUOX2,FYB,PRKCQ,SKAP1,VCAM1,ZAP70	0.74
ALL	1016	Temsirolimus	targeted	MTOR	TOR signaling	SN-08	TP53	SH2D1A,TP53,USP20,VHL	0.74
ALL	1016	Temsirolimus	targeted	MTOR	TOR signaling	SN-09	CELSR1	CD247,CELSR1,FZD6,GNG2,PTPRC,SKAP1	0.78
ALL	1016	Temsirolimus	targeted	MTOR	TOR signaling	SN-10	SIN3B,TP53	LCK,NR2F2,SH2D1A,SIN3B,SKAP1,TERT,TP53	0.78
ALL	1016	Temsirolimus	targeted	MTOR	TOR signaling	SN-11	CRTC1	CRTC1,FOS,TRIP6,TSC22D3	0.78
ALL	1016	Temsirolimus	targeted	MTOR	TOR signaling	SN-12	TLN2	BIN2,ITGB1,LPXN,PRKAR2A,RAB32,TLN2,VCL	0.83
ALL	1016	Temsirolimus	targeted	MTOR	TOR signaling	SN-13	PYGM	GALM,GALT,PGM1,PYGM	0.87
ALL	1016	Temsirolimus	targeted	MTOR	TOR signaling	SN-14	DNAH6,DNAH8	DNAH6,DNAH8,FYB,SKAP1,TES,VASP,WDTC1	0.83
ALL	1016	Temsirolimus	targeted	MTOR	TOR signaling	SN-15	SRRM2	IFNGR2,IRS2,JAK1,MAGOH,SRRM2	0.83
ALL	1016	Temsirolimus	targeted	MTOR	TOR signaling	SN-16	RYR3,TP53	BIN2,FKBP1A,PPP3CB,RYR3,SH2D1A,TP53,YY1	0.87
ALL	1016	Temsirolimus	targeted	MTOR	TOR signaling	SN-17	ZNF423	BLNK,EBF1,SPI1,ZNF423	0.83
ALL	1016	Temsirolimus	targeted	MTOR	TOR signaling	SN-18	TRPV3	LCK,PRKCE,PRKCH,SKAP1,TRPM8,TRPV1,TRPV3	0.83
ALL	1016	Temsirolimus	targeted	MTOR	TOR signaling	SN-19	MYCBP2	BIN2,GALM,GCK,HNRNPK,MYCBP2,RAE1,UPF3B	0.83
ALL	1016	Temsirolimus	targeted	MTOR	TOR signaling	SN-20	MBD6	AKT1,C1D,EXOSC8,LCK,MBD6,SKAP1,ZFP36L1	0.83
ALL	1016	Temsirolimus	targeted	MTOR	TOR signaling	SN-21	PCNT,TP53	CDK1,PCNT,PRKAR2A,RAB32,SH2D1A,TP53,YWHAG	0.87
ALL	1016	Temsirolimus	targeted	MTOR	TOR signaling	SN-22	ABCA7	ABCA7,APOA1,CALR,P2RY10,SAA1	0.87
ALL	1016	Temsirolimus	targeted	MTOR	TOR signaling	SN-23	CXADR	AMICA1,CXADR,ITGA4,ITGB1,PTK2,PTPRC,SKAP1	0.87
ALL	1016	Temsirolimus	targeted	MTOR	TOR signaling	SN-24	NEB	MYLK,NEB,TPM4,TRIP6	0.83
ALL	1016	Temsirolimus	targeted	MTOR	TOR signaling	SN-25	OBSCN	ENAH,FYB,OBSCN,RHOF,ROCK1,SKAP1,TRIP10	0.87
ALL	1016	Temsirolimus	targeted	MTOR	TOR signaling	SN-26	LHX5	LCK,LHX5,SFRP5,SKAP1,WNT5A,WNT8B,YES1	0.87
ALL	1016	Temsirolimus	targeted	MTOR	TOR signaling	SN-27	SNX33	BIN2,DNM1,FYN,SH2D1A,SNX33,SNX9,WASL	0.87
ALL	1016	Temsirolimus	targeted	MTOR	TOR signaling	SN-28	RYR1	HOMER3,IKBKB,IL6,PTPRC,RYR1,SKAP1,UBB	0.83
ALL	1016	Temsirolimus	targeted	MTOR	TOR signaling	SN-29	LHX5,TP53	HHIP,LHX5,SFRP5,SH2D1A,SHH,TP53,WNT5B	0.87
ALL	1016	Temsirolimus	targeted	MTOR	TOR signaling	SN-30	SMC4	CCNB1,LCK,SKAP1,SMC4,STAT5A,TSC22D3,UBC	0.87
ALL	1016	Temsirolimus	targeted	MTOR	TOR signaling	SN-31	RYR3	CTGF,FKBP1A,ITGAM,PTPRC,RYR3,SKAP1,TGFBR3	0.83
ALL	1016	Temsirolimus	targeted	MTOR	TOR signaling	SN-32	HMCN1	CD47,FYB,HMCN1,SIRPG,SKAP1,SKAP2,VEGFA	0.83
ALL	1016	Temsirolimus	targeted	MTOR	TOR signaling	SN-33	ALKBH7	ALKBH1,ALKBH7,ALKBH8,TRMT112,TSC22D3,UBC,ZNRF3	0.87
ALL	1016	Temsirolimus	targeted	MTOR	TOR signaling	SN-34	SHANK2	BIN1,BIN2,BLNK,DNM2,SHANK2,VAV1	0.83
ALL	1016	Temsirolimus	targeted	MTOR	TOR signaling	SN-35	LTBP1,TP53	EBF1,LTBP1,S1PR1,SH2D1A,TGFB1,TP53,VEGFA	0.87
ALL	1016	Temsirolimus	targeted	MTOR	TOR signaling	SN-36	PFKFB2	AKT1,GALM,HK1,IRS2,PFKFB2	0.83
ALL	1016	Temsirolimus	targeted	MTOR	TOR signaling	SN-37	MBD6,TP53	EXOSC8,IRS2,MAPK3,MBD6,SH2D1A,TP53,ZFP36	0.83
ALL	1016	Temsirolimus	targeted	MTOR	TOR signaling	SN-38	ZNF423	EBF1,GATA3,LCK,SKAP1,TCF3,WNT10B,ZNF423	0.87
ALL	1016	Temsirolimus	targeted	MTOR	TOR signaling	SN-39	SRRM2	BLNK,GRB2,HNRNPC,SF3A2,SKAP1,SRRM2	0.87
ALL	1016	Temsirolimus	targeted	MTOR	TOR signaling	SN-40	DNAH9	DNAH9,DYNLL1,IRS2,LCP2,PAK1,SKAP1,YWHAE	0.87
ALL	1016	Temsirolimus	targeted	MTOR	TOR signaling	SN-41	USH2A	AKAP9,IRS2,NINL,PRKAR2A,RAB32,USH2A,YWHAE	0.87
ALL	1016	Temsirolimus	targeted	MTOR	TOR signaling	SN-42	RAD54L,TP53	RAD51,RAD54L,RECQL,SH2D1A,SUMO1,TP53,TSC22D3	0.87
ALL	1016	Temsirolimus	targeted	MTOR	TOR signaling	SN-43	CELSR1	CELSR1,GRB2,IRS2,MAPK9,ROR2,SKAP1,VANGL2	0.87
ALL	1017	Olaparib	targeted	PARP1, PARP2	Genome integrity	SN-01	EGFR	DNTT,EGFR,MYC,PAG1	0.96
ALL	1017	Olaparib	targeted	PARP1, PARP2	Genome integrity	SN-02	KALRN	DNTT,KALRN,LPAR6,UBC,VAV1	0.91
ALL	1017	Olaparib	targeted	PARP1, PARP2	Genome integrity	SN-03	LTBR	DNTT,LTBR,PAG1,PTPN11,TNFRSF14,TNFSF14,UBC	0.91
ALL	1017	Olaparib	targeted	PARP1, PARP2	Genome integrity	SN-04	SHANK2	DNM2,DNTT,PAG1,PDGFB,SHANK2,VAV1,XRCC6	0.91
ALL	1017	Olaparib	targeted	PARP1, PARP2	Genome integrity	SN-05	ARID1A,TP53	ARID1A,DNTT,GATA1,LMO2,MYC,SMARCA4,TP53	0.91
ALL	1017	Olaparib	targeted	PARP1, PARP2	Genome integrity	SN-06	RAD54L	DNTT,RAD54L,RECQL,XRCC5	0.91
ALL	1017	Olaparib	targeted	PARP1, PARP2	Genome integrity	SN-07	SIN3B	DNTT,MAX,MEF2C,SIN3B,SMAD2	0.87
ALL	1017	Olaparib	targeted	PARP1, PARP2	Genome integrity	SN-08	NID2	DNTT,HSPG2,ITGB1,MYC,NID2,TAPBPL,VWA1	0.91
ALL	1017	Olaparib	targeted	PARP1, PARP2	Genome integrity	SN-09	FBN2	DNTT,FBN2,LMO2,MFAP2,NOTCH1,TCF3,UBC	0.87
ALL	1017	Olaparib	targeted	PARP1, PARP2	Genome integrity	SN-10	DNAH6	DCTN1,DNAH6,DNTT,GRB2,PAFAH1B1,SHANK3,UBC	0.87
ALL	1017	Olaparib	targeted	PARP1, PARP2	Genome integrity	SN-11	DUOX2	DECR1,DNTT,DUOX2,IL1B,PRKCB,UBC,VCAM1	0.87
ALL	1017	Olaparib	targeted	PARP1, PARP2	Genome integrity	SN-12	SRRM2	CDC5L,DNTT,PRPF19,SRRM2	0.87
ALL	1017	Olaparib	targeted	PARP1, PARP2	Genome integrity	SN-13	ABCA7	ABCA7,APOA1,DNTT,MYC,PPARA,TGS1,TIAM2	0.87
ALL	1017	Olaparib	targeted	PARP1, PARP2	Genome integrity	SN-14	ZNF423	CDKN2D,CEBPB,DNTT,EBF1,PRKDC,ZNF423	0.87
ALL	1017	Olaparib	targeted	PARP1, PARP2	Genome integrity	SN-15	HMCN1	CD34,DNTT,HMCN1,SIRPG,VEGFA	0.91
ALL	1017	Olaparib	targeted	PARP1, PARP2	Genome integrity	SN-16	MBD6	DNTT,EXOSC8,IL1B,IL8,MBD6,MYC,ZFP36L1	0.91
ALL	1017	Olaparib	targeted	PARP1, PARP2	Genome integrity	SN-17	CDK12	CCNT1,CDK12,DNTT,MYC,SOCS6,SUPT5H,TCEB2	0.91
ALL	1017	Olaparib	targeted	PARP1, PARP2	Genome integrity	SN-18	TRPV3	DNTT,MYC,SRC,TRPM8,TRPV1,TRPV3,USP10	0.91
ALL	1017	Olaparib	targeted	PARP1, PARP2	Genome integrity	SN-19	ALKBH7	ALKBH1,ALKBH3,ALKBH7,ALKBH8,DNTT,TRMT112,UBC	0.91
ALL	1017	Olaparib	targeted	PARP1, PARP2	Genome integrity	SN-20	USH2A	DNTT,HSP90AA1,MYC,NINL,TBC1D4,USH2A,YWHAG	0.91
ALL	1017	Olaparib	targeted	PARP1, PARP2	Genome integrity	SN-21	PRPF8	CASP4,DNTT,GSPT2,PRPF8,PTBP1,UBC,UPF3B	0.91
ALL	1017	Olaparib	targeted	PARP1, PARP2	Genome integrity	SN-22	RYR3	ACVR1,BAMBI,CDK9,DNTT,FKBP1B,MYC,RYR3	0.91
ALL	1017	Olaparib	targeted	PARP1, PARP2	Genome integrity	SN-23	CELSR1	BAMBI,CELSR1,DNTT,DVL2,MAGI3,UBC,VANGL2	0.91
ALL	1018	ABT-888	targeted	PARP1, PARP2	Genome integrity	SN-01	TRIO	FYN,GPR65,GZMA,LPAR6,PAG1,TRIO,XCR1	0.74
ALL	1018	ABT-888	targeted	PARP1, PARP2	Genome integrity	SN-02	TP53	CSK,PAG1,PTK2,TP53,XAF1	0.83
ALL	1018	ABT-888	targeted	PARP1, PARP2	Genome integrity	SN-03	EGFR	CTSG,EGFR,PAG1,PLAUR	0.78
ALL	1018	ABT-888	targeted	PARP1, PARP2	Genome integrity	SN-04	ESPL1	CD2,CD48,ESPL1,SH3KBP1,UBB	0.87
ALL	1018	ABT-888	targeted	PARP1, PARP2	Genome integrity	SN-05	ARID1A	ARID1A,IRS1,JUN,TGIF1	0.91
ALL	1018	ABT-888	targeted	PARP1, PARP2	Genome integrity	SN-06	PRPF8	APEX1,CD2,CD2BP2,CD48,GZMA,PRPF8,YBX1	0.91
ALL	1018	ABT-888	targeted	PARP1, PARP2	Genome integrity	SN-07	TP53	KRAS,SMAD4,TGIF1,TP53	0.91
ALL	1018	ABT-888	targeted	PARP1, PARP2	Genome integrity	SN-08	SMC4	SIN3A,SMC4,TBL1X,TGIF1,UBC	0.96
ALL	1018	ABT-888	targeted	PARP1, PARP2	Genome integrity	SN-09	CXADR	AMICA1,CSK,CTSG,CXADR,ITGB1,PAG1,THBS1	0.96
ALL	1018	ABT-888	targeted	PARP1, PARP2	Genome integrity	SN-10	NID2	CTSG,GZMA,ITGA3,NID1,NID2,PLAUR,TYK2	0.96
ALL	1018	ABT-888	targeted	PARP1, PARP2	Genome integrity	SN-11	NEB	NEB,PAG1,PXN,TPM4	0.91
ALL	1018	ABT-888	targeted	PARP1, PARP2	Genome integrity	SN-12	LAG3	CD2,CD48,CD8A,LAG3,PAG1,SYK,VAV1	0.96
ALL	1018	ABT-888	targeted	PARP1, PARP2	Genome integrity	SN-13	HMCN1	CSK,HMCN1,PAG1,RAP1GAP,SIRPG,VWF,YWHAZ	0.91
ALL	1018	ABT-888	targeted	PARP1, PARP2	Genome integrity	SN-14	DUOX2	AGT,CTSG,DECR1,DUOX2,PAG1,PXN,VCAM1	0.91
ALL	1018	ABT-888	targeted	PARP1, PARP2	Genome integrity	SN-15	SNX33	BIN1,DNM2,PAG1,PDGFB,SNX33,SNX9,VAV1	0.91
ALL	1018	ABT-888	targeted	PARP1, PARP2	Genome integrity	SN-16	DNAH9	DNAH9,DYNLL1,DYNLT3,TBL1X,TUBGCP3	0.91
ALL	1018	ABT-888	targeted	PARP1, PARP2	Genome integrity	SN-17	SHANK2	CTSG,DLG4,DNM2,F2R,FYN,PAG1,SHANK2	0.96
ALL	1018	ABT-888	targeted	PARP1, PARP2	Genome integrity	SN-18	NID2	B2M,HSPG2,MT2A,NID2,PAG1	0.96
ALL	1018	ABT-888	targeted	PARP1, PARP2	Genome integrity	SN-19	CELSR1	CELSR1,FZD6,GNG2,LPAR6	0.91
ALL	1018	ABT-888	targeted	PARP1, PARP2	Genome integrity	SN-20	TRPV3	CTSG,GPR65,MMP1,TAC1,TRPM8,TRPV1,TRPV3	0.91
ALL	1018	ABT-888	targeted	PARP1, PARP2	Genome integrity	SN-21	LTBR	GZMA,LTBR,MAPK14,PAG1,PTPN11,TRAF2,TRAF3	0.91
ALL	1018	ABT-888	targeted	PARP1, PARP2	Genome integrity	SN-22	ERCC6	ERCC6,HDAC2,RCOR1,TGIF1	0.91
ALL	1018	ABT-888	targeted	PARP1, PARP2	Genome integrity	SN-23	RYR3	FKBP1A,PRKCZ,RYR3,SMAD3,TGIF1	0.91
ALL	1018	ABT-888	targeted	PARP1, PARP2	Genome integrity	SN-24	MBD6	EXOSC8,IRS1,MAPK3,MBD6,SMAD3,TGIF1,ZFP36	0.96
ALL	1018	ABT-888	targeted	PARP1, PARP2	Genome integrity	SN-25	CELSR1	CELSR1,CTSG,DVL2,PLAUR,SCRIB,SRC,VANGL2	0.91
ALL	1018	ABT-888	targeted	PARP1, PARP2	Genome integrity	SN-26	ZNF423	EBF1,MED19,SMAD4,TBL1X,TGFB1,TGIF1,ZNF423	0.91
ALL	1018	ABT-888	targeted	PARP1, PARP2	Genome integrity	SN-27	ALKBH7	ALKBH1,ALKBH7,ALKBH8,SMAD4,TGIF1,TRMT112,UBC	0.91
ALL	1018	ABT-888	targeted	PARP1, PARP2	Genome integrity	SN-28	KALRN	AGT,CTSG,KALRN,LPAR6,TBL1X,VAV1,XCR1	0.91
ALL	1018	ABT-888	targeted	PARP1, PARP2	Genome integrity	SN-29	MYCBP2	HDAC1,MYCBP2,RAE1,RANBP2,TBL1X,TGIF1,UPF3B	0.91
ALL	1018	ABT-888	targeted	PARP1, PARP2	Genome integrity	SN-30	CDC42BPA	CDC42,CDC42BPA,FYN,KRAS,PAG1,TIAM2,YES1	0.91
ALL	1018	ABT-888	targeted	PARP1, PARP2	Genome integrity	SN-31	OBSCN	CSK,OBSCN,PAG1,RHOA,TBL1X,TIAM2,TRIP10	0.91
ALL	1018	ABT-888	targeted	PARP1, PARP2	Genome integrity	SN-32	CRTC1	CRTC1,CTSG,IRS1,JUN,MMP1,PAG1,PTPN11	0.91
ALL	1018	ABT-888	targeted	PARP1, PARP2	Genome integrity	SN-33	MUC4	GALNT6,LCK,MUC1,MUC4,PAG1	0.91
ALL	1018	ABT-888	targeted	PARP1, PARP2	Genome integrity	SN-34	LHX5	ATP6AP2,CTSG,LHX5,SFRP5,WNT3A	0.87
ALL	1018	ABT-888	targeted	PARP1, PARP2	Genome integrity	SN-35	DNAH9	DNAH9,FOXJ1,MED1,PITX2,TBL1X,TGIF1,WWTR1	0.83
ALL	1018	ABT-888	targeted	PARP1, PARP2	Genome integrity	SN-36	DNAH6	CD2,CD48,DCTN2,DNAH6,PAFAH1B1,PRKAR2B,TBL1X	0.91
ALL	1018	ABT-888	targeted	PARP1, PARP2	Genome integrity	SN-37	RAD54L	BNIP3,HIF1A,RAD52,RAD54L,TBL1X,TERT	0.91
ALL	1018	ABT-888	targeted	PARP1, PARP2	Genome integrity	SN-38	MUC4	CTSG,EP300,GALNT6,MMP1,MUC2,MUC4,TBL1X	0.91
ALL	1018	ABT-888	targeted	PARP1, PARP2	Genome integrity	SN-39	ABCA7	ABCA7,APOA1,FYN,LRP8,PAG1,SRA1,TBL1X	0.91
ALL	1018	ABT-888	targeted	PARP1, PARP2	Genome integrity	SN-40	PCNT	CSK,PAG1,PCNT,PRKAR2B,TGIF1,WWTR1,YWHAE	0.91
ALL	1018	ABT-888	targeted	PARP1, PARP2	Genome integrity	SN-41	USH2A	FYN,HSP90AA1,IRS1,NINL,PAG1,USH2A,YWHAE	0.87
ALL	1018	ABT-888	targeted	PARP1, PARP2	Genome integrity	SN-42	PYGM	AGL,ARNT,BNIP3,PGM1,PYGM,SMAD4,TGIF1	0.87
ALL	1018	ABT-888	targeted	PARP1, PARP2	Genome integrity	SN-43	DNAH6	CTSG,DNAH1,DNAH6,DYNLT3,PAFAH1B1,PLAUR,VLDLR	0.91
ALL	1018	ABT-888	targeted	PARP1, PARP2	Genome integrity	SN-44	EGFR,LHX5	EGFR,LHX5,NOTCH1,PAG1,SFRP5,TBL1X,WNT5A	0.91
ALL	1018	ABT-888	targeted	PARP1, PARP2	Genome integrity	SN-45	FBN2	CTSG,FBN2,JUN,MFAP2,NOTCH1,PLAUR,TGIF1	0.87
ALL	1018	ABT-888	targeted	PARP1, PARP2	Genome integrity	SN-46	TRPV3	BCL2,BNIP3,CDK1,TBL1X,TRPM8,TRPV3,USP10	0.87
ALL	1018	ABT-888	targeted	PARP1, PARP2	Genome integrity	SN-47	COL14A1	COL14A1,COL18A1,CTSG,MMP9,SMAD4,TGIF1,THBS1	0.87
ALL	1018	ABT-888	targeted	PARP1, PARP2	Genome integrity	SN-48	NID2	LAMC1,NID1,NID2,PAG1,PXN,SMAD4,TGIF1	0.87
ALL	1018	ABT-888	targeted	PARP1, PARP2	Genome integrity	SN-49	BCL11B	BCL11B,CD2,CD48,HDAC1,LCK,NOTCH1,TGIF1	0.91
ALL	1019	Bosutinib	targeted	SRC, ABL, TEC	ABL signaling	SN-01	LAG3	CCR7,CD8A,LAG3,LCP2,SKAP1	0.7
ALL	1019	Bosutinib	targeted	SRC, ABL, TEC	ABL signaling	SN-02	TP53	S100A4,S100A6,TP53	0.78
ALL	1019	Bosutinib	targeted	SRC, ABL, TEC	ABL signaling	SN-03	EGFR	CTNNB1,EGFR,ENAH,TLE1	0.87
ALL	1019	Bosutinib	targeted	SRC, ABL, TEC	ABL signaling	SN-04	PFKFB2	AKT1,PFKFB2,PFKP,RETN,S100A11,UBC	0.83
ALL	1019	Bosutinib	targeted	SRC, ABL, TEC	ABL signaling	SN-05	SIN3B	BCL11A,HDAC1,SIN3B,TLE1	0.87
ALL	1019	Bosutinib	targeted	SRC, ABL, TEC	ABL signaling	SN-06	DNAH9	DNAH9,DYNLL1,LCP2,PAK1,S100A11,SKAP1,UBC	0.87
ALL	1019	Bosutinib	targeted	SRC, ABL, TEC	ABL signaling	SN-07	SMC4	DNTT,SMC4,UBC,VPS37B	0.87
ALL	1019	Bosutinib	targeted	SRC, ABL, TEC	ABL signaling	SN-08	LRP1	ITGAM,LRP1,PTPRC,SELPLG,SKAP1	0.78
ALL	1019	Bosutinib	targeted	SRC, ABL, TEC	ABL signaling	SN-09	ZNF423	BCL11A,EBF1,NR2F2,ZNF423	0.78
ALL	1019	Bosutinib	targeted	SRC, ABL, TEC	ABL signaling	SN-10	MYCBP2	BCL11A,HDAC1,MYCBP2,RAE1,RAN,UBC,VPS37B	0.87
ALL	1019	Bosutinib	targeted	SRC, ABL, TEC	ABL signaling	SN-11	COL14A1	BATF,COL14A1,JUND,MMP9	0.87
ALL	1019	Bosutinib	targeted	SRC, ABL, TEC	ABL signaling	SN-12	OBSCN	CDC42,ENAH,OBSCN,UBA52,VPS37B	0.87
ALL	1019	Bosutinib	targeted	SRC, ABL, TEC	ABL signaling	SN-13	RYR3	FKBP1A,GATA3,RYR3,S100A11,SMAD7,UBC,YY1	0.83
ALL	1019	Bosutinib	targeted	SRC, ABL, TEC	ABL signaling	SN-14	KALRN	ANXA1,KALRN,P2RY10,S100A11	0.91
ALL	1019	Bosutinib	targeted	SRC, ABL, TEC	ABL signaling	SN-15	ABCA7	ABCA7,APOA1,LDLR,TBL1XR1,TLE1,UBC,VPS37B	0.91
ALL	1019	Bosutinib	targeted	SRC, ABL, TEC	ABL signaling	SN-16	CRTC1	BATF,CRTC1,FOS,JUND,MMP1,S100A11,UBC	0.87
ALL	1019	Bosutinib	targeted	SRC, ABL, TEC	ABL signaling	SN-17	SRRM2	MAGOH,RPS27A,SRRM2,VPS37B	0.87
ALL	1019	Bosutinib	targeted	SRC, ABL, TEC	ABL signaling	SN-18	MBD6	DNTT,EXOSC8,MBD6,MYC,TLE1,ZFP36L1	0.91
ALL	1019	Bosutinib	targeted	SRC, ABL, TEC	ABL signaling	SN-19	TLN2	ITGAL,ITGB2,SELPLG,TLN2	0.91
ALL	1019	Bosutinib	targeted	SRC, ABL, TEC	ABL signaling	SN-20	DUOX2	ANXA1,DECR1,DUOX2,EDN1,RETN,S100A11,TNF	0.87
ALL	1019	Bosutinib	targeted	SRC, ABL, TEC	ABL signaling	SN-21	USH2A	NINL,USH2A,VPS37B,XPO1,YWHAE	0.87
ALL	1019	Bosutinib	targeted	SRC, ABL, TEC	ABL signaling	SN-22	LHX5	LHX5,LRP6,SFRP5,UBB,VPS37B,WNT8A	0.87
ALL	1019	Bosutinib	targeted	SRC, ABL, TEC	ABL signaling	SN-23	NID2	ENAH,ITGB1,NID1,NID2,UBC,VPS37B,ZYX	0.87
ALL	1019	Bosutinib	targeted	SRC, ABL, TEC	ABL signaling	SN-24	TRPV3	CHRM3,P2RY10,TAC1,TRPM8,TRPV1,TRPV3	0.87
ALL	1019	Bosutinib	targeted	SRC, ABL, TEC	ABL signaling	SN-25	ALKBH7	ALKBH1,ALKBH7,ALKBH8,S100A11,TRMT11,TRMT112,UBC	0.87
ALL	1019	Bosutinib	targeted	SRC, ABL, TEC	ABL signaling	SN-26	HERC1,TP53	HERC1,S100A11,S100A4,TP53,UBB,UBC,VPS37B	0.87
ALL	1019	Bosutinib	targeted	SRC, ABL, TEC	ABL signaling	SN-27	DUOX2	DECR1,DUOX2,ENAH,LCP2,RAC1,SKAP1,VCAM1	0.87
ALL	1019	Bosutinib	targeted	SRC, ABL, TEC	ABL signaling	SN-28	ZNF423	CTNNB1,EBF1,ENAH,GATA3,TGFB1,WNT1,ZNF423	0.87
ALL	1019	Bosutinib	targeted	SRC, ABL, TEC	ABL signaling	SN-29	PCNT	HSP90AA1,NCL,PCNT,S100A11,TTC28	0.87
ALL	1019	Bosutinib	targeted	SRC, ABL, TEC	ABL signaling	SN-30	LRP1	ENAH,GPC1,LRP1,RETN,SERPINE1,TES	0.83
ALL	1019	Bosutinib	targeted	SRC, ABL, TEC	ABL signaling	SN-31	DNAH8	DCTN1,DNAH8,ENAH,S100A11,UBC,VASP,WDTC1	0.83
ALL	1019	Bosutinib	targeted	SRC, ABL, TEC	ABL signaling	SN-32	HMCN1	ENAH,FYB,HMCN1,SIRPA,SIRPG,SKAP1,TES	0.83
ALL	1019	Bosutinib	targeted	SRC, ABL, TEC	ABL signaling	SN-33	DNAH9	CDH1,DNAH9,DYNLL2,ENAH,RAB7A,S100A4	0.83
ALL	1019	Bosutinib	targeted	SRC, ABL, TEC	ABL signaling	SN-34	BCL11B	BCL11B,GATA3,NOTCH1,TLE1	0.83
ALL	1019	Bosutinib	targeted	SRC, ABL, TEC	ABL signaling	SN-35	HMCN1	ERBB4,HMCN1,NOTCH1,S100A11,SIRPG,TLE1,UBC	0.83
ALL	1019	Bosutinib	targeted	SRC, ABL, TEC	ABL signaling	SN-36	SHANK2	DLG4,ENAH,FYN,ROCK1,SHANK2,SKAP1,SLC9A3	0.83
ALL	1019	Bosutinib	targeted	SRC, ABL, TEC	ABL signaling	SN-37	USH2A	NDFIP2,NEDD4L,TAX1BP3,UBE2D2,USH1C,USH2A,VPS37B	0.83
ALL	1019	Bosutinib	targeted	SRC, ABL, TEC	ABL signaling	SN-38	RYR1	HOMER3,IKBKB,RPS6KA1,RYR1,TNFSF10,UBB,VPS37B	0.83
ALL	1019	Bosutinib	targeted	SRC, ABL, TEC	ABL signaling	SN-39	MUC4	GRB2,MUC20,MUC4,SKAP1,ST3GAL4,TSG101,VPS37B	0.83
ALL	1019	Bosutinib	targeted	SRC, ABL, TEC	ABL signaling	SN-40	LTBP1	ANXA1,LTBP1,PPBP,S100A11,TGFB1,VPS37B,XPO1	0.83
ALL	1019	Bosutinib	targeted	SRC, ABL, TEC	ABL signaling	SN-41	LTBR	LCP2,LTBR,PTPN11,SKAP1,TRAF3,UBA52,VPS37B	0.83
ALL	1020	Lenalidomide	targeted	TNFA	other	SN-01	DNMT3B	DNMT3B,SAP18,TGIF1	0.83
ALL	1020	Lenalidomide	targeted	TNFA	other	SN-02	TP53	SMAD1,SMAD4,TGIF1,TP53	0.61
ALL	1020	Lenalidomide	targeted	TNFA	other	SN-03	SMC4	CTBP2,SMC4,TGIF1,UBASH3B,UBC	0.83
ALL	1020	Lenalidomide	targeted	TNFA	other	SN-04	OBSCN	ACTN1,OBSCN,SERPINE1,TGIF1,TTN,VEGFB	0.83
ALL	1020	Lenalidomide	targeted	TNFA	other	SN-05	CPSF1	CPSF1,CTPS2,HDAC1,POLR2K,SRRM1,TGIF1	0.87
ALL	1020	Lenalidomide	targeted	TNFA	other	SN-06	TRIO	GPR65,PIP5K1C,PTPRM,RGS2,TRIO,WASL	0.83
ALL	1020	Lenalidomide	targeted	TNFA	other	SN-07	COL14A1	COL14A1,CTNNB1,MMP9,PTPRM	0.91
ALL	1020	Lenalidomide	targeted	TNFA	other	SN-08	NID2	MMP1,MMP9,NID1,NID2,PRKCZ,SMAD4,TGIF1	0.87
ALL	1020	Lenalidomide	targeted	TNFA	other	SN-09	DNAH6	ANXA5,CTNND1,DCTN1,DNAH6,GJA1,PTPRM,UBC	0.91
ALL	1020	Lenalidomide	targeted	TNFA	other	SN-10	ALKBH7	ALKBH1,ALKBH7,ALKBH8,SMAD1,TRMT112,UBASH3B,UBC	0.91
ALL	1020	Lenalidomide	targeted	TNFA	other	SN-11	ARID1A	ARID1A,JUN,TGIF1,TRIP6	0.87
ALL	1020	Lenalidomide	targeted	TNFA	other	SN-12	RYR3	FKBP1A,MTOR,RYR3,SMAD4,TGIF1,UBASH3B,YY1	0.83
ALL	1020	Lenalidomide	targeted	TNFA	other	SN-13	ZNF423	CTBP2,EBF1,EP300,SMAD1,TGFB1,TGIF1,ZNF423	0.83
ALL	1020	Lenalidomide	targeted	TNFA	other	SN-14	EGFR,TRPV3	EGFR,JUN,TGIF1,TRPM8,TRPV1,TRPV3,UBASH3B	0.83
ALL	1020	Lenalidomide	targeted	TNFA	other	SN-15	LTBP1	CBL,FN1,LTBP1,SERPINE1,TGIF1,UBASH3B,YWHAZ	0.87
ALL	1020	Lenalidomide	targeted	TNFA	other	SN-16	LHX5	GSK3B,LHX5,PRKCZ,SFRP5,SMAD3,TGIF1,WNT8B	0.87
ALL	1020	Lenalidomide	targeted	TNFA	other	SN-17	DUOX2	DECR1,DUOX2,GZMA,MAPK14,PIP5K1C,PTPRM,RAC1	0.83
ALL	1020	Lenalidomide	targeted	TNFA	other	SN-18	DNAH8	CTNND1,DNAH8,DYNC1H1,PTPRM,TUBB2A,VASP,WDTC1	0.83
ALL	1020	Lenalidomide	targeted	TNFA	other	SN-19	CXADR	AMICA1,CXADR,ITGA4,KLK3,SRC,TGIF1,TRIP6	0.87
ALL	1020	Lenalidomide	targeted	TNFA	other	SN-20	KALRN	ANXA5,GPR65,KALRN,UBASH3B,UBC,VAV1,XCR1	0.87
ALL	1020	Lenalidomide	targeted	TNFA	other	SN-21	PYGM	AKT1,CTNNB1,PFKM,PTPRM,PYGM,UBASH3B,UBC	0.91
ALL	1020	Lenalidomide	targeted	TNFA	other	SN-22	SHANK2,SNX33	CTNND1,DNM2,PTPRM,SHANK2,SNX30,SNX33,SNX9	0.91
ALL	1020	Lenalidomide	targeted	TNFA	other	SN-23	USH2A	CEP70,NINL,USH2A	0.87
ALL	1020	Lenalidomide	targeted	TNFA	other	SN-24	PFKFB2	AKT1,ANXA5,PFKFB2,SMAD3,TGIF1,TRIB3,UBC	0.87
ALL	1020	Lenalidomide	targeted	TNFA	other	SN-25	RAD54L	CTBP1,CTNNB1,DMC1,PTPRM,RAD50,RAD54L,TGIF1	0.91
ALL	1020	Lenalidomide	targeted	TNFA	other	SN-26	CDC42BPA	CDC42,CDC42BPA,CTNND1,MTOR,PTPRM,UBASH3B,YES1	0.91
ALL	1020	Lenalidomide	targeted	TNFA	other	SN-27	LRP1	CTNND1,LRP1,PTPRM,RAC1,SDC4,SERPINE1,TGIF1	0.91
ALL	1020	Lenalidomide	targeted	TNFA	other	SN-28	NID2	CTNNB1,HSPG2,ITGA2,NID2,PTPRM,SLC35D2,VCAN	0.91
ALL	1020	Lenalidomide	targeted	TNFA	other	SN-29	NEB	ACTN1,CTNNB1,NEB,PTPRM,TPM4,TRIP6,TTN	0.91
ALL	1020	Lenalidomide	targeted	TNFA	other	SN-30	KALRN	KALRN,KLK3,PIP5K1C,PTPRM,ROCK1,TGIF1,VAV3	0.96
ALL	1020	Lenalidomide	targeted	TNFA	other	SN-31	FBN2	CTBP1,FBN2,MFAP5,NOTCH1,TGIF1,TUBB2A,UBC	0.96
ALL	1020	Lenalidomide	targeted	TNFA	other	SN-32	CXADR	ACTN1,AMICA1,CTNND1,CXADR,ITGB1,PTPRM,VLDLR	0.91
ALL	1021	Axitinib	targeted	PDGFR, KIT, VEGFR	RTK signaling	SN-01	TP53	CAV1,KCNN4,NME1,TP53	0.83
ALL	1021	Axitinib	targeted	PDGFR, KIT, VEGFR	RTK signaling	SN-02	LTBP1	KCNN4,LGALS1,LTBP1,MYC,TGFB1,UBC	0.87
ALL	1021	Axitinib	targeted	PDGFR, KIT, VEGFR	RTK signaling	SN-03	HERC1,TP53	CISH,HERC1,KCNN4,SOCS2,STAT3,TP53,UBC	0.91
ALL	1021	Axitinib	targeted	PDGFR, KIT, VEGFR	RTK signaling	SN-04	SRRM2	DDIT4L,KCNN4,NME1,POLR2E,SNRPG,SRRM1,SRRM2	0.96
ALL	1021	Axitinib	targeted	PDGFR, KIT, VEGFR	RTK signaling	SN-05	RAD54L	KCNN4,NCF4,NME1,POLD1,RAD52,RAD54L,XRCC6	0.91
ALL	1021	Axitinib	targeted	PDGFR, KIT, VEGFR	RTK signaling	SN-06	SIN3B	IKZF1,KCNN4,SIN3B,TERT	0.87
ALL	1021	Axitinib	targeted	PDGFR, KIT, VEGFR	RTK signaling	SN-07	LTBR	CAV1,KCNN4,LTBR,NCF4,TRAF2,TXN,UBC	0.87
ALL	1021	Axitinib	targeted	PDGFR, KIT, VEGFR	RTK signaling	SN-08	TLN2	CAV1,ITGB1,LGALS1,TLN2,ZBTB17	0.87
ALL	1021	Axitinib	targeted	PDGFR, KIT, VEGFR	RTK signaling	SN-09	CELSR1	CELSR1,FZD6,KCNN4,MYC,NME1,TK1,WNT5A	0.87
ALL	1021	Axitinib	targeted	PDGFR, KIT, VEGFR	RTK signaling	SN-10	ALKBH7	ALKBH1,ALKBH7,ALKBH8,KCNN4,TRMT11,TRMT112,UBC	0.87
ALL	1021	Axitinib	targeted	PDGFR, KIT, VEGFR	RTK signaling	SN-11	TRPV3	KCNN4,PTPN13,SRC,TRPM8,TRPV1,TRPV3,UBC	0.87
ALL	1021	Axitinib	targeted	PDGFR, KIT, VEGFR	RTK signaling	SN-12	ABCA7	ABCA7,APOA1,KCNN4,SNCA,SP1,TK1,UBC	0.87
ALL	1021	Axitinib	targeted	PDGFR, KIT, VEGFR	RTK signaling	SN-13	USH2A	CNTN2,KCNN4,TAX1BP3,UBC,USH1C,USH1G,USH2A	0.87
ALL	1021	Axitinib	targeted	PDGFR, KIT, VEGFR	RTK signaling	SN-14	LAG3	CD8A,KCNN4,LAG3,LCK,TSPO,UBC,VAV1	0.91
ALL	1021	Axitinib	targeted	PDGFR, KIT, VEGFR	RTK signaling	SN-15	CXADR	AMICA1,CXADR,ILK,ITGB1,KCNN4,UBC,ZYX	0.91
ALL	1021	Axitinib	targeted	PDGFR, KIT, VEGFR	RTK signaling	SN-16	HMCN1	ERBB4,HMCN1,SIRPG,SOCS2,STAT5B,TSPO,VWF	0.87
ALL	1021	Axitinib	targeted	PDGFR, KIT, VEGFR	RTK signaling	SN-17	DNAH8	DNAH8,DYNC1H1,KCNN4,PRKAR2B,SNX4,TPR,UBC	0.87
ALL	1021	Axitinib	targeted	PDGFR, KIT, VEGFR	RTK signaling	SN-18	PYGM	BEX1,GYS2,KCNN4,PYGM,TRAF6,UBA52,UBC	0.87
ALL	1021	Axitinib	targeted	PDGFR, KIT, VEGFR	RTK signaling	SN-19	ZNF423	EBF1,IKZF1,KCNN4,NCOR1,SIN3A,TGFB1,ZNF423	0.87
ALL	1021	Axitinib	targeted	PDGFR, KIT, VEGFR	RTK signaling	SN-20	LHX5	CTNNB1,KCNN4,LHX5,SFRP5,UBC,WNT3,WNT8A	0.87
ALL	1024	CEP-701	targeted	FLT3, JAK2, NTRK1, RET	RTK signaling	SN-01	NID2	EP300,LEF1,MMP1,NID1,NID2,SMAD1,TRIP6	0.83
ALL	1024	CEP-701	targeted	FLT3, JAK2, NTRK1, RET	RTK signaling	SN-02	KALRN	CCL5,CHRM3,KALRN,NMS	0.87
ALL	1024	CEP-701	targeted	FLT3, JAK2, NTRK1, RET	RTK signaling	SN-03	SIN3B	ESR1,POU4F1,SIN3B,SMAD1,SMAD4,UBE3A,ZBTB16	0.83
ALL	1024	CEP-701	targeted	FLT3, JAK2, NTRK1, RET	RTK signaling	SN-04	PRPF8	ADCY7,CCL5,POLR2E,PRPF8,S100A10,UBC	0.83
ALL	1024	CEP-701	targeted	FLT3, JAK2, NTRK1, RET	RTK signaling	SN-05	LRP1	APP,CCL5,CHRM3,LRP1,PLG,S100A10,THBS1	0.87
ALL	1024	CEP-701	targeted	FLT3, JAK2, NTRK1, RET	RTK signaling	SN-06	USH2A	CNTN2,S100A10,TES,UBC,USH1C,USH2A,ZNF259	0.87
ALL	1024	CEP-701	targeted	FLT3, JAK2, NTRK1, RET	RTK signaling	SN-07	TRIO	BCL2,POU4F1,PTK2,TRIO,TRIP6	0.91
ALL	1024	CEP-701	targeted	FLT3, JAK2, NTRK1, RET	RTK signaling	SN-08	PCNT	DUSP6,MAPK3,PCNT,SMAD1,YWHAE	0.83
ALL	1024	CEP-701	targeted	FLT3, JAK2, NTRK1, RET	RTK signaling	SN-09	SRRM2	BCL2,POU4F1,PPP1CA,RBM25,SF3A2,SMAD1,SRRM2	0.91
ALL	1024	CEP-701	targeted	FLT3, JAK2, NTRK1, RET	RTK signaling	SN-10	RAD54L	CDC45,DTD1,RAD54L,RECQL,RPA1,S100A10,UBC	0.87
ALL	1024	CEP-701	targeted	FLT3, JAK2, NTRK1, RET	RTK signaling	SN-11	NID2	BAX,HSPG2,NID2,POU4F1,SNCA	0.91
ALL	1024	CEP-701	targeted	FLT3, JAK2, NTRK1, RET	RTK signaling	SN-12	HMCN1	ERBB4,HMCN1,PIK3CG,PLG,S100A10,SIRPG,VWF	0.91
ALL	1024	CEP-701	targeted	FLT3, JAK2, NTRK1, RET	RTK signaling	SN-13	OBSCN	ABR,DLC1,OBSCN,S100A10	0.91
ALL	1024	CEP-701	targeted	FLT3, JAK2, NTRK1, RET	RTK signaling	SN-14	CELSR1	BAX,CELSR1,FZD6,GSK3B,POU4F1,SMAD1,WNT8A	0.91
ALL	1024	CEP-701	targeted	FLT3, JAK2, NTRK1, RET	RTK signaling	SN-15	DUOX2	BCL2,DECR1,DUOX2,DUSP6,MAPK14,POU4F1,TNF	0.87
ALL	1024	CEP-701	targeted	FLT3, JAK2, NTRK1, RET	RTK signaling	SN-16	USH2A	CDK1,NGFRAP1,NINL,PPP1CA,SMAD1,USH2A,YWHAE	0.87
ALL	1024	CEP-701	targeted	FLT3, JAK2, NTRK1, RET	RTK signaling	SN-17	CDC42BPA	CDC42,CDC42BPA,CDKN1A,MYL2,POU4F1,SMAD1,UBC	0.91
ALL	1024	CEP-701	targeted	FLT3, JAK2, NTRK1, RET	RTK signaling	SN-18	NEB	NEB,PXN,TPM2,TRIP6	0.87
ALL	1024	CEP-701	targeted	FLT3, JAK2, NTRK1, RET	RTK signaling	SN-19	HMCN1	BCL2,F3,HMCN1,POU4F1,SIRPG,TFPI,VEGFA	0.91
ALL	1024	CEP-701	targeted	FLT3, JAK2, NTRK1, RET	RTK signaling	SN-20	CXADR	AMICA1,ANXA5,CCL5,CXADR,ITGB1,UBC,ZBTB17	0.91
ALL	1024	CEP-701	targeted	FLT3, JAK2, NTRK1, RET	RTK signaling	SN-21	TRPV3	FAS,S100A10,SRC,TRPM8,TRPV1,TRPV3,TRPV6	0.91
ALL	1024	CEP-701	targeted	FLT3, JAK2, NTRK1, RET	RTK signaling	SN-22	LHX5	LEF1,LHX5,SFRP5,SMAD1,UBC,WNT3A,WNT5B	0.91
ALL	1024	CEP-701	targeted	FLT3, JAK2, NTRK1, RET	RTK signaling	SN-23	ABCA7	ABCA7,APOA1,CREBBP,SMAD1	0.91
ALL	1024	CEP-701	targeted	FLT3, JAK2, NTRK1, RET	RTK signaling	SN-24	ALKBH7	ALKBH1,ALKBH7,ALKBH8,SMAD1,TRMT112,UBC,ZWINT	0.91
ALL	1024	CEP-701	targeted	FLT3, JAK2, NTRK1, RET	RTK signaling	SN-25	MBD6	CCL5,EXOSC8,IL8,MBD6,TES,VASP	0.91
ALL	1024	CEP-701	targeted	FLT3, JAK2, NTRK1, RET	RTK signaling	SN-26	RYR1	FKBP1A,RYR1,SMAD1,SMAD2	0.91
ALL	1024	CEP-701	targeted	FLT3, JAK2, NTRK1, RET	RTK signaling	SN-27	BCL11B	BCL11B,DTX1,NOTCH1,RUNX2,SMAD1	0.87
ALL	1024	CEP-701	targeted	FLT3, JAK2, NTRK1, RET	RTK signaling	SN-28	DNAH9	BAX,BCL2L11,DNAH9,DYNLL1,LEF1,POU4F1,UBC	0.87
ALL	1024	CEP-701	targeted	FLT3, JAK2, NTRK1, RET	RTK signaling	SN-29	FBN2	FBN2,FURIN,SMAD1,TGFB1,VEGFC	0.87
ALL	1024	CEP-701	targeted	FLT3, JAK2, NTRK1, RET	RTK signaling	SN-30	MUC4	ERBB2,MUC4,SMAD1,STUB1	0.87
ALL	1024	CEP-701	targeted	FLT3, JAK2, NTRK1, RET	RTK signaling	SN-31	SNX33	BIN1,DNM1,S100A10,SNX30,SNX33,SNX9,UBC	0.87
ALL	1024	CEP-701	targeted	FLT3, JAK2, NTRK1, RET	RTK signaling	SN-32	SHANK2	SGK1,SHANK2,SLC9A3,SLC9A3R2,SMAD1,TRIP6,UBC	0.87
ALL	1024	CEP-701	targeted	FLT3, JAK2, NTRK1, RET	RTK signaling	SN-33	HERC1,TP53	CEBPA,HERC1,S100A10,SMAD1,TGFB1,TP53,UBC	0.87
ALL	1024	CEP-701	targeted	FLT3, JAK2, NTRK1, RET	RTK signaling	SN-34	MYCBP2	FBXO45,MYCBP2,PSME2,SKP1,SMAD1,UBE2D1,UBE2R2	0.91
ALL	1024	CEP-701	targeted	FLT3, JAK2, NTRK1, RET	RTK signaling	SN-35	CPSF1	CPSF1,ESR1,POU4F1,RBBP6,S100A10,UBC,WDR33	0.91
ALL	1024	CEP-701	targeted	FLT3, JAK2, NTRK1, RET	RTK signaling	SN-36	LAMA3	BCL2,CCL5,LAMA3,LAMB3,POU4F1,PXN,SDC4	0.87
ALL	1028	VX-702	targeted	p38	JNK and p38 signaling	SN-01	NID2	CCL5,CD74,CTSS,HSPG2,NID2,SDC4	0.73
ALL	1028	VX-702	targeted	p38	JNK and p38 signaling	SN-02	SMC4	CD3D,GSPT2,SMC4,UBC,UPF1	0.82
ALL	1028	VX-702	targeted	p38	JNK and p38 signaling	SN-03	BCL11B	BCL11B,CD3D,CDH2,LCK,NOTCH1	0.73
ALL	1028	VX-702	targeted	p38	JNK and p38 signaling	SN-04	HMCN1	CCL5,HMCN1,IL1B,SIRPG,VEGFA	0.91
ALL	1028	VX-702	targeted	p38	JNK and p38 signaling	SN-05	PRPF8	CD3D,GSPT2,LCK,MED28,POLR2A,PRPF8,UPF3B	0.82
ALL	1028	VX-702	targeted	p38	JNK and p38 signaling	SN-06	TP53	GSPT2,HSPB1,PABPC1,TP53	0.86
ALL	1028	VX-702	targeted	p38	JNK and p38 signaling	SN-07	PCNT	GSPT2,NGFRAP1,PCNT,PPP2R1A,TUBG2,UPF1,YWHAE	0.91
ALL	1028	VX-702	targeted	p38	JNK and p38 signaling	SN-08	DNAH9	CD3D,DNAH9,DYNLL1,LCK,NGFRAP1,PAK1,YWHAE	0.86
ALL	1028	VX-702	targeted	p38	JNK and p38 signaling	SN-09	USH2A	CD3D,LCK,MAPK1,NINL,TUBG2,USH2A,YWHAG	0.91
ALL	1028	VX-702	targeted	p38	JNK and p38 signaling	SN-10	SIN3B	CCL5,LGALS1,MAX,SIN3B	0.86
ALL	1028	VX-702	targeted	p38	JNK and p38 signaling	SN-11	FBN2	FBN2,GSPT2,LCK,MFAP2,NOTCH1,UBA52,UPF1	0.86
ALL	1028	VX-702	targeted	p38	JNK and p38 signaling	SN-12	CELSR1	CD3D,CELSR1,DVL2,LCK,SRC,VANGL1,VANGL2	0.86
ALL	1028	VX-702	targeted	p38	JNK and p38 signaling	SN-13	MYH2	CD3D,CD3G,FCGR2A,MYH2	0.86
ALL	1028	VX-702	targeted	p38	JNK and p38 signaling	SN-14	LRP1	CD3D,GSPT2,ITGB3,LRP1,PABPC1,PXN,SHC1	0.86
ALL	1028	VX-702	targeted	p38	JNK and p38 signaling	SN-15	LHX5	CD3D,GSK3B,LCK,LHX5,RELA,SFRP5,WNT8A	0.86
ALL	1028	VX-702	targeted	p38	JNK and p38 signaling	SN-16	HERC1,TP53	GSPT2,HERC1,NGFRAP1,PABPC1L,SORT1,TP53,UBC	0.86
ALL	1028	VX-702	targeted	p38	JNK and p38 signaling	SN-17	CXADR	AMICA1,CD3D,CXADR,ITGB1,LCK,PTK2B,ZBTB17	0.86
ALL	1028	VX-702	targeted	p38	JNK and p38 signaling	SN-18	TRPV3	CD3D,LCK,PRKCE,SYT9,TRPM8,TRPV1,TRPV3	0.86
ALL	1028	VX-702	targeted	p38	JNK and p38 signaling	SN-19	MYH2	CD3D,ITPR1,LCK,MYH2,PRKCZ,SLC2A4,VAMP2	0.86
ALL	1028	VX-702	targeted	p38	JNK and p38 signaling	SN-20	DNMT3B	CD3D,DNMT3B,EZH2,VAV1	0.86
ALL	1028	VX-702	targeted	p38	JNK and p38 signaling	SN-21	ALKBH7	ALKBH1,ALKBH7,ALKBH8,CD3D,TRMT112,UBC,ZUFSP	0.82
ALL	1028	VX-702	targeted	p38	JNK and p38 signaling	SN-22	DUOX2	CD3D,DECR1,DUOX2,IL1B,LCK,PRKCA,VCAM1	0.82
ALL	1028	VX-702	targeted	p38	JNK and p38 signaling	SN-23	CRTC1	CD3D,CRTC1,FOS,PIK3CG	0.82
ALL	1028	VX-702	targeted	p38	JNK and p38 signaling	SN-24	ABCA7	ABCA7,APOA1,CD3D,LCK,SNCA,TCIRG1,TF	0.82
ALL	1028	VX-702	targeted	p38	JNK and p38 signaling	SN-25	LTBP1	CD3D,FN1,LCK,LTBP1,PXN,SRGN,TGFB1	0.82
ALL	1028	VX-702	targeted	p38	JNK and p38 signaling	SN-26	LRP1	CCL5,CD3D,LCK,LRP1,PDGFRB,SDC1,THBS1	0.82
ALL	1028	VX-702	targeted	p38	JNK and p38 signaling	SN-27	RYR3	CD3D,FKBP1A,LCK,PLCG2,PPP3CB,RYR3,TGFBR3	0.82
ALL	1028	VX-702	targeted	p38	JNK and p38 signaling	SN-28	NEB	CD3D,LCK,NEB,PLEK,TPM4,TTN,UBC	0.82
ALL	1028	VX-702	targeted	p38	JNK and p38 signaling	SN-29	SNX33	CD74,DNM2,GSPT2,PABPC4,SNX33,SNX9,UBC	0.82
ALL	1028	VX-702	targeted	p38	JNK and p38 signaling	SN-30	MBD6	CCL5,EXOSC10,EXOSC8,GSPT2,IL8,MBD6,UPF1	0.82
ALL	1028	VX-702	targeted	p38	JNK and p38 signaling	SN-31	SHANK2	CD3D,CD74,CSK,CTSS,CTTN,DNM2,SHANK2	0.82
ALL	1028	VX-702	targeted	p38	JNK and p38 signaling	SN-32	MYCBP2	CD74,GSPT2,MYCBP2,NUP160,RAE1,SEC13,UPF3B	0.82
ALL	1028	VX-702	targeted	p38	JNK and p38 signaling	SN-33	CPSF1	CCL5,CPSF1,CSTF2,GSPT2,MAX,UPF3B,WDR33	0.82
ALL	1030	KU-55933	targeted	ATM	Genome integrity	SN-01	HERC1,TP53	ANXA2,HERC1,LGALS1,S100A10,TP53,UBC	0.83
ALL	1030	KU-55933	targeted	ATM	Genome integrity	SN-02	DNAH8	DNAH8,DYNLT3,GEMIN4,LGALS1,TPR	0.79
ALL	1030	KU-55933	targeted	ATM	Genome integrity	SN-03	DNAH9	DNAH9,DYNLL1,DYNLL2,DYNLT3,KIF26A,LGALS1,UBC	0.79
ALL	1030	KU-55933	targeted	ATM	Genome integrity	SN-04	PCNT	DYNC1H1,HRAS,KIF26A,LGALS1,PCNT,TUBB2A,YWHAG	0.79
ALL	1030	KU-55933	targeted	ATM	Genome integrity	SN-05	EGFR	EGFR,LGALS1,PIK3CG,TNC	0.75
ALL	1030	KU-55933	targeted	ATM	Genome integrity	SN-06	NEB	CYP51A1,NEB,TUBB2A,UBC,VIM	0.83
ALL	1030	KU-55933	targeted	ATM	Genome integrity	SN-07	SIN3B	LGALS1,MAX,SAP30,SIN3B	0.88
ALL	1030	KU-55933	targeted	ATM	Genome integrity	SN-08	ZNF423	CEBPA,CYP51A1,EBF1,LGALS1,SREBF2,UBC,ZNF423	0.88
ALL	1030	KU-55933	targeted	ATM	Genome integrity	SN-09	MYH2	CAPN2,ITGB1,LGALS1,MYH2,ZBTB17	0.88
ALL	1030	KU-55933	targeted	ATM	Genome integrity	SN-10	CDK12	CDK12,ESR1,POLR2A,POU4F1	0.83
ALL	1030	KU-55933	targeted	ATM	Genome integrity	SN-11	ABCA7	ABCA7,APOA1,CYP51A1,GEMIN4,LGALS1,SP1,TGS1	0.88
ALL	1030	KU-55933	targeted	ATM	Genome integrity	SN-12	USH2A	CNTN2,CYP51A1,LGALS1,MAX,NFYB,USH1C,USH2A	0.88
ALL	1030	KU-55933	targeted	ATM	Genome integrity	SN-13	MBD6	EXOSC8,LGALS1,MBD6,TUBB2A,UBC,YWHAB,ZFP36	0.88
ALL	1030	KU-55933	targeted	ATM	Genome integrity	SN-14	OBSCN	ACTN2,HRAS,INPP1,LGALS1,OBSCN,OCRL,TTN	0.88
ALL	1030	KU-55933	targeted	ATM	Genome integrity	SN-15	MUC4	ERBB2,INPP1,LGALS1,MUC4,PLCG1,ST6GAL1,UBC	0.88
ALL	1030	KU-55933	targeted	ATM	Genome integrity	SN-16	DNAH6	DCTN6,DNAH6,GEMIN4,KIF26A,LGALS1,PAFAH1B1,RANBP2	0.88
ALL	1030	KU-55933	targeted	ATM	Genome integrity	SN-17	DUOX2	DECR1,DUOX2,HRAS,IRAK3,LGALS1,NCF2,TNF	0.88
ALL	1030	KU-55933	targeted	ATM	Genome integrity	SN-18	RAD54L	ABL1,CTNNA1,LGALS1,PTPRC,RAD52,RAD54L	0.88
ALL	1030	KU-55933	targeted	ATM	Genome integrity	SN-19	LHX5	GSK3B,HRAS,LGALS1,LHX5,PIK3CG,SFRP5,WNT8B	0.88
ALL	1030	KU-55933	targeted	ATM	Genome integrity	SN-20	ALKBH7	ALKBH1,ALKBH7,ALKBH8,S100A10,TRMT112,TUBB2A,UBC	0.88
ALL	1030	KU-55933	targeted	ATM	Genome integrity	SN-21	USH2A	AURKA,BAX,GSK3B,NINL,POU4F1,USH2A	0.88
ALL	1030	KU-55933	targeted	ATM	Genome integrity	SN-22	CXADR	AMICA1,CXADR,FYN,HRAS,ITGB1,LGALS1,VLDLR	0.88
ALL	1030	KU-55933	targeted	ATM	Genome integrity	SN-23	HMCN1	ERBB4,HMCN1,HRAS,LGALS1,SIRPG,SYK,VWF	0.88
ALL	1030	KU-55933	targeted	ATM	Genome integrity	SN-24	LTBP1	CD3D,CDKN1A,FN1,LTBP1,POU4F1,SYK,TGFB1	0.88
ALL	1030	KU-55933	targeted	ATM	Genome integrity	SN-25	LAG3	CD3D,CD8A,LAG3,LGALS1,PTPRC,SYK,TSPO	0.83
ALL	1030	KU-55933	targeted	ATM	Genome integrity	SN-26	FBN2	CD3D,CYP51A1,FBN2,LCK,MFAP2,NOTCH1,UBC	0.83
ALL	1030	KU-55933	targeted	ATM	Genome integrity	SN-27	TRPV3	LGALS1,TRPM8,TRPV3,UBC,USP10,USP15,ZUFSP	0.83
ALL	1030	KU-55933	targeted	ATM	Genome integrity	SN-28	ARID1A	ARID1A,ESR1,LGALS1,NR3C1,POU4F1,UBC,VDR	0.83
ALL	1030	KU-55933	targeted	ATM	Genome integrity	SN-29	MYH2	CD3D,CD3G,FCGR2A,LGALS1,MYH2,UBC,VAMP2	0.83
ALL	1030	KU-55933	targeted	ATM	Genome integrity	SN-30	RAD54L	CDKN1A,DMC1,LGALS1,POU4F1,RAD54L,RPA1,ZBTB17	0.83
ALL	1030	KU-55933	targeted	ATM	Genome integrity	SN-31	CELSR1	CD3D,CELSR1,FZD6,GNAO1,LGALS1,MAX,WNT5A	0.79
ALL	1030	KU-55933	targeted	ATM	Genome integrity	SN-32	KALRN	CD3D,INPP1,INPP5B,KALRN,VAV1	0.83
ALL	1030	KU-55933	targeted	ATM	Genome integrity	SN-33	LAMA3	BCL2,HRAS,LAMA3,LGALS1,MMP2,POU4F1,SDC2	0.83
ALL	1030	KU-55933	targeted	ATM	Genome integrity	SN-34	LRP1	CD3D,GPC5,HRAS,LGALS1,LRP1,PDGFB,SHC1	0.83
ALL	1030	KU-55933	targeted	ATM	Genome integrity	SN-35	ERCC6,TP53	BAX,ERCC6,LGALS1,MAX,POU4F1,TP53,UBTF	0.83
ALL	1033	Vismodegib	targeted	SMO	other	SN-01	KALRN	GPR65,KALRN,PLCG2,VAV3	0.68
ALL	1033	Vismodegib	targeted	SMO	other	SN-02	HMCN1	HMCN1,LYN,PLCG2,PTK2,SIRPG,VEGFA	0.68
ALL	1033	Vismodegib	targeted	SMO	other	SN-03	TLN2	CDH2,MAL,SRF,TLN2,VCL	0.77
ALL	1033	Vismodegib	targeted	SMO	other	SN-04	RYR3	FKBP1A,GATA1,ITPR1,LMO2,PLCG2,RYR3,YY1	0.77
ALL	1033	Vismodegib	targeted	SMO	other	SN-05	EGFR	EGFR,PAG1,PLCG2,SIPA1,YWHAZ	0.73
ALL	1033	Vismodegib	targeted	SMO	other	SN-06	ARID1A	ARID1A,MEF2C,NR3C1	0.64
ALL	1033	Vismodegib	targeted	SMO	other	SN-07	LTBR	IL1B,LTBR,PLCG2,TLR4,TRAF3	0.64
ALL	1033	Vismodegib	targeted	SMO	other	SN-08	CRTC1	CREB1,CRTC1,GATA3,LMO2,MEF2C,NR3C1,YY1	0.73
ALL	1033	Vismodegib	targeted	SMO	other	SN-09	PYGM	CALM1,ITPR1,LGALS1,PHKB,PLCG2,PYGM,UBC	0.64
ALL	1033	Vismodegib	targeted	SMO	other	SN-10	CDC42BPA	CDC42BPA,LYN,MEF2C,MYL2,PLCG2,PXN,TPM4	0.68
ALL	1033	Vismodegib	targeted	SMO	other	SN-11	DNAH9	DNAH9,DYNLL2,DYNLT3,HNF1A,MAL,MAPK8	0.64
ALL	1033	Vismodegib	targeted	SMO	other	SN-12	COL14A1	ACTA1,CDH2,COL14A1,COL2A1,MAL,MMP9,PTK2	0.68
ALL	1033	Vismodegib	targeted	SMO	other	SN-13	MYCBP2	CDH2,GSPT2,MAPK8,MYCBP2,NUP214,RAE1,UPF3B	0.68
ALL	1033	Vismodegib	targeted	SMO	other	SN-14	TP53	NR3C1,S100A4,TP53,ZBTB8A	0.73
ALL	1033	Vismodegib	targeted	SMO	other	SN-15	ZNF423	EBF1,LCK,LMO2,NR2F2,PLCG2,TCF3,ZNF423	0.73
ALL	1033	Vismodegib	targeted	SMO	other	SN-16	CELSR1	ADAR,CELSR1,MX2,VANGL1,VANGL2	0.68
ALL	1033	Vismodegib	targeted	SMO	other	SN-17	BCL11B	BCL11B,CDH2,MEF2C,NOTCH1,TFDP2	0.73
ALL	1033	Vismodegib	targeted	SMO	other	SN-18	LAG3	CD8A,LAG3,LCK,LYN,PAG1,PLCG2,VAV1	0.73
ALL	1033	Vismodegib	targeted	SMO	other	SN-19	TRPV3	PLCG2,PRKCE,TRPM8,TRPV1,TRPV3	0.73
ALL	1033	Vismodegib	targeted	SMO	other	SN-20	MBD6	EXOSC8,IL1B,IL8,LYN,MBD6	0.77
ALL	1033	Vismodegib	targeted	SMO	other	SN-21	ALKBH7	ALKBH1,ALKBH7,ALKBH8,CDH2,SRC,TRMT112,UBC	0.77
ALL	1033	Vismodegib	targeted	SMO	other	SN-22	ABCA7	ABCA7,APOA1,CDH2,MEF2C,NPPA,TCIRG1,TF	0.82
ALL	1033	Vismodegib	targeted	SMO	other	SN-23	HMCN1	CDH2,HMCN1,MEF2C,NR3C1,SERPINE1,SIRPG,VWF	0.77
ALL	1033	Vismodegib	targeted	SMO	other	SN-24	SNX33	ADAM15,LCK,NR3C1,PLCG2,SNX33,SNX9,UBC	0.82
ALL	1033	Vismodegib	targeted	SMO	other	SN-25	USH2A	LYN,NINL,NRAS,PDZD7,PLCG2,USH2A,YWHAG	0.82
ALL	1033	Vismodegib	targeted	SMO	other	SN-26	OBSCN	CDC42,CDH2,MEF2C,OBSCN,PLCG2,TRIP10,VAV3	0.77
ALL	1033	Vismodegib	targeted	SMO	other	SN-27	TRIO	CDH2,PLCG2,RAC1,RGS19,TRIO,UTS2,XCR1	0.77
ALL	1033	Vismodegib	targeted	SMO	other	SN-28	NID2,TP53	CDH2,IL1B,MMP9,NID1,NID2,S100A4,TP53	0.77
ALL	1033	Vismodegib	targeted	SMO	other	SN-29	MYH2	CDH2,FCGR2A,LYN,MYH2,PLCG2,RHOA,VAMP2	0.77
ALL	1033	Vismodegib	targeted	SMO	other	SN-30	ESPL1	CDH2,ESPL1,SMAD7,UBB	0.68
ALL	1033	Vismodegib	targeted	SMO	other	SN-31	LTBR	CDH2,LGALS1,LTBR,MAP2K6,MEF2C,TRAF2,UBC	0.68
ALL	1033	Vismodegib	targeted	SMO	other	SN-32	LHX5	LHX5,LYN,MNX1,PLCG2,RAC1,SFRP5,WNT1	0.68
ALL	1033	Vismodegib	targeted	SMO	other	SN-33	PYGM	G6PC,HNF1A,MAL,NR3C1,PGM1,PYGM,UBC	0.68
ALL	1033	Vismodegib	targeted	SMO	other	SN-34	LTBR	IRF7,LTBR,MEF2C,MX2,NR3C1,TRAF3,UBE2I	0.68
ALL	1033	Vismodegib	targeted	SMO	other	SN-35	SIN3B	CDH2,GATA2,LMO2,MEF2C,SIN3B,SMAD3,ZBTB16	0.68
ALL	1033	Vismodegib	targeted	SMO	other	SN-36	ARID1A	ARID1A,IRF6,LMO2,MX2,NR3C1,TCF3,VDR	0.68
ALL	1033	Vismodegib	targeted	SMO	other	SN-37	OBSCN	FHL2,MAL,OBSCN,PLCG2,RAC2,SRF,TTN	0.68
ALL	1033	Vismodegib	targeted	SMO	other	SN-38	DNAH8	CDH2,DNAH8,MEF2C,MEF2D,MYH14,TPR,WDTC1	0.68
ALL	1033	Vismodegib	targeted	SMO	other	SN-39	SHANK2	CDH2,CTNND1,DNM2,NANOS1,PLCG2,SHANK2,VAV1	0.68
ALL	1033	Vismodegib	targeted	SMO	other	SN-40	LTBR	CDH2,LTBR,PLCG2,SRC,TNFRSF11A,TNFSF14,TRAF5	0.68
ALL	1033	Vismodegib	targeted	SMO	other	SN-41	MBD6	CDH2,EXOSC8,MBD6,MEF2C,PNPT1,POLR2L,PPARGC1A	0.68
ALL	1033	Vismodegib	targeted	SMO	other	SN-42	ESPL1	CDH2,ESPL1,MEF2C,MLF1IP,STAG1,UBE2I,ZWINT	0.68
ALL	1033	Vismodegib	targeted	SMO	other	SN-43	LHX5	CDH2,LHX5,LMO2,LRP5,SFRP5,TCF3,WNT8B	0.68
ALL	1033	Vismodegib	targeted	SMO	other	SN-44	CXADR	ACTA1,AMICA1,CXADR,ITGB1,LGALS1,MAL,ZBTB17	0.68
ALL	1033	Vismodegib	targeted	SMO	other	SN-45	FBN2	CDH2,FBN2,MEF2C,MFAP1,MFAP5,POLR2A,SNRNP40	0.68
ALL	1033	Vismodegib	targeted	SMO	other	SN-46	LTBP1	CDH2,GATA3,LMO2,LTBP1,SMAD7,TGFB1,XPO1	0.68
ALL	1033	Vismodegib	targeted	SMO	other	SN-47	DNAH9	CDH2,CTNNB1,DNAH9,FOXJ1,LDB1,LMO2,PITX2	0.64
ALL	1036	PLX4720	targeted	BRAF	ERK MAPK signaling	SN-01	TP53	FHL2,RORB,RUNX2,TP53,VDR	0.91
ALL	1036	PLX4720	targeted	BRAF	ERK MAPK signaling	SN-02	LAMA3	LAMA3,LEF1,MMP2,RAG2	0.91
ALL	1036	PLX4720	targeted	BRAF	ERK MAPK signaling	SN-03	LAG3	CD8A,IL2RB,LAG3,LGALS1,PTPRC	0.96
ALL	1036	PLX4720	targeted	BRAF	ERK MAPK signaling	SN-04	ESPL1	ESPL1,LEF1,SMAD1,SMAD2,UBB	0.91
ALL	1036	PLX4720	targeted	BRAF	ERK MAPK signaling	SN-05	PFKFB2	PFKFB2,SMAD1,UBC,YOD1	0.96
ALL	1036	PLX4720	targeted	BRAF	ERK MAPK signaling	SN-06	SMC4	CCND2,CDKN2A,RB1,RUNX2,SMC4	0.91
ALL	1036	PLX4720	targeted	BRAF	ERK MAPK signaling	SN-07	SIN3B	CCND2,LGALS1,MAX,SIN3B	0.91
ALL	1036	PLX4720	targeted	BRAF	ERK MAPK signaling	SN-08	DNAH9	DNAH9,FOXJ1,LEF1,PITX2,TLE1	0.91
ALL	1036	PLX4720	targeted	BRAF	ERK MAPK signaling	SN-09	TLN2	CAPN2,ITGB1,LGALS1,PLEK,PTPRC,TLN2,VCL	0.96
ALL	1036	PLX4720	targeted	BRAF	ERK MAPK signaling	SN-10	PRPF8	CDKN2A,ESR1,GTF2F1,PRPF8,RORB,UBC	0.96
ALL	1036	PLX4720	targeted	BRAF	ERK MAPK signaling	SN-11	SHANK2	CCND2,CDK5,DLG4,PPARG,RORB,SHANK2	0.87
ALL	1036	PLX4720	targeted	BRAF	ERK MAPK signaling	SN-12	EGFR	EGFR,PPARA,RORB,SLC9A3R1	0.91
ALL	1036	PLX4720	targeted	BRAF	ERK MAPK signaling	SN-13	DUOX2	AKT1,DECR1,DUOX2,PLEK,RUNX2	0.91
ALL	1036	PLX4720	targeted	BRAF	ERK MAPK signaling	SN-14	LTBR	CDKN2A,LGALS1,LTBR,MYC,TNIK,TRAF2	0.91
ALL	1036	PLX4720	targeted	BRAF	ERK MAPK signaling	SN-15	MUC4	ERBB2,ESR2,GALNT3,MUC4,RORB	0.87
ALL	1036	PLX4720	targeted	BRAF	ERK MAPK signaling	SN-16	ERCC6	CCND2,CDKN2A,ERCC6,HDAC1,LGALS1,UBC,XPC	0.91
ALL	1036	PLX4720	targeted	BRAF	ERK MAPK signaling	SN-17	NEB	FHL2,NEB,PLEK,TTN	0.96
ALL	1036	PLX4720	targeted	BRAF	ERK MAPK signaling	SN-18	PFKFB2	CCND2,CDKN2A,FOXO3,PFKFB2,PRKAA1,RORB,VDR	0.91
ALL	1036	PLX4720	targeted	BRAF	ERK MAPK signaling	SN-19	PYGM	HIF1A,LGALS1,NR1D1,PGM1,PYGM,RORB,UBC	0.91
ALL	1036	PLX4720	targeted	BRAF	ERK MAPK signaling	SN-20	HERC1,TP53	CDKN2A,HERC1,S100A4,TP53	0.87
ALL	1036	PLX4720	targeted	BRAF	ERK MAPK signaling	SN-21	RYR1	FKBP1A,MED1,RORB,RYR1,TGFB1	0.91
ALL	1036	PLX4720	targeted	BRAF	ERK MAPK signaling	SN-22	LRP1	CTGF,LEF1,LRP1,SMAD1,SMAD4,TGFB1,THBS1	0.87
ALL	1036	PLX4720	targeted	BRAF	ERK MAPK signaling	SN-23	USH2A	CDK1,CDKN2A,HRAS,LGALS1,NINL,USH2A,YWHAG	0.87
ALL	1036	PLX4720	targeted	BRAF	ERK MAPK signaling	SN-24	ABCA7	ABCA7,APOA1,CDKN2A,PPARA,RORB,SP1,TBL1XR1	0.87
ALL	1036	PLX4720	targeted	BRAF	ERK MAPK signaling	SN-25	LRP1	LRP1,NR0B2,RORB,SRC	0.91
ALL	1036	PLX4720	targeted	BRAF	ERK MAPK signaling	SN-26	SRRM2	CREBBP,GTF2F1,LEF1,SMAD1,SRRM1,SRRM2,U2AF2	0.83
ALL	1036	PLX4720	targeted	BRAF	ERK MAPK signaling	SN-27	PCNT	CCND2,CDK5,CDK5RAP2,CDKN2A,PCNT,TUBG1,YWHAE	0.83
ALL	1036	PLX4720	targeted	BRAF	ERK MAPK signaling	SN-28	HMCN1,TP53	CDKN2A,HMCN1,PPARG,RORB,SIRPG,TP53,VEGFA	0.83
ALL	1036	PLX4720	targeted	BRAF	ERK MAPK signaling	SN-29	SRRM2	AR,PRPF6,RORB,SRRM2	0.78
ALL	1036	PLX4720	targeted	BRAF	ERK MAPK signaling	SN-30	SRRM2	FHL2,MED1,POLR2A,RORB,SRRM1,SRRM2,YBX1	0.87
ALL	1036	PLX4720	targeted	BRAF	ERK MAPK signaling	SN-31	PCNT	HSP90AA1,PCNT,PPARD,RORB	0.83
ALL	1036	PLX4720	targeted	BRAF	ERK MAPK signaling	SN-32	HMCN1	ERBB4,HMCN1,LEF1,SIRPG,SMAD1,UBC,YAP1	0.87
ALL	1036	PLX4720	targeted	BRAF	ERK MAPK signaling	SN-33	MBD6	EXOSC8,IL8,LEF1,MBD6,TCF7L2	0.87
ALL	1036	PLX4720	targeted	BRAF	ERK MAPK signaling	SN-34	ALKBH7	ALKBH1,ALKBH3,ALKBH7,ALKBH8,SMAD1,TRMT112,UBC	0.87
ALL	1036	PLX4720	targeted	BRAF	ERK MAPK signaling	SN-35	RAD54L	CDKN2A,ESR2,MSH2,RAD51,RAD54L,RORB,WRN	0.83
ALL	1036	PLX4720	targeted	BRAF	ERK MAPK signaling	SN-36	TRPV3	CAV1,RORB,SRC,TRPM8,TRPV1,TRPV3,VDR	0.87
ALL	1036	PLX4720	targeted	BRAF	ERK MAPK signaling	SN-37	PYGM	CCND2,CDKN2A,GSK3B,GYS1,PHKG1,PYGM,SMAD1	0.83
ALL	1036	PLX4720	targeted	BRAF	ERK MAPK signaling	SN-38	MYCBP2	GCK,HNF4A,MYCBP2,RAE1,RORB	0.83
ALL	1036	PLX4720	targeted	BRAF	ERK MAPK signaling	SN-39	OBSCN	CAV1,OBSCN,PLEK,RHOC,SMAD1,SYDE2,TTN	0.83
ALL	1036	PLX4720	targeted	BRAF	ERK MAPK signaling	SN-40	ZNF423	CREBBP,EBF1,MED1,RORB,SMAD1,TCF3,ZNF423	0.83
ALL	1036	PLX4720	targeted	BRAF	ERK MAPK signaling	SN-41	DNMT3B	CDKN2A,DNMT3B,MED1,RORB,SIN3A,SUZ12,TTF1	0.83
ALL	1036	PLX4720	targeted	BRAF	ERK MAPK signaling	SN-42	CELSR1	CELSR1,RORA,RORB,VANGL2	0.83
ALL	1036	PLX4720	targeted	BRAF	ERK MAPK signaling	SN-43	USH2A	NINL,RUNX2,SMAD1,TBL1XR1,TLE1,TUBGCP3,USH2A	0.83
ALL	1036	PLX4720	targeted	BRAF	ERK MAPK signaling	SN-44	CRTC1	CDKN2A,CRTC1,JUN,LEF1,LGALS1,MMP1,TNC	0.83
ALL	1036	PLX4720	targeted	BRAF	ERK MAPK signaling	SN-45	NID2,TP53	CDKN2A,LEF1,MMP9,NID1,NID2,RAG2,TP53	0.83
ALL	1036	PLX4720	targeted	BRAF	ERK MAPK signaling	SN-46	COL14A1	COL14A1,COL1A1,LEF1,MMP9,MSX2,RUNX2,SMAD1	0.83
ALL	1036	PLX4720	targeted	BRAF	ERK MAPK signaling	SN-47	SIN3B	CDKN2A,LEF1,RARA,RORB,SIN3B,SMAD3,ZBTB16	0.78
ALL	1036	PLX4720	targeted	BRAF	ERK MAPK signaling	SN-48	DUOX2	AGT,DECR1,DUOX2,MME,PPARA,RORB,XDH	0.83
ALL	1036	PLX4720	targeted	BRAF	ERK MAPK signaling	SN-49	SHANK2	CAV1,DNM2,LGALS1,SHANK2,SMAD1,UBC,VAV1	0.78
ALL	1036	PLX4720	targeted	BRAF	ERK MAPK signaling	SN-50	LTBP1	ALDOA,ESR1,FN1,LTBP1,RORB,SMAD1,TGFB1	0.78
ALL	1036	PLX4720	targeted	BRAF	ERK MAPK signaling	SN-51	FBN2	CDH1,FBN2,FURIN,LEF1,PROC,S100A4	0.78
ALL	1036	PLX4720	targeted	BRAF	ERK MAPK signaling	SN-52	CDC42BPA	CCND1,CDC42,CDC42BPA,CDKN2A,LEF1,MYL2,TPM2	0.78
ALL	1036	PLX4720	targeted	BRAF	ERK MAPK signaling	SN-53	TRPV3	CDKN2A,SMAD1,TRPM8,TRPV3,UBC,USP10,WAPAL	0.78
ALL	1036	PLX4720	targeted	BRAF	ERK MAPK signaling	SN-54	MYCBP2	FBXO45,MYCBP2,NR1D2,RORB,SKP1,SMAD1,UBE2D1	0.78
ALL	1036	PLX4720	targeted	BRAF	ERK MAPK signaling	SN-55	TRIO	CAV1,CHRM3,PROK2,SMAD1,TRIO,WASL,XCR1	0.78
ALL	1036	PLX4720	targeted	BRAF	ERK MAPK signaling	SN-56	ESPL1	ESPL1,RORB,SMAD1,TOP2B,UBC,VDR,ZWINT	0.78
ALL	1036	PLX4720	targeted	BRAF	ERK MAPK signaling	SN-57	BCL11B	BCL11B,CCND2,HDAC1,HDAC2,LEF1,RORB,THRB	0.78
ALL	1036	PLX4720	targeted	BRAF	ERK MAPK signaling	SN-58	NEB	LEF1,NEB,RORB,SMAD4,THOC5,VDR,VIM	0.78
ALL	1036	PLX4720	targeted	BRAF	ERK MAPK signaling	SN-59	MBD6	CDKN2A,EXOSC8,MBD6,MYC,SMAD1,TGFB1,ZFP36L1	0.78
ALL	1037	BX-795	targeted	TBK1, PDPK1, IKK, AURKB, AURKC	other	SN-01	EGFR	CAV1,EGFR,KCNN4,UBC	0.88
ALL	1037	BX-795	targeted	TBK1, PDPK1, IKK, AURKB, AURKC	other	SN-02	SMC4	FBXO43,PLK1,PRKAR2B,SMC4,UBC,UBE2E2	0.79
ALL	1037	BX-795	targeted	TBK1, PDPK1, IKK, AURKB, AURKC	other	SN-03	CDK12	ADCY3,CDK12,PDE9A,POLR2A,PRKAR2B	0.79
ALL	1037	BX-795	targeted	TBK1, PDPK1, IKK, AURKB, AURKC	other	SN-04	CELSR1	ADAR,CELSR1,ISG15,RNASEL,UBE2E2,VANGL2	0.79
ALL	1037	BX-795	targeted	TBK1, PDPK1, IKK, AURKB, AURKC	other	SN-05	ABCA7	ABCA7,ALDH3A2,APOA1,CST3,EHHADH	0.83
ALL	1037	BX-795	targeted	TBK1, PDPK1, IKK, AURKB, AURKC	other	SN-06	MBD6	ADSSL1,ENTPD5,EXOSC8,MBD6,PDE9A,PNPT1	0.83
ALL	1037	BX-795	targeted	TBK1, PDPK1, IKK, AURKB, AURKC	other	SN-07	HMCN1	HMCN1,PRKAR2B,SIRPG,TLN1,UBA1,UBE2E2,VWF	0.92
ALL	1037	BX-795	targeted	TBK1, PDPK1, IKK, AURKB, AURKC	other	SN-08	USH2A	CEP63,NINL,PRKAR2B,USH2A	0.88
ALL	1037	BX-795	targeted	TBK1, PDPK1, IKK, AURKB, AURKC	other	SN-09	ALKBH7	ALKBH1,ALKBH7,ALKBH8,TRMT11,TRMT112,UBC,UBE2E2	0.88
ALL	1037	BX-795	targeted	TBK1, PDPK1, IKK, AURKB, AURKC	other	SN-10	TRPV3	ISG15,PSMB1,TRPM8,TRPV3,UBE2E1,UBE2E2,USP10	0.88
ALL	1037	BX-795	targeted	TBK1, PDPK1, IKK, AURKB, AURKC	other	SN-11	DNAH6	DCTN1,DNAH6,KCNN4,PAFAH1B1,PRKAR2B,RILP,UBC	0.83
ALL	1037	BX-795	targeted	TBK1, PDPK1, IKK, AURKB, AURKC	other	SN-12	ZNF423	CEBPA,EBF1,PRTN3,SERPINB1,ZNF423	0.79
ALL	1037	BX-795	targeted	TBK1, PDPK1, IKK, AURKB, AURKC	other	SN-13	LHX5	KCNN4,LHX5,RSPO1,SFRP5,UBC,WNT3,WNT4	0.79
ALL	1037	BX-795	targeted	TBK1, PDPK1, IKK, AURKB, AURKC	other	SN-14	PFKFB2	HK1,KCNN4,PFKFB2,PHPT1	0.79
ALL	1037	BX-795	targeted	TBK1, PDPK1, IKK, AURKB, AURKC	other	SN-15	COL14A1	CAV1,COL14A1,COL6A1,ITGA1,PRKAR2B	0.79
ALL	1037	BX-795	targeted	TBK1, PDPK1, IKK, AURKB, AURKC	other	SN-16	LAG3	CD86,CD8A,KCNN4,LAG3,UBC,UBE2E2,VAV1	0.79
ALL	1037	BX-795	targeted	TBK1, PDPK1, IKK, AURKB, AURKC	other	SN-17	MBD6	AKT1,EXOSC8,IL8,KCNN4,MBD6,UBC,ZFP36L1	0.79
ALL	1037	BX-795	targeted	TBK1, PDPK1, IKK, AURKB, AURKC	other	SN-18	SIN3B,TP53	IKZF1,KCNN4,PCBP4,SIN3B,TP53	0.79
ALL	1037	BX-795	targeted	TBK1, PDPK1, IKK, AURKB, AURKC	other	SN-19	MUC4	CAV1,ERBB2,GALNT12,MUC4	0.79
ALL	1037	BX-795	targeted	TBK1, PDPK1, IKK, AURKB, AURKC	other	SN-20	BCL11B	AR,BCL11B,CAV1,HDAC1,PDE9A	0.83
ALL	1037	BX-795	targeted	TBK1, PDPK1, IKK, AURKB, AURKC	other	SN-21	DUOX2	ARG2,CAV1,DECR1,DUOX2,NOS3	0.83
ALL	1037	BX-795	targeted	TBK1, PDPK1, IKK, AURKB, AURKC	other	SN-22	DNAH8	CAV1,DNAH8,MATK,NTRK1	0.83
ALL	1038	NU-7441	targeted	PRKDC (DNAPK)	Genome integrity	SN-01	EGFR	CD3D,EGFR,LCK	0.71
ALL	1038	NU-7441	targeted	PRKDC (DNAPK)	Genome integrity	SN-02	TP53	CD3D,NGFRAP1,SHC1,SORT1,TP53	0.62
ALL	1038	NU-7441	targeted	PRKDC (DNAPK)	Genome integrity	SN-03	KALRN	CD3D,GNB1,KALRN,RHOH	0.58
ALL	1038	NU-7441	targeted	PRKDC (DNAPK)	Genome integrity	SN-04	KALRN	CD3D,GRAP2,KALRN,NGF,NGFRAP1,RHOG,VAV3	0.67
ALL	1038	NU-7441	targeted	PRKDC (DNAPK)	Genome integrity	SN-05	PCNT	CD3D,LCK,NGFRAP1,PCNT,PRKAR2B,RHOA,YWHAE	0.71
ALL	1038	NU-7441	targeted	PRKDC (DNAPK)	Genome integrity	SN-06	CPSF1	CASP3,CD3D,CPSF1,NGFRAP1,PRKCQ,PTBP1,SRRM1	0.67
ALL	1038	NU-7441	targeted	PRKDC (DNAPK)	Genome integrity	SN-07	DNAH8	CD3D,DNAH8,NTRK1,PLCG1	0.67
ALL	1038	NU-7441	targeted	PRKDC (DNAPK)	Genome integrity	SN-08	CRTC1	CD3D,CREB1,CRTC1,FOS,NGFR,NGFRAP1,PLCG1	0.71
ALL	1038	NU-7441	targeted	PRKDC (DNAPK)	Genome integrity	SN-09	MYH2	CD3D,CD3G,FCGR2A,MYH2	0.58
ALL	1038	NU-7441	targeted	PRKDC (DNAPK)	Genome integrity	SN-10	DUOX2	CD3D,DECR1,DUOX2,LCK,MAPK14,RAC3,RHOH	0.58
ALL	1038	NU-7441	targeted	PRKDC (DNAPK)	Genome integrity	SN-11	MUC4	CD3D,MUC1,MUC4,ZAP70	0.58
ALL	1038	NU-7441	targeted	PRKDC (DNAPK)	Genome integrity	SN-12	ABCA7	ABCA7,ABCG1,APOA1,B2M,CD3D	0.62
ALL	1038	NU-7441	targeted	PRKDC (DNAPK)	Genome integrity	SN-13	MYCBP2	CASP2,CD3D,EIF4E,MYCBP2,NGFRAP1,RAE1,UBC	0.62
ALL	1038	NU-7441	targeted	PRKDC (DNAPK)	Genome integrity	SN-14	RYR1	CD3D,HOMER3,IKBKB,NGFRAP1,PDPK1,RYR1,TSC1	0.67
ALL	1038	NU-7441	targeted	PRKDC (DNAPK)	Genome integrity	SN-15	BCL11B	BCL11B,CD3D,HDAC1,JUN	0.67
ALL	1038	NU-7441	targeted	PRKDC (DNAPK)	Genome integrity	SN-16	CELSR1	CD3D,CELSR1,FZD6,GNAO1	0.62
ALL	1038	NU-7441	targeted	PRKDC (DNAPK)	Genome integrity	SN-17	CELSR1	ARHGEF7,CD3D,CELSR1,PLCG1,RHOH,SCRIB,VANGL2	0.67
ALL	1038	NU-7441	targeted	PRKDC (DNAPK)	Genome integrity	SN-18	CXADR	AMICA1,CD3D,CXADR,ITGA4,JAM3,SRC,TRAT1	0.62
ALL	1038	NU-7441	targeted	PRKDC (DNAPK)	Genome integrity	SN-19	LHX5	CD3D,GSK3B,LCK,LHX5,RELA,SFRP5,WNT8A	0.67
ALL	1038	NU-7441	targeted	PRKDC (DNAPK)	Genome integrity	SN-20	TRPV3	CD3D,CDK1,LCK,PRKCB,TRPM8,TRPV3,USP10	0.67
ALL	1038	NU-7441	targeted	PRKDC (DNAPK)	Genome integrity	SN-21	LAG3	BCL2,CD3D,CD8A,DIABLO,LAG3,NGFRAP1,ZAP70	0.67
ALL	1038	NU-7441	targeted	PRKDC (DNAPK)	Genome integrity	SN-22	HMCN1	CD3D,CD47,HMCN1,PTPN11,SIRPG	0.62
ALL	1038	NU-7441	targeted	PRKDC (DNAPK)	Genome integrity	SN-23	RYR1,RYR3	CD3D,FKBP1B,LCK,RYR1,RYR3,SRC,TRPC3	0.67
ALL	1038	NU-7441	targeted	PRKDC (DNAPK)	Genome integrity	SN-24	SIN3B	CD3D,GLI1,GNAI1,SIN3B	0.67
ALL	1038	NU-7441	targeted	PRKDC (DNAPK)	Genome integrity	SN-25	RAD54L	CD3D,LCK,NFKBIA,RAD52,RAD54L,SUMO1,WRN	0.62
ALL	1038	NU-7441	targeted	PRKDC (DNAPK)	Genome integrity	SN-26	ALKBH7	ALKBH1,ALKBH7,ALKBH8,CD3D,TRMT112,UBC,ZNF131	0.62
ALL	1038	NU-7441	targeted	PRKDC (DNAPK)	Genome integrity	SN-27	FBN2	CD3D,FBN2,LCK,MAP3K5,MFAP2,NOTCH1,UBC	0.58
ALL	1038	NU-7441	targeted	PRKDC (DNAPK)	Genome integrity	SN-28	MBD6	CD3D,EXOSC8,IL8,MBD6,RGS1	0.58
ALL	1038	NU-7441	targeted	PRKDC (DNAPK)	Genome integrity	SN-29	RYR3	CD3D,FKBP1A,RHOA,RHOH,RYR3,SYK,ZFYVE9	0.62
ALL	1038	NU-7441	targeted	PRKDC (DNAPK)	Genome integrity	SN-30	DNAH9	CD3D,DNAH9,DYNLL1,DYNLL2,HSP90AA1,KIF26A,LCK	0.67
ALL	1038	NU-7441	targeted	PRKDC (DNAPK)	Genome integrity	SN-31	CDK12	CD3D,CDK12,IL2RG,IRF4,POLR2A	0.62
ALL	1038	NU-7441	targeted	PRKDC (DNAPK)	Genome integrity	SN-32	USH2A	DYNLL1,KIF26A,NGFRAP1,NINL,PDZD7,USH2A,YWHAE	0.58
ALL	1038	NU-7441	targeted	PRKDC (DNAPK)	Genome integrity	SN-33	ZNF423	CD3D,EBF1,LCK,NFKB1,RYK,WNT1,ZNF423	0.62
ALL	1038	NU-7441	targeted	PRKDC (DNAPK)	Genome integrity	SN-34	SHANK2	CBL,CD3D,CD74,DNM2,SHANK2	0.58
ALL	1038	NU-7441	targeted	PRKDC (DNAPK)	Genome integrity	SN-35	NID2	CD3D,FASLG,MAP3K5,MMP7,NID1,NID2,SYK	0.58
ALL	1038	NU-7441	targeted	PRKDC (DNAPK)	Genome integrity	SN-36	NID2	CD3D,CD74,CTSS,HSPG2,NID2,SNCA,UBC	0.54
ALL	1038	NU-7441	targeted	PRKDC (DNAPK)	Genome integrity	SN-37	DNAH8	CD3D,DCTN3,DNAH8,KIF26A,SYK,VWF,WDTC1	0.54
ALL	1039	SL 0101-1	targeted	RSK, AURKB, PIM3	ERK MAPK signaling	SN-01	TP53	PMAIP1,POU4F1,TP53,TWIST1	0.76
ALL	1039	SL 0101-1	targeted	RSK, AURKB, PIM3	ERK MAPK signaling	SN-02	EGFR	EGFR,ESR1,HBEGF,POU4F1	0.9
ALL	1039	SL 0101-1	targeted	RSK, AURKB, PIM3	ERK MAPK signaling	SN-03	CRTC1	CRTC1,ESR1,FOS,POU4F1,PTGER4,TRIP6,VIP	0.95
ALL	1039	SL 0101-1	targeted	RSK, AURKB, PIM3	ERK MAPK signaling	SN-04	DNAH9	BCL2L11,DNAH9,DYNLL1,HSPB1,PMAIP1,POU4F1,YWHAE	0.95
ALL	1039	SL 0101-1	targeted	RSK, AURKB, PIM3	ERK MAPK signaling	SN-05	DNAH8	BCL2,DCTN2,DNAH8,IRS1,NTRK1,POU4F1	0.95
ALL	1039	SL 0101-1	targeted	RSK, AURKB, PIM3	ERK MAPK signaling	SN-06	ARID1A,TP53	ARID1A,ESR1,HSPB1,POLR2A,POU4F1,SMARCD1,TP53	0.95
ALL	1039	SL 0101-1	targeted	RSK, AURKB, PIM3	ERK MAPK signaling	SN-07	BCL11B	BCL11B,CDKN1A,HDAC2,PCGF2,POU4F1	0.95
ALL	1039	SL 0101-1	targeted	RSK, AURKB, PIM3	ERK MAPK signaling	SN-08	CXADR	AMICA1,CASP3,CDKN1A,CXADR,HSPB1,ITGB1,POU4F1	0.95
ALL	1039	SL 0101-1	targeted	RSK, AURKB, PIM3	ERK MAPK signaling	SN-09	SHANK2	BAX,CTTN,POU4F1,PTGER4,SHANK2,SIRT1,SRC	0.95
ALL	1039	SL 0101-1	targeted	RSK, AURKB, PIM3	ERK MAPK signaling	SN-10	COL14A1	BAX,COL14A1,HBEGF,MMP2,MMP9,POU4F1,PTEN	0.95
ALL	1039	SL 0101-1	targeted	RSK, AURKB, PIM3	ERK MAPK signaling	SN-11	HMCN1	ERBB4,HBEGF,HMCN1,PMAIP1,POU4F1,SIRPG,UBC	0.95
ALL	1039	SL 0101-1	targeted	RSK, AURKB, PIM3	ERK MAPK signaling	SN-12	MBD6	ESR1,EXOSC8,IGF1R,MBD6,POU4F1,YWHAB,ZFP36L1	0.95
ALL	1039	SL 0101-1	targeted	RSK, AURKB, PIM3	ERK MAPK signaling	SN-13	DNMT3B	DNMT3B,MAX,PCGF2,PMAIP1,POU4F1,SAP30,UBE2I	0.95
ALL	1039	SL 0101-1	targeted	RSK, AURKB, PIM3	ERK MAPK signaling	SN-14	TRPV3	ESR1,POU4F1,TRPM8,TRPV3,UBC,USP10,USP4	0.9
ALL	1039	SL 0101-1	targeted	RSK, AURKB, PIM3	ERK MAPK signaling	SN-15	LHX5	BAX,LHX5,MAPK8,POU4F1,SFRP5,WNT5A,WNT8A	0.9
ALL	1039	SL 0101-1	targeted	RSK, AURKB, PIM3	ERK MAPK signaling	SN-16	DNAH6	CENPE,DCTN2,DNAH6,ESR1,PAFAH1B1,POU4F1,TUBA1A	0.9
ALL	1039	SL 0101-1	targeted	RSK, AURKB, PIM3	ERK MAPK signaling	SN-17	ABCA7	ABCA7,APOA1,PMAIP1,POU4F1,SNW1,TBL1X,TFDP1	0.9
ALL	1039	SL 0101-1	targeted	RSK, AURKB, PIM3	ERK MAPK signaling	SN-18	ALKBH7	ALKBH1,ALKBH7,ALKBH8,HSPB1,TRMT112,UBC	0.95
ALL	1039	SL 0101-1	targeted	RSK, AURKB, PIM3	ERK MAPK signaling	SN-19	TP53,USH2A	BAX,CNTN2,NFYB,POU4F1,TP53,USH1C,USH2A	0.95
ALL	1039	SL 0101-1	targeted	RSK, AURKB, PIM3	ERK MAPK signaling	SN-20	SHANK2	BCL2,DNM2,PIK3CG,POU4F1,RAC1,SHANK2,VAV1	0.9
ALL	1039	SL 0101-1	targeted	RSK, AURKB, PIM3	ERK MAPK signaling	SN-21	DUOX2	DECR1,DUOX2,ESR1,PIK3CG,POU4F1,RAC2,RAC3	0.9
ALL	1039	SL 0101-1	targeted	RSK, AURKB, PIM3	ERK MAPK signaling	SN-22	LTBR	BCL2,LTBR,NPDC1,POU4F1,SQSTM1,TRAF2,UBC	0.9
ALL	1039	SL 0101-1	targeted	RSK, AURKB, PIM3	ERK MAPK signaling	SN-23	LAG3	BCL2,CD8A,LAG3,PAG1,POU4F1,SELL,ZBTB7B	0.9
ALL	1039	SL 0101-1	targeted	RSK, AURKB, PIM3	ERK MAPK signaling	SN-24	MYCBP2	ALDOC,BAX,GCK,MYCBP2,POU4F1,RAE1,UBC	0.9
ALL	1039	SL 0101-1	targeted	RSK, AURKB, PIM3	ERK MAPK signaling	SN-25	ZNF423	BAX,CYP51A1,EBF1,EP300,POU4F1,SREBF2,ZNF423	0.9
ALL	1039	SL 0101-1	targeted	RSK, AURKB, PIM3	ERK MAPK signaling	SN-26	PYGM	ALDOA,ALDOC,ESR1,GBE1,PGM1,POU4F1,PYGM	0.9
ALL	1043	JNK Inhibitor VIII	targeted	JNK	JNK and p38 signaling	SN-01	TP53	S100A4,S100A6,TP53	0.79
ALL	1043	JNK Inhibitor VIII	targeted	JNK	JNK and p38 signaling	SN-02	PFKFB2	PFKFB2,SMAD1,TCEAL1,TCEAL4,UBC	0.79
ALL	1043	JNK Inhibitor VIII	targeted	JNK	JNK and p38 signaling	SN-03	TRIO	BMP4,MAPK8,PAK1,SMAD1,TRIO	0.88
ALL	1043	JNK Inhibitor VIII	targeted	JNK	JNK and p38 signaling	SN-04	LTBR,TP53	KLRC1,LTBR,PTPN11,S100A4,TP53,TRAF3,UBE2I	0.88
ALL	1043	JNK Inhibitor VIII	targeted	JNK	JNK and p38 signaling	SN-05	BCL11B	BCL11B,GSK3B,LRP6,NOTCH1,SMAD1	0.83
ALL	1043	JNK Inhibitor VIII	targeted	JNK	JNK and p38 signaling	SN-06	KALRN	B2M,GPR65,KALRN,KLRC1,SAA1,XCR1	0.83
ALL	1043	JNK Inhibitor VIII	targeted	JNK	JNK and p38 signaling	SN-07	OBSCN	MYH10,OBSCN,ROCK1	0.83
ALL	1043	JNK Inhibitor VIII	targeted	JNK	JNK and p38 signaling	SN-08	FBN2	ACVR2B,FBN2,FURIN,NODAL,SMAD1,TIMP2	0.88
ALL	1043	JNK Inhibitor VIII	targeted	JNK	JNK and p38 signaling	SN-09	MBD6	CCL5,EXOSC8,IL8,MBD6,TES,VASP	0.83
ALL	1043	JNK Inhibitor VIII	targeted	JNK	JNK and p38 signaling	SN-10	DNAH9	DNAH9,DYNLL1,GLI3,MYH10,PAX6,SMAD1,UBC	0.83
ALL	1043	JNK Inhibitor VIII	targeted	JNK	JNK and p38 signaling	SN-11	DUOX2	ALOX15,ALOX5AP,CYBA,CYP1A2,DECR1,DUOX2,XDH	0.88
ALL	1043	JNK Inhibitor VIII	targeted	JNK	JNK and p38 signaling	SN-12	USH2A	NGFRAP1,NINL,TCEAL4,TUBA1A,UBC,USH2A,YWHAE	0.88
ALL	1043	JNK Inhibitor VIII	targeted	JNK	JNK and p38 signaling	SN-13	ALKBH7	ALKBH1,ALKBH7,ALKBH8,MYH10,TCEAL4,TRMT112,UBC	0.88
ALL	1043	JNK Inhibitor VIII	targeted	JNK	JNK and p38 signaling	SN-14	LAG3	B2M,CD8A,KLRC1,KLRK1,LAG3,TYROBP,ZAP70	0.88
ALL	1043	JNK Inhibitor VIII	targeted	JNK	JNK and p38 signaling	SN-15	CELSR1	CELSR1,DVL1,LRP6,SMAD1,UBC,VANGL1,VANGL2	0.83
ALL	1043	JNK Inhibitor VIII	targeted	JNK	JNK and p38 signaling	SN-16	LHX5	BMP4,LHX5,LRP6,SFRP5,SMAD1,WNT5A,WNT8A	0.83
ALL	1043	JNK Inhibitor VIII	targeted	JNK	JNK and p38 signaling	SN-17	CPSF1	ABCC1,ALOX5AP,CPSF1,CPSF3,UBC	0.88
ALL	1043	JNK Inhibitor VIII	targeted	JNK	JNK and p38 signaling	SN-18	CXADR	AMICA1,CXADR,ITGA4,MYH10,RHOA	0.88
ALL	1043	JNK Inhibitor VIII	targeted	JNK	JNK and p38 signaling	SN-19	EGFR,TRPV3	EGFR,KLRC1,PTPN11,TRPA1,TRPM8,TRPV1,TRPV3	0.88
ALL	1043	JNK Inhibitor VIII	targeted	JNK	JNK and p38 signaling	SN-20	NID2	MMP15,NID1,NID2,SMAD1,TGFB3,TIMP1,TIMP2	0.88
ALL	1043	JNK Inhibitor VIII	targeted	JNK	JNK and p38 signaling	SN-21	NEB	MYH10,MYH9,MYL2,NEB,PLEK,S100A4,TTN	0.92
ALL	1043	JNK Inhibitor VIII	targeted	JNK	JNK and p38 signaling	SN-22	LTBP1	B2M,CSK,FN1,KLRC1,LTBP1,SMAD1,TGFB1	0.88
ALL	1043	JNK Inhibitor VIII	targeted	JNK	JNK and p38 signaling	SN-23	HMCN1	HMCN1,KLRC1,PTPN11,SIRPA,SIRPG,SMAD1,UBC	0.88
ALL	1043	JNK Inhibitor VIII	targeted	JNK	JNK and p38 signaling	SN-24	SHANK2	B2M,DNM2,KLRC1,MYH10,MYH14,SHANK2,VAV1	0.88
ALL	1043	JNK Inhibitor VIII	targeted	JNK	JNK and p38 signaling	SN-25	HERC1,TP53	DNTT,HERC1,S100A4,TCEAL4,TP53,UBC,XRCC6	0.88
ALL	1043	JNK Inhibitor VIII	targeted	JNK	JNK and p38 signaling	SN-26	SHANK2	CAMK2D,DLG4,MAPK1,SHANK2,SMAD1	0.88
ALL	1043	JNK Inhibitor VIII	targeted	JNK	JNK and p38 signaling	SN-27	CRTC1,TP53	CRTC1,EP300,MMP1,S100A4,SMAD1,TIMP1,TP53	0.88
ALL	1043	JNK Inhibitor VIII	targeted	JNK	JNK and p38 signaling	SN-28	TLN2	CDH1,ITGB1,S100A4,SMAD1,TLN2,UBC,VCL	0.88
ALL	1043	JNK Inhibitor VIII	targeted	JNK	JNK and p38 signaling	SN-29	CDC42BPA	CDC42,CDC42BPA,KLRK1,MYH10,MYL2,TYROBP,VAV2	0.88
ALL	1043	JNK Inhibitor VIII	targeted	JNK	JNK and p38 signaling	SN-30	SRRM2	MAGOH,MYH10,S100A4,SNRPF,SRRM1,SRRM2,TAGLN2	0.88
ALL	1043	JNK Inhibitor VIII	targeted	JNK	JNK and p38 signaling	SN-31	TRPV3	TCEAL4,TES,TRPM8,TRPV3,UBC,USP10,ZNF259	0.88
ALL	1043	JNK Inhibitor VIII	targeted	JNK	JNK and p38 signaling	SN-32	LAMA3	KLRC1,LAMA3,MYH10,PTPN11,RHOA,SDC2,UTRN	0.88
ALL	1043	JNK Inhibitor VIII	targeted	JNK	JNK and p38 signaling	SN-33	MYCBP2	FBXO45,MYCBP2,S100A4,SKP1,SMAD1,SUGT1,UBE2D1	0.88
ALL	1043	JNK Inhibitor VIII	targeted	JNK	JNK and p38 signaling	SN-34	ZNF423	EBF1,LRP6,NFKB1,SMAD1,TGFB1,WNT10B,ZNF423	0.88
ALL	1046	681640	targeted	WEE1, CHEK1	cell cycle	SN-01	HERC1	ASNS,HERC1,SYK,UBC	0.92
ALL	1046	681640	targeted	WEE1, CHEK1	cell cycle	SN-02	KALRN	GPR65,KALRN,SYK,VAV2	0.96
ALL	1046	681640	targeted	WEE1, CHEK1	cell cycle	SN-03	PRPF8	LCK,PRPF8,TCEAL1,TCEAL4,UBC	0.88
ALL	1046	681640	targeted	WEE1, CHEK1	cell cycle	SN-04	MYH2	ASNS,IARS,INS,MYH2,MYO5A,TCIRG1	0.92
ALL	1046	681640	targeted	WEE1, CHEK1	cell cycle	SN-05	TP53	S100A4,TNFRSF10A,TP53	0.92
ALL	1046	681640	targeted	WEE1, CHEK1	cell cycle	SN-06	RAD54L	ASNS,NFKB1,PARP1,RAD54L,RECQL,TNFRSF10A,UBC	0.88
ALL	1046	681640	targeted	WEE1, CHEK1	cell cycle	SN-07	DUOX2	ASNS,ATF4,DECR1,DUOX2,HMOX1,SYK,TLR4	0.88
ALL	1046	681640	targeted	WEE1, CHEK1	cell cycle	SN-08	USH2A	HSP90AA1,LCK,NGFRAP1,NINL,USH2A,YWHAE	0.92
ALL	1046	681640	targeted	WEE1, CHEK1	cell cycle	SN-09	RYR1	CAV3,LCK,RYR1,SRC,TRAT1	0.92
ALL	1046	681640	targeted	WEE1, CHEK1	cell cycle	SN-10	SHANK2	ASNS,INSR,SGK1,SHANK2,SLC9A3,TCIRG1,UBC	0.92
ALL	1046	681640	targeted	WEE1, CHEK1	cell cycle	SN-11	COL14A1	COL14A1,MMP9,NFKB1,SYK	0.92
ALL	1046	681640	targeted	WEE1, CHEK1	cell cycle	SN-12	RYR3	FKBP1A,PLCG2,PPP3CA,RYR3,SYK	0.92
ALL	1046	681640	targeted	WEE1, CHEK1	cell cycle	SN-13	HMCN1	HMCN1,SIRPG,SYK,TSPO,VWF	0.96
ALL	1046	681640	targeted	WEE1, CHEK1	cell cycle	SN-14	ABCA7	ABCA7,APOA1,SP1,SYK,TCIRG1,TF	0.92
ALL	1046	681640	targeted	WEE1, CHEK1	cell cycle	SN-15	TRPV3	ASNS,TRPA1,TRPM8,TRPV3,UBC,USP10,VAMP8	0.96
ALL	1046	681640	targeted	WEE1, CHEK1	cell cycle	SN-16	CXADR	AMICA1,CXADR,ITGA4,LCK,PXN	0.88
ALL	1046	681640	targeted	WEE1, CHEK1	cell cycle	SN-17	ALKBH7	ALKBH1,ALKBH7,ALKBH8,SYK,TRMT112,UBC,VAMP8	0.88
ALL	1046	681640	targeted	WEE1, CHEK1	cell cycle	SN-18	SIN3B	LCK,SIN3B,SYK,TRAT1,UBC,UBE3A,ZBTB16	0.88
ALL	1046	681640	targeted	WEE1, CHEK1	cell cycle	SN-19	LHX5	ASNS,LHX5,LRP6,SFRP5,UBC,WNT10A,WNT7A	0.88
ALL	1046	681640	targeted	WEE1, CHEK1	cell cycle	SN-20	DNAH9	ASNS,DNAH9,DYNLL1,DYNLL2,NGFRAP1,UBC,YWHAE	0.88
ALL	1046	681640	targeted	WEE1, CHEK1	cell cycle	SN-21	BCL11B	ASNS,BCL11B,HDAC1,HES1,LCK,NOTCH1,UBC	0.88
ALL	1046	681640	targeted	WEE1, CHEK1	cell cycle	SN-22	FBN2	ASNS,FBN2,FURIN,MFAP2,TGFB1,TIMP2,UBC	0.92
ALL	1046	681640	targeted	WEE1, CHEK1	cell cycle	SN-23	LRP1	APP,ASNS,GPR65,LRP1,SRC,TRAT1,UBC	0.92
ALL	1046	681640	targeted	WEE1, CHEK1	cell cycle	SN-24	NID2	LCK,MAPK9,MMP1,NID1,NID2,SYK,TIMP2	0.92
ALL	1046	681640	targeted	WEE1, CHEK1	cell cycle	SN-25	DNAH8	ASNS,DCTN1,DNAH8,RAN,RGPD1,TPR,UBC	0.92
ALL	1046	681640	targeted	WEE1, CHEK1	cell cycle	SN-26	LTBP1	FN1,ITGA4,LTBP1,SYK	0.92
ALL	1046	681640	targeted	WEE1, CHEK1	cell cycle	SN-27	OBSCN	NCKAP1,OBSCN,RAC3,SYK	0.92
ALL	1046	681640	targeted	WEE1, CHEK1	cell cycle	SN-28	TRPV3	SRC,SYK,TRAT1,TRPM8,TRPV1,TRPV3,ZYX	0.92
ALL	1046	681640	targeted	WEE1, CHEK1	cell cycle	SN-29	CDK12	ADSS,ASNS,CDK12,GMPS,POLR1B,SUPT5H,TCEAL1	0.92
ALL	1046	681640	targeted	WEE1, CHEK1	cell cycle	SN-30	RYR3	ACVR2B,ASNS,FKBP1A,RYR3,SMAD1,UBC,YY1	0.92
ALL	1046	681640	targeted	WEE1, CHEK1	cell cycle	SN-31	CELSR1	CELSR1,LCK,MAPK8,ROR2,SYK,TNFRSF10A,VANGL2	0.92
ALL	1046	681640	targeted	WEE1, CHEK1	cell cycle	SN-32	CRTC1	CRTC1,FXYD2,JUN,SYK	0.88
ALL	1047	Nutlin-3a	targeted	MDM2	p53 pathway	SN-01	SMC4	BEX1,CD3D,SMC4,TRAF6,UBC	0.79
ALL	1047	Nutlin-3a	targeted	MDM2	p53 pathway	SN-02	PCNT	BEX1,NGFR,PCNT,TUBG2,YWHAE	0.79
ALL	1047	Nutlin-3a	targeted	MDM2	p53 pathway	SN-03	MUC4	B3GNT2,GALNT3,MUC4,ST6GAL1	0.96
ALL	1047	Nutlin-3a	targeted	MDM2	p53 pathway	SN-04	OBSCN	BEX1,CHN1,NGF,OBSCN,PRKCZ,TRIP10	0.92
ALL	1047	Nutlin-3a	targeted	MDM2	p53 pathway	SN-05	ARID1A	ARID1A,IFITM2,IRF4	0.83
ALL	1047	Nutlin-3a	targeted	MDM2	p53 pathway	SN-06	NID2	B4GALT7,CD74,CTSS,HSPG2,NID2,VCAN,XYLT1	0.79
ALL	1047	Nutlin-3a	targeted	MDM2	p53 pathway	SN-07	BCL11B	BCL11B,CD3D,LCK,NOTCH1	0.79
ALL	1047	Nutlin-3a	targeted	MDM2	p53 pathway	SN-08	USH2A	BEX1,NGF,NGFRAP1,NINL,TSC1,USH2A,YWHAG	0.79
ALL	1047	Nutlin-3a	targeted	MDM2	p53 pathway	SN-09	RYR3	BEX1,FKBP1A,PRKCZ,RIPK2,RYR3,TFDP2,YY1	0.75
ALL	1047	Nutlin-3a	targeted	MDM2	p53 pathway	SN-10	SIN3B,TP53	BEX1,ESR1,NGFR,POU4F1,SIN3B,TP53,UBE3A	0.75
ALL	1047	Nutlin-3a	targeted	MDM2	p53 pathway	SN-11	SHANK2	BIN1,CD74,DNM2,SHANK2	0.75
ALL	1047	Nutlin-3a	targeted	MDM2	p53 pathway	SN-12	LHX5	BEX1,LHX5,MAP3K7,RYK,SFRP5,TRAF6,WNT1	0.75
ALL	1047	Nutlin-3a	targeted	MDM2	p53 pathway	SN-13	ABCA7	ABCA7,APOA1,B4GALT7,SDC1,TCIRG1,TF,XYLT1	0.79
ALL	1047	Nutlin-3a	targeted	MDM2	p53 pathway	SN-14	FBN2	BEX1,CD3D,FBN2,FURIN,IL2,NGF,TGFB1	0.79
ALL	1047	Nutlin-3a	targeted	MDM2	p53 pathway	SN-15	ALKBH7	ALKBH1,ALKBH7,ALKBH8,BEX1,NGFR,TRMT112,UBC	0.79
ALL	1047	Nutlin-3a	targeted	MDM2	p53 pathway	SN-16	MYCBP2	BEX1,GSPT2,MYCBP2,NGF,RAE1,UBC,UPF3B	0.79
ALL	1047	Nutlin-3a	targeted	MDM2	p53 pathway	SN-17	BCL11B	BCL11B,BEX1,NOTCH1,SATB2,TFDP2,TRAF6,UBB	0.79
ALL	1047	Nutlin-3a	targeted	MDM2	p53 pathway	SN-18	KALRN	CD3D,CHN1,KALRN,VAV1	0.75
ALL	1047	Nutlin-3a	targeted	MDM2	p53 pathway	SN-19	DNAH9	BEX1,DNAH9,DYNLL1,NGFRAP1,RIPK2,UBC,YWHAE	0.79
ALL	1047	Nutlin-3a	targeted	MDM2	p53 pathway	SN-20	TLN2	BEX1,CD3D,ITGB2,NGFR,RHOA,TLN2,VAV1	0.79
ALL	1047	Nutlin-3a	targeted	MDM2	p53 pathway	SN-21	DUOX2	BEX1,CHN1,DECR1,DUOX2,RAC2,TLR4,TRAF6	0.79
ALL	1047	Nutlin-3a	targeted	MDM2	p53 pathway	SN-22	MBD6	BEX1,EXOSC8,KHSRP,MAPK14,MBD6,TNPO1,TRAF6	0.75
ALL	1047	Nutlin-3a	targeted	MDM2	p53 pathway	SN-23	TRPV3	BEX1,NGF,TRPM8,TRPV3,UBB,USP10,USP15	0.75
ALL	1047	Nutlin-3a	targeted	MDM2	p53 pathway	SN-24	CELSR1	BEX1,CELSR1,DVL2,NGFR,RYK,UBB,VANGL2	0.79
ALL	1047	Nutlin-3a	targeted	MDM2	p53 pathway	SN-25	DNAH6	BEX1,DNAH1,DNAH6,NGF,NTRK1,PAFAH1B1,TUBG2	0.75
ALL	1047	Nutlin-3a	targeted	MDM2	p53 pathway	SN-26	CXADR	AMICA1,BEX1,CXADR,ITGB1,NGFR,RAC1,ZBTB17	0.75
ALL	1047	Nutlin-3a	targeted	MDM2	p53 pathway	SN-27	HMCN1	CD3D,HMCN1,PLCG1,SIRPG,VEGFA	0.75
ALL	1047	Nutlin-3a	targeted	MDM2	p53 pathway	SN-28	PCNT	CD3D,NGFRAP1,PAG1,PCNT,PRKAR2B,PXN,YWHAE	0.79
ALL	1047	Nutlin-3a	targeted	MDM2	p53 pathway	SN-29	CPSF1	BEX1,CPSF1,CYCS,MPST,NGFR,WDR33,WDR82	0.75
ALL	1047	Nutlin-3a	targeted	MDM2	p53 pathway	SN-30	LRP1	CD3D,JUP,LRP1,SRC,TRAT1	0.75
ALL	1047	Nutlin-3a	targeted	MDM2	p53 pathway	SN-31	CDC42BPA	CD3D,CD3G,CDC42,CDC42BPA,DOCK10,YES1	0.75
ALL	1047	Nutlin-3a	targeted	MDM2	p53 pathway	SN-32	CDK12	BEX1,CDK12,IFITM2,IRF5,POLR2A,SUPT5H,TRAF6	0.75
ALL	1047	Nutlin-3a	targeted	MDM2	p53 pathway	SN-33	SNX33	BEX1,BIN1,DNM1,NGF,SNX30,SNX33,SNX9	0.75
ALL	1047	Nutlin-3a	targeted	MDM2	p53 pathway	SN-34	LAG3	CD3D,CD8A,LAG3,LYN,PAG1,TSPO,ZAP70	0.79
ALL	1047	Nutlin-3a	targeted	MDM2	p53 pathway	SN-35	COL14A1	B4GALT7,BEX1,COL14A1,DCN,MMP7,NGF,XYLT1	0.79
ALL	1047	Nutlin-3a	targeted	MDM2	p53 pathway	SN-36	LTBP1	BEX1,LTBP1,PRKCZ,TGFB1,TRAF6,TSPO,VWF	0.79
ALL	1047	Nutlin-3a	targeted	MDM2	p53 pathway	SN-37	MUC4	CD3D,LCK,LYN,MUC1,MUC4,ST6GAL1,ST6GALNAC4	0.79
ALL	1047	Nutlin-3a	targeted	MDM2	p53 pathway	SN-38	RAD54L,TP53	BEX1,IRS1,NGF,RAD51,RAD54L,S100A6,TP53	0.79
ALL	1047	Nutlin-3a	targeted	MDM2	p53 pathway	SN-39	TRPV3	CD3D,FOS,MMP1,TRPM8,TRPV1,TRPV3,TSPO	0.75
ALL	1047	Nutlin-3a	targeted	MDM2	p53 pathway	SN-40	ZNF423	BEX1,EBF1,LYL1,NFKB1,NGFR,TCF3,ZNF423	0.79
ALL	1049	PD-173074	targeted	FGFR1, FGFR3	RTK signaling	SN-01	SMC4	SMC4,SYK,UBC,VAMP8	0.75
ALL	1049	PD-173074	targeted	FGFR1, FGFR3	RTK signaling	SN-02	TP53	FOS,SYK,TP53,TSPO	0.79
ALL	1049	PD-173074	targeted	FGFR1, FGFR3	RTK signaling	SN-03	KALRN	KALRN,RHOQ,SYK,VAV2	0.75
ALL	1049	PD-173074	targeted	FGFR1, FGFR3	RTK signaling	SN-04	OBSCN	OBSCN,RHOA,RHOQ,SNAP23,SYDE2,SYK,VAMP8	0.75
ALL	1049	PD-173074	targeted	FGFR1, FGFR3	RTK signaling	SN-05	COL14A1	COL14A1,COL2A1,ITGA2B,SYK	0.75
ALL	1049	PD-173074	targeted	FGFR1, FGFR3	RTK signaling	SN-06	PCNT	CD2,PCNT,PRKAR2B,SYK	0.79
ALL	1049	PD-173074	targeted	FGFR1, FGFR3	RTK signaling	SN-07	PCNT	CDK1,LYN,PCNT,SYK,VAMP2,VAMP8,YWHAG	0.75
ALL	1049	PD-173074	targeted	FGFR1, FGFR3	RTK signaling	SN-08	MYCBP2	GCK,INS,MYCBP2,RAE1,SYK,TSPO,UBC	0.75
ALL	1049	PD-173074	targeted	FGFR1, FGFR3	RTK signaling	SN-09	FBN2	FBN2,FURIN,SPP1,SYK	0.75
ALL	1049	PD-173074	targeted	FGFR1, FGFR3	RTK signaling	SN-10	RYR3	FKBP1A,PLCG2,PPP3CA,RYR3,SYK	0.71
ALL	1049	PD-173074	targeted	FGFR1, FGFR3	RTK signaling	SN-11	CXADR	AMICA1,CXADR,ITGB1,SHC1,SYK,VLDLR	0.71
ALL	1049	PD-173074	targeted	FGFR1, FGFR3	RTK signaling	SN-12	MBD6	EXOSC8,KHSRP,MAPK14,MBD6,SYK	0.71
ALL	1049	PD-173074	targeted	FGFR1, FGFR3	RTK signaling	SN-13	DUOX2	DECR1,DUOX2,RAC2,SYK	0.71
ALL	1049	PD-173074	targeted	FGFR1, FGFR3	RTK signaling	SN-14	CDK12	CDK12,MAPK11,MEF2C,POLR2A,SYK	0.71
ALL	1049	PD-173074	targeted	FGFR1, FGFR3	RTK signaling	SN-15	LTBP1	FN1,LTBP1,SRGN,SYK	0.67
ALL	1049	PD-173074	targeted	FGFR1, FGFR3	RTK signaling	SN-16	ZNF423	EBF1,NFKB1,SYK,ZNF423	0.79
ALL	1049	PD-173074	targeted	FGFR1, FGFR3	RTK signaling	SN-17	ABCA7	ABCA7,APOA1,SP1,SYK	0.71
ALL	1049	PD-173074	targeted	FGFR1, FGFR3	RTK signaling	SN-18	TRPV3	SRC,SYK,TRPM8,TRPV1,TRPV3	0.71
ALL	1049	PD-173074	targeted	FGFR1, FGFR3	RTK signaling	SN-19	ESPL1	ESPL1,NCKAP1,PSMA7,SNAP29,SYK,VAMP8,ZWINT	0.71
ALL	1049	PD-173074	targeted	FGFR1, FGFR3	RTK signaling	SN-20	TLN2	SYK,TLN2,VCL,YES1	0.67
ALL	1049	PD-173074	targeted	FGFR1, FGFR3	RTK signaling	SN-21	CPSF1	CPSF1,CSTF3,GTF2F1,RELA,SYK	0.62
ALL	1049	PD-173074	targeted	FGFR1, FGFR3	RTK signaling	SN-22	USH2A	CBL,SYK,TAX1BP3,UBE2D2,USH1C,USH2A	0.62
ALL	1049	PD-173074	targeted	FGFR1, FGFR3	RTK signaling	SN-23	RYR1	ASPH,JUN,RYR1,SYK	0.67
ALL	1049	PD-173074	targeted	FGFR1, FGFR3	RTK signaling	SN-24	ALKBH7	ALKBH1,ALKBH7,ALKBH8,N6AMT1,SYK,TRMT112,UBC	0.62
ALL	1049	PD-173074	targeted	FGFR1, FGFR3	RTK signaling	SN-25	COL14A1	COL14A1,MMP1,MMP9,NCF4,NCKAP1,RAC3,SYK	0.67
ALL	1049	PD-173074	targeted	FGFR1, FGFR3	RTK signaling	SN-26	LAG3	CD8A,LAG3,PLCG2,SYK,TRAT1,TSPO,ZAP70	0.67
ALL	1049	PD-173074	targeted	FGFR1, FGFR3	RTK signaling	SN-27	LHX5	LHX5,SFRP5,SYK,WNT5A,WNT5B,WNT7B,YES1	0.67
ALL	1049	PD-173074	targeted	FGFR1, FGFR3	RTK signaling	SN-28	BCL11B	BCL11B,LCK,NOTCH1,SYK	0.67
ALL	1049	PD-173074	targeted	FGFR1, FGFR3	RTK signaling	SN-29	LAMA3	CD151,LAMA3,SRC,TRAT1,UBC,VAMP8,YOD1	0.62
ALL	1050	ZM-447439	targeted	AURKB	mitosis	SN-01	TP53	CD96,PVR,SRC,STAT5A,TP53	0.83
ALL	1050	ZM-447439	targeted	AURKB	mitosis	SN-02	LAG3	CD8A,ITGAL,LAG3,PTPRC,SELL,STAT5A	0.62
ALL	1050	ZM-447439	targeted	AURKB	mitosis	SN-03	KALRN	GNA15,KALRN,SLC9A3R1,XCL1	0.75
ALL	1050	ZM-447439	targeted	AURKB	mitosis	SN-04	FBN2	CD96,FBLN5,FBN1,FBN2,ITGAV,MFAP4,PVR	0.67
ALL	1050	ZM-447439	targeted	AURKB	mitosis	SN-05	SIN3B	CDKN1A,SIN3B,SMAD3,TGIF1	0.67
ALL	1050	ZM-447439	targeted	AURKB	mitosis	SN-06	COL14A1	CD96,COL14A1,COL4A1,ITGB3,MMP9,PVR,TIMP2	0.67
ALL	1050	ZM-447439	targeted	AURKB	mitosis	SN-07	CPSF1	CDKN1A,CPSF1,CPSF2,MDM2,RBBP6	0.62
ALL	1050	ZM-447439	targeted	AURKB	mitosis	SN-08	DNAH8	CD96,DNAH8,DYNLT1,MYCN,NTRK1,PAFAH1B1,PVR	0.67
ALL	1050	ZM-447439	targeted	AURKB	mitosis	SN-09	SNX33	CDKN1A,SNX33,SNX9,UBC,VPS37B	0.62
ALL	1050	ZM-447439	targeted	AURKB	mitosis	SN-10	TLN2	CD226,CD96,ITGB2,PVR,SPON2,TLN2,VCL	0.67
ALL	1050	ZM-447439	targeted	AURKB	mitosis	SN-11	CELSR1	CD3D,CELSR1,FZD6,GNG2,PTPRC	0.79
ALL	1050	ZM-447439	targeted	AURKB	mitosis	SN-12	CDC42BPA	ACTN2,CDC42BPA,CSK,MYL2,PTPRC	0.79
ALL	1050	ZM-447439	targeted	AURKB	mitosis	SN-13	LHX5	LHX5,LIN28B,MYC,SFRP5,WNT5A,WT1	0.79
ALL	1050	ZM-447439	targeted	AURKB	mitosis	SN-14	CDC42BPA,LAMA3	CDC42,CDC42BPA,CDKN1A,LAMA3	0.75
ALL	1050	ZM-447439	targeted	AURKB	mitosis	SN-15	CXADR	AMICA1,CXADR,ITGB1,PTPRC	0.67
ALL	1050	ZM-447439	targeted	AURKB	mitosis	SN-16	NID2	ELANE,MMP9,NID1,NID2,PTPRC,SPI1	0.75
ALL	1050	ZM-447439	targeted	AURKB	mitosis	SN-17	DUOX2,EGFR	CD96,DECR1,DUOX2,DUOXA1,EGFR,PVR,VTN	0.75
ALL	1050	ZM-447439	targeted	AURKB	mitosis	SN-18	ALKBH7	ALKBH1,ALKBH7,ALKBH8,CDKN1A,TRMT112,UBC,ZWINT	0.75
ALL	1050	ZM-447439	targeted	AURKB	mitosis	SN-19	RYR3	CD96,FKBP1A,PARD3,PVR,PVRL1,RYR3,TGFBR3	0.75
ALL	1050	ZM-447439	targeted	AURKB	mitosis	SN-20	TRPV3	MME,TAC1,TRPM8,TRPV1,TRPV3	0.75
ALL	1050	ZM-447439	targeted	AURKB	mitosis	SN-21	HMCN1	CD47,HMCN1,ITGA2B,SIRPG,STAT5A	0.79
ALL	1050	ZM-447439	targeted	AURKB	mitosis	SN-22	SRRM2	CTNNB1,KRT1,MAGOH,SLC9A3R1,SRRM2	0.79
ALL	1050	ZM-447439	targeted	AURKB	mitosis	SN-23	LHX5	CSK,CTNNB1,LHX5,PTPRC,SFRP5,WNT7B,ZYX	0.79
ALL	1050	ZM-447439	targeted	AURKB	mitosis	SN-24	CRTC1	CRTC1,FOS,MAFG,MMP1,NFE2,STAT5A	0.79
ALL	1050	ZM-447439	targeted	AURKB	mitosis	SN-25	BCL11B	BCL11B,CDKN1A,HDAC2,STAT5A	0.79
ALL	1050	ZM-447439	targeted	AURKB	mitosis	SN-26	RYR1	ASPH,CDKN1A,HIF1A,RYR1	0.79
ALL	1050	ZM-447439	targeted	AURKB	mitosis	SN-27	USH2A	CDK1,CDKN1A,NINL,USH2A	0.75
ALL	1050	ZM-447439	targeted	AURKB	mitosis	SN-28	PRPF8	CPSF2,MFAP1,MFAP4,PRPF8	0.71
ALL	1050	ZM-447439	targeted	AURKB	mitosis	SN-29	TRIO	CD5,GNA15,MME,TAC1,TRIO,UTS2R,XCL1	0.71
ALL	1050	ZM-447439	targeted	AURKB	mitosis	SN-30	ERCC6,TP53	CDKN1A,ERCC6,TP53,WT1	0.75
ALL	1050	ZM-447439	targeted	AURKB	mitosis	SN-31	ZNF423	CDKN1A,EBF1,PTPRC,SPI1,TGFB1,WNT10B,ZNF423	0.79
ALL	1050	ZM-447439	targeted	AURKB	mitosis	SN-32	MBD6	EXOSC8,GNA15,IL8,MBD6,NFKB1	0.79
ALL	1050	ZM-447439	targeted	AURKB	mitosis	SN-33	DUOX2	CYB5A,CYP1A2,DECR1,DUOX2,PRKCB,STAT5A,XDH	0.79
ALL	1050	ZM-447439	targeted	AURKB	mitosis	SN-34	MUC4	CDKN1A,ERBB2,GALNT6,MUC4	0.75
ALL	1050	ZM-447439	targeted	AURKB	mitosis	SN-35	PYGM	CDKN1A,LIN28B,MAX,PFKM,PYGM	0.75
ALL	1053	MK-2206	targeted	AKT1, AKT2	PI3K signaling	SN-01	EGFR	EGFR,HOXA10,PIK3CG,PTPN6	0.75
ALL	1053	MK-2206	targeted	AKT1, AKT2	PI3K signaling	SN-02	SIN3B	GLI3,SIN3B,ZBTB16	0.92
ALL	1053	MK-2206	targeted	AKT1, AKT2	PI3K signaling	SN-03	TP53	CAT,HOXA10,SIRT2,TP53	0.83
ALL	1053	MK-2206	targeted	AKT1, AKT2	PI3K signaling	SN-04	CRTC1	CREB1,CRTC1,HOXA10,MEF2C,MEIS1	0.88
ALL	1053	MK-2206	targeted	AKT1, AKT2	PI3K signaling	SN-05	LAG3	CD8A,HOXA10,KLRK1,LAG3,LCP2,PTPN6,TYROBP	0.71
ALL	1053	MK-2206	targeted	AKT1, AKT2	PI3K signaling	SN-06	SMC4	CCNB1,HOXA10,MEIS1,S100A10,SMC4,STAT5A,UBC	0.83
ALL	1053	MK-2206	targeted	AKT1, AKT2	PI3K signaling	SN-07	SHANK2	CAMK2D,DLG4,HOXA10,MEF2C,PTPN6,SHANK2,SRC	0.75
ALL	1053	MK-2206	targeted	AKT1, AKT2	PI3K signaling	SN-08	HMCN1	HMCN1,HOXA10,HOXA9,MEIS1,PTPN6,SIRPA,SIRPG	0.75
ALL	1053	MK-2206	targeted	AKT1, AKT2	PI3K signaling	SN-09	CDC42BPA	CDC42,CDC42BPA,HOXA10,MEF2C,PIK3CG,PTPN11,YES1	0.71
ALL	1053	MK-2206	targeted	AKT1, AKT2	PI3K signaling	SN-10	CELSR1	CELSR1,CTHRC1,DVL3,KLRK1,RAC1,TYROBP,VANGL2	0.67
ALL	1053	MK-2206	targeted	AKT1, AKT2	PI3K signaling	SN-11	PFKFB2	AKT1,KLRK1,PFKFB2,PIK3R1,S100A10,TYROBP,UBC	0.75
ALL	1053	MK-2206	targeted	AKT1, AKT2	PI3K signaling	SN-12	DNAH6	CDC42,CLIP1,DNAH6,KLRK1,PIK3CG,TYROBP,VAV2	0.71
ALL	1053	MK-2206	targeted	AKT1, AKT2	PI3K signaling	SN-13	NID2	HOXA10,HSPG2,NID2,PBX1,PRL,TAPBPL	0.62
ALL	1053	MK-2206	targeted	AKT1, AKT2	PI3K signaling	SN-14	DNAH8	DNAH8,DYNC1H1,GLI3,PRKACA	0.71
ALL	1053	MK-2206	targeted	AKT1, AKT2	PI3K signaling	SN-15	PRPF8,TP53	CAT,KLRK1,PIK3CA,PRPF8,TP53,TYROBP,YBX1	0.67
ALL	1053	MK-2206	targeted	AKT1, AKT2	PI3K signaling	SN-16	CDK12	CCNK,CDK12,CDK2,GLI1,GLI3	0.75
ALL	1053	MK-2206	targeted	AKT1, AKT2	PI3K signaling	SN-17	CPSF1	CPSF1,CPSF6,FYN,HNRNPK,KLRK1,PTPRC,TYROBP	0.67
ALL	1053	MK-2206	targeted	AKT1, AKT2	PI3K signaling	SN-18	RYR3	ACVR2B,FKBP1A,GLI3,RYR3,SMAD4	0.83
ALL	1053	MK-2206	targeted	AKT1, AKT2	PI3K signaling	SN-19	CPSF1	CPSF1,CPSF2,CREBBP,GLI3,SMARCD3	0.79
ALL	1053	MK-2206	targeted	AKT1, AKT2	PI3K signaling	SN-20	SRRM2	GLI3,HDAC2,SAP30BP,SF3A2,SRRM2	0.83
ALL	1053	MK-2206	targeted	AKT1, AKT2	PI3K signaling	SN-21	SNX33	DNM1,KLRK1,PLCG2,PPP3CB,SNX33,SNX9,TYROBP	0.75
ALL	1053	MK-2206	targeted	AKT1, AKT2	PI3K signaling	SN-22	MBD6	EXOSC8,HOXA10,IL8,MBD6,PTPN6,SSTR2,TNPO1	0.83
ALL	1053	MK-2206	targeted	AKT1, AKT2	PI3K signaling	SN-23	MBD6	EXOSC8,KLRK1,MAPK1,MBD6,SOS1,TYROBP,ZFP36	0.79
ALL	1053	MK-2206	targeted	AKT1, AKT2	PI3K signaling	SN-24	TRPV3	KLRK1,SRC,TRPM8,TRPV1,TRPV3,TYROBP,ZAP70	0.79
ALL	1053	MK-2206	targeted	AKT1, AKT2	PI3K signaling	SN-25	ALKBH7	ALKBH1,ALKBH7,ALKBH8,GLI3,SHH,TRMT112,UBC	0.79
ALL	1053	MK-2206	targeted	AKT1, AKT2	PI3K signaling	SN-26	TRPV3	CFTR,GLI3,PRKACG,TRPM8,TRPV3,USP10,WAPAL	0.75
ALL	1053	MK-2206	targeted	AKT1, AKT2	PI3K signaling	SN-27	ABCA7	ABCA7,APOA1,B2M,KLRK1,SRA1,TGS1,TYROBP	0.75
ALL	1053	MK-2206	targeted	AKT1, AKT2	PI3K signaling	SN-28	ESPL1	ESPL1,GLI3,PCGF2,RBBP7,UBE2C	0.71
ALL	1053	MK-2206	targeted	AKT1, AKT2	PI3K signaling	SN-29	LHX5	FGF8,GLI3,LHX5,SFRP5,WNT1	0.71
ALL	1053	MK-2206	targeted	AKT1, AKT2	PI3K signaling	SN-30	BCL11B	BCL11B,GLI1,GLI3,MEF2C,NOTCH1,SATB2,TBR1	0.79
ALL	1053	MK-2206	targeted	AKT1, AKT2	PI3K signaling	SN-31	RYR3	BAMBI,FKBP1A,HOXA10,HOXA11,MEIS1,RYR3,YY1	0.75
ALL	1053	MK-2206	targeted	AKT1, AKT2	PI3K signaling	SN-32	NEB	CASP6,GLI3,HOXA10,MEIS1,MYB,NEB,VIM	0.75
ALL	1053	MK-2206	targeted	AKT1, AKT2	PI3K signaling	SN-33	ERCC6	CHD4,ERCC6,GLI3,SAP30	0.75
ALL	1053	MK-2206	targeted	AKT1, AKT2	PI3K signaling	SN-34	ZNF423	EBF1,HOXA10,KLF4,MEF2C,PBX1,TCF3,ZNF423	0.67
ALL	1053	MK-2206	targeted	AKT1, AKT2	PI3K signaling	SN-35	HERC1,TP53	GLI3,HERC1,HOXA10,PTPN11,SAP30,TP53,YY1	0.67
ALL	1053	MK-2206	targeted	AKT1, AKT2	PI3K signaling	SN-36	KALRN	GLI3,GNAQ,KALRN,KLRK1,PRKACA,TYROBP,VAV3	0.71
ALL	1053	MK-2206	targeted	AKT1, AKT2	PI3K signaling	SN-37	PYGM	GLI3,GSK3B,GYS2,PIK3CG,PYGM,S100A10,UBC	0.71
ALL	1053	MK-2206	targeted	AKT1, AKT2	PI3K signaling	SN-38	CXADR	AMICA1,CXADR,HOXA10,ITGB1,PTPN11,TEK,VEGFC	0.71
ALL	1053	MK-2206	targeted	AKT1, AKT2	PI3K signaling	SN-39	MYCBP2	CREBBP,FBXO45,GLI3,MEF2C,MYCBP2,SKP1,TFDP1	0.67
ALL	1053	MK-2206	targeted	AKT1, AKT2	PI3K signaling	SN-40	RAD54L	GLI3,MEF2C,RAD52,RAD54L,SAP30,TERT,UBE2I	0.67
ALL	1053	MK-2206	targeted	AKT1, AKT2	PI3K signaling	SN-41	NEB	CAMK4,MEF2C,MYL2,NEB	0.67
ALL	1053	MK-2206	targeted	AKT1, AKT2	PI3K signaling	SN-42	ZNF423	CREBBP,CTHRC1,DVL2,EBF1,GLI3,WNT1,ZNF423	0.71
ALL	1054	PD-0332991	targeted	CDK4, CDK6	cell cycle	SN-01	TP53	SH2D1A,STAT5A,TP53,WT1	0.71
ALL	1054	PD-0332991	targeted	CDK4, CDK6	cell cycle	SN-02	BCL11B	BCL11B,CD3D,LCK,NOTCH1	0.58
ALL	1054	PD-0332991	targeted	CDK4, CDK6	cell cycle	SN-03	LAMA3	CTTN,LAMA3,MYLK	0.62
ALL	1054	PD-0332991	targeted	CDK4, CDK6	cell cycle	SN-04	SMC4	CDKN1A,ID2,RB1,SMC4	0.75
ALL	1054	PD-0332991	targeted	CDK4, CDK6	cell cycle	SN-05	LAG3	CD3D,CD8A,GRAP2,LAG3,STAT5A	0.71
ALL	1054	PD-0332991	targeted	CDK4, CDK6	cell cycle	SN-06	SRRM2	KRT1,MAGOH,RPL27A,SRRM2	0.71
ALL	1054	PD-0332991	targeted	CDK4, CDK6	cell cycle	SN-07	TLN2	CDKN1A,HIF1A,ID2,ITGB2,MYLK,TLN2,VCL	0.67
ALL	1054	PD-0332991	targeted	CDK4, CDK6	cell cycle	SN-08	PFKFB2	AKT1,CDH2,LCK,PFKFB2,WT1	0.71
ALL	1054	PD-0332991	targeted	CDK4, CDK6	cell cycle	SN-09	KALRN	GNA15,KALRN,RHOH	0.75
ALL	1054	PD-0332991	targeted	CDK4, CDK6	cell cycle	SN-10	PCNT	CSNK1E,CTNNB1,ID2,PCNT	0.75
ALL	1054	PD-0332991	targeted	CDK4, CDK6	cell cycle	SN-11	HERC1	CD3D,HERC1,RPL27A,UBC	0.75
ALL	1054	PD-0332991	targeted	CDK4, CDK6	cell cycle	SN-12	LTBP1	CDKN1A,EBF1,LTBP1,TGFB1	0.71
ALL	1054	PD-0332991	targeted	CDK4, CDK6	cell cycle	SN-13	TRIO	CD3D,PRKCQ,RHOH,TBXA2R,TRIO	0.71
ALL	1054	PD-0332991	targeted	CDK4, CDK6	cell cycle	SN-14	LRP1,TP53	CD3D,LCK,LRP1,PDGFB,THBS1,TP53,WT1	0.71
ALL	1054	PD-0332991	targeted	CDK4, CDK6	cell cycle	SN-15	LTBR	CD3D,LTBR,PTPN11,RPL27A,STAT5A,TRAF3,UBA52	0.75
ALL	1054	PD-0332991	targeted	CDK4, CDK6	cell cycle	SN-16	RYR3	BMPR2,FKBP1A,RYR3,SMAD3,TGFBR3	0.75
ALL	1054	PD-0332991	targeted	CDK4, CDK6	cell cycle	SN-17	RAD54L	ABL1,CD3D,PTPRC,RAD52,RAD54L	0.75
ALL	1054	PD-0332991	targeted	CDK4, CDK6	cell cycle	SN-18	DNAH8	BMPR2,DNAH8,DYNLT1,MYH14,MYLK,PAFAH1B1	0.75
ALL	1054	PD-0332991	targeted	CDK4, CDK6	cell cycle	SN-19	PRPF8	LSM6,PRPF8,U2AF2,WT1	0.75
ALL	1054	PD-0332991	targeted	CDK4, CDK6	cell cycle	SN-20	DUOX2	CD3D,DECR1,DUOX2,GRAP2,RAC1,RAC2,RHOH	0.75
ALL	1054	PD-0332991	targeted	CDK4, CDK6	cell cycle	SN-21	EGFR	CTNNB1,EGFR,GRAP2,LCK,TCF7,YWHAZ	0.75
ALL	1054	PD-0332991	targeted	CDK4, CDK6	cell cycle	SN-22	ZNF423	EBF1,ID2,TCF3,ZNF423	0.71
ALL	1054	PD-0332991	targeted	CDK4, CDK6	cell cycle	SN-23	DNAH9	BMPR2,CTNNB1,DNAH9,DYNLL1,DYNLT1,ID2,YWHAG	0.71
ALL	1054	PD-0332991	targeted	CDK4, CDK6	cell cycle	SN-24	COL14A1	CDH2,COL14A1,MMP9,SLIT1	0.71
ALL	1054	PD-0332991	targeted	CDK4, CDK6	cell cycle	SN-25	SNX33	ADAM15,CD3D,LCK,SNX33,SNX9,STAT5A,UBC	0.71
ALL	1054	PD-0332991	targeted	CDK4, CDK6	cell cycle	SN-26	ABCA7	ABCA7,APOA1,CREBBP,TCF7,TGS1,U2AF2,WT1	0.71
ALL	1054	PD-0332991	targeted	CDK4, CDK6	cell cycle	SN-27	CDK12,TP53	CCNK,CDK12,CDK6,CTNNB1,TCF7,TP53,WT1	0.71
ALL	1054	PD-0332991	targeted	CDK4, CDK6	cell cycle	SN-28	TRPV3	CD3D,CDH2,SRC,TRPM8,TRPV1,TRPV3,ZAP70	0.71
ALL	1054	PD-0332991	targeted	CDK4, CDK6	cell cycle	SN-29	LRP1	BLNK,CALR,CMTM7,LRP1,SHC1	0.71
ALL	1054	PD-0332991	targeted	CDK4, CDK6	cell cycle	SN-30	USH2A	CD3D,DYNLL1,GRAP2,NINL,PAK1,TUBGCP4,USH2A	0.71
ALL	1054	PD-0332991	targeted	CDK4, CDK6	cell cycle	SN-31	CDK12	CD3D,CDK12,JUN,POLR2A,SUPT5H,U2AF2,WT1	0.71
ALL	1054	PD-0332991	targeted	CDK4, CDK6	cell cycle	SN-32	HMCN1	CD3D,CD47,FYB,GRAP2,HMCN1,SIRPA,SIRPG	0.71
ALL	1054	PD-0332991	targeted	CDK4, CDK6	cell cycle	SN-33	SHANK2	CTNNB1,CTTN,DNM2,ID2,MYLK,SHANK2,TCF7	0.71
ALL	1054	PD-0332991	targeted	CDK4, CDK6	cell cycle	SN-34	USH2A	CTNNB1,NINL,PPP2R1A,RPL27A,TCF7,USH2A,YWHAG	0.71
ALL	1054	PD-0332991	targeted	CDK4, CDK6	cell cycle	SN-35	MBD6	CD3D,EXOSC8,KHSRP,LCK,MAPK11,MBD6,ZFP36	0.71
ALL	1054	PD-0332991	targeted	CDK4, CDK6	cell cycle	SN-36	MYCBP2	DDX19B,MYCBP2,RAE1,RPL27A,U2AF2,UPF3B,WT1	0.71
ALL	1054	PD-0332991	targeted	CDK4, CDK6	cell cycle	SN-37	FBN2	ARNT,CDKN1A,FBN2,FURIN,ID2,MFAP4,MFAP5	0.71
ALL	1054	PD-0332991	targeted	CDK4, CDK6	cell cycle	SN-38	RAD54L	CD3D,LCK,NFKB1,PARP1,RAD54L,RECQL,XRCC6	0.71
ALL	1054	PD-0332991	targeted	CDK4, CDK6	cell cycle	SN-39	DNMT3B	BMPR2,DNMT3B,SMAD4,SUMO1,TCF7,UBE2I,WT1	0.75
ALL	1054	PD-0332991	targeted	CDK4, CDK6	cell cycle	SN-40	ALKBH7	ALKBH1,ALKBH7,ALKBH8,KRT1,TRMT112,UBC	0.71
ALL	1054	PD-0332991	targeted	CDK4, CDK6	cell cycle	SN-41	PCNT	CD3D,CDK1,FOS,PCNT	0.71
ALL	1054	PD-0332991	targeted	CDK4, CDK6	cell cycle	SN-42	DNAH6	BLNK,CD3D,CMTM7,DCTN1,DNAH6,GRB2,UBC	0.71
ALL	1054	PD-0332991	targeted	CDK4, CDK6	cell cycle	SN-43	CXADR	AMICA1,CXADR,ITGB1,MYLK	0.71
ALL	1054	PD-0332991	targeted	CDK4, CDK6	cell cycle	SN-44	NID2,TP53	CDH2,MMP9,NID1,NID2,SMAD3,TP53,WT1	0.71
ALL	1054	PD-0332991	targeted	CDK4, CDK6	cell cycle	SN-45	CDC42BPA	BMPR2,CDC42BPA,GATA4,MYL2,MYLK,TPM2,WT1	0.75
ALL	1054	PD-0332991	targeted	CDK4, CDK6	cell cycle	SN-46	OBSCN	CD3D,LCK,MYLK,OBSCN,RAC1,TLN1,TTN	0.75
ALL	1054	PD-0332991	targeted	CDK4, CDK6	cell cycle	SN-47	LTBR	BMPR2,GRAP2,LTB,LTBR,MAP3K7,TRAF5	0.75
ALL	1054	PD-0332991	targeted	CDK4, CDK6	cell cycle	SN-48	LTBP1	FOXO1,ID2,LTBP1,MYC,TGFB1,WT1,XPO1	0.75
ALL	1054	PD-0332991	targeted	CDK4, CDK6	cell cycle	SN-49	RYR1	ARNT,ASPH,CD3D,HOMER3,ID2,JUN,RYR1	0.75
ALL	1054	PD-0332991	targeted	CDK4, CDK6	cell cycle	SN-50	RYR1	CALM1,CD3D,MYLK,ORAI1,RYR1,TRPC3,UBC	0.75
ALL	1054	PD-0332991	targeted	CDK4, CDK6	cell cycle	SN-51	BCL11B	BCL11B,CDKN1A,HDAC1,SATB2,TCF7,TLE1	0.75
ALL	1054	PD-0332991	targeted	CDK4, CDK6	cell cycle	SN-52	MUC4	CDKN1A,ERBB2,GRAP2,MUC4	0.75
ALL	1054	PD-0332991	targeted	CDK4, CDK6	cell cycle	SN-53	TRPV3	CDKN1A,PSMB1,RPL27A,TRPM8,TRPV3,UBC,USP10	0.75
ALL	1054	PD-0332991	targeted	CDK4, CDK6	cell cycle	SN-54	RAD54L	CDK4,CDKN1A,DMC1,RAD54L,SMAD3,UBE2I,WT1	0.75
ALL	1058	GDC0941	targeted	PI3K (class 1)	PI3K signaling	SN-01	EGFR	CD3D,EGFR,LCK	0.58
ALL	1058	GDC0941	targeted	PI3K (class 1)	PI3K signaling	SN-02	KALRN	CD3D,GNG2,KALRN,RHOH	0.5
ALL	1058	GDC0941	targeted	PI3K (class 1)	PI3K signaling	SN-03	TP53	CD3D,NGFRAP1,SORT1,TP53,UBC	0.5
ALL	1058	GDC0941	targeted	PI3K (class 1)	PI3K signaling	SN-04	ESPL1	CD3D,ESPL1,PLCG1,UBE2E1	0.54
ALL	1058	GDC0941	targeted	PI3K (class 1)	PI3K signaling	SN-05	TLN2	CD3D,ITGB2,TLN2,VAV1	0.5
ALL	1058	GDC0941	targeted	PI3K (class 1)	PI3K signaling	SN-06	DUOX2	CD3D,DECR1,DUOX2,PLCG1,PRKCB,RAC3,RHOH	0.5
ALL	1058	GDC0941	targeted	PI3K (class 1)	PI3K signaling	SN-07	OBSCN	CD3D,CDC42,GRAP2,OBSCN	0.5
ALL	1058	GDC0941	targeted	PI3K (class 1)	PI3K signaling	SN-08	CPSF1	CASP3,CD3D,CPSF1,NGFRAP1,PRKCQ,PTBP1,SRRM1	0.46
ALL	1058	GDC0941	targeted	PI3K (class 1)	PI3K signaling	SN-09	CDK12	CD3D,CDK12,JUN,POLR2A	0.62
ALL	1058	GDC0941	targeted	PI3K (class 1)	PI3K signaling	SN-10	PCNT	CD3D,HSP90AA1,LCK,NGFRAP1,PCNT,TUBA1A,YWHAE	0.62
ALL	1058	GDC0941	targeted	PI3K (class 1)	PI3K signaling	SN-11	MYH2	CD3D,CD3G,FCGR2A,MYH2	0.58
ALL	1058	GDC0941	targeted	PI3K (class 1)	PI3K signaling	SN-12	LHX5	CD3D,GATA3,LCK,LEF1,LHX5,SFRP5,WNT3A	0.54
ALL	1058	GDC0941	targeted	PI3K (class 1)	PI3K signaling	SN-13	ABCA7	ABCA7,ABCG1,APOA1,B2M,CD3D	0.5
ALL	1058	GDC0941	targeted	PI3K (class 1)	PI3K signaling	SN-14	LTBR	CASP2,CD3D,LTBR,NGFRAP1,PTPN11,TRAF2,TRAF3	0.54
ALL	1058	GDC0941	targeted	PI3K (class 1)	PI3K signaling	SN-15	HMCN1	CD3D,HMCN1,LCK,RHOH,SIRPG,SOS1,VWF	0.58
ALL	1058	GDC0941	targeted	PI3K (class 1)	PI3K signaling	SN-16	SNX33	ADAM15,CD3D,LCK,NDFIP2,SNX33,SNX9,UBC	0.58
ALL	1058	GDC0941	targeted	PI3K (class 1)	PI3K signaling	SN-17	CELSR1	ARHGEF7,CBL,CD3D,CELSR1,RHOH,SCRIB,VANGL2	0.62
ALL	1058	GDC0941	targeted	PI3K (class 1)	PI3K signaling	SN-18	FBN2	AKT1,CD3D,FBLN5,FBN2,LCK,MFAP2,SOD3	0.67
ALL	1058	GDC0941	targeted	PI3K (class 1)	PI3K signaling	SN-19	CXADR	AMICA1,CD3D,CXADR,ITGA4,LCK,RHOA,YWHAZ	0.62
ALL	1058	GDC0941	targeted	PI3K (class 1)	PI3K signaling	SN-20	COL14A1	CD3D,COL14A1,JUN,MMP7,MMP9,NGF,NGFRAP1	0.62
ALL	1058	GDC0941	targeted	PI3K (class 1)	PI3K signaling	SN-21	DNMT3B	CD3D,DNMT3B,EOMES,NANOG	0.5
ALL	1058	GDC0941	targeted	PI3K (class 1)	PI3K signaling	SN-22	TRPV3	CD3D,LCK,SRC,TRPM8,TRPV1,TRPV3,ZAP70	0.62
ALL	1058	GDC0941	targeted	PI3K (class 1)	PI3K signaling	SN-23	CDC42BPA	CD3D,CDC42,CDC42BPA,ITK,MAP3K5,RHOH,YES1	0.58
ALL	1058	GDC0941	targeted	PI3K (class 1)	PI3K signaling	SN-24	MBD6	CD3D,DIS3,EXOSC8,LCK,MBD6,NFKBIA,RAN	0.58
ALL	1058	GDC0941	targeted	PI3K (class 1)	PI3K signaling	SN-25	RYR1	CACNA1A,CD3D,GNB1,RYR1	0.58
ALL	1058	GDC0941	targeted	PI3K (class 1)	PI3K signaling	SN-26	PYGM	AKT1,CD3D,PFKM,PYGM,RHOC,RHOH,UBC	0.54
ALL	1058	GDC0941	targeted	PI3K (class 1)	PI3K signaling	SN-27	ALKBH7	ALKBH1,ALKBH7,ALKBH8,CD3D,TRMT11,TRMT112,UBC	0.58
ALL	1058	GDC0941	targeted	PI3K (class 1)	PI3K signaling	SN-28	ZNF423	CD3D,EBF1,LCK,RELA,TGFB1,TGFBR3,ZNF423	0.54
ALL	1058	GDC0941	targeted	PI3K (class 1)	PI3K signaling	SN-29	MUC4	CD28,CD3D,ERBB2,MUC4,PIK3CG	0.54
ALL	1058	GDC0941	targeted	PI3K (class 1)	PI3K signaling	SN-30	LTBP1	CD3D,FN1,LTBP1,SYK,VEGFC	0.5
ALL	1058	GDC0941	targeted	PI3K (class 1)	PI3K signaling	SN-31	RYR3	CD3D,FKBP1A,PLCG1,PPP3CB,RYR3,TGFBR2,TGFBR3	0.5
ALL	1058	GDC0941	targeted	PI3K (class 1)	PI3K signaling	SN-32	DNAH8	CD3D,DCTN6,DNAH8,FYB,KIF26A,VASP,WDTC1	0.54
ALL	1058	GDC0941	targeted	PI3K (class 1)	PI3K signaling	SN-33	OBSCN	CD3D,OBSCN,PLEK,RHOG,RHOH,SYK,TTN	0.5
ALL	1058	GDC0941	targeted	PI3K (class 1)	PI3K signaling	SN-34	SHANK2	CANX,CD3D,CD74,DNM2,RHOH,SHANK2,VAV1	0.5
ALL	1058	GDC0941	targeted	PI3K (class 1)	PI3K signaling	SN-35	CPSF1	CD3D,CPSF1,KIF18A,KIF26A,PPP1CC,UBC,WDR33	0.62
ALL	1058	GDC0941	targeted	PI3K (class 1)	PI3K signaling	SN-36	ERCC6	CD3D,ERCC6,IL2RG,IRF4,KAT2B	0.54
ALL	1058	GDC0941	targeted	PI3K (class 1)	PI3K signaling	SN-37	CDK12	CD3D,CDK12,CDKN1A,MAP3K5,MNAT1,SUPT5H,UBC	0.54
ALL	1058	GDC0941	targeted	PI3K (class 1)	PI3K signaling	SN-38	NID2	CD3D,CD74,CTSS,HSPG2,NID2,PLCG1,VEGFA	0.54
ALL	1059	AZD8055	targeted	MTORC1/2	TOR signaling	SN-01	PFKFB2	AKT1,CD3D,LCK,PFKFB2,TRIB3	0.75
ALL	1059	AZD8055	targeted	MTORC1/2	TOR signaling	SN-02	TLN2	CD3D,ITGB1,SHC1,TLN2,VEGFA,VEGFC	0.71
ALL	1059	AZD8055	targeted	MTORC1/2	TOR signaling	SN-03	ABCA7	ABCA7,APOA1,APP,CD74,SAR1B	0.67
ALL	1059	AZD8055	targeted	MTORC1/2	TOR signaling	SN-04	KALRN	CD3D,GNB1,KALRN,RHOH	0.71
ALL	1059	AZD8055	targeted	MTORC1/2	TOR signaling	SN-05	COL14A1	CD74,COL14A1,CTNND1,DNM2,MMP7,PTPRM	0.71
ALL	1059	AZD8055	targeted	MTORC1/2	TOR signaling	SN-06	LTBR	CD3D,LTBR,TRAF3,UBC	0.75
ALL	1059	AZD8055	targeted	MTORC1/2	TOR signaling	SN-07	TP53	CD74,CTSD,IRF4,TP53,XAF1	0.75
ALL	1059	AZD8055	targeted	MTORC1/2	TOR signaling	SN-08	DNMT3B	CD3D,DNMT3B,EOMES,NANOG	0.79
ALL	1059	AZD8055	targeted	MTORC1/2	TOR signaling	SN-09	MYH2	CD3D,CD3G,FCGR2A,MYH2	0.79
ALL	1059	AZD8055	targeted	MTORC1/2	TOR signaling	SN-10	HERC1	CCDC50,CD74,HERC1,SEC23A,UBC	0.79
ALL	1059	AZD8055	targeted	MTORC1/2	TOR signaling	SN-11	CRTC1	CD3D,CRTC1,IRF4,JUN,TRIP6	0.83
ALL	1059	AZD8055	targeted	MTORC1/2	TOR signaling	SN-12	CDC42BPA	CD3D,CD3G,CDC42,CDC42BPA,LCK,RHOH,YES1	0.75
ALL	1059	AZD8055	targeted	MTORC1/2	TOR signaling	SN-13	DNAH8	CD3D,DNAH8,NTRK1,PLCG1	0.75
ALL	1059	AZD8055	targeted	MTORC1/2	TOR signaling	SN-14	MBD6	CD3D,EXOSC8,IL2,IL8,MBD6	0.71
ALL	1059	AZD8055	targeted	MTORC1/2	TOR signaling	SN-15	LHX5	AP2M1,CD74,LHX5,SFRP5,WNT5A	0.75
ALL	1059	AZD8055	targeted	MTORC1/2	TOR signaling	SN-16	DNAH6	CD74,DNAH6,PAFAH1B1,SEC13	0.75
ALL	1059	AZD8055	targeted	MTORC1/2	TOR signaling	SN-17	USH2A	CD3D,LCK,NINL,NRAS,TUBG2,USH2A,YWHAG	0.71
ALL	1059	AZD8055	targeted	MTORC1/2	TOR signaling	SN-18	ALKBH7	ALKBH1,ALKBH7,ALKBH8,CD3D,N6AMT1,TRMT112,UBC	0.71
ALL	1059	AZD8055	targeted	MTORC1/2	TOR signaling	SN-19	ZNF423	CD3D,EBF1,LCK,NR2F2,TGFB1,VEGFC,ZNF423	0.75
ALL	1059	AZD8055	targeted	MTORC1/2	TOR signaling	SN-20	PRPF8	AP1S1,CD74,IRF4,POLR2A,PRPF8,UBC,XAB2	0.75
ALL	1059	AZD8055	targeted	MTORC1/2	TOR signaling	SN-21	LAMA3	ARHGEF7,CD3D,LAMA3,PLCG1,RHOH,SRC,VEGFA	0.67
ALL	1059	AZD8055	targeted	MTORC1/2	TOR signaling	SN-22	MUC4	CD3D,ERBB2,GRAP2,MUC4,PIK3CG	0.75
ALL	1059	AZD8055	targeted	MTORC1/2	TOR signaling	SN-23	SIN3B	CD3D,GLI1,GNAI1,SIN3B,TGIF1	0.75
ALL	1059	AZD8055	targeted	MTORC1/2	TOR signaling	SN-24	TRPV3	BUB3,CD74,PSMD2,SEC13,TRPM8,TRPV3,USP10	0.71
ALL	1059	AZD8055	targeted	MTORC1/2	TOR signaling	SN-25	NID2	APP,CD74,CTSS,HSPG2,NID2,VEGFA,VEGFC	0.83
ALL	1059	AZD8055	targeted	MTORC1/2	TOR signaling	SN-26	PYGM	APP,CD3D,GSK3B,GYS2,PYGM,UBC,VEGFC	0.83
ALL	1059	AZD8055	targeted	MTORC1/2	TOR signaling	SN-27	SNX33	AP2A1,CD74,DNM1,SNX33,SNX9	0.75
ALL	1059	AZD8055	targeted	MTORC1/2	TOR signaling	SN-28	DUOX2	CD3D,DECR1,DUOX2,IRF4,LCK,PRKCA,VCAM1	0.75
ALL	1059	AZD8055	targeted	MTORC1/2	TOR signaling	SN-29	BCL11B	BCL11B,CD3D,HDAC1,LCK,NFKBIA,NOTCH1,TLE3	0.79
ALL	1059	AZD8055	targeted	MTORC1/2	TOR signaling	SN-30	CXADR	AMICA1,ARF1,CD74,CXADR,ITGB1,RAC1,YWHAZ	0.75
ALL	1059	AZD8055	targeted	MTORC1/2	TOR signaling	SN-31	LAG3	CD3D,CD8A,LAG3,PAG1	0.75
ALL	1059	AZD8055	targeted	MTORC1/2	TOR signaling	SN-32	OBSCN	CD74,OBSCN,RHOH,ROCK2,SH3GL2	0.75
ALL	1059	AZD8055	targeted	MTORC1/2	TOR signaling	SN-33	SHANK2	CD3D,CD74,DNM2,PIK3CG,SHANK2,SRC,VAV1	0.79
ALL	1059	AZD8055	targeted	MTORC1/2	TOR signaling	SN-34	CPSF1	CANX,CD3D,CD74,CPSF1,PCF11,POLR2C,SEC61A1	0.79
ALL	1059	AZD8055	targeted	MTORC1/2	TOR signaling	SN-35	CPSF1	CD3D,CPSF1,GTF2B,IRF4,SSU72,UBC,WDR33	0.79
ALL	1059	AZD8055	targeted	MTORC1/2	TOR signaling	SN-36	MYCBP2	CD3D,CD74,MYCBP2,RAE1,RANBP2,SEC13,UBC	0.79
ALL	1059	AZD8055	targeted	MTORC1/2	TOR signaling	SN-37	CELSR1	ADAR,CD3D,CELSR1,FZD6,GNG2,IRF4,VANGL2	0.75
ALL	1059	AZD8055	targeted	MTORC1/2	TOR signaling	SN-38	LHX5	CD3D,GSK3B,LHX5,PAG1,PXN,SFRP5,WNT8A	0.75
ALL	1059	AZD8055	targeted	MTORC1/2	TOR signaling	SN-39	TRPV3	APP,SRC,TAC1,TRPM8,TRPV1,TRPV3,VEGFC	0.75
ALL	1059	AZD8055	targeted	MTORC1/2	TOR signaling	SN-40	SRRM2	AP1S1,CD3D,CD74,HSPA8,SF3A2,SRRM2,VCP	0.75
ALL	1059	AZD8055	targeted	MTORC1/2	TOR signaling	SN-41	TLN2	CD3D,CD40LG,IRF4,ITGB2,NFKBIA,TLN2,VAV1	0.75
ALL	1059	AZD8055	targeted	MTORC1/2	TOR signaling	SN-42	EGFR,MUC4	AP2A1,CD3D,CD74,EGFR,MUC1,MUC4,ZAP70	0.75
ALL	1059	AZD8055	targeted	MTORC1/2	TOR signaling	SN-43	FBN2	BEX1,CD74,FBN2,FURIN,NGF,SEC13,TMED2	0.75
ALL	106	XMD8-85	targeted	MAP2K5 (ERK5)	other	SN-01	SMC4	HIST1H1D,SMC4,UBC,YOD1	0.75
ALL	106	XMD8-85	targeted	MAP2K5 (ERK5)	other	SN-02	EGFR	CBR1,EGFR,FGR,UBC	1
ALL	106	XMD8-85	targeted	MAP2K5 (ERK5)	other	SN-03	TP53	HIST1H1D,NGF,PCSK5,RUNX3,TP53,UBC,ZNF274	1
ALL	106	XMD8-85	targeted	MAP2K5 (ERK5)	other	SN-04	COL14A1	COL14A1,CTSG,IGF2,IGFBP6,MMP2,MMP9,NCF4	1
ALL	106	XMD8-85	targeted	MAP2K5 (ERK5)	other	SN-05	MYH2	CTSG,IGF1,IGFBP6,MYH2,SLC2A4,VAMP2,VAMP8	1
ALL	106	XMD8-85	targeted	MAP2K5 (ERK5)	other	SN-06	CDC42BPA	CDC42,CDC42BPA,CTNNB1,FGR,UBC,YES1,YOD1	1
ALL	106	XMD8-85	targeted	MAP2K5 (ERK5)	other	SN-07	CPSF1	CPSF1,CPSF2,HIST1H1D,PAPOLA,SF3B1,UBC,WDR33	1
ALL	106	XMD8-85	targeted	MAP2K5 (ERK5)	other	SN-08	HMCN1	CBR1,ERBB4,HMCN1,SIRPG,UBC,WWOX,YOD1	1
ALL	106	XMD8-85	targeted	MAP2K5 (ERK5)	other	SN-09	OBSCN	CAV1,OBSCN,RHOA,SYK	1
ALL	106	XMD8-85	targeted	MAP2K5 (ERK5)	other	SN-10	PFKFB2	PFKFB2,SYK,UBC,VAMP8	0.95
ALL	106	XMD8-85	targeted	MAP2K5 (ERK5)	other	SN-11	ALKBH7	ALKBH1,ALKBH7,ALKBH8,RUNX3,TRMT112,UBC,YOD1	0.95
ALL	106	XMD8-85	targeted	MAP2K5 (ERK5)	other	SN-12	NID2	CTSG,MMP1,MMP9,NID1,NID2,PLAU,SERPINE2	0.95
ALL	106	XMD8-85	targeted	MAP2K5 (ERK5)	other	SN-13	CDK12	CDK12,CPSF2,GTF2A1,POLR2A	0.9
ALL	106	XMD8-85	targeted	MAP2K5 (ERK5)	other	SN-14	NEB	ACTN2,CSK,FGR,HIST1H1D,NEB,UBC,VIM	0.95
ALL	106	XMD8-85	targeted	MAP2K5 (ERK5)	other	SN-15	FBN2	CTSG,FBN2,FURIN,PCSK5,THBS1,THBS4,TIMP2	0.95
ALL	106	XMD8-85	targeted	MAP2K5 (ERK5)	other	SN-16	BCL11B	BCL11B,CBR1,FURIN,HDAC1,NOTCH1,PCSK5,UBC	0.95
ALL	106	XMD8-85	targeted	MAP2K5 (ERK5)	other	SN-17	KALRN	CTSG,F2RL2,FGR,KALRN,SYK,VAV3,XCL1	0.95
ALL	106	XMD8-85	targeted	MAP2K5 (ERK5)	other	SN-18	CELSR1	CELSR1,HIST1H1D,NR2C2,PRICKLE1,RORA,UBC,VANGL2	0.9
ALL	106	XMD8-85	targeted	MAP2K5 (ERK5)	other	SN-19	CRTC1	CRTC1,CTSG,GTF2A1,HIST1H1D,JUN,MMP1,UBC	0.9
ALL	106	XMD8-85	targeted	MAP2K5 (ERK5)	other	SN-20	DNAH8	CAV1,DNAH8,FGR,NTRK1,SYK,VWF,WDTC1	0.9
ALL	106	XMD8-85	targeted	MAP2K5 (ERK5)	other	SN-21	MYCBP2	CPSF2,FBXO45,FGR,MYCBP2,RAE1,SYK,UBC	0.9
ALL	106	XMD8-85	targeted	MAP2K5 (ERK5)	other	SN-22	LHX5	ARRB2,CTNNB1,FGR,LHX5,SFRP5,WNT5A,WNT7B	0.95
ALL	106	XMD8-85	targeted	MAP2K5 (ERK5)	other	SN-23	MYH2	FCGR2A,FGR,MYH2,VAV1	0.95
ALL	106	XMD8-85	targeted	MAP2K5 (ERK5)	other	SN-24	MBD6	EXOSC5,EXOSC8,HIST1H1D,MBD6,TNPO1,UBC,ZFP36L1	0.95
ALL	106	XMD8-85	targeted	MAP2K5 (ERK5)	other	SN-25	MUC4	ERBB2,HIST1H1D,IGF1,IGFBP6,MUC4,ST6GALNAC2,UBC	0.95
ALL	106	XMD8-85	targeted	MAP2K5 (ERK5)	other	SN-26	SMC4	CBR1,CDK1,SH3KBP1,SMC4,SYK,UBA52,UBC	0.95
ALL	106	XMD8-85	targeted	MAP2K5 (ERK5)	other	SN-27	PCNT	HIST1H1D,ITGA6,PCNT,UBC,VAMP8,YWHAE,YWHAG	0.95
ALL	106	XMD8-85	targeted	MAP2K5 (ERK5)	other	SN-28	SRRM2	CPSF2,F2,FGR,PRPF6,SERPINE2,SRRM2,YBX1	0.9
ALL	106	XMD8-85	targeted	MAP2K5 (ERK5)	other	SN-29	TRPV3	CBR1,TRPM8,TRPV3,UBC,USP10,USP4,VAMP8	0.9
ALL	106	XMD8-85	targeted	MAP2K5 (ERK5)	other	SN-30	SHANK2	CAV1,CTTN,HIST1H1D,SHANK2,SYK,UBC,WASL	0.9
ALL	106	XMD8-85	targeted	MAP2K5 (ERK5)	other	SN-31	NID2	CD151,ITGA6,MMP7,NGF,NID1,NID2,PCSK5	0.9
ALL	106	XMD8-85	targeted	MAP2K5 (ERK5)	other	SN-32	LAMA3	FGR,FURIN,ITGA6,LAMA3,MMP14,PCSK5,SRC	0.9
ALL	106	XMD8-85	targeted	MAP2K5 (ERK5)	other	SN-33	ZNF423	CEBPA,CTNNB1,EBF1,HIST1H1D,UBC,WNT1,ZNF423	0.9
ALL	106	XMD8-85	targeted	MAP2K5 (ERK5)	other	SN-34	RYR3	ARRB2,CAV1,CBR1,FKBP1A,RYR3,TGFBR3,UBC	0.9
ALL	106	XMD8-85	targeted	MAP2K5 (ERK5)	other	SN-35	DUOX2	ACE2,CBR1,CTSG,DECR1,DUOX2,RAC3,UBC	0.9
ALL	106	XMD8-85	targeted	MAP2K5 (ERK5)	other	SN-36	CXADR	AMICA1,CTSG,CXADR,FGR,ITGA4,PXN,THBS1	0.9
ALL	106	XMD8-85	targeted	MAP2K5 (ERK5)	other	SN-37	HMCN1	F2,F3,FURIN,HMCN1,PCSK5,SERPINE2,SIRPG	0.9
ALL	106	XMD8-85	targeted	MAP2K5 (ERK5)	other	SN-38	LAG3	CD8A,FGR,LAG3,RUNX3,SYK,VAV1,ZBTB7B	0.85
ALL	1061	SB590885	targeted	BRAF	ERK MAPK signaling	SN-01	EGFR	EGFR,GRAP2,LCP2,SKAP1	0.75
ALL	1061	SB590885	targeted	BRAF	ERK MAPK signaling	SN-02	BCL11B	BCL11B,CD3D,LCK,NOTCH1,SKAP1	0.71
ALL	1061	SB590885	targeted	BRAF	ERK MAPK signaling	SN-03	TRIO	FYN,SH2D1A,SKAP1,TRIO	0.79
ALL	1061	SB590885	targeted	BRAF	ERK MAPK signaling	SN-04	CELSR1	CD3D,CELSR1,FZD6,GNG2,LAT	0.75
ALL	1061	SB590885	targeted	BRAF	ERK MAPK signaling	SN-05	PFKFB2	AKT1,LCP2,NDFIP2,PFKFB2,SKAP1,UBC,VAV1	0.75
ALL	1061	SB590885	targeted	BRAF	ERK MAPK signaling	SN-06	COL14A1	CD3D,COL14A1,IL23A,JUN,MMP9	0.75
ALL	1061	SB590885	targeted	BRAF	ERK MAPK signaling	SN-07	ZNF423	EBF1,MEF2C,TCF3,ZNF423	0.71
ALL	1061	SB590885	targeted	BRAF	ERK MAPK signaling	SN-08	LAG3	CD3D,CD8A,LAG3,LAT,LCP2,SKAP1,ZAP70	0.71
ALL	1061	SB590885	targeted	BRAF	ERK MAPK signaling	SN-09	SIN3B	MEF2C,SIN3B,SMAD3,TGIF1	0.79
ALL	1061	SB590885	targeted	BRAF	ERK MAPK signaling	SN-10	LTBR	CD3D,FYN,LTB,LTBR,SKAP1,TRAF5,TRAF6	0.79
ALL	1061	SB590885	targeted	BRAF	ERK MAPK signaling	SN-11	PCNT	CD247,FYB,NGFRAP1,PCNT,PRKAR2B,SKAP1,YWHAE	0.79
ALL	1061	SB590885	targeted	BRAF	ERK MAPK signaling	SN-12	CRTC1	BATF3,CD3D,CRTC1,FOS	0.79
ALL	1061	SB590885	targeted	BRAF	ERK MAPK signaling	SN-13	HMCN1	ARMS2,CD3D,FYB,HMCN1,SIRPA,SIRPG,SKAP1	0.75
ALL	1061	SB590885	targeted	BRAF	ERK MAPK signaling	SN-14	LRP1,TP53	LCP2,LRP1,SH2D1A,SHC1,SKAP1,THBS1,TP53	0.75
ALL	1061	SB590885	targeted	BRAF	ERK MAPK signaling	SN-15	PYGM	CD247,LCP2,PHKB,PHKG2,PRKAR1B,PYGM,SKAP1	0.71
ALL	1061	SB590885	targeted	BRAF	ERK MAPK signaling	SN-16	DUOX2	DECR1,DUOX2,DUOXA1,LCP2,PLCG1,PRKCB,SKAP1	0.67
ALL	1061	SB590885	targeted	BRAF	ERK MAPK signaling	SN-17	CPSF1	CD2,CD2BP2,CPSF1,CSTF3,LCK,SKAP1,WDR33	0.67
ALL	1061	SB590885	targeted	BRAF	ERK MAPK signaling	SN-18	HERC1,TP53	GATA3,HERC1,NDFIP2,SH2D1A,TP53,UBC,YY1	0.71
ALL	1061	SB590885	targeted	BRAF	ERK MAPK signaling	SN-19	RAD54L	ABL1,LYN,MEF2C,RAD51,RAD54L	0.75
ALL	1061	SB590885	targeted	BRAF	ERK MAPK signaling	SN-20	DNAH9	CD247,CD3D,DNAH9,DYNLL1,NDFIP2,PRKAR2B,UBC	0.75
ALL	1061	SB590885	targeted	BRAF	ERK MAPK signaling	SN-21	RYR3	FKBP1A,GATA3,LCK,RHOA,RYR3,SKAP1,YY1	0.75
ALL	1061	SB590885	targeted	BRAF	ERK MAPK signaling	SN-22	ABCA7	ABCA7,APOA1,B2M,FHL2,LCP2,SKAP1,TGS1	0.75
ALL	1061	SB590885	targeted	BRAF	ERK MAPK signaling	SN-23	CXADR	AMICA1,CXADR,ITGB1,PTPRC,SKAP1	0.79
ALL	1061	SB590885	targeted	BRAF	ERK MAPK signaling	SN-24	EGFR,TRPV3	EGFR,GAB1,LYN,TRPM8,TRPV1,TRPV3	0.79
ALL	1061	SB590885	targeted	BRAF	ERK MAPK signaling	SN-25	DNMT3B	CD3D,DNMT3B,EOMES,GATA3,NANOG	0.79
ALL	1061	SB590885	targeted	BRAF	ERK MAPK signaling	SN-26	TP53	BTK,LYN,STAT5A,TP53	0.79
ALL	1061	SB590885	targeted	BRAF	ERK MAPK signaling	SN-27	TP53,USH2A	NGFRAP1,NINL,SH2D1A,TP53,USH2A,YWHAE,YWHAG	0.79
ALL	1061	SB590885	targeted	BRAF	ERK MAPK signaling	SN-28	MYCBP2	CD3D,MYCBP2,NGFRAP1,RAE1,RAN,UBC,YWHAE	0.79
ALL	1061	SB590885	targeted	BRAF	ERK MAPK signaling	SN-29	TRPV3	LCP2,PAK2,PSMD2,SKAP1,TRPM8,TRPV3,USP10	0.79
ALL	1061	SB590885	targeted	BRAF	ERK MAPK signaling	SN-30	MBD6	CRKL,EXOSC8,LCP2,MBD6,SKAP1,YWHAB,ZFP36	0.79
ALL	1061	SB590885	targeted	BRAF	ERK MAPK signaling	SN-31	LHX5	LCP2,LHX5,RAC1,SFRP5,SKAP1,WNT11,WNT8A	0.79
ALL	1061	SB590885	targeted	BRAF	ERK MAPK signaling	SN-32	DNMT3B	BATF3,DNMT3B,FOS,HDAC2,NDFIP2,UBC,UHRF2	0.79
ALL	1061	SB590885	targeted	BRAF	ERK MAPK signaling	SN-33	CDC42BPA	CDC42,CDC42BPA,LCP2,LYN,MYL2,SKAP1,YES1	0.79
ALL	1061	SB590885	targeted	BRAF	ERK MAPK signaling	SN-34	ALKBH7	ALKBH1,ALKBH3,ALKBH7,ALKBH8,NDFIP2,TRMT112,UBC	0.79
ALL	1061	SB590885	targeted	BRAF	ERK MAPK signaling	SN-35	ZNF423	EBF1,IL23A,PTPRC,RELA,SKAP1,SPI1,ZNF423	0.79
ALL	1061	SB590885	targeted	BRAF	ERK MAPK signaling	SN-36	MYH2	FCGR2A,LAT,LYN,MYH2,NGFRAP1,VAMP2,YWHAE	0.79
ALL	1061	SB590885	targeted	BRAF	ERK MAPK signaling	SN-37	FBN2	FBN2,FURIN,IRS2,NGF,NGFRAP1	0.75
ALL	1061	SB590885	targeted	BRAF	ERK MAPK signaling	SN-38	MUC4	GALNT6,LYN,MUC1,MUC4	0.79
ALL	1061	SB590885	targeted	BRAF	ERK MAPK signaling	SN-39	SNX33	ADAM15,GAB1,LCK,SKAP1,SNX33,SNX9,WASL	0.79
ALL	1061	SB590885	targeted	BRAF	ERK MAPK signaling	SN-40	SRRM2	BTK,CDC5L,KHDRBS1,LCK,SKAP1,SRRM2,U2AF2	0.79
ALL	1061	SB590885	targeted	BRAF	ERK MAPK signaling	SN-41	DNAH6	DCTN1,DNAH6,FLT3,GRB2,SKAP1	0.79
ALL	1061	SB590885	targeted	BRAF	ERK MAPK signaling	SN-42	BCL11B,DNMT3B	BCL11B,DNMT3B,HDAC1,TGIF1	0.79
ALL	1061	SB590885	targeted	BRAF	ERK MAPK signaling	SN-43	LTBP1	EBF1,GATA3,LTBP1,TGFB1	0.79
ALL	1061	SB590885	targeted	BRAF	ERK MAPK signaling	SN-44	CDK12	CDK12,FYN,HNRNPK,LYN,POLR2A,SKAP1,SUPT5H	0.79
ALL	1061	SB590885	targeted	BRAF	ERK MAPK signaling	SN-45	RYR1	FKBP1A,GRB2,LYN,PRKCZ,RYR1,SKAP1,TRPC3	0.79
ALL	1066	AZD6482	targeted	PI3Kbeta	PI3K signaling	SN-01	TP53	CASP3,CD3D,NGFRAP1,TP53,UBC	0.7
ALL	1066	AZD6482	targeted	PI3Kbeta	PI3K signaling	SN-02	BCL11B	BCL11B,CD3D,LCK,NOTCH1	0.61
ALL	1066	AZD6482	targeted	PI3Kbeta	PI3K signaling	SN-03	OBSCN	NGF,NGFRAP1,OBSCN,RHOG	0.65
ALL	1066	AZD6482	targeted	PI3Kbeta	PI3K signaling	SN-04	LRP1	CD3D,LRP1,LRPAP1,NGFRAP1,SORT1,SRC,TRAT1	0.7
ALL	1066	AZD6482	targeted	PI3Kbeta	PI3K signaling	SN-05	USH2A	CD3D,HSP90AA1,NGFRAP1,NINL,PLCG1,USH2A,YWHAE	0.61
ALL	1066	AZD6482	targeted	PI3Kbeta	PI3K signaling	SN-06	RYR1	CD3D,HOMER3,IKBKB,NGFRAP1,PRKCQ,RYR1,TSC1	0.65
ALL	1066	AZD6482	targeted	PI3Kbeta	PI3K signaling	SN-07	TRIO	NGFR,NGFRAP1,RHOC,RHOH,TRIO	0.65
ALL	1066	AZD6482	targeted	PI3Kbeta	PI3K signaling	SN-08	KALRN	CD3D,GNG2,KALRN,NGF,NGFRAP1,RHOC,XCR1	0.65
ALL	1066	AZD6482	targeted	PI3Kbeta	PI3K signaling	SN-09	CDC42BPA	CD3D,CDC42,CDC42BPA,LCP2	0.7
ALL	1066	AZD6482	targeted	PI3Kbeta	PI3K signaling	SN-10	ABCA7	ABCA7,APOA1,CD3D,JUN,NGFR,NGFRAP1,SP1	0.65
ALL	1066	AZD6482	targeted	PI3Kbeta	PI3K signaling	SN-11	CELSR1	CELSR1,FZD6,GNAO1,NGFR,NGFRAP1,PLCG1,VANGL1	0.78
ALL	1066	AZD6482	targeted	PI3Kbeta	PI3K signaling	SN-12	LTBR	CASP2,LTB,LTBR,NGFRAP1,TRAF2	0.74
ALL	1066	AZD6482	targeted	PI3Kbeta	PI3K signaling	SN-13	MUC4	CD3D,ERBB2,GRAP2,MUC4	0.74
ALL	1066	AZD6482	targeted	PI3Kbeta	PI3K signaling	SN-14	MYH2	CD3D,CD3G,FCGR2A,MYH2	0.74
ALL	1066	AZD6482	targeted	PI3Kbeta	PI3K signaling	SN-15	LAG3	BCL2,CD3D,CD8A,DIABLO,LAG3,NGFRAP1,ZAP70	0.74
ALL	1066	AZD6482	targeted	PI3Kbeta	PI3K signaling	SN-16	CXADR	AMICA1,CXADR,ITGA4,JAM3,NGFRAP1,TSC1,YWHAZ	0.7
ALL	1066	AZD6482	targeted	PI3Kbeta	PI3K signaling	SN-17	TRPV3	CDK1,LRRC47,NGFRAP1,TRPM8,TRPV3,TSC1,USP10	0.65
ALL	1066	AZD6482	targeted	PI3Kbeta	PI3K signaling	SN-18	LHX5	GSK3B,LHX5,NGFRAP1,SFRP4,SFRP5,TSC1,WNT8A	0.7
ALL	1066	AZD6482	targeted	PI3Kbeta	PI3K signaling	SN-19	ALKBH7	ALKBH1,ALKBH7,ALKBH8,DIABLO,NGFRAP1,TRMT112,UBC	0.7
ALL	1066	AZD6482	targeted	PI3Kbeta	PI3K signaling	SN-20	LTBP1	CD3D,FN1,LTBP1,SYK	0.61
ALL	1066	AZD6482	targeted	PI3Kbeta	PI3K signaling	SN-21	HMCN1	CD3D,CD47,HMCN1,SIRPG,SYK,TRAT1,VWF	0.61
ALL	1066	AZD6482	targeted	PI3Kbeta	PI3K signaling	SN-22	MUC4	CD3D,GALNT6,LYN,MUC1,MUC4,ST6GALNAC4,ZAP70	0.65
ALL	1066	AZD6482	targeted	PI3Kbeta	PI3K signaling	SN-23	NID2	AKT1,MAP3K5,MMP1,NGFRAP1,NID1,NID2,YWHAE	0.61
ALL	1066	AZD6482	targeted	PI3Kbeta	PI3K signaling	SN-24	ZNF423	EBF1,GATA3,NFKB1,NGFR,NGFRAP1,TGFB1,ZNF423	0.65
ALL	1066	AZD6482	targeted	PI3Kbeta	PI3K signaling	SN-25	CDK12	CCNT1,CDK12,MEF2C,NGFR,NGFRAP1,POLR2A,PRKACB	0.7
ALL	1066	AZD6482	targeted	PI3Kbeta	PI3K signaling	SN-26	MBD6	EXOSC8,IL8,LYN,MBD6,NGF,NGFRAP1,UBB	0.65
ALL	1066	AZD6482	targeted	PI3Kbeta	PI3K signaling	SN-27	TLN2	CAPN2,LYN,MAPK3,NGFRAP1,TLN2,TSC1,YES1	0.65
ALL	1066	AZD6482	targeted	PI3Kbeta	PI3K signaling	SN-28	CDK12	CCNL1,CD3D,CDK12,CDKN1A,MAP3K5,MCM2,UBC	0.7
ALL	1066	AZD6482	targeted	PI3Kbeta	PI3K signaling	SN-29	NEB	ACTN2,CASP3,LYN,NEB,NGFRAP1,PTK2,VIM	0.65
ALL	1066	AZD6482	targeted	PI3Kbeta	PI3K signaling	SN-30	DUOX2	CD3D,DECR1,DUOX2,IRAK3,SYK,TLR4,TNF	0.65
ALL	1067	CCT007093	targeted	PPM1D	other	SN-01	TP53	CD3D,FHL2,TP53,UBC	0.86
ALL	1067	CCT007093	targeted	PPM1D	other	SN-02	EGFR	BLNK,CMTM7,EGFR,GRB2	0.91
ALL	1067	CCT007093	targeted	PPM1D	other	SN-03	CDC42BPA	CD3D,CDC42,CDC42BPA,CDH2,GRAP2,VAV1	0.86
ALL	1067	CCT007093	targeted	PPM1D	other	SN-04	NEB	ACTN2,CD3D,FHL2,GRAP2,HRAS,NEB,TTN	0.86
ALL	1067	CCT007093	targeted	PPM1D	other	SN-05	BCL11B	BCL11B,CDH2,GATA3,NOTCH1	0.86
ALL	1067	CCT007093	targeted	PPM1D	other	SN-06	SNX33	BLNK,CD74,CMTM7,DNM2,SNX33,SNX9,VAV1	0.86
ALL	1067	CCT007093	targeted	PPM1D	other	SN-07	USH2A	CD247,CD3D,NINL,PRKAR2B,USH2A	0.91
ALL	1067	CCT007093	targeted	PPM1D	other	SN-08	ESPL1	CDH2,CTNNB1,ESPL1,FHL2,INCENP	0.86
ALL	1067	CCT007093	targeted	PPM1D	other	SN-09	ZNF423	BLNK,CDKN1A,CMTM7,EBF1,SPI1,TGFB1,ZNF423	0.82
ALL	1067	CCT007093	targeted	PPM1D	other	SN-10	RAD54L	ABL1,CD3D,PTPRC,RAD51,RAD54L	0.82
ALL	1067	CCT007093	targeted	PPM1D	other	SN-11	COL14A1	CD3D,CDH2,COL14A1,COL2A1,FOS,MMP1,MMP9	0.86
ALL	1067	CCT007093	targeted	PPM1D	other	SN-12	DUOX2	CD3D,DECR1,DUOX2,GRAP2,RAC1,RAC3,RHOH	0.86
ALL	1067	CCT007093	targeted	PPM1D	other	SN-13	CPSF1	BLNK,CMTM7,CPSF1,ESR1,RBBP6,SOS1,WDR33	0.86
ALL	1067	CCT007093	targeted	PPM1D	other	SN-14	HMCN1	CD3D,FYB,GRAP2,HMCN1,SIRPA,SIRPG,ZAP70	0.95
ALL	1067	CCT007093	targeted	PPM1D	other	SN-15	ABCA7	ABCA7,APOA1,BLNK,CMTM7,SDC2,SHC1,TTR	0.95
ALL	1067	CCT007093	targeted	PPM1D	other	SN-16	DNAH9	BLNK,CMTM7,DNAH9,DYNLL2,MAPK8,NCK1,RILP	0.95
ALL	1067	CCT007093	targeted	PPM1D	other	SN-17	MYH2	CD3D,CD3G,FCGR2A,MYH2	0.91
ALL	1067	CCT007093	targeted	PPM1D	other	SN-18	SHANK2	CD3D,CDH2,DLG1,DLG4,LCK,SHANK2,SRC	0.91
ALL	1067	CCT007093	targeted	PPM1D	other	SN-19	PYGM	AMFR,CD3D,GPI,PGM1,PYGM	0.95
ALL	1067	CCT007093	targeted	PPM1D	other	SN-20	ABCA7	ABCA7,APOA1,CD3D,FHL2,LCK,RELA,TGS1	0.95
ALL	1067	CCT007093	targeted	PPM1D	other	SN-21	MBD6	CD3D,EXOSC8,MAPK1,MBD6,PRKCQ,ZFP36	0.91
ALL	1067	CCT007093	targeted	PPM1D	other	SN-22	CELSR1	CD3D,CELSR1,CTHRC1,FZD6,GNG2	0.82
ALL	1067	CCT007093	targeted	PPM1D	other	SN-23	MYCBP2	CD3D,CDH2,KPNB1,MET,MYCBP2,RAE1,UBC	0.82
ALL	1067	CCT007093	targeted	PPM1D	other	SN-24	CXADR	AMICA1,CD3D,COL2A1,CXADR,ITGB1,SHC1,ZYX	0.91
ALL	1067	CCT007093	targeted	PPM1D	other	SN-25	MYCBP2	BLNK,CMTM7,MYCBP2,NTRK1,PLCG1,RAE1,TPR	0.91
ALL	1067	CCT007093	targeted	PPM1D	other	SN-26	MYH2	BLNK,CMTM7,GRAP2,MYH2,RAB13,RAC1,STXBP3	0.86
ALL	1067	CCT007093	targeted	PPM1D	other	SN-27	FBN2	BLNK,CMTM7,FBN2,LYN,MFAP5,NOTCH1,STAT3	0.82
ALL	1067	CCT007093	targeted	PPM1D	other	SN-28	RYR1	BLNK,CDH2,CMTM7,RYR1,SRC,TRPC3,VAV2	0.82
ALL	1067	CCT007093	targeted	PPM1D	other	SN-29	CDK12	CD3D,CDK12,JUN,NME3,POLR2A	0.82
ALL	1067	CCT007093	targeted	PPM1D	other	SN-30	TRPV3	CD3D,PRKCE,PRKCQ,TRPM8,TRPV1,TRPV3,USP10	0.82
ALL	1067	CCT007093	targeted	PPM1D	other	SN-31	ALKBH7	ALKBH1,ALKBH3,ALKBH7,ALKBH8,CD3D,TRMT112,UBC	0.86
ALL	1067	CCT007093	targeted	PPM1D	other	SN-32	CRTC1	BLNK,CD3D,CMTM7,CRTC1,FOS,JUN,SYK	0.86
ALL	1067	CCT007093	targeted	PPM1D	other	SN-33	OBSCN	BCR,BLNK,CMTM7,FHL2,OBSCN,RHOH,TTN	0.77
ALL	1069	EHT 1864	targeted	Rac GTPases	cytoskeleton	SN-01	LAMA3	ACTA1,LAMA3,MAL	0.83
ALL	1069	EHT 1864	targeted	Rac GTPases	cytoskeleton	SN-02	TRIO	HNF1A,MAL,MAPK8,PAK1,TRIO	0.83
ALL	1069	EHT 1864	targeted	Rac GTPases	cytoskeleton	SN-03	FBN2	CDH2,FBN2,MFAP5,NEURL1B,NOTCH1	0.88
ALL	1069	EHT 1864	targeted	Rac GTPases	cytoskeleton	SN-04	ZNF423	CDH2,CREBBP,EBF1,MAL,SRF,ZNF423	0.83
ALL	1069	EHT 1864	targeted	Rac GTPases	cytoskeleton	SN-05	EGFR	ACTA1,EGFR,MAL,NEURL1B,NOTCH1,VEGFA,ZFYVE28	0.83
ALL	1069	EHT 1864	targeted	Rac GTPases	cytoskeleton	SN-06	TP53	ACOT1,MGMT,TECR,TP53,UBC	0.88
ALL	1069	EHT 1864	targeted	Rac GTPases	cytoskeleton	SN-07	TLN2	ACTA1,CAPN2,CDH2,MAL,PXN,TLN2,VCL	0.92
ALL	1069	EHT 1864	targeted	Rac GTPases	cytoskeleton	SN-08	ABCA7	ABCA7,APOA1,FABP1,HNF1A,MAL,PLIN2,TGS1	0.92
ALL	1069	EHT 1864	targeted	Rac GTPases	cytoskeleton	SN-09	SHANK2	CDH2,CTNNB1,DNM2,HNF1A,MAL,SHANK2,SRC	0.92
ALL	1069	EHT 1864	targeted	Rac GTPases	cytoskeleton	SN-10	DUOX2	ACTA1,CD44,DECR1,DUOX2,MAL,RAC1,VCAM1	0.92
ALL	1069	EHT 1864	targeted	Rac GTPases	cytoskeleton	SN-11	OBSCN	DIAPH1,MAL,OBSCN,RHOB	0.92
ALL	1069	EHT 1864	targeted	Rac GTPases	cytoskeleton	SN-12	SRRM2	MAGOH,MAL,RPS4Y1,RPS6KA3,SRF,SRRM2,YBX1	0.92
ALL	1069	EHT 1864	targeted	Rac GTPases	cytoskeleton	SN-13	TRPV3	ACTA1,HSPB1,MAL,PSMD2,TRPM8,TRPV3,USP10	0.96
ALL	1069	EHT 1864	targeted	Rac GTPases	cytoskeleton	SN-14	USH2A	ACTA1,MAL,RHOA,RTKN,TAX1BP3,USH1C,USH2A	0.96
ALL	1069	EHT 1864	targeted	Rac GTPases	cytoskeleton	SN-15	LAG3	ACTA1,CD8A,LAG3,MAL,PTPRC,SRC,TRAT1	0.92
ALL	1069	EHT 1864	targeted	Rac GTPases	cytoskeleton	SN-16	LTBR	CDH2,DIAPH1,LTBR,MAL,PTPN11,TRAF3,UBC	0.96
ALL	1069	EHT 1864	targeted	Rac GTPases	cytoskeleton	SN-17	RYR3	ACTA1,FKBP1A,GSN,MAL,RYR3,SNCA,ZFYVE9	0.92
ALL	1069	EHT 1864	targeted	Rac GTPases	cytoskeleton	SN-18	SNX33	ACTA1,CENPK,MAL,SNX33,SNX9,UBC,ZWINT	0.92
ALL	1069	EHT 1864	targeted	Rac GTPases	cytoskeleton	SN-19	ALKBH7	ALKBH1,ALKBH7,ALKBH8,ASNS,TRMT11,TRMT112,UBC	0.92
ALL	1069	EHT 1864	targeted	Rac GTPases	cytoskeleton	SN-20	COL14A1	CDH2,COL14A1,MMP9,VEGFA	0.92
ALL	1069	EHT 1864	targeted	Rac GTPases	cytoskeleton	SN-21	SIN3B	ASNS,HDAC1,HNF1A,MAL,SIN3B,UBC,UBE3A	0.92
ALL	1069	EHT 1864	targeted	Rac GTPases	cytoskeleton	SN-22	MBD6	ACTA1,C1D,CASP3,EXOSC8,MAL,MBD6,PRKDC	0.92
ALL	1069	EHT 1864	targeted	Rac GTPases	cytoskeleton	SN-23	LTBR	GZMA,LTBR,MAL,MAPK14,SRF,TNFSF14,TRAF2	0.92
ALL	1072	BMS-708163	targeted	g-secretase	other	SN-01	LAMA3	LAMA3,PAK1,SYK	0.88
ALL	1072	BMS-708163	targeted	g-secretase	other	SN-02	SMC4	MAPK14,NCF4,RB1,RHOBTB3,SMC4,SYK,UBC	0.75
ALL	1072	BMS-708163	targeted	g-secretase	other	SN-03	TRIO	ANXA1,RGS18,TRIO	0.88
ALL	1072	BMS-708163	targeted	g-secretase	other	SN-04	PYGM	IFI30,IRF8,MAX,PFKM,PYGM,SYK,UBC	0.83
ALL	1072	BMS-708163	targeted	g-secretase	other	SN-05	KALRN	BCR,BLNK,KALRN,SYK	0.83
ALL	1072	BMS-708163	targeted	g-secretase	other	SN-06	TP53	PTEN,SH2D1A,TP53	0.83
ALL	1072	BMS-708163	targeted	g-secretase	other	SN-07	HERC1,TP53	CD9,HERC1,ICAM1,IFI30,TP53	0.96
ALL	1072	BMS-708163	targeted	g-secretase	other	SN-08	PRPF8	APP,CASP8,PRPF8,PTBP1,RGS18,TNFSF10	0.96
ALL	1072	BMS-708163	targeted	g-secretase	other	SN-09	EGFR	CTNNA1,EGFR,SYK,VAV2	0.96
ALL	1072	BMS-708163	targeted	g-secretase	other	SN-10	CDC42BPA	BLNK,CDC42,CDC42BPA,ENAH,SYK,VAV2,YES1	0.96
ALL	1072	BMS-708163	targeted	g-secretase	other	SN-11	CXADR	AMICA1,CD9,CXADR,IFI30,IRF8,ITGB1,ZBTB17	0.96
ALL	1072	BMS-708163	targeted	g-secretase	other	SN-12	RAD54L	CHEK1,RAD51,RAD54L,SYK,TEC	1
ALL	1072	BMS-708163	targeted	g-secretase	other	SN-13	CELSR1	CELSR1,NCF4,RAC1,ROR2,SYK,VANGL2,VAV2	1
ALL	1072	BMS-708163	targeted	g-secretase	other	SN-14	TP53	FHL1,NCF4,SMAD2,TP53,XRCC6	1
ALL	1072	BMS-708163	targeted	g-secretase	other	SN-15	ABCA7	ABCA7,APOA1,FHL1,NRIP1,RELA,SYK	1
ALL	1072	BMS-708163	targeted	g-secretase	other	SN-16	COL14A1	CD9,COL14A1,HBEGF,MMP2,MMP9,NCF4	1
ALL	1072	BMS-708163	targeted	g-secretase	other	SN-17	MYH2	CD9,FCGR2A,ITGB1,MYH2,SYK,VAMP2,VAMP8	1
ALL	1072	BMS-708163	targeted	g-secretase	other	SN-18	FBN2	FBN2,FURIN,MMP9,NCF4,SPP1,SYK,TIMP2	1
ALL	1072	BMS-708163	targeted	g-secretase	other	SN-19	RYR3	FHL1,FKBP1A,FKBP1B,RHOA,RYR3,SMAD2,SYK	1
ALL	1072	BMS-708163	targeted	g-secretase	other	SN-20	DNAH8	DNAH8,DYNLT3,SYK,VWF,WDTC1	1
ALL	1072	BMS-708163	targeted	g-secretase	other	SN-21	LHX5	BLNK,EBF1,LHX5,SFRP5,SPI1,SYK,WNT10B	1
ALL	1072	BMS-708163	targeted	g-secretase	other	SN-22	DNAH9	DNAH9,DYNLL1,DYNLL2,DYNLT3,KIF26A,PAK1,SYK	0.92
ALL	1072	BMS-708163	targeted	g-secretase	other	SN-23	SHANK2	DLG4,FYN,HTR2A,RGS18,SH2D1A,SHANK2	0.92
ALL	1072	BMS-708163	targeted	g-secretase	other	SN-24	USH2A	ANXA1,CNTN2,RGS18,S100A11,UBC,USH1C,USH2A	0.96
ALL	1072	BMS-708163	targeted	g-secretase	other	SN-25	SNX33	BLNK,NCK1,SNX30,SNX33,SNX9,SYK,WASL	0.92
ALL	1072	BMS-708163	targeted	g-secretase	other	SN-26	MUC4	CD8A,GCNT1,MUC1,MUC4,SELL,ZAP70	0.92
ALL	1072	BMS-708163	targeted	g-secretase	other	SN-27	MYCBP2	FBXO45,FHL1,MYCBP2,RBPJ,RHOBTB3,SKP1,UBC	0.92
ALL	1072	BMS-708163	targeted	g-secretase	other	SN-28	ALKBH7	ALKBH1,ALKBH7,ALKBH8,RHOBTB3,TRMT112,UBC,VAMP8	1
ALL	1072	BMS-708163	targeted	g-secretase	other	SN-29	MBD6	EXOSC8,IL8,MAPK3,MBD6,RGS18,TNFSF10,ZFP36	1
ALL	1072	BMS-708163	targeted	g-secretase	other	SN-30	MBD6	EXOSC8,KHSRP,MAPK11,MBD6,NCF4,SYK,XRN1	1
ALL	1072	BMS-708163	targeted	g-secretase	other	SN-31	PCNT	CD9,ITGA6,PAK1,PCNT,PLK1,SYK,YWHAG	1
ALL	1072	BMS-708163	targeted	g-secretase	other	SN-32	TRPV3	IL2RG,PRKCE,SYK,TRPM8,TRPV1,TRPV3	1
ALL	1072	BMS-708163	targeted	g-secretase	other	SN-33	LAMA3	CD9,IL23A,ITGA3,LAMA3	0.96
ALL	1072	BMS-708163	targeted	g-secretase	other	SN-34	SRRM2	JAK1,MAGOH,SRRM2,SYK	0.96
ALL	1072	BMS-708163	targeted	g-secretase	other	SN-35	LTBR	LTBR,NCF4,TNFSF10,TRAF2,TXN,UBC,VAMP8	0.96
ALL	1072	BMS-708163	targeted	g-secretase	other	SN-36	ARID1A,TP53	ARID1A,IFI30,IRF7,RELA,SH2D1A,SYK,TP53	0.96
ALL	1072	BMS-708163	targeted	g-secretase	other	SN-37	LRP1	APP,BLNK,LRP1,RGS18,SHC1,SRC,SYK	0.96
ALL	1072	BMS-708163	targeted	g-secretase	other	SN-38	CDK12	CCNT1,CDK12,ESR1,GNAI1,RGS18	0.96
ALL	1072	BMS-708163	targeted	g-secretase	other	SN-39	BCL11B	BCL11B,FYN,RAPGEF1,RELN,SH2D1A,SYK,TBR1	0.92
ALL	1072	BMS-708163	targeted	g-secretase	other	SN-40	DUOX2	DECR1,DUOX2,IL2RG,PRKCB,SELL,SYK,TNF	0.92
ALL	1072	BMS-708163	targeted	g-secretase	other	SN-41	HMCN1	HMCN1,IFI30,NCF4,SIRPG,VCAM1,VEGFA	0.92
ALL	1072	BMS-708163	targeted	g-secretase	other	SN-42	CRTC1	BTK,CREB1,CRTC1,FOS,RGS18,SST,SYK	0.92
ALL	1072	BMS-708163	targeted	g-secretase	other	SN-43	SHANK2	CTTN,EDNRB,MYLK,RGS18,SHANK2,SLC9A3,SYK	0.92
ALL	1072	BMS-708163	targeted	g-secretase	other	SN-44	USH2A	CD247,NINL,PRKAR2B,SYK,TUBGCP5,USH2A	0.92
ALL	1072	BMS-708163	targeted	g-secretase	other	SN-45	RAD54L	NCF4,P2RY1,RAD51,RAD54L,RGS18,WDTC1,XRCC6	0.92
ALL	1072	BMS-708163	targeted	g-secretase	other	SN-46	LTBR	BLNK,IL2RG,LTBR,SOS1,SYK,TNFRSF4,TRAF5	0.92
ALL	1072	BMS-708163	targeted	g-secretase	other	SN-47	NID2	CD9,CXCL12,ITGB1,MMP9,NID1,NID2,RGS18	0.92
ALL	1072	BMS-708163	targeted	g-secretase	other	SN-48	DNMT3B	CD8A,DNMT3B,EOMES,NANOG,SELL,SYK,TTF1	0.92
ALL	1072	BMS-708163	targeted	g-secretase	other	SN-49	SRRM2	FYN,HNRNPK,RANBP2,SRRM1,SRRM2,SYK,UPF3B	0.92
ALL	1072	BMS-708163	targeted	g-secretase	other	SN-50	RAD54L,TP53	RAD51,RAD54L,RECQL,RHOBTB3,SH2D1A,TP53,UBC	0.92
ALL	1072	BMS-708163	targeted	g-secretase	other	SN-51	LTBP1	FN1,LTBP1,PPBP,PTEN,RGS18,SYK,TGFB1	0.92
ALL	1072	BMS-708163	targeted	g-secretase	other	SN-52	NEB	GNAI1,NEB,PXN,RGS18,SYK,TPM3,TTN	0.96
ALL	1072	BMS-708163	targeted	g-secretase	other	SN-53	TLN2	CD9,ITGB2,NCF4,SELL,SELP,TLN2,VCAM1	0.96
ALL	1072	BMS-708163	targeted	g-secretase	other	SN-54	ABCA7	ABCA7,APOA1,APP,B2M,IFI30,RGS18,TTR	0.92
ALL	1072	BMS-708163	targeted	g-secretase	other	SN-55	RYR1,TRIO	FYN,GRM5,HOMER1,RGS18,RYR1,SYK,TRIO	0.92
ALL	1072	BMS-708163	targeted	g-secretase	other	SN-56	CDK12	CDK12,JUN,POLR2A,STAT4,SYK	0.96
ALL	1129	PF-4708671	targeted	RPS6KB1 (p70S6KA)	TOR signaling	SN-01	NEB	ASNS,NEB,TPM4,UBC	0.82
ALL	1129	PF-4708671	targeted	RPS6KB1 (p70S6KA)	TOR signaling	SN-02	ARID1A	ARID1A,ASNS,ATF4,GTF2B,RORA,TRIB3,VDR	0.91
ALL	1129	PF-4708671	targeted	RPS6KB1 (p70S6KA)	TOR signaling	SN-03	TLN2	ASNS,DDIT3,ITGB1,TLN2,TRIB3,UBC,ZBTB17	0.91
ALL	1129	PF-4708671	targeted	RPS6KB1 (p70S6KA)	TOR signaling	SN-04	MYH2	ASNS,EXOC4,MYH2,SNAP23,STX3,STXBP3,UBC	0.86
ALL	1129	PF-4708671	targeted	RPS6KB1 (p70S6KA)	TOR signaling	SN-05	DNAH8	ASNS,DNAH8,DYNC1H1,GARS,OPTN,YARS	0.95
ALL	1129	PF-4708671	targeted	RPS6KB1 (p70S6KA)	TOR signaling	SN-06	HMCN1	ASNS,ERBB4,HMCN1,PIK3CA,SIRPG,UBC,VEGFA	0.95
ALL	1129	PF-4708671	targeted	RPS6KB1 (p70S6KA)	TOR signaling	SN-07	DNMT3B	ASNS,DNMT3B,IL4I1,MAT1A	0.91
ALL	1129	PF-4708671	targeted	RPS6KB1 (p70S6KA)	TOR signaling	SN-08	DNAH9	ASNS,DNAH9,DYNLL1,DYNLL2,KIF26A,OPTN,UBC	0.91
ALL	1129	PF-4708671	targeted	RPS6KB1 (p70S6KA)	TOR signaling	SN-09	SIN3B	ASNS,CAD,MAX,SIN3B	0.91
ALL	1129	PF-4708671	targeted	RPS6KB1 (p70S6KA)	TOR signaling	SN-10	FBN2	ASNS,FBN2,JAG1,MFAP5,RPL39L,RPS27A,UBC	0.82
ALL	1129	PF-4708671	targeted	RPS6KB1 (p70S6KA)	TOR signaling	SN-11	MBD6	ASNS,ATF4,EXOSC8,IL8,MBD6,VEGFA,ZFP36	0.86
ALL	1129	PF-4708671	targeted	RPS6KB1 (p70S6KA)	TOR signaling	SN-12	ALKBH7	ALKBH1,ALKBH7,ALKBH8,ASNS,N6AMT1,TRMT112,UBC	0.82
ALL	1129	PF-4708671	targeted	RPS6KB1 (p70S6KA)	TOR signaling	SN-13	DUOX2	ALDH18A1,ARG2,ASNS,DECR1,DUOX2,NOS1,OAT	0.82
ALL	1129	PF-4708671	targeted	RPS6KB1 (p70S6KA)	TOR signaling	SN-14	PYGM	ASNS,CCNE2,LGALS1,MAX,PFKM,PYGM,UBC	0.86
ALL	1129	PF-4708671	targeted	RPS6KB1 (p70S6KA)	TOR signaling	SN-15	LHX5	ASNS,LHX5,NCOA3,SFRP5,UBC,WNT10B,WNT8B	0.82
ALL	1129	PF-4708671	targeted	RPS6KB1 (p70S6KA)	TOR signaling	SN-16	TRPV3	ASNS,TRPA1,TRPM8,TRPV3,UBC,USP10,USP15	0.82
ALL	1129	PF-4708671	targeted	RPS6KB1 (p70S6KA)	TOR signaling	SN-17	CELSR1	ASNS,CELSR1,NOTCH1,RORA,UBC,VANGL2,WNT5A	0.86
ALL	1129	PF-4708671	targeted	RPS6KB1 (p70S6KA)	TOR signaling	SN-18	ABCA7	ABCA7,APOA1,ARNTL,ASNS,SNCA,TGS1,UBC	0.86
ALL	1129	PF-4708671	targeted	RPS6KB1 (p70S6KA)	TOR signaling	SN-19	LAMA3	ASNS,IARS,IRS1,LAMA3,PXN	0.86
ALL	1129	PF-4708671	targeted	RPS6KB1 (p70S6KA)	TOR signaling	SN-20	SNX33	ADAM15,ASNS,LCK,SKAP1,SNX33,SNX9,UBC	0.86
ALL	1129	PF-4708671	targeted	RPS6KB1 (p70S6KA)	TOR signaling	SN-21	CDK12	ASNS,BCL6,CCND2,CCNK,CDK12,CDK2,UBC	0.86
ALL	1129	PF-4708671	targeted	RPS6KB1 (p70S6KA)	TOR signaling	SN-22	SHANK2	ASNS,CD8A,DNM2,SHANK2,SRC,UBC,VAV1	0.91
ALL	1129	PF-4708671	targeted	RPS6KB1 (p70S6KA)	TOR signaling	SN-23	ZNF423	ASNS,CEBPB,EBF1,ID2,TCF3,UBC,ZNF423	0.86
ALL	1129	PF-4708671	targeted	RPS6KB1 (p70S6KA)	TOR signaling	SN-24	LAG3	CCR7,CD8A,LAG3,LCK	0.91
ALL	1129	PF-4708671	targeted	RPS6KB1 (p70S6KA)	TOR signaling	SN-25	CPSF1	ASNS,CPSF1,DDX11,SSU72,TCEAL4,UBC,WDR33	0.95
ALL	1133	JNJ-26854165	targeted	MDM2	p53 pathway	SN-01	TP53	PYCARD,S100A4,TP53	0.65
ALL	1133	JNJ-26854165	targeted	MDM2	p53 pathway	SN-02	BCL11B	BCL11B,CDH2,LCK,NOTCH1	0.74
ALL	1133	JNJ-26854165	targeted	MDM2	p53 pathway	SN-03	EGFR	CD3D,EGFR,GRAP2,LCK,TRAT1,YES1	0.74
ALL	1133	JNJ-26854165	targeted	MDM2	p53 pathway	SN-04	CDC42BPA	CASP3,CDC42,CDC42BPA,LCK,NGFRAP1	0.74
ALL	1133	JNJ-26854165	targeted	MDM2	p53 pathway	SN-05	PCNT	CD247,NGFRAP1,PCNT,PRKAR2B,TRAT1,YWHAE	0.78
ALL	1133	JNJ-26854165	targeted	MDM2	p53 pathway	SN-06	PRPF8	BEX1,NGF,NGFRAP1,PRPF8,UBC	0.7
ALL	1133	JNJ-26854165	targeted	MDM2	p53 pathway	SN-07	LRP1	CDH2,LRP1,SRC,TRAT1	0.7
ALL	1133	JNJ-26854165	targeted	MDM2	p53 pathway	SN-08	BCL11B,DNMT3B	BCL11B,DNMT3B,HDAC2,NGFRAP1,UBC,UHRF2,YWHAE	0.7
ALL	1133	JNJ-26854165	targeted	MDM2	p53 pathway	SN-09	RYR3	FKBP1A,INS,MTOR,RYR3,TCIRG1,TSPO	0.7
ALL	1133	JNJ-26854165	targeted	MDM2	p53 pathway	SN-10	PFKFB2	CD3D,NGFRAP1,PFKFB2,PRKAA2,TRAT1,TSC1,UBC	0.7
ALL	1133	JNJ-26854165	targeted	MDM2	p53 pathway	SN-11	USH2A	HSP90AA1,LCK,NGFRAP1,NINL,TUBG2,USH2A,YWHAE	0.7
ALL	1133	JNJ-26854165	targeted	MDM2	p53 pathway	SN-12	CELSR1	CELSR1,LCK,MAPK9,NGFRAP1,ROR2,SORT1,VANGL2	0.7
ALL	1133	JNJ-26854165	targeted	MDM2	p53 pathway	SN-13	NEB	ACTN2,CASP3,NEB,NGFRAP1,SRC,TRAT1,VIM	0.65
ALL	1133	JNJ-26854165	targeted	MDM2	p53 pathway	SN-14	LTBR	BEX1,BIRC2,CASP3,LTBR,NGFRAP1,TRAF5,TRAF6	0.65
ALL	1133	JNJ-26854165	targeted	MDM2	p53 pathway	SN-15	BCL11B,FBN2	BCL11B,FBN2,FURIN,MFAP5,NGF,NGFRAP1,NOTCH1	0.65
ALL	1133	JNJ-26854165	targeted	MDM2	p53 pathway	SN-16	SHANK2	DLG4,GRB2,LCK,NGF,NGFRAP1,SHANK2,SRC	0.65
ALL	1133	JNJ-26854165	targeted	MDM2	p53 pathway	SN-17	DUOX2	DECR1,DUOX2,NGFRAP1,PRKCA,PRKCQ,VCAM1,YWHAE	0.7
ALL	1133	JNJ-26854165	targeted	MDM2	p53 pathway	SN-18	CXADR	AMICA1,CASP3,CXADR,ITGA4,JAM3,NGFRAP1,RHOA	0.65
ALL	1133	JNJ-26854165	targeted	MDM2	p53 pathway	SN-19	LTBP1	CDH1,LTBP1,S100A4,TGFB1,TSPO,VWF	0.65
ALL	1133	JNJ-26854165	targeted	MDM2	p53 pathway	SN-20	RYR3	CD247,FKBP1B,LCK,PRKACB,RYR2,RYR3,TRAT1	0.65
ALL	1133	JNJ-26854165	targeted	MDM2	p53 pathway	SN-21	ABCA7	ABCA7,APOA1,B2M,CTSS,TCIRG1,TF,TTR	0.65
ALL	1133	JNJ-26854165	targeted	MDM2	p53 pathway	SN-22	HMCN1	CD3D,FYB,HMCN1,SIRPA,SIRPG,TRAT1,VWF	0.61
ALL	1133	JNJ-26854165	targeted	MDM2	p53 pathway	SN-23	LHX5	CASP3,GSK3B,LHX5,NGFRAP1,SFRP5,UBC,WNT8B	0.61
ALL	1133	JNJ-26854165	targeted	MDM2	p53 pathway	SN-24	LHX5	LCK,LHX5,SFRP5,SRC,TNC,TRAT1,WNT7B	0.61
ALL	1133	JNJ-26854165	targeted	MDM2	p53 pathway	SN-25	OBSCN	ARHGEF1,NGFR,NGFRAP1,OBSCN	0.61
ALL	1133	JNJ-26854165	targeted	MDM2	p53 pathway	SN-26	PYGM	GYG1,LCK,NGFR,NGFRAP1,PYGM,UBA52,UBC	0.61
ALL	1133	JNJ-26854165	targeted	MDM2	p53 pathway	SN-27	MYCBP2	CASP3,CDKN1A,FBXO45,MYCBP2,NGFRAP1,SKP1,TFDP2	0.61
ALL	1133	JNJ-26854165	targeted	MDM2	p53 pathway	SN-28	LAG3	CD8A,LAG3,LCK,PRKCQ,TRAT1,TSPO,ZAP70	0.61
ALL	1133	JNJ-26854165	targeted	MDM2	p53 pathway	SN-29	TRPV3	LCK,PIK3CA,TAC1,TRAT1,TRPM8,TRPV1,TRPV3	0.61
ALL	1133	JNJ-26854165	targeted	MDM2	p53 pathway	SN-30	TRPV3	CASP3,KRT19,MAPK14,NGFRAP1,TRPM8,TRPV3,USP10	0.61
ALL	1133	JNJ-26854165	targeted	MDM2	p53 pathway	SN-31	CRTC1	CD3D,CRTC1,FOS,IL23A,JUN,TRAT1,TSPO	0.61
ALL	1133	JNJ-26854165	targeted	MDM2	p53 pathway	SN-32	EGFR,TP53	EGFR,LCK,NGFRAP1,PYCARD,TP53,TSC1,YWHAZ	0.61
ALL	1133	JNJ-26854165	targeted	MDM2	p53 pathway	SN-33	ALKBH7	ALKBH1,ALKBH7,ALKBH8,LCK,TRMT112,UBC,ZWINT	0.61
ALL	1133	JNJ-26854165	targeted	MDM2	p53 pathway	SN-34	SIN3B,TP53	HDAC5,NGFRAP1,S100A4,SIN3B,TP53,YWHAE,ZBTB16	0.61
ALL	1133	JNJ-26854165	targeted	MDM2	p53 pathway	SN-35	SRRM2	CASP3,EIF4E,NGFRAP1,S100A4,SNRPF,SRRM1,SRRM2	0.61
ALL	1133	JNJ-26854165	targeted	MDM2	p53 pathway	SN-36	MBD6	EXOSC8,MBD6,NFKB1,NGFR,NGFRAP1,RAN,TNPO1	0.61
ALL	1133	JNJ-26854165	targeted	MDM2	p53 pathway	SN-37	DNAH8	DNAH8,NGFRAP1,PAFAH1B1,TSPO,VWF,WDTC1,YWHAE	0.61
ALL	1133	JNJ-26854165	targeted	MDM2	p53 pathway	SN-38	NID2	CASP3,CTSS,HSPG2,ITGB1,NGFRAP1,NID1,NID2	0.61
ALL	1133	JNJ-26854165	targeted	MDM2	p53 pathway	SN-39	ZNF423	CEBPA,EBF1,NFKB1,NGF,NGFRAP1,WNT10B,ZNF423	0.61
ALL	1133	JNJ-26854165	targeted	MDM2	p53 pathway	SN-40	MYH2	AKT2,INSR,MYH2,NGFRAP1,TCIRG1,VAMP2,YWHAE	0.61
ALL	1158	XMD11-85h	targeted	BRSK2, FLT4, MARK4, PRKCD, RET, SPRK1	other	SN-01	TP53	DNTT,MGMT,TP53,WT1,XRCC5	1
ALL	1158	XMD11-85h	targeted	BRSK2, FLT4, MARK4, PRKCD, RET, SPRK1	other	SN-02	PFKFB2	AKT1,LCK,NRIP1,PFKFB2,WT1	1
ALL	1158	XMD11-85h	targeted	BRSK2, FLT4, MARK4, PRKCD, RET, SPRK1	other	SN-03	EGFR	DNTT,EGFR,PRKCB,PRKDC	1
ALL	1158	XMD11-85h	targeted	BRSK2, FLT4, MARK4, PRKCD, RET, SPRK1	other	SN-04	KALRN	GNAQ,KALRN,LCK,PRKCB,VAV3	1
ALL	1158	XMD11-85h	targeted	BRSK2, FLT4, MARK4, PRKCD, RET, SPRK1	other	SN-05	LRP1	CTSG,LRP1,PLAUR,SERPINB1,SRC,TRAT1	1
ALL	1158	XMD11-85h	targeted	BRSK2, FLT4, MARK4, PRKCD, RET, SPRK1	other	SN-06	SMC4	CCNB1,DNTT,HLTF,PCNA,PRKCB,SMC4,UBC	1
ALL	1158	XMD11-85h	targeted	BRSK2, FLT4, MARK4, PRKCD, RET, SPRK1	other	SN-07	CPSF1	CPSF1,ESR1,GNAQ,NRIP1,RBBP6	1
ALL	1158	XMD11-85h	targeted	BRSK2, FLT4, MARK4, PRKCD, RET, SPRK1	other	SN-08	NID2,TP53	CTSG,MMP1,NID1,NID2,SERPINB1,TP53,WT1	1
ALL	1158	XMD11-85h	targeted	BRSK2, FLT4, MARK4, PRKCD, RET, SPRK1	other	SN-09	CDK12,TP53	CCNK,CDK12,CDK6,HLTF,TP53,UBC,WT1	1
ALL	1158	XMD11-85h	targeted	BRSK2, FLT4, MARK4, PRKCD, RET, SPRK1	other	SN-10	DNMT3B	DNMT3A,DNMT3B,DNTT,MAX	1
ALL	1158	XMD11-85h	targeted	BRSK2, FLT4, MARK4, PRKCD, RET, SPRK1	other	SN-11	ABCA7	ABCA7,APOA1,DNTT,MAX,NFYA,NRIP1,TGS1	1
ALL	1158	XMD11-85h	targeted	BRSK2, FLT4, MARK4, PRKCD, RET, SPRK1	other	SN-12	SHANK2	ABL1,DNM2,DNTT,GNAQ,PCNA,SHANK2,VAV1	1
ALL	1158	XMD11-85h	targeted	BRSK2, FLT4, MARK4, PRKCD, RET, SPRK1	other	SN-13	OBSCN	GNAQ,OBSCN,OCRL,PLCB1	1
ALL	1158	XMD11-85h	targeted	BRSK2, FLT4, MARK4, PRKCD, RET, SPRK1	other	SN-14	CDC42BPA	CDC42,CDC42BPA,DNTT,FNBP1L,LCK,UBC,YES1	1
ALL	1158	XMD11-85h	targeted	BRSK2, FLT4, MARK4, PRKCD, RET, SPRK1	other	SN-15	USH2A	DNTT,MYC,NCOR1,NINL,TUBGCP3,USH2A,WT1	1
ALL	1158	XMD11-85h	targeted	BRSK2, FLT4, MARK4, PRKCD, RET, SPRK1	other	SN-16	LAG3	CD8A,GRAP2,LAG3,LCK,PRKCQ,TRAT1	1
ALL	1158	XMD11-85h	targeted	BRSK2, FLT4, MARK4, PRKCD, RET, SPRK1	other	SN-17	CRTC1	CRTC1,CTSG,DNTT,JUN,MMP1,NRIP1,UBC	1
ALL	1158	XMD11-85h	targeted	BRSK2, FLT4, MARK4, PRKCD, RET, SPRK1	other	SN-18	NID2	CD34,DNTT,GNAQ,HSPG2,NID2,SAA1,VEGFA	1
ALL	1158	XMD11-85h	targeted	BRSK2, FLT4, MARK4, PRKCD, RET, SPRK1	other	SN-19	CXADR	AMICA1,CD44,CXADR,HLTF,ITGA4,UBC,VCAM1	1
ALL	1158	XMD11-85h	targeted	BRSK2, FLT4, MARK4, PRKCD, RET, SPRK1	other	SN-20	NID2	GNAQ,HLTF,ITGB1,NID1,NID2,PIK3R1,UBC	1
ALL	1158	XMD11-85h	targeted	BRSK2, FLT4, MARK4, PRKCD, RET, SPRK1	other	SN-21	SNX33	AR,DNTT,NRIP1,SNX33,SNX9,TNK2,XRCC5	1
ALL	1158	XMD11-85h	targeted	BRSK2, FLT4, MARK4, PRKCD, RET, SPRK1	other	SN-22	FBN2	CTSG,FBN2,FURIN,MFAP5,SERPINB1,THBS1,TIMP2	1
ALL	1158	XMD11-85h	targeted	BRSK2, FLT4, MARK4, PRKCD, RET, SPRK1	other	SN-23	DNAH6	DCTN2,DNAH6,GNAQ,MARCKSL1,PRKACA	1
ALL	1158	XMD11-85h	targeted	BRSK2, FLT4, MARK4, PRKCD, RET, SPRK1	other	SN-24	COL14A1	CD44,COL14A1,DNTT,MMP7,MMP8,TIMP2,UBC	1
ALL	1158	XMD11-85h	targeted	BRSK2, FLT4, MARK4, PRKCD, RET, SPRK1	other	SN-25	SRRM2	DNTT,PRPF19,SF3A2,SRRM2,U2AF2,WBP11,WT1	1
ALL	1158	XMD11-85h	targeted	BRSK2, FLT4, MARK4, PRKCD, RET, SPRK1	other	SN-26	CELSR1	ARRB2,CELSR1,DNTT,GNAQ,ROR2,UBC,VANGL2	1
ALL	1158	XMD11-85h	targeted	BRSK2, FLT4, MARK4, PRKCD, RET, SPRK1	other	SN-27	USH2A	DCTN2,HLTF,MARCKSL1,NINL,UBC,USH2A,YWHAG	1
ALL	1158	XMD11-85h	targeted	BRSK2, FLT4, MARK4, PRKCD, RET, SPRK1	other	SN-28	OBSCN	ACTN1,ARHGEF1,GLUL,GNAQ,OBSCN,TTN,UBC	1
ALL	1158	XMD11-85h	targeted	BRSK2, FLT4, MARK4, PRKCD, RET, SPRK1	other	SN-29	TRPV3	DNTT,GLUL,TRPM8,TRPV3,UBC,USP10,XRCC6	1
ALL	1158	XMD11-85h	targeted	BRSK2, FLT4, MARK4, PRKCD, RET, SPRK1	other	SN-30	LTBR	BCL2,DNTT,LTBR,MAX,TNFSF13B,TRAF5,WT1	1
ALL	1158	XMD11-85h	targeted	BRSK2, FLT4, MARK4, PRKCD, RET, SPRK1	other	SN-31	MBD6	EXOSC8,LCK,MBD6,MYC,PRKCB,WT1,ZFP36L1	1
ALL	1158	XMD11-85h	targeted	BRSK2, FLT4, MARK4, PRKCD, RET, SPRK1	other	SN-32	MBD6	C1D,DNTT,EXOSC8,MBD6,NCOR2,NRIP1,PRKDC	1
ALL	1158	XMD11-85h	targeted	BRSK2, FLT4, MARK4, PRKCD, RET, SPRK1	other	SN-33	ALKBH7	ALKBH1,ALKBH7,ALKBH8,DNTT,TRMT112,UBC,YOD1	1
ALL	1158	XMD11-85h	targeted	BRSK2, FLT4, MARK4, PRKCD, RET, SPRK1	other	SN-34	RYR3	DNTT,FKBP1A,MTOR,MYC,PRKCB,RYR3,YY1	1
ALL	1158	XMD11-85h	targeted	BRSK2, FLT4, MARK4, PRKCD, RET, SPRK1	other	SN-35	TLN2	GNAQ,PIK3CA,TLN2,TRAT1,VCL	1
ALL	1158	XMD11-85h	targeted	BRSK2, FLT4, MARK4, PRKCD, RET, SPRK1	other	SN-36	HMCN1	CGA,HMCN1,INHBE,SIRPG	1
ALL	1158	XMD11-85h	targeted	BRSK2, FLT4, MARK4, PRKCD, RET, SPRK1	other	SN-37	ZNF423	DNTT,EBF1,PAX2,TGFB1,UBC,WT1,ZNF423	1
ALL	1158	XMD11-85h	targeted	BRSK2, FLT4, MARK4, PRKCD, RET, SPRK1	other	SN-38	LTBR	CD27,CD70,HLTF,LTBR,TNFRSF10A,TRAF2,UBC	1
ALL	1158	XMD11-85h	targeted	BRSK2, FLT4, MARK4, PRKCD, RET, SPRK1	other	SN-39	CELSR1	CELSR1,FZD6,WNT10A,WNT4,WT1	1
ALL	1158	XMD11-85h	targeted	BRSK2, FLT4, MARK4, PRKCD, RET, SPRK1	other	SN-40	DUOX2	DECR1,DUOX2,GSR,MGST1,PRKCB	1
ALL	1158	XMD11-85h	targeted	BRSK2, FLT4, MARK4, PRKCD, RET, SPRK1	other	SN-41	USH2A	ANK3,CNTN2,DNTT,NRCAM,UBC,USH1C,USH2A	1
ALL	1158	XMD11-85h	targeted	BRSK2, FLT4, MARK4, PRKCD, RET, SPRK1	other	SN-42	DNAH6	CYP2A6,DCTN1,DNAH6,GLUL,MGST1,PAFAH1B1,UBC	1
ALL	1158	XMD11-85h	targeted	BRSK2, FLT4, MARK4, PRKCD, RET, SPRK1	other	SN-43	TRPV3	ANK3,GNAQ,KCNQ2,TAC1,TRPM8,TRPV1,TRPV3	1
ALL	1175	AG-014699	targeted	PARP1, PARP2	Genome integrity	SN-01	PFKFB2	AKT1,LYN,MEF2C,PFKFB2	0.7
ALL	1175	AG-014699	targeted	PARP1, PARP2	Genome integrity	SN-02	LAG3	CD8A,LAG3,LCK,TRAT1	0.74
ALL	1175	AG-014699	targeted	PARP1, PARP2	Genome integrity	SN-03	TP53	IL1B,PYCARD,TP53	0.83
ALL	1175	AG-014699	targeted	PARP1, PARP2	Genome integrity	SN-04	NID2	HSPG2,MEF2C,NID2,NPPA	0.83
ALL	1175	AG-014699	targeted	PARP1, PARP2	Genome integrity	SN-05	USH2A	NGFRAP1,NINL,USH2A,YWHAE	0.83
ALL	1175	AG-014699	targeted	PARP1, PARP2	Genome integrity	SN-06	CRTC1	CRTC1,FOS,IL1B,LYN,TSPO	0.78
ALL	1175	AG-014699	targeted	PARP1, PARP2	Genome integrity	SN-07	ARID1A,TP53	ARID1A,MEF2C,NR3C1,SESN1,TP53	0.78
ALL	1175	AG-014699	targeted	PARP1, PARP2	Genome integrity	SN-08	LTBR	IL1B,LTBR,MAPK14,MEF2C,TRAF2	0.74
ALL	1175	AG-014699	targeted	PARP1, PARP2	Genome integrity	SN-09	HERC1,TP53	HERC1,LYN,MEF2C,PYCARD,TP53,UBC,UBE2I	0.74
ALL	1175	AG-014699	targeted	PARP1, PARP2	Genome integrity	SN-10	ZNF423	EBF1,HDAC3,IL1B,MEF2C,NFKB1,WNT10B,ZNF423	0.74
ALL	1175	AG-014699	targeted	PARP1, PARP2	Genome integrity	SN-11	SIN3B	MEF2C,NCOR2,NRIP1,SIN3B	0.7
ALL	1175	AG-014699	targeted	PARP1, PARP2	Genome integrity	SN-12	HMCN1	CGA,CREB1,HMCN1,IL1B,MEF2C,SIRPG,VEGFA	0.74
ALL	1175	AG-014699	targeted	PARP1, PARP2	Genome integrity	SN-13	SHANK2	CAMK2D,DLG4,MEF2C,SHANK2	0.74
ALL	1175	AG-014699	targeted	PARP1, PARP2	Genome integrity	SN-14	NEB	MEF2C,MYL2,MYLK,NEB	0.74
ALL	1175	AG-014699	targeted	PARP1, PARP2	Genome integrity	SN-15	ERCC6	CASP3,ERCC6,NGFRAP1,UBC	0.74
ALL	1175	AG-014699	targeted	PARP1, PARP2	Genome integrity	SN-16	FBN2	FBN2,FURIN,NGF,NGFRAP1	0.74
ALL	1175	AG-014699	targeted	PARP1, PARP2	Genome integrity	SN-17	RAD54L	ABL1,MEF2C,RAD52,RAD54L	0.74
ALL	1175	AG-014699	targeted	PARP1, PARP2	Genome integrity	SN-18	MBD6	AKT1,EXOSC8,IL1B,IL8,MBD6,MEF2C,ZFP36L1	0.74
ALL	1175	AG-014699	targeted	PARP1, PARP2	Genome integrity	SN-19	RYR3	FKBP1A,ITPR1,MEF2C,RYR3,SMAD3	0.74
ALL	1175	AG-014699	targeted	PARP1, PARP2	Genome integrity	SN-20	TRIO	CDC42,MEF2C,PTK2,TRIO	0.74
ALL	1175	AG-014699	targeted	PARP1, PARP2	Genome integrity	SN-21	ABCA7	ABCA7,APOA1,EP300,GSN,MEF2C,NRIP1,TTR	0.74
ALL	1175	AG-014699	targeted	PARP1, PARP2	Genome integrity	SN-22	FBN2	EFEMP1,FBN2,MEF2C,MFAP2,NOTCH1	0.74
ALL	1175	AG-014699	targeted	PARP1, PARP2	Genome integrity	SN-23	SNX33	ABL1,MEF2C,PTK2,SNX30,SNX33,SNX9,WASL	0.74
ALL	1175	AG-014699	targeted	PARP1, PARP2	Genome integrity	SN-24	LTBP1	JUN,LTBP1,MEF2C,TGFB1,TSPO,VWF	0.78
ALL	1175	AG-014699	targeted	PARP1, PARP2	Genome integrity	SN-25	MYCBP2	CD3D,GSPT2,MYCBP2,RAE1,TRAT1,UBC,UPF3B	0.74
ALL	1175	AG-014699	targeted	PARP1, PARP2	Genome integrity	SN-26	PYGM	CALM1,CAMK4,MEF2C,PHKB,PYGM	0.74
ALL	1175	AG-014699	targeted	PARP1, PARP2	Genome integrity	SN-27	CPSF1	CPSF1,CSTF1,MEF2C,POLR2A	0.74
ALL	1175	AG-014699	targeted	PARP1, PARP2	Genome integrity	SN-28	LAMA3	CDH2,LAMA3,LYN,MEF2C,PTK2,SRC,UTRN	0.74
ALL	1175	AG-014699	targeted	PARP1, PARP2	Genome integrity	SN-29	ALKBH7	ALKBH1,ALKBH7,ALKBH8,NGFRAP1,TRMT112,UBC,YWHAE	0.74
ALL	1175	AG-014699	targeted	PARP1, PARP2	Genome integrity	SN-30	SRRM2	GTF2F1,MAGOH,MEF2C,SRRM2	0.74
ALL	1175	AG-014699	targeted	PARP1, PARP2	Genome integrity	SN-31	EGFR,TRPV3	EGFR,IL1B,LYN,MMP1,TRPM8,TRPV1,TRPV3	0.74
ALL	1175	AG-014699	targeted	PARP1, PARP2	Genome integrity	SN-32	DNAH9	CDH2,DNAH9,DYNLL1,MAPK8,MEF2C,NGFRAP1,YWHAE	0.74
ALL	1175	AG-014699	targeted	PARP1, PARP2	Genome integrity	SN-33	ARID1A	ARID1A,LCK,LYN,MEF2C,RELA,SMAD3,VDR	0.74
ALL	1175	AG-014699	targeted	PARP1, PARP2	Genome integrity	SN-34	DUOX2	CDH2,DECR1,DUOX2,IL1B,MEF2C,RAC1,VCAM1	0.74
ALL	1175	AG-014699	targeted	PARP1, PARP2	Genome integrity	SN-35	CDK12,TP53	CASP3,CCNK,CDK12,MEF2C,NGFRAP1,POLR2A,TP53	0.74
ALL	1175	AG-014699	targeted	PARP1, PARP2	Genome integrity	SN-36	CXADR	AMICA1,CXADR,HDAC4,ITGA4,MEF2C,PTK2,YWHAZ	0.74
ALL	1175	AG-014699	targeted	PARP1, PARP2	Genome integrity	SN-37	RYR3	ACVR1,CDH2,ENG,FKBP1B,MEF2C,RYR3,SMAD7	0.74
ALL	1175	AG-014699	targeted	PARP1, PARP2	Genome integrity	SN-38	CXADR	AMICA1,CASP3,CXADR,IL1B,ITGB1,NGFRAP1,VEGFA	0.74
ALL	1175	AG-014699	targeted	PARP1, PARP2	Genome integrity	SN-39	MBD6	EXOSC8,LYN,MAPK3,MBD6,NGFRAP1,TSC1,ZFP36	0.74
ALL	1175	AG-014699	targeted	PARP1, PARP2	Genome integrity	SN-40	BCL11B	BCL11B,HDAC2,MEF2C,MEF2D	0.78
ALL	1175	AG-014699	targeted	PARP1, PARP2	Genome integrity	SN-41	NID2	MEF2C,MMP7,NGF,NGFRAP1,NID1,NID2,SOX18	0.78
ALL	1175	AG-014699	targeted	PARP1, PARP2	Genome integrity	SN-42	LHX5	CDH2,LHX5,LRP5,MEF2C,SFRP5,WNT7A,WNT8A	0.78
ALL	1175	AG-014699	targeted	PARP1, PARP2	Genome integrity	SN-43	MUC4	CDH2,LCK,MEF2C,MET,MUC1,MUC4,ST6GALNAC4	0.78
ALL	1192	GSK269962A	targeted	ROCK1, ROCK2	cytoskeleton	SN-01	EGFR	EGFR,ITGA6,SPRY1,STAT5A	0.61
ALL	1192	GSK269962A	targeted	ROCK1, ROCK2	cytoskeleton	SN-02	PCNT	CDK1,PCNT,PRKCB,RAB4A,STAT5A	0.65
ALL	1192	GSK269962A	targeted	ROCK1, ROCK2	cytoskeleton	SN-03	MYH2	FAS,MYH2,RHOA,STAT5A	0.74
ALL	1192	GSK269962A	targeted	ROCK1, ROCK2	cytoskeleton	SN-04	RYR1	FAS,HOMER3,IKBKB,RYR1,SPRY1,STAT5A,UBB	0.78
ALL	1192	GSK269962A	targeted	ROCK1, ROCK2	cytoskeleton	SN-05	LTBP1	CDH1,CDH4,LTBP1,STAT5A,TGFB1	0.74
ALL	1192	GSK269962A	targeted	ROCK1, ROCK2	cytoskeleton	SN-06	HERC1	HERC1,SPRY1,TUBB2A,UBC	0.83
ALL	1192	GSK269962A	targeted	ROCK1, ROCK2	cytoskeleton	SN-07	ARID1A	ARID1A,BIN2,EPS15,MIB2,SPRY1	0.78
ALL	1192	GSK269962A	targeted	ROCK1, ROCK2	cytoskeleton	SN-08	TRIO	RGS18,RHOA,SPRY1,STAT5A,TRIO,UBA52,XCL1	0.74
ALL	1192	GSK269962A	targeted	ROCK1, ROCK2	cytoskeleton	SN-09	LRP1	GRAP2,LRP1,SHC1,STAT5A	0.78
ALL	1192	GSK269962A	targeted	ROCK1, ROCK2	cytoskeleton	SN-10	LRP1	HBB,ITGA6,LRP1,NFE2,SRC,STAT5A,THBS1	0.74
ALL	1192	GSK269962A	targeted	ROCK1, ROCK2	cytoskeleton	SN-11	RAD54L	BRCA2,RAD51C,RAD54L,RECQL,SPRY1,STAT5A,UBC	0.74
ALL	1192	GSK269962A	targeted	ROCK1, ROCK2	cytoskeleton	SN-12	CPSF1,TP53	BIN2,CPSF1,HNRNPK,PAPOLA,STAT5A,TP53	0.74
ALL	1192	GSK269962A	targeted	ROCK1, ROCK2	cytoskeleton	SN-13	SIN3B,TP53	GATA2,HDAC3,HHEX,LMO2,SIN3B,STAT5A,TP53	0.78
ALL	1192	GSK269962A	targeted	ROCK1, ROCK2	cytoskeleton	SN-14	CDC42BPA	CDC42,CDC42BPA,GRAP2,RPS27A,SPRY1,STAT5A,YES1	0.78
ALL	1192	GSK269962A	targeted	ROCK1, ROCK2	cytoskeleton	SN-15	DUOX2	CDH2,CDH4,DECR1,DUOX2,MAPK14,STAT5A,TLR4	0.74
ALL	1192	GSK269962A	targeted	ROCK1, ROCK2	cytoskeleton	SN-16	DNAH8	DNAH8,NTRK1,SH3GL2,SPRY1	0.74
ALL	1192	GSK269962A	targeted	ROCK1, ROCK2	cytoskeleton	SN-17	CXADR	AMICA1,CXADR,ITGA4,ITGA6,RHOA,STAT5A,YWHAZ	0.74
ALL	1192	GSK269962A	targeted	ROCK1, ROCK2	cytoskeleton	SN-18	OBSCN	OBSCN,RAC1,RHOH,STAT5A	0.78
ALL	1192	GSK269962A	targeted	ROCK1, ROCK2	cytoskeleton	SN-19	LTBR	CD40,LTBR,STAT5A,TRAF5	0.7
ALL	1192	GSK269962A	targeted	ROCK1, ROCK2	cytoskeleton	SN-20	DNAH9	DNAH9,DYNLL1,ITGA6,NTRK1,SPRY1,UBC,YWHAG	0.74
ALL	1192	GSK269962A	targeted	ROCK1, ROCK2	cytoskeleton	SN-21	HMCN1	CD47,ERBB4,HMCN1,HRAS,SIRPG,SPRY1,STAT5A	0.7
ALL	1192	GSK269962A	targeted	ROCK1, ROCK2	cytoskeleton	SN-22	LAG3	CD8A,LAG3,PAG1,STAT5A	0.74
ALL	1192	GSK269962A	targeted	ROCK1, ROCK2	cytoskeleton	SN-23	FBN2	CBL,FBN2,FURIN,PDGFRA,SPRY1,STAT5A,TIMP2	0.78
ALL	1192	GSK269962A	targeted	ROCK1, ROCK2	cytoskeleton	SN-24	MYCBP2	KHDRBS3,MYCBP2,RAE1,RANBP2,SPRY1,U2AF2,UBC	0.74
ALL	1192	GSK269962A	targeted	ROCK1, ROCK2	cytoskeleton	SN-25	CELSR1	CELSR1,DVL1,FAS,FZD6,MAPK8,STAT5A,VANGL2	0.74
ALL	1192	GSK269962A	targeted	ROCK1, ROCK2	cytoskeleton	SN-26	ABCA7	ABCA7,APOA1,PPARA,SLC40A1,STAT5A,TF	0.78
ALL	1192	GSK269962A	targeted	ROCK1, ROCK2	cytoskeleton	SN-27	BCL11B	BCL11B,CDKN1A,HDAC1,STAT5A,ZBTB16	0.78
ALL	1192	GSK269962A	targeted	ROCK1, ROCK2	cytoskeleton	SN-28	COL14A1	CDH1,CDH4,COL14A1,COL4A6,MMP9,SPRY1,UBB	0.78
ALL	1192	GSK269962A	targeted	ROCK1, ROCK2	cytoskeleton	SN-29	SHANK2	DNM2,RAC1,SH3GL2,SHANK2,SPRY1,STAT5A,VAV1	0.78
ALL	1192	GSK269962A	targeted	ROCK1, ROCK2	cytoskeleton	SN-30	USH2A	CDK1,CDKN1A,ITGA6,NINL,STAT5A,USH2A,YWHAG	0.78
ALL	1192	GSK269962A	targeted	ROCK1, ROCK2	cytoskeleton	SN-31	RYR3	FAS,FKBP1A,MAP3K5,PPP3R1,RYR3,STAT5A,ZFYVE9	0.78
ALL	1192	GSK269962A	targeted	ROCK1, ROCK2	cytoskeleton	SN-32	ALKBH7	ALKBH1,ALKBH7,ALKBH8,PRKCB,STAT5A,TRMT112,UBC	0.78
ALL	1192	GSK269962A	targeted	ROCK1, ROCK2	cytoskeleton	SN-33	NID2	ADAMTS1,HSPG2,NID2,PRL,STAT5A,VEGFA	0.78
ALL	1192	GSK269962A	targeted	ROCK1, ROCK2	cytoskeleton	SN-34	SRRM2	CDC5L,CDKN1A,CDT1,KHDRBS3,SRRM2,STAT5A,U2AF2	0.83
ALL	1192	GSK269962A	targeted	ROCK1, ROCK2	cytoskeleton	SN-35	MBD6	EIF4G1,EXOSC8,MBD6,PARN,RPS4Y1,SPRY1,UBA52	0.78
ALL	1192	GSK269962A	targeted	ROCK1, ROCK2	cytoskeleton	SN-36	CDK12	CDK12,CDKN1A,RPS4Y1,SSRP1,STAT5A,SUPT5H,UBC	0.83
ALL	1192	GSK269962A	targeted	ROCK1, ROCK2	cytoskeleton	SN-37	LHX5	LHX5,RPS27A,RPS4Y1,SFRP5,SPRY1,WNT3A,WNT7A	0.78
ALL	1192	GSK269962A	targeted	ROCK1, ROCK2	cytoskeleton	SN-38	TRPV3	KRT18,TRPM8,TRPV3,USP10	0.83
ALL	1192	GSK269962A	targeted	ROCK1, ROCK2	cytoskeleton	SN-39	CPSF1	CPSF1,KRT1,MAGOH,RPS4Y1,SRRM1	0.83
ALL	1199	Tamoxifen	targeted	ER	other	SN-01	CRTC1	BAMBI,BMP4,CRTC1,JUN,MAP3K5	0.74
ALL	1199	Tamoxifen	targeted	ER	other	SN-02	ARID1A	ARID1A,BAMBI,BMP4,EGR1,IRF3,RORB,VDR	0.83
ALL	1199	Tamoxifen	targeted	ER	other	SN-03	EGFR,RYR1	ASS1,BAMBI,BMP4,CAV3,EGFR,NOS1,RYR1	0.7
ALL	1199	Tamoxifen	targeted	ER	other	SN-04	HERC1	BAMBI,BMP4,HERC1,LGR6,SMAD3,UBC,ZNRF3	0.83
ALL	1199	Tamoxifen	targeted	ER	other	SN-05	PCNT	BAMBI,HSP90AA1,LATS2,MAP3K5,PCNT,TGFBR1,YWHAE	0.78
ALL	1199	Tamoxifen	targeted	ER	other	SN-06	DUOX2	DECR1,DUOX2,IFITM1,MX2,OAS3,VCAM1	0.83
ALL	1199	Tamoxifen	targeted	ER	other	SN-07	TRPV3	BAMBI,MAP3K5,TGFBR2,TRPM8,TRPV3,UBC,USP10	0.78
ALL	1199	Tamoxifen	targeted	ER	other	SN-08	SNX33	BAMBI,BMP4,CDH1,CTTN,SNX33,SNX9,TNK2	0.7
ALL	1199	Tamoxifen	targeted	ER	other	SN-09	CPSF1	BAMBI,BMP4,CPSF1,NUDT21,PPP1CA,SF3A2,SYMPK	0.78
ALL	1199	Tamoxifen	targeted	ER	other	SN-10	CPSF1	ASS1,CPSF1,ESR1,NOS3,RBBP6,RORB	0.78
ALL	1199	Tamoxifen	targeted	ER	other	SN-11	DNAH6	BAMBI,BMP4,DCTN3,DCTN6,DNAH6,HSP90AA1,KIT	0.74
ALL	1199	Tamoxifen	targeted	ER	other	SN-12	DUOX2	ASS1,BAMBI,DECR1,DUOX2,FZD1,NOS3,TNF	0.74
ALL	1199	Tamoxifen	targeted	ER	other	SN-13	CXADR	AMICA1,BAMBI,BMP4,CXADR,ITGB1,MDK,VEGFA	0.74
ALL	1199	Tamoxifen	targeted	ER	other	SN-14	DNAH9	BAMBI,BMP4,DNAH9,DYNLL2,DYNLT1,FOXJ1,MAPK8	0.74
ALL	1199	Tamoxifen	targeted	ER	other	SN-15	PRPF8	ASS1,CPS1,PCBP1,PRPF8	0.78
ALL	1199	Tamoxifen	targeted	ER	other	SN-16	SNX33	ASS1,MAP3K5,NOS3,SNX33,SNX9,UBC,WASL	0.78
ALL	1199	Tamoxifen	targeted	ER	other	SN-17	ESPL1	BAMBI,DVL2,ESPL1,PSMD8	0.78
ALL	1199	Tamoxifen	targeted	ER	other	SN-18	LHX5	AXIN1,BAMBI,BMP4,LHX5,SFRP5,WNT3,WNT8A	0.74
ALL	1199	Tamoxifen	targeted	ER	other	SN-19	CDK12	ACVR1,BAMBI,CCNT1,CDK12	0.78
ALL	1199	Tamoxifen	targeted	ER	other	SN-20	CDK12	CDK12,IFITM1,IRF6,MX2,POLR2A,SRBD1,SUPT5H	0.74
ALL	1199	Tamoxifen	targeted	ER	other	SN-21	USH2A	BAMBI,BMP4,CTNNB1,DFNB31,NINL,USH2A,YWHAG	0.65
ALL	1199	Tamoxifen	targeted	ER	other	SN-22	MYCBP2	BAMBI,BMP4,FBXO45,MYCBP2,NUP153,RAE1,SMAD2	0.65
ALL	1199	Tamoxifen	targeted	ER	other	SN-23	NEB	ACTN2,BAMBI,NEB,TGFB1	0.65
ALL	1199	Tamoxifen	targeted	ER	other	SN-24	ZNF423	ASS1,BAMBI,EBF1,NOS2,RELA,TGFB1,ZNF423	0.7
ALL	1199	Tamoxifen	targeted	ER	other	SN-25	RYR3	BAMBI,FKBP1A,FKBP1B,RYR3	0.7
ALL	1199	Tamoxifen	targeted	ER	other	SN-26	FBN2	BAMBI,BMP4,EFEMP2,FBLN5,FBN2,MFAP2,NOTCH1	0.65
ALL	1199	Tamoxifen	targeted	ER	other	SN-27	ALKBH7	ALKBH1,ALKBH3,ALKBH7,ALKBH8,TK1,TRMT112,UBC	0.74
ALL	1199	Tamoxifen	targeted	ER	other	SN-28	KALRN	BAMBI,FZD5,GNG2,KALRN	0.74
ALL	1199	Tamoxifen	targeted	ER	other	SN-29	MBD6	AKT1,BAMBI,EXOSC8,KHSRP,MBD6,SMAD7,ZFP36	0.74
ALL	1199	Tamoxifen	targeted	ER	other	SN-30	LRP1	BAMBI,LRP1,SERPINE1,SMAD6	0.74
ALL	1199	Tamoxifen	targeted	ER	other	SN-31	CELSR1	BAMBI,BMP4,CELSR1,ROR2,RYK,VANGL2,WNT3A	0.7
ALL	1199	Tamoxifen	targeted	ER	other	SN-32	LTBR	ASS1,LTBR,MAP3K5,NMRAL1,TNFSF10,TRAF2,TRAF3	0.83
ALL	1199	Tamoxifen	targeted	ER	other	SN-33	PYGM	BAMBI,BMP4,MAX,PFKM,PYGM,TK1,WNT5A	0.74
ALL	1199	Tamoxifen	targeted	ER	other	SN-34	HERC1,TP53	HERC1,MAP3K5,PADI4,TNFRSF10A,TNFSF10,TP53,UBC	0.83
ALL	1199	Tamoxifen	targeted	ER	other	SN-35	SIN3B,TP53	BAMBI,BMP4,PADI4,PTCH1,SIN3B,SUFU,TP53	0.83
ALL	1199	Tamoxifen	targeted	ER	other	SN-36	DNAH8	BAMBI,BMP4,DNAH8,MYH14,MYOD1,RANBP2,TPR	0.78
ALL	1199	Tamoxifen	targeted	ER	other	SN-37	LAG3	BAMBI,BMP4,CD8A,EOMES,LAG3,RHOU,VAV1	0.74
ALL	1199	Tamoxifen	targeted	ER	other	SN-38	HMCN1	BAMBI,HMCN1,SIRPA,SIRPG,SKAP2,TGFB1,VWF	0.83
ALL	1199	Tamoxifen	targeted	ER	other	SN-39	CDC42BPA	CDC42,CDC42BPA,MAP3K5,RHOU	0.83
ALL	1218	JQ1	targeted	BRD2, BRD3, BRD4	chromatin other	SN-01	CRTC1	CRTC1,ESR1,FOS,RORB,TRIP6	0.78
ALL	1218	JQ1	targeted	BRD2, BRD3, BRD4	chromatin other	SN-02	ZNF423	CTHRC1,EBF1,FZD6,RYK,WNT1,ZNF423	0.96
ALL	1218	JQ1	targeted	BRD2, BRD3, BRD4	chromatin other	SN-03	RYR1	EGR1,RORB,RYR1,SRC,TRIP6,TRPC3,VDR	0.91
ALL	1218	JQ1	targeted	BRD2, BRD3, BRD4	chromatin other	SN-04	HERC1	DHFR,GGH,HERC1,UBC,UBE2E2	0.96
ALL	1218	JQ1	targeted	BRD2, BRD3, BRD4	chromatin other	SN-05	SHANK2	AHNAK,EZR,SHANK2,SLC9A3,SLC9A3R2,TRIP6	0.96
ALL	1218	JQ1	targeted	BRD2, BRD3, BRD4	chromatin other	SN-06	MUC4	GALNT12,GALNT6,GCNT1,MUC4	0.91
ALL	1218	JQ1	targeted	BRD2, BRD3, BRD4	chromatin other	SN-07	MYH2	GLIPR1,MED1,MYH2,RORB,SLC2A4	0.87
ALL	1218	JQ1	targeted	BRD2, BRD3, BRD4	chromatin other	SN-08	ABCA7	ABCA7,APOA1,HNF4A,RORB,SDC4	0.87
ALL	1218	JQ1	targeted	BRD2, BRD3, BRD4	chromatin other	SN-09	DNAH9	CDK5RAP2,DNAH9,DYNLL1,FPGS,GGH,PRKAR2B,UBC	0.87
ALL	1218	JQ1	targeted	BRD2, BRD3, BRD4	chromatin other	SN-10	DNAH8	DNAH8,LPAR2,NUDT19,P2RY1,SLC9A3R2,TRIP6,WDTC1	0.87
ALL	1218	JQ1	targeted	BRD2, BRD3, BRD4	chromatin other	SN-11	LRP1	APOC3,LRP1,PDGFRB,PPARA,RORB	0.87
ALL	1218	JQ1	targeted	BRD2, BRD3, BRD4	chromatin other	SN-12	MYCBP2	KHDRBS3,KRT1,MYCBP2,NCBP1,RAE1,U2AF2,UBC	0.91
ALL	1218	JQ1	targeted	BRD2, BRD3, BRD4	chromatin other	SN-13	LTBP1	LTBP1,NR2C2,RORB,TGFB1,VEGFC	0.87
ALL	1218	JQ1	targeted	BRD2, BRD3, BRD4	chromatin other	SN-14	RAD54L	DHFR,GGH,PCNA,RAD51C,RAD52,RAD54L,STAT5A	0.83
ALL	1218	JQ1	targeted	BRD2, BRD3, BRD4	chromatin other	SN-15	DNAH8	CDK1,DCTN3,DHFR,DNAH8,GGH,PRKAR2B,TPR	0.87
ALL	1218	JQ1	targeted	BRD2, BRD3, BRD4	chromatin other	SN-16	HMCN1	ACTN4,HMCN1,NUDT19,SIRPG,SLC9A3R2,VEGFC,VWF	0.87
ALL	1218	JQ1	targeted	BRD2, BRD3, BRD4	chromatin other	SN-17	FBN2	CTHRC1,DVL3,FBLN2,FBLN5,FBN2,MFAP2,NOTCH1	0.87
ALL	1218	JQ1	targeted	BRD2, BRD3, BRD4	chromatin other	SN-18	SRRM2	AR,PRPF6,RORB,SRRM2	0.87
ALL	1218	JQ1	targeted	BRD2, BRD3, BRD4	chromatin other	SN-19	MYH2	CTHRC1,DVL1,MYH2,RHOA,STAT5A	0.83
ALL	1218	JQ1	targeted	BRD2, BRD3, BRD4	chromatin other	SN-20	RYR1	DHFR,GCHFR,GGH,PTS,QDPR,RYR1,SPR	0.83
ALL	1218	JQ1	targeted	BRD2, BRD3, BRD4	chromatin other	SN-21	ESPL1	CTHRC1,DVL1,ESPL1,PSMD6,UBC,UBE2E2,ZWINT	0.83
ALL	1218	JQ1	targeted	BRD2, BRD3, BRD4	chromatin other	SN-22	SRRM2	DHFR,GGH,HSPD1,KHDRBS3,SF3A2,SRRM2,U2AF2	0.78
ALL	1218	JQ1	targeted	BRD2, BRD3, BRD4	chromatin other	SN-23	LAG3	CD8A,CTHRC1,FZD6,GNB1,LAG3,STAT5A,VAV1	0.78
ALL	1218	JQ1	targeted	BRD2, BRD3, BRD4	chromatin other	SN-24	CXADR	AMICA1,CXADR,IFI30,ITGB1,VCAM1,VEGFC,ZYX	0.78
ALL	1218	JQ1	targeted	BRD2, BRD3, BRD4	chromatin other	SN-25	ALKBH7	ALKBH1,ALKBH7,ALKBH8,RORB,TRMT112,UBC,VDR	0.78
ALL	1218	JQ1	targeted	BRD2, BRD3, BRD4	chromatin other	SN-26	EGFR,TRPV3	EGFR,SPRY1,STAT5A,TRPM8,TRPV1,TRPV3	0.78
ALL	1218	JQ1	targeted	BRD2, BRD3, BRD4	chromatin other	SN-27	LHX5	CTHRC1,DVL1,LHX5,RYK,SFRP5,WNT5A,WNT7B	0.78
ALL	1218	JQ1	targeted	BRD2, BRD3, BRD4	chromatin other	SN-28	LTBR	CISH,LTBR,RPS4Y1,STAT1,STAT5A,TRAF2,UBC	0.78
ALL	1218	JQ1	targeted	BRD2, BRD3, BRD4	chromatin other	SN-29	TRPV3	CTHRC1,DVL1,PSMD2,TRPM8,TRPV3,USP10,WAPAL	0.78
ALL	1218	JQ1	targeted	BRD2, BRD3, BRD4	chromatin other	SN-30	MBD6	DHFR,EXOSC8,GGH,MBD6,PNPT1,RRM2,ZFP36	0.83
ALL	1218	JQ1	targeted	BRD2, BRD3, BRD4	chromatin other	SN-31	USH2A	CSNK1D,CTHRC1,DVL1,NINL,PRKAR2B,TUBGCP5,USH2A	0.83
ALL	1218	JQ1	targeted	BRD2, BRD3, BRD4	chromatin other	SN-32	PFKFB2	AKT1,PFKFB2,RARA,RORB,STAT5A,UBC,UBE2E2	0.83
ALL	1218	JQ1	targeted	BRD2, BRD3, BRD4	chromatin other	SN-33	SIN3B,TP53	CISH,RORB,SIN3B,STAT5A,TP53,VDR,ZBTB16	0.83
ALL	1218	JQ1	targeted	BRD2, BRD3, BRD4	chromatin other	SN-34	OBSCN	CTHRC1,DVL1,OBSCN,RAC1,TPM4,TRIP6,TTN	0.83
ALL	1218	JQ1	targeted	BRD2, BRD3, BRD4	chromatin other	SN-35	NEB	ESR1,NEB,RORB,STAT5A,TTN,TUBA1C,TUBA4A	0.87
ALL	1218	JQ1	targeted	BRD2, BRD3, BRD4	chromatin other	SN-36	ABCA7	ABCA7,APOA1,DHFR,GGH,GLIPR1,SP1,TBL1XR1	0.87
ALL	1218	JQ1	targeted	BRD2, BRD3, BRD4	chromatin other	SN-37	DNMT3B	DNMT3B,EGR1,SUMO1,UBE2E2	0.87
ALL	1218	JQ1	targeted	BRD2, BRD3, BRD4	chromatin other	SN-38	LRP1	LRP1,PLAU,SERPINE2,TRIP6	0.87
ALL	1218	JQ1	targeted	BRD2, BRD3, BRD4	chromatin other	SN-39	SIN3B	DHFR,ESR1,GGH,RBL2,RORB,SIN3B,UBE3A	0.83
ALL	1218	JQ1	targeted	BRD2, BRD3, BRD4	chromatin other	SN-40	DUOX2	CISH,DECR1,DHFR,DUOX2,GGH,SOCS3,TNF	0.87
ALL	1218	JQ1	targeted	BRD2, BRD3, BRD4	chromatin other	SN-41	RYR3	BAMBI,CTHRC1,FKBP1A,FZD5,RYR3	0.83
ALL	1218	JQ1	targeted	BRD2, BRD3, BRD4	chromatin other	SN-42	MBD6	EXOSC8,MBD6,MYC,NR2F1,RORB,STAT5A,ZFP36L1	0.83
ALL	1218	JQ1	targeted	BRD2, BRD3, BRD4	chromatin other	SN-43	TLN2	CTHRC1,DVL1,IFI30,ITGB2,PROC,TLN2,VCAM1	0.83
ALL	1218	JQ1	targeted	BRD2, BRD3, BRD4	chromatin other	SN-44	HMCN1	ERBB4,HMCN1,MED1,RORB,SIRPG,STAT5A,YAP1	0.78
ALL	1218	JQ1	targeted	BRD2, BRD3, BRD4	chromatin other	SN-45	SNX33	AXIN1,CTHRC1,CTNNA1,DNM2,DVL1,SNX33,SNX9	0.74
ALL	1218	JQ1	targeted	BRD2, BRD3, BRD4	chromatin other	SN-46	CDK12	CDK12,ESR1,KHDRBS3,POLR2A,RORB,SUPT5H,U2AF2	0.74
ALL	1218	JQ1	targeted	BRD2, BRD3, BRD4	chromatin other	SN-47	RAD54L	BRCA1,PGR,RAD51C,RAD54L,RORB,SPO11,UBE2E2	0.74
ALL	1218	JQ1	targeted	BRD2, BRD3, BRD4	chromatin other	SN-48	COL14A1	COL14A1,COL18A1,ESR1,KRT1,LEF1,MMP9,RORB	0.74
ALL	1218	JQ1	targeted	BRD2, BRD3, BRD4	chromatin other	SN-49	BCL11B	BCL11B,CTHRC1,DVL1,HDAC1,NOTCH1,NR0B2,RORB	0.78
ALL	1219	PFI-1	targeted	BRD2, BRD3, BRD4	chromatin other	SN-01	SRRM2	MAGOH,RPS4Y1,SRRM2	0.87
ALL	1219	PFI-1	targeted	BRD2, BRD3, BRD4	chromatin other	SN-02	LRP1	HSP90AA1,LRP1,RPS4Y1,UBA52	0.87
ALL	1219	PFI-1	targeted	BRD2, BRD3, BRD4	chromatin other	SN-03	USH2A	NINL,PPP2R1A,RPS4Y1,USH2A	0.87
ALL	1219	PFI-1	targeted	BRD2, BRD3, BRD4	chromatin other	SN-04	ZNF423	EBF1,LYN,NFKB1,ZNF423	0.87
ALL	1219	PFI-1	targeted	BRD2, BRD3, BRD4	chromatin other	SN-05	PRPF8	POLR2L,PRPF8,RNPS1,RPS4Y1	0.91
ALL	1219	PFI-1	targeted	BRD2, BRD3, BRD4	chromatin other	SN-06	CDC42BPA	CDC42,CDC42BPA,RPS27A,RPS4Y1	0.91
ALL	1219	PFI-1	targeted	BRD2, BRD3, BRD4	chromatin other	SN-07	CPSF1	CPSF1,ESR1,RBBP6,RORB,RPS4Y1,UBC	0.91
ALL	1219	PFI-1	targeted	BRD2, BRD3, BRD4	chromatin other	SN-08	PFKFB2	AKT1,LYN,MEF2C,PFKFB2	0.83
ALL	1219	PFI-1	targeted	BRD2, BRD3, BRD4	chromatin other	SN-09	LAG3	BCL2,CD8A,LAG3,PPP2CA,RPS4Y1,TRAT1	0.87
ALL	1219	PFI-1	targeted	BRD2, BRD3, BRD4	chromatin other	SN-10	MUC4,TP53	LYN,MUC1,MUC4,PADI4,TP53	0.78
ALL	1219	PFI-1	targeted	BRD2, BRD3, BRD4	chromatin other	SN-11	ABCA7	ABCA7,APOA1,LDLR,NCBP2,RPS4Y1,TGS1	0.74
ALL	1219	PFI-1	targeted	BRD2, BRD3, BRD4	chromatin other	SN-12	MUC4	GALNT2,MRPS5,MUC4,RPS4Y1	0.78
ALL	1219	PFI-1	targeted	BRD2, BRD3, BRD4	chromatin other	SN-13	DNAH6	CLIP1,DNAH6,RPS27,RPS4Y1	0.78
ALL	1219	PFI-1	targeted	BRD2, BRD3, BRD4	chromatin other	SN-14	COL14A1	COL14A1,COL17A1,PLEC,RPS4Y1	0.74
ALL	1219	PFI-1	targeted	BRD2, BRD3, BRD4	chromatin other	SN-15	DNAH8	DNAH8,PAFAH1B1,RPS4Y1,SRPRB,TUBA1C	0.74
ALL	1219	PFI-1	targeted	BRD2, BRD3, BRD4	chromatin other	SN-16	SIN3B,TP53	RPS27L,RPS4Y1,SIN3B,TP53	0.74
ALL	1219	PFI-1	targeted	BRD2, BRD3, BRD4	chromatin other	SN-17	ALKBH7	ALKBH1,ALKBH7,ALKBH8,RPS4Y1,TRMT112,UBC,ZMYM3	0.83
ALL	1219	PFI-1	targeted	BRD2, BRD3, BRD4	chromatin other	SN-18	MYCBP2	MYCBP2,NCBP1,RAE1,RPS4Y1	0.83
ALL	1219	PFI-1	targeted	BRD2, BRD3, BRD4	chromatin other	SN-19	RYR3	FKBP1A,INHBA,INHBE,LYN,RYR3,SNCA	0.74
ALL	1219	PFI-1	targeted	BRD2, BRD3, BRD4	chromatin other	SN-20	EGFR,TRPV3	EGFR,LYN,TRPM8,TRPV1,TRPV3	0.74
ALL	1219	PFI-1	targeted	BRD2, BRD3, BRD4	chromatin other	SN-21	MBD6	EXOSC8,MBD6,RPS4Y1,UPF1,XRN1	0.74
ALL	1219	PFI-1	targeted	BRD2, BRD3, BRD4	chromatin other	SN-22	DNAH9	DNAH9,DYNLL1,FOXJ1,NINL,OPTN,RPS4Y1,UBC	0.78
ALL	1219	PFI-1	targeted	BRD2, BRD3, BRD4	chromatin other	SN-23	LHX5	FZD4,LHX5,RPS4Y1,SFRP5,UBA52,WNT3,WNT7B	0.7
ALL	1219	PFI-1	targeted	BRD2, BRD3, BRD4	chromatin other	SN-24	SHANK2	CTTN,DNM2,HSPA8,LYN,MAGOH,RPS4Y1,SHANK2	0.78
ALL	1219	PFI-1	targeted	BRD2, BRD3, BRD4	chromatin other	SN-25	FBN2	FBN2,LCK,LYN,MFAP2,NOTCH1,RPS4Y1,UBA52	0.87
ALL	1219	PFI-1	targeted	BRD2, BRD3, BRD4	chromatin other	SN-26	CDK12,TP53	CCNK,CDK12,CDK6,PADI4,RPS4Y1,TP53,UBC	0.87
ALL	1219	PFI-1	targeted	BRD2, BRD3, BRD4	chromatin other	SN-27	ARID1A,TP53	ARID1A,CREBBP,MEF2C,PADI4,RORB,TP53,VDR	0.78
ALL	1219	PFI-1	targeted	BRD2, BRD3, BRD4	chromatin other	SN-28	LAMA3	ACTA1,LAMA3,MAL,MEF2C,RPS4Y1,RPSA	0.83
ALL	1219	PFI-1	targeted	BRD2, BRD3, BRD4	chromatin other	SN-29	PCNT	LYN,NRAS,PCNT,RPS4Y1,TUBG1,UBC,YWHAG	0.83
ALL	1219	PFI-1	targeted	BRD2, BRD3, BRD4	chromatin other	SN-30	HMCN1	HMCN1,LYN,SIRPG,SYK,TRAT1,VWF	0.78
ALL	1219	PFI-1	targeted	BRD2, BRD3, BRD4	chromatin other	SN-31	DUOX2	AKT1,DECR1,DUOX2,DUOXA1,MEF2C,RPS4Y1,UBA52	0.74
ALL	1219	PFI-1	targeted	BRD2, BRD3, BRD4	chromatin other	SN-32	RAD54L	LYN,PPP2CA,PRKDC,RAD52,RAD54L,RPS4Y1,XPA	0.7
ALL	1219	PFI-1	targeted	BRD2, BRD3, BRD4	chromatin other	SN-33	CXADR	AMICA1,CXADR,ITGB1,MYLK,RPS4Y1,UBC,YWHAZ	0.74
ALL	1219	PFI-1	targeted	BRD2, BRD3, BRD4	chromatin other	SN-34	HMCN1	CGA,HMCN1,INHBE,NPSR1,RPS4Y1,SIRPG,TSHR	0.78
ALL	1219	PFI-1	targeted	BRD2, BRD3, BRD4	chromatin other	SN-35	CELSR1	ARRB2,CELSR1,LYN,ROR2,RPS27A,RPS4Y1,VANGL2	0.74
ALL	1219	PFI-1	targeted	BRD2, BRD3, BRD4	chromatin other	SN-36	FBN2	CTNNB1,FBN1,FBN2,MEF2C,RPS4Y1,UBC,VCAN	0.78
ALL	1219	PFI-1	targeted	BRD2, BRD3, BRD4	chromatin other	SN-37	SRRM2	DHX9,LYN,NFKB1,RPS4Y1,SF3A2,SRRM2,UPF3B	0.78
ALL	1219	PFI-1	targeted	BRD2, BRD3, BRD4	chromatin other	SN-38	RYR1	FKBP1A,ITPR1,LYN,PPP2R2A,RPS4Y1,RYR1,TGFBR1	0.78
ALL	1219	PFI-1	targeted	BRD2, BRD3, BRD4	chromatin other	SN-39	NID2	LAMB2,LYN,NID1,NID2,RPS4Y1,RPSA,SRC	0.78
ALL	1219	PFI-1	targeted	BRD2, BRD3, BRD4	chromatin other	SN-40	LTBP1	FN1,LTBP1,LYN,PPP2R1A,RPS4Y1,SYK,YWHAZ	0.78
ALL	1236	UNC0638	targeted	G9a(EHMT2), GLP(EHMT1)	chromatin histone methylation	SN-01	DNMT3B	CDH2,DNMT3B,SUMO1,ZEB1	0.78
ALL	1236	UNC0638	targeted	G9a(EHMT2), GLP(EHMT1)	chromatin histone methylation	SN-02	FBN2	CDH2,FBN2,MFAP2,MFAP4,NOTCH1	0.83
ALL	1236	UNC0638	targeted	G9a(EHMT2), GLP(EHMT1)	chromatin histone methylation	SN-03	EGFR	CDH2,EGFR,GRAP2,SRC	0.74
ALL	1236	UNC0638	targeted	G9a(EHMT2), GLP(EHMT1)	chromatin histone methylation	SN-04	LTBP1	CDH2,LTBP1,SMAD1,SNAI1,TGFB1	0.74
ALL	1236	UNC0638	targeted	G9a(EHMT2), GLP(EHMT1)	chromatin histone methylation	SN-05	DNAH8	CDH2,DNAH8,NTRK1,NTRK2,RAN,RGPD1,TPR	0.74
ALL	1236	UNC0638	targeted	G9a(EHMT2), GLP(EHMT1)	chromatin histone methylation	SN-06	CDC42BPA	CD3D,CDC42,CDC42BPA,CDH2,UBC	0.78
ALL	1236	UNC0638	targeted	G9a(EHMT2), GLP(EHMT1)	chromatin histone methylation	SN-07	OBSCN	CDH2,OBSCN,RHOA,RHOU	0.7
ALL	1236	UNC0638	targeted	G9a(EHMT2), GLP(EHMT1)	chromatin histone methylation	SN-08	DNAH9	CDH2,DNAH9,DYNLL2,MAPK8	0.78
ALL	1236	UNC0638	targeted	G9a(EHMT2), GLP(EHMT1)	chromatin histone methylation	SN-09	LAMA3	ACTA1,CDH2,LAMA3,MAL,RAC1	0.7
ALL	1236	UNC0638	targeted	G9a(EHMT2), GLP(EHMT1)	chromatin histone methylation	SN-10	LTBR	CDH2,LTBR,MAPK14,TRAF2	0.78
ALL	1236	UNC0638	targeted	G9a(EHMT2), GLP(EHMT1)	chromatin histone methylation	SN-11	SMC4	CCND1,CDH2,CDK1,SMC4	0.78
ALL	1236	UNC0638	targeted	G9a(EHMT2), GLP(EHMT1)	chromatin histone methylation	SN-12	OBSCN	CD3D,CDH2,GRAP2,OBSCN,RAC1,TTN,VCL	0.78
ALL	1236	UNC0638	targeted	G9a(EHMT2), GLP(EHMT1)	chromatin histone methylation	SN-13	RYR3	CDH2,CREBBP,FKBP1A,RYR3,YY1	0.74
ALL	1236	UNC0638	targeted	G9a(EHMT2), GLP(EHMT1)	chromatin histone methylation	SN-14	RAD54L	ABL1,CDH2,RAD52,RAD54L	0.74
ALL	1236	UNC0638	targeted	G9a(EHMT2), GLP(EHMT1)	chromatin histone methylation	SN-15	SRRM2	CDH2,MFAP1,MFAP4,PTPN1,SF3A2,SRRM2,YBX1	0.78
ALL	1236	UNC0638	targeted	G9a(EHMT2), GLP(EHMT1)	chromatin histone methylation	SN-16	COL14A1	CDH2,COL14A1,COL2A1,MMP9	0.78
ALL	1236	UNC0638	targeted	G9a(EHMT2), GLP(EHMT1)	chromatin histone methylation	SN-17	LAG3	CD3D,CD8A,CDH2,LAG3,PIK3CA,TRAT1,ZAP70	0.78
ALL	1236	UNC0638	targeted	G9a(EHMT2), GLP(EHMT1)	chromatin histone methylation	SN-18	CDK12	CDH2,CDK12,PPT2,SUPT5H	0.78
ALL	1236	UNC0638	targeted	G9a(EHMT2), GLP(EHMT1)	chromatin histone methylation	SN-19	ESPL1	BIRC5,CDH2,CTNNB1,ESPL1	0.78
ALL	1236	UNC0638	targeted	G9a(EHMT2), GLP(EHMT1)	chromatin histone methylation	SN-20	CELSR1	CDH2,CELSR1,FZD6,LRP6	0.78
ALL	1236	UNC0638	targeted	G9a(EHMT2), GLP(EHMT1)	chromatin histone methylation	SN-21	LHX5	CDH1,CDH2,LHX5,SFRP5,WNT7A,WNT8A,ZEB1	0.78
ALL	1236	UNC0638	targeted	G9a(EHMT2), GLP(EHMT1)	chromatin histone methylation	SN-22	TRPV3	CDH2,SRC,TRAT1,TRPM8,TRPV1,TRPV3,WWOX	0.78
ALL	1236	UNC0638	targeted	G9a(EHMT2), GLP(EHMT1)	chromatin histone methylation	SN-23	DUOX2	AKT1,CDH2,DECR1,DUOX2	0.74
ALL	1236	UNC0638	targeted	G9a(EHMT2), GLP(EHMT1)	chromatin histone methylation	SN-24	NEB	ACTN2,CDH2,CTNNA1,NEB	0.74
ALL	1236	UNC0638	targeted	G9a(EHMT2), GLP(EHMT1)	chromatin histone methylation	SN-25	ABCA7	ABCA7,APOA1,CDH2,CREBBP,SLC40A1,TBL1X,TF	0.78
ALL	1236	UNC0638	targeted	G9a(EHMT2), GLP(EHMT1)	chromatin histone methylation	SN-26	NID2	ADAMTS1,CDH2,MMP9,NID1,NID2,TIMP2,VEGFA	0.78
ALL	1236	UNC0638	targeted	G9a(EHMT2), GLP(EHMT1)	chromatin histone methylation	SN-27	ARID1A	ARID1A,CDH2,TCF3,VDR	0.78
ALL	1236	UNC0638	targeted	G9a(EHMT2), GLP(EHMT1)	chromatin histone methylation	SN-28	ALKBH7	ALKBH1,ALKBH7,ALKBH8,CDH2,GJA1,TRMT112,UBC	0.78
ALL	1236	UNC0638	targeted	G9a(EHMT2), GLP(EHMT1)	chromatin histone methylation	SN-29	CXADR	AMICA1,CDH2,CXADR,ITGB1,PIK3R1	0.78
ALL	1236	UNC0638	targeted	G9a(EHMT2), GLP(EHMT1)	chromatin histone methylation	SN-30	HMCN1	CD3D,CDH2,HMCN1,PTPN11,SIRPA,SIRPG,VAV1	0.78
ALL	1236	UNC0638	targeted	G9a(EHMT2), GLP(EHMT1)	chromatin histone methylation	SN-31	LRP1	CANX,CD3D,CD74,CDH2,HSP90B1,LRP1,SRC	0.78
ALL	1236	UNC0638	targeted	G9a(EHMT2), GLP(EHMT1)	chromatin histone methylation	SN-32	CRTC1	CD3D,CDH2,CREB1,CRTC1,JUN,NTRK2,SGK1	0.78
ALL	1236	UNC0638	targeted	G9a(EHMT2), GLP(EHMT1)	chromatin histone methylation	SN-33	RYR3	CAMK2D,CDH2,FKBP1B,PARP1,RYR2,RYR3,ZEB1	0.78
ALL	1236	UNC0638	targeted	G9a(EHMT2), GLP(EHMT1)	chromatin histone methylation	SN-34	DNAH6	CDH2,CLIP1,CTNND1,DNAH6,IQGAP1	0.78
ALL	1236	UNC0638	targeted	G9a(EHMT2), GLP(EHMT1)	chromatin histone methylation	SN-35	MBD6	CDH2,EXOSC8,KHSRP,MBD6,UBC,VCL,ZFP36	0.78
ALL	1236	UNC0638	targeted	G9a(EHMT2), GLP(EHMT1)	chromatin histone methylation	SN-36	NID2	CD74,CDH2,CTNNB1,CTSS,HSPG2,NID2,VCAN	0.78
ALL	1236	UNC0638	targeted	G9a(EHMT2), GLP(EHMT1)	chromatin histone methylation	SN-37	SNX33	CD74,CDH2,DNM2,SNX33,SNX9,VCL,WASL	0.78
ALL	1236	UNC0638	targeted	G9a(EHMT2), GLP(EHMT1)	chromatin histone methylation	SN-38	KALRN	ARHGAP32,CDH2,KALRN,UTS2	0.78
ALL	1236	UNC0638	targeted	G9a(EHMT2), GLP(EHMT1)	chromatin histone methylation	SN-39	MUC4	CDH2,ERBB2,JUP,MUC4	0.78
ALL	1236	UNC0638	targeted	G9a(EHMT2), GLP(EHMT1)	chromatin histone methylation	SN-40	PYGM	AKT1,ALDOC,CDH2,PFKM,PYGM,SMAD1,UBC	0.78
ALL	1236	UNC0638	targeted	G9a(EHMT2), GLP(EHMT1)	chromatin histone methylation	SN-41	USH2A	ACAA2,CDH2,PTPN1,TAX1BP3,TXN,USH1C,USH2A	0.78
ALL	1236	UNC0638	targeted	G9a(EHMT2), GLP(EHMT1)	chromatin histone methylation	SN-42	ZNF423	CD74,CDH2,EBF1,NOTCH1,SEC23A,SREBF2,ZNF423	0.78
ALL	1236	UNC0638	targeted	G9a(EHMT2), GLP(EHMT1)	chromatin histone methylation	SN-43	PCNT	CDH2,CTNNB1,HSP90AA1,MAP3K5,PCNT,SGK1,YWHAG	0.78
ALL	1236	UNC0638	targeted	G9a(EHMT2), GLP(EHMT1)	chromatin histone methylation	SN-44	TRIO	APP,CDH2,PSEN1,TRIO	0.83
ALL	1259	BMN-673	targeted	PARP1	Genome integrity	SN-01	TRIO	CTSG,F2R,GNA15,SERPINB1,TRIO,UTS2D	0.78
ALL	1259	BMN-673	targeted	PARP1	Genome integrity	SN-02	ESPL1	CBS,ESPL1,REC8,UBC	0.78
ALL	1259	BMN-673	targeted	PARP1	Genome integrity	SN-03	LTBP1	CTSG,GATA3,IGF2,LTBP1,SERPINB1,TGFB1,VEGFC	0.78
ALL	1259	BMN-673	targeted	PARP1	Genome integrity	SN-04	OBSCN	CTSG,F2RL2,OBSCN,RHOC,RHOG,SERPINB1,TRIP10	0.78
ALL	1259	BMN-673	targeted	PARP1	Genome integrity	SN-05	USH2A	CTSG,IGF1,NINL,SERPINB1,USH2A,YWHAE,YWHAH	0.78
ALL	1259	BMN-673	targeted	PARP1	Genome integrity	SN-06	TLN2	CDH2,CTSG,ITGB1,SERPINB1,THBS1,TLN2,VCL	0.78
ALL	1259	BMN-673	targeted	PARP1	Genome integrity	SN-07	LAMA3	LAMA3,LYN,PXN	0.78
ALL	1259	BMN-673	targeted	PARP1	Genome integrity	SN-08	DUOX2	ACE2,CTSG,DECR1,DUOX2,SERPINB1,TNF,XDH	0.83
ALL	1259	BMN-673	targeted	PARP1	Genome integrity	SN-09	PYGM	AKT1,C12orf5,CBS,LYN,PFKM,PYGM,UBC	0.83
ALL	1259	BMN-673	targeted	PARP1	Genome integrity	SN-10	SIN3B	BACH2,CYP26A1,MEF2C,NCOR2,SIN3B,TGIF1	0.83
ALL	1259	BMN-673	targeted	PARP1	Genome integrity	SN-11	OBSCN	BCR,BLNK,LYN,OBSCN	0.83
ALL	1259	BMN-673	targeted	PARP1	Genome integrity	SN-12	DNAH8	CTSG,DCTN6,DNAH8,F2RL1,P2RY1,SERPINB1,WDTC1	0.83
ALL	1259	BMN-673	targeted	PARP1	Genome integrity	SN-13	LHX5	ATP6AP2,CTSG,LHX5,REN,SERPINB1,SFRP5,WNT3A	0.83
ALL	1259	BMN-673	targeted	PARP1	Genome integrity	SN-14	PCNT	CBS,HTT,OPTN,PCNT	0.83
ALL	1259	BMN-673	targeted	PARP1	Genome integrity	SN-15	RYR3	BMPR2,FKBP1A,LYN,MYC,PPP1R15A,RYR3,YY1	0.83
ALL	1259	BMN-673	targeted	PARP1	Genome integrity	SN-16	PYGM	ASNS,GOT1,GPT2,MDH1,PGM1,PYGM	0.83
ALL	1259	BMN-673	targeted	PARP1	Genome integrity	SN-17	LTBR	DDIT3,LTBR,LYN,MAPK14,TRAF2	0.83
ALL	1259	BMN-673	targeted	PARP1	Genome integrity	SN-18	MUC4,TP53	LYN,MUC1,MUC4,SESN1,ST6GAL1,TP53	0.83
ALL	1259	BMN-673	targeted	PARP1	Genome integrity	SN-19	ZNF423	EBF1,LYN,NFKB1,ZNF423	0.83
ALL	1259	BMN-673	targeted	PARP1	Genome integrity	SN-20	RAD54L	ABL1,LYN,RAD51,RAD54L,REC8,UBE2I	0.83
ALL	1259	BMN-673	targeted	PARP1	Genome integrity	SN-21	SMC4	CDK1,LYN,NCAPG,SMC4	0.83
ALL	1259	BMN-673	targeted	PARP1	Genome integrity	SN-22	DNAH9	DNAH9,DYNLL1,GPHN,NGFRAP1,YWHAE	0.83
ALL	1259	BMN-673	targeted	PARP1	Genome integrity	SN-23	SHANK2	CTTN,LYN,MYLK,SHANK2	0.83
ALL	1259	BMN-673	targeted	PARP1	Genome integrity	SN-24	NEB	NEB,TNNT1,TPM3	0.83
ALL	1259	BMN-673	targeted	PARP1	Genome integrity	SN-25	MBD6	C1D,EXOSC8,IL8,LYN,MBD6	0.87
ALL	1259	BMN-673	targeted	PARP1	Genome integrity	SN-26	HMCN1	ERBB4,HMCN1,LYN,PIK3CG,SIRPG	0.87
ALL	1259	BMN-673	targeted	PARP1	Genome integrity	SN-27	LAG3	CD8A,LAG3,LCK,LYN,NCKAP1,TRAT1,VAV1	0.87
ALL	1259	BMN-673	targeted	PARP1	Genome integrity	SN-28	SNX33	DNM1,HCK,LYN,SNX30,SNX33,SNX9	0.87
ALL	1259	BMN-673	targeted	PARP1	Genome integrity	SN-29	CDC42BPA	CDC42,CDC42BPA,LYN,MEF2C,VAV3	0.87
ALL	1259	BMN-673	targeted	PARP1	Genome integrity	SN-30	FBN2	FBN2,FURIN,LYN,PDGFRB	0.87
ALL	1259	BMN-673	targeted	PARP1	Genome integrity	SN-31	DNMT3B	AHCY,CBS,DNMT3B,NCAPG	0.87
ALL	1259	BMN-673	targeted	PARP1	Genome integrity	SN-32	MYH2	FCGR2A,LYN,MYH2,NCKAP1,NGFRAP1,VAMP2,YWHAE	0.91
ALL	1259	BMN-673	targeted	PARP1	Genome integrity	SN-33	CRTC1,TP53	CRTC1,CTSG,MMP1,SERPINB1,SESN1,TP53,VEGFA	0.91
ALL	1259	BMN-673	targeted	PARP1	Genome integrity	SN-34	PRPF8	LIN28B,MYC,POLR2L,PRPF8,TAF10	0.91
ALL	1259	BMN-673	targeted	PARP1	Genome integrity	SN-35	HMCN1	F2,F3,GNA15,HMCN1,SIRPG,TFPI,VEGFA	0.91
ALL	1259	BMN-673	targeted	PARP1	Genome integrity	SN-36	ABCA7	ABCA7,APOA1,CREBBP,LYN,MEF2C,SNCA,TTR	0.91
ALL	1259	BMN-673	targeted	PARP1	Genome integrity	SN-37	SMC4,TP53	CBS,CDK6,RB1,SESN1,SMC4,TP53,UBC	0.91
ALL	1259	BMN-673	targeted	PARP1	Genome integrity	SN-38	DNAH6	DNAH6,LYN,PAFAH1B1,PLA2G4A,TUBA1C	0.91
ALL	1259	BMN-673	targeted	PARP1	Genome integrity	SN-39	ALKBH7	ALKBH1,ALKBH2,ALKBH7	0.91
ALL	1259	BMN-673	targeted	PARP1	Genome integrity	SN-40	MYCBP2	CBS,LIN28B,MYC,MYCBP2,NPM1,RAE1,UBC	0.91
ALL	1259	BMN-673	targeted	PARP1	Genome integrity	SN-41	CELSR1	CELSR1,LYN,VANGL2,WNT5A,YES1	0.91
ALL	1259	BMN-673	targeted	PARP1	Genome integrity	SN-42	CXADR	AMICA1,CXADR,ITGB1,LYN,RAC1	0.91
ALL	1259	BMN-673	targeted	PARP1	Genome integrity	SN-43	CDK12	CDH2,CDK12,MEF2C,POLR2A	0.91
ALL	1259	BMN-673	targeted	PARP1	Genome integrity	SN-44	LRP1	CTSG,LRP1,LYN,PLAUR,SDC1,SERPINB1,SRC	0.87
ALL	1259	BMN-673	targeted	PARP1	Genome integrity	SN-45	ALKBH7	ALKBH1,ALKBH7,ALKBH8,TRMT112,TUBA1C,UBC,ZWINT	0.91
ALL	1259	BMN-673	targeted	PARP1	Genome integrity	SN-46	BCL11B	BCL11B,CDH2,LYN,NOTCH1,STAT3	0.91
ALL	1259	BMN-673	targeted	PARP1	Genome integrity	SN-47	TRPV3	LYN,PIK3R1,TAC1,TRAT1,TRPM8,TRPV1,TRPV3	0.91
ALL	1259	BMN-673	targeted	PARP1	Genome integrity	SN-48	SIN3B	DDIT3,LIN28B,MAX,SIN3B	0.87
ALL	1259	BMN-673	targeted	PARP1	Genome integrity	SN-49	LHX5	LHX5,LYN,SFRP5,SRC,TNC,TRAT1,WNT7B	0.87
ALL	1259	BMN-673	targeted	PARP1	Genome integrity	SN-50	KALRN	GNA15,KALRN,LYN,RHOC,VAV2	0.87
ALL	1261	rTRAIL	targeted	TR10A (DR4), TR10B (DR5)	apoptosis regulation	SN-01	KALRN	APP,KALRN,S1PR3	0.83
ALL	1261	rTRAIL	targeted	TR10A (DR4), TR10B (DR5)	apoptosis regulation	SN-02	BCL11B	APP,BCL11B,CTBP2,HDAC1,NFKB1,ZFPM1	1
ALL	1261	rTRAIL	targeted	TR10A (DR4), TR10B (DR5)	apoptosis regulation	SN-03	LAMA3	APP,LAMA3,PXN,S1PR3,SRC,SYK,UTRN	0.96
ALL	1261	rTRAIL	targeted	TR10A (DR4), TR10B (DR5)	apoptosis regulation	SN-04	TLN2	ACTN1,APP,ITGB2,NFKB1,PDLIM1,TLN2,VCL	0.96
ALL	1261	rTRAIL	targeted	TR10A (DR4), TR10B (DR5)	apoptosis regulation	SN-05	ARID1A	APP,ARID1A,NFKB1,PPARG,SMARCD3,SYK,VDR	0.91
ALL	1261	rTRAIL	targeted	TR10A (DR4), TR10B (DR5)	apoptosis regulation	SN-06	TRIO	ACTN4,APP,PDLIM1,RHOA,S1PR3,TRIO,XCR1	0.87
ALL	1261	rTRAIL	targeted	TR10A (DR4), TR10B (DR5)	apoptosis regulation	SN-07	PFKFB2	AKT1,CTBP2,GJA3,PFKFB2,S1PR3,TJP1,UBC	0.91
ALL	1261	rTRAIL	targeted	TR10A (DR4), TR10B (DR5)	apoptosis regulation	SN-08	COL14A1	COL14A1,CTSG,MMP1,SERPINB1	0.91
ALL	1261	rTRAIL	targeted	TR10A (DR4), TR10B (DR5)	apoptosis regulation	SN-09	HMCN1	APP,GRB2,HMCN1,SIRPA,SIRPG,SYK,VWF	0.91
ALL	1261	rTRAIL	targeted	TR10A (DR4), TR10B (DR5)	apoptosis regulation	SN-10	DNAH9	DNAH9,DYNLL1,KIF26A,LATS2,SYK,UBC,YWHAE	0.87
ALL	1261	rTRAIL	targeted	TR10A (DR4), TR10B (DR5)	apoptosis regulation	SN-11	FBN2	CTSG,FBN2,FURIN,MFAP4,MFAP5,SERPINB1,THBS1	0.87
ALL	1261	rTRAIL	targeted	TR10A (DR4), TR10B (DR5)	apoptosis regulation	SN-12	PYGM	ACTN1,ALDOA,PDLIM1,PGM1,PYGM,SYK,UBC	0.87
ALL	1261	rTRAIL	targeted	TR10A (DR4), TR10B (DR5)	apoptosis regulation	SN-13	MYH2	APP,CTBP2,FN1,MYH2,SYK,UBC,VAMP2	0.87
ALL	1261	rTRAIL	targeted	TR10A (DR4), TR10B (DR5)	apoptosis regulation	SN-14	MBD6	EXOSC8,IL8,MBD6,PRTN3,SERPINB1	0.87
ALL	1261	rTRAIL	targeted	TR10A (DR4), TR10B (DR5)	apoptosis regulation	SN-15	EGFR	APP,CAV1,EGFR,GJA3,SYK,VEGFA,YES1	0.87
ALL	1261	rTRAIL	targeted	TR10A (DR4), TR10B (DR5)	apoptosis regulation	SN-16	CPSF1	CEBPA,CPSF1,CSTF3,PCBP2,PRTN3,SERPINB1,SYMPK	0.87
ALL	1261	rTRAIL	targeted	TR10A (DR4), TR10B (DR5)	apoptosis regulation	SN-17	USH2A	RAC1,RTKN,S1PR3,SYK,TAX1BP3,USH1C,USH2A	0.87
ALL	1261	rTRAIL	targeted	TR10A (DR4), TR10B (DR5)	apoptosis regulation	SN-18	LHX5	APP,LHX5,MAPK9,RAC1,SFRP5,SYK,WNT5A	0.87
ALL	1261	rTRAIL	targeted	TR10A (DR4), TR10B (DR5)	apoptosis regulation	SN-19	CDC42BPA	CDC42,CDC42BPA,SH3PXD2B,SYK,VAV2	0.87
ALL	1261	rTRAIL	targeted	TR10A (DR4), TR10B (DR5)	apoptosis regulation	SN-20	TRPV3	APP,NFKB1,SRC,TRPM8,TRPV1,TRPV3,USP10	0.87
ALL	1261	rTRAIL	targeted	TR10A (DR4), TR10B (DR5)	apoptosis regulation	SN-21	ABCA7	ABCA7,APOA1,APP,CEBPA,SP1,SYK,TTR	0.87
ALL	1261	rTRAIL	targeted	TR10A (DR4), TR10B (DR5)	apoptosis regulation	SN-22	SRRM2	APP,CAPZA1,MAGOH,SRRM2	0.87
ALL	1261	rTRAIL	targeted	TR10A (DR4), TR10B (DR5)	apoptosis regulation	SN-23	RYR3	APP,FKBP1A,FKBP1B,RYR3,SNCA,SYK,TGFB3	0.87
ALL	1261	rTRAIL	targeted	TR10A (DR4), TR10B (DR5)	apoptosis regulation	SN-24	LTBR	APP,LTBR,MAPK8,SYK,TRAF2,TRAF5,TRAIP	0.87
ALL	1261	rTRAIL	targeted	TR10A (DR4), TR10B (DR5)	apoptosis regulation	SN-25	CPSF1	APP,CPSF1,GTF3C3,RELA,SYK,SYMPK,TBP	0.87
ALL	1261	rTRAIL	targeted	TR10A (DR4), TR10B (DR5)	apoptosis regulation	SN-26	ALKBH7	ALKBH1,ALKBH3,ALKBH7,ALKBH8,CTBP2,TRMT112,UBC	0.87
ALL	1261	rTRAIL	targeted	TR10A (DR4), TR10B (DR5)	apoptosis regulation	SN-27	SHANK2	CTSG,CTTN,PLAUR,SERPINB1,SHANK2,SLC9A3,SYK	0.87
ALL	1261	rTRAIL	targeted	TR10A (DR4), TR10B (DR5)	apoptosis regulation	SN-28	SMC4	APP,PRTN3,RB1,SERPINB1,SMC4,SPI1,UBC	0.87
ALL	1262	UNC1215	targeted	LMBL3	other	SN-01	EGFR	EGFR,FYB,GRAP2,SKAP1	0.87
ALL	1262	UNC1215	targeted	LMBL3	other	SN-02	KALRN	FYB,KALRN,LAT,P2RY10,SKAP1,VAV1,XCR1	0.78
ALL	1262	UNC1215	targeted	LMBL3	other	SN-03	LRP1	CD47,FYB,ITGB3,LRP1,PRKCH,SKAP1,SRC	0.83
ALL	1262	UNC1215	targeted	LMBL3	other	SN-04	DUOX2	DECR1,DUOX2,FYB,LCK,PRKCA,PRKCB,SKAP1	0.83
ALL	1262	UNC1215	targeted	LMBL3	other	SN-05	LAG3	CD247,CD8A,FYB,LAG3,SKAP1,TRAT1,ZAP70	0.78
ALL	1262	UNC1215	targeted	LMBL3	other	SN-06	DUOX2	AGT,DECR1,DUOX2,P2RY10,PRKCH,S1PR3,VCAM1	0.83
ALL	1262	UNC1215	targeted	LMBL3	other	SN-07	LHX5	FYB,LHX5,PTPN11,SFRP5,SKAP1,UBA52,WNT3A	0.78
ALL	1262	UNC1215	targeted	LMBL3	other	SN-08	NID2	ITGB1,NID1,NID2,PRKCH,PTPRC,SKAP1,VCAM1	0.78
ALL	1262	UNC1215	targeted	LMBL3	other	SN-09	TRPV3	FYB,G3BP1,RASA1,SKAP1,TRPM8,TRPV3,USP10	0.83
ALL	1262	UNC1215	targeted	LMBL3	other	SN-10	CELSR1	CD3D,CELSR1,FYB,FZD6,GNG2	0.74
ALL	1262	UNC1215	targeted	LMBL3	other	SN-11	DNAH8	DNAH8,FYB,PLN,PRKACA,SKAP1,VASP,WDTC1	0.74
ALL	1262	UNC1215	targeted	LMBL3	other	SN-12	DNMT3B	CABIN1,DNMT3B,HDAC2,PRKCH	0.78
ALL	1262	UNC1215	targeted	LMBL3	other	SN-13	SNX33	FYB,NCK2,SKAP1,SNX30,SNX33,SNX9,WASL	0.78
ALL	1262	UNC1215	targeted	LMBL3	other	SN-14	ALKBH7	ALKBH1,ALKBH7,ALKBH8,FYB,LAT,TRMT112,UBC	0.78
ALL	1262	UNC1215	targeted	LMBL3	other	SN-15	ABCA7	ABCA7,APOA1,FYB,FYN,SKAP1,SNCA,TGFBI	0.74
ALL	1262	UNC1215	targeted	LMBL3	other	SN-16	TRPV3	LAT,PRKCH,SRC,TRPM8,TRPV1,TRPV3,ZAP70	0.74
ALL	1262	UNC1215	targeted	LMBL3	other	SN-17	HMCN1	FYB,HMCN1,SIRPA,SIRPG,SKAP1,SKAP2,VWF	0.7
ALL	1262	UNC1215	targeted	LMBL3	other	SN-18	CDK12,TP53	CCNK,CDK12,SH2D1A,TP53	0.7
ALL	1262	UNC1215	targeted	LMBL3	other	SN-19	ZNF423	CD247,EBF1,FYB,FZD6,GNAO1,WNT10B,ZNF423	0.7
ALL	1262	UNC1215	targeted	LMBL3	other	SN-20	LTBP1	FN1,FYB,LAT,LTBP1,SKAP2,SYK,TGFB1	0.74
ALL	1262	UNC1215	targeted	LMBL3	other	SN-21	RYR1	FKBP1A,FYB,LCK,RYR1,SKAP2,SNCA,TRPC3	0.78
ALL	1262	UNC1215	targeted	LMBL3	other	SN-22	CXADR	AMICA1,CXADR,FYB,ITGB1,PTPN11,SKAP2,TEK	0.78
ALL	1264	SGC0946	targeted	Q8TEK3 (DOT1L)	chromatin histone methylation	SN-01	SIN3B	LGALS1,MAX,SIN3B,TJP2,TK1	0.74
ALL	1264	SGC0946	targeted	Q8TEK3 (DOT1L)	chromatin histone methylation	SN-02	MUC4	B3GNT2,GALNT6,MUC4,OGN	0.96
ALL	1264	SGC0946	targeted	Q8TEK3 (DOT1L)	chromatin histone methylation	SN-03	SMC4	FAM127B,SMC4,TAL1,UBC	0.87
ALL	1264	SGC0946	targeted	Q8TEK3 (DOT1L)	chromatin histone methylation	SN-04	DNAH8	DNAH8,DYNLT3,NUDT19,PLN,PRKG2,SLC9A3R2	0.87
ALL	1264	SGC0946	targeted	Q8TEK3 (DOT1L)	chromatin histone methylation	SN-05	KALRN	KALRN,PRKAR2A,RAB32,RHOA,XCL1	0.91
ALL	1264	SGC0946	targeted	Q8TEK3 (DOT1L)	chromatin histone methylation	SN-06	BCL11B	BCL11B,FAT1,HDAC1,NR0B2,TAL1	0.91
ALL	1264	SGC0946	targeted	Q8TEK3 (DOT1L)	chromatin histone methylation	SN-07	RAD54L	CDKN2A,LGALS1,MYC,RAD52,RAD54L,TERT,TJP2	0.91
ALL	1264	SGC0946	targeted	Q8TEK3 (DOT1L)	chromatin histone methylation	SN-08	EGFR	EGFR,FAT1,PPARA,STAT5A	0.91
ALL	1264	SGC0946	targeted	Q8TEK3 (DOT1L)	chromatin histone methylation	SN-09	ARID1A	ARID1A,FAT1,MIB2,RELA	0.87
ALL	1264	SGC0946	targeted	Q8TEK3 (DOT1L)	chromatin histone methylation	SN-10	PRPF8	CTPS2,LGALS1,POLR2L,PRPF8,UBC	0.91
ALL	1264	SGC0946	targeted	Q8TEK3 (DOT1L)	chromatin histone methylation	SN-11	CELSR1	CELSR1,FZD6,GNG2,XCL1	0.91
ALL	1264	SGC0946	targeted	Q8TEK3 (DOT1L)	chromatin histone methylation	SN-12	FBN2	FAIM,FBN2,FURIN,NGF,NUDT19,PDGFRB,SLC9A3R2	0.91
ALL	1264	SGC0946	targeted	Q8TEK3 (DOT1L)	chromatin histone methylation	SN-13	PFKFB2	CFTR,LGALS1,NUDT19,PFKFB2,PRKAA1,SLC9A3R2,UBC	0.91
ALL	1264	SGC0946	targeted	Q8TEK3 (DOT1L)	chromatin histone methylation	SN-14	CPSF1	CPSF1,FAT1,FZD6,MED17,PPARA,WDR33,WNT1	0.91
ALL	1264	SGC0946	targeted	Q8TEK3 (DOT1L)	chromatin histone methylation	SN-15	LAMA3	FAT1,LAMA3,PRKAR2A,PXN,RAB32,RELA,SRC	0.91
ALL	1264	SGC0946	targeted	Q8TEK3 (DOT1L)	chromatin histone methylation	SN-16	TRPV3	FZD6,TAL1,TRPM8,TRPV3,UBC,USP10,WNT3A	0.91
ALL	1264	SGC0946	targeted	Q8TEK3 (DOT1L)	chromatin histone methylation	SN-17	NEB	ACTN2,EZR,NEB,NUDT19,SLC9A3R2,SRGN,VIM	0.91
ALL	1264	SGC0946	targeted	Q8TEK3 (DOT1L)	chromatin histone methylation	SN-18	FBN2	FBN2,FZD6,MFAP5,NOTCH1,RUNX1,TAL1,WNT5A	0.91
ALL	1264	SGC0946	targeted	Q8TEK3 (DOT1L)	chromatin histone methylation	SN-19	DNAH9	DNAH9,DYNLL1,PRKACA,PRKAR2A,RAB32,TAL1,UBC	0.91
ALL	1264	SGC0946	targeted	Q8TEK3 (DOT1L)	chromatin histone methylation	SN-20	RAD54L	ABL1,NUDT19,PHLPP2,RAD52,RAD54L,SLC9A3R2,XRCC6	0.91
ALL	1264	SGC0946	targeted	Q8TEK3 (DOT1L)	chromatin histone methylation	SN-21	LHX5	FZD6,LHX5,SFRP5,WNT8B	0.91
ALL	1264	SGC0946	targeted	Q8TEK3 (DOT1L)	chromatin histone methylation	SN-22	ABCA7	ABCA7,ABCG1,APOA1,FAT1,SP1	0.91
ALL	1264	SGC0946	targeted	Q8TEK3 (DOT1L)	chromatin histone methylation	SN-23	TRPV3	NUDT19,PLCB3,SLC9A3R2,TAC1,TRPM8,TRPV1,TRPV3	0.91
ALL	1264	SGC0946	targeted	Q8TEK3 (DOT1L)	chromatin histone methylation	SN-24	LAG3	CD8A,FAT1,JUN,LAG3,LAT	0.96
ALL	1264	SGC0946	targeted	Q8TEK3 (DOT1L)	chromatin histone methylation	SN-25	NID2	ITGA3,JAK2,NID1,NID2,NUDT19,PDGFB,SLC9A3R2	0.96
ALL	1264	SGC0946	targeted	Q8TEK3 (DOT1L)	chromatin histone methylation	SN-26	ABCA7	ABCA7,ADORA2B,APOA1,CALCA,NUDT19,SLC9A3R2,TTR	0.96
ALL	1264	SGC0946	targeted	Q8TEK3 (DOT1L)	chromatin histone methylation	SN-27	CXADR	ACTN4,AMICA1,CXADR,ITGB1,NUDT19,SLC9A3R2,ZYX	0.96
ALL	1264	SGC0946	targeted	Q8TEK3 (DOT1L)	chromatin histone methylation	SN-28	USH2A	NINL,NUDT19,PHLPP1,PRKAR2B,SLC9A3R2,TUBGCP4,USH2A	0.96
ALL	1264	SGC0946	targeted	Q8TEK3 (DOT1L)	chromatin histone methylation	SN-29	MYCBP2	FBXO45,GNAS,MYCBP2,PRKAR2A,RAB32,RAPGEF4,UNC13A	0.96
ALL	1264	SGC0946	targeted	Q8TEK3 (DOT1L)	chromatin histone methylation	SN-30	PYGM	FAT1,FZD6,MYC,PFKM,PYGM,TJP2,WNT5A	0.96
ALL	1264	SGC0946	targeted	Q8TEK3 (DOT1L)	chromatin histone methylation	SN-31	HMCN1	CD47,FAT1,HMCN1,JUN,SIRPG,SKAP2,VEGFA	0.96
ALL	1264	SGC0946	targeted	Q8TEK3 (DOT1L)	chromatin histone methylation	SN-32	SMC4	CDKN2A,FAT1,LGALS1,RB1,SMC4,SP1,UBC	0.96
ALL	1264	SGC0946	targeted	Q8TEK3 (DOT1L)	chromatin histone methylation	SN-33	ESPL1	ESPL1,MAD1L1,NUDT19,SGK1,SLC9A3R2,UBB,ZWINT	0.96
ALL	1264	SGC0946	targeted	Q8TEK3 (DOT1L)	chromatin histone methylation	SN-34	ALKBH7	ALKBH1,ALKBH3,ALKBH7,ALKBH8,LGALS1,TRMT112,UBC	0.96
ALL	1264	SGC0946	targeted	Q8TEK3 (DOT1L)	chromatin histone methylation	SN-35	NID2	HSPG2,ITGB1,MMP15,NID1,NID2,PRKAR2A,RAB32	0.96
ALL	1264	SGC0946	targeted	Q8TEK3 (DOT1L)	chromatin histone methylation	SN-36	RYR3	ATP2A2,FKBP1B,LGALS1,RYR2,RYR3,TAL1,UBC	0.96
ALL	1264	SGC0946	targeted	Q8TEK3 (DOT1L)	chromatin histone methylation	SN-37	TP53	IGFBP2,NUDT19,PTEN,SLC9A3R2,TP53,YY2,ZNF668	0.96
ALL	1264	SGC0946	targeted	Q8TEK3 (DOT1L)	chromatin histone methylation	SN-38	SHANK2	EDN1,NUDT19,PRKAR2A,RAB32,SHANK2,SLC9A3,SLC9A3R2	0.96
ALL	1264	SGC0946	targeted	Q8TEK3 (DOT1L)	chromatin histone methylation	SN-39	KALRN	FZD6,GNB1,KALRN,LPAR2,NUDT19,SLC9A3R2,XCR1	0.96
ALL	1264	SGC0946	targeted	Q8TEK3 (DOT1L)	chromatin histone methylation	SN-40	SRRM2	FAT1,LGALS1,MYC,PRPF6,SRRM2,U2AF2,WT1	0.96
ALL	1264	SGC0946	targeted	Q8TEK3 (DOT1L)	chromatin histone methylation	SN-41	DNAH6,DNAH8	DCTN2,DNAH6,DNAH8,DYNLT3,PRKAR2A,PRKAR2B,RAB32	0.96
ALL	1264	SGC0946	targeted	Q8TEK3 (DOT1L)	chromatin histone methylation	SN-42	MYCBP2	DYNLT3,MYCBP2,NUP62,RAE1,TAL1,TPR,UBC	0.96
ALL	1264	SGC0946	targeted	Q8TEK3 (DOT1L)	chromatin histone methylation	SN-43	DNAH9	DNAH9,DVL2,DYNLL2,DYNLT3,FZD6,MAPK8	0.96
ALL	1264	SGC0946	targeted	Q8TEK3 (DOT1L)	chromatin histone methylation	SN-44	CRTC1	CREB1,CRTC1,FAT1,JUN,NUDT19,PRKG1,SLC9A3R2	0.96
ALL	1264	SGC0946	targeted	Q8TEK3 (DOT1L)	chromatin histone methylation	SN-45	NID2	FAT1,JUN,MMP9,NID1,NID2,TIMP1,TJP2	0.96
ALL	1264	SGC0946	targeted	Q8TEK3 (DOT1L)	chromatin histone methylation	SN-46	ZNF423	EBF1,FAT1,FZD6,NFKB1,SP1,WNT10B,ZNF423	0.96
ALL	127	GSK269962A	targeted	ROCK1, ROCK2	cytoskeleton	SN-01	NID2	ITGA2,ITGB1,NID1,NID2,VEGFC	0.9
ALL	127	GSK269962A	targeted	ROCK1, ROCK2	cytoskeleton	SN-02	EGFR	DUSP6,EGFR,MAPK14,UBASH3B	0.86
ALL	127	GSK269962A	targeted	ROCK1, ROCK2	cytoskeleton	SN-03	MYH2	DUSP6,ITGA4,MAPK8,MYH2,RHOA	0.9
ALL	127	GSK269962A	targeted	ROCK1, ROCK2	cytoskeleton	SN-04	LTBP1	DUSP6,LTBP1,MAPK3,TGFB1,VEGFC	0.9
ALL	127	GSK269962A	targeted	ROCK1, ROCK2	cytoskeleton	SN-05	OBSCN	ACTN1,CDC42,DUSP6,MAPK14,OBSCN,TTN,VEGFC	0.95
ALL	127	GSK269962A	targeted	ROCK1, ROCK2	cytoskeleton	SN-06	TP53	DUSP6,ETHE1,MAPK7,TP53	0.95
ALL	127	GSK269962A	targeted	ROCK1, ROCK2	cytoskeleton	SN-07	USH2A	DUSP6,HSPB1,MAPK14,NINL,TUBA4A,USH2A,YWHAE	0.9
ALL	127	GSK269962A	targeted	ROCK1, ROCK2	cytoskeleton	SN-08	CRTC1	CRTC1,DUSP6,MAPK8,MMP1,TRIP6,VEGFA,VEGFC	0.95
ALL	127	GSK269962A	targeted	ROCK1, ROCK2	cytoskeleton	SN-09	CXADR	AMICA1,CXADR,DUSP6,ITGA2,ITGB1,MAPK14,YWHAZ	0.9
ALL	127	GSK269962A	targeted	ROCK1, ROCK2	cytoskeleton	SN-10	SHANK2	CTTN,DUSP6,ITGB1,MAPK1,SHANK2,VEGFC,WASF2	0.95
ALL	127	GSK269962A	targeted	ROCK1, ROCK2	cytoskeleton	SN-11	DUOX2	DECR1,DUOX2,DUSP6,MAPK14,PRKCB,PRKCH,VCAM1	0.95
ALL	127	GSK269962A	targeted	ROCK1, ROCK2	cytoskeleton	SN-12	PCNT	DUSP6,MAPK1,MYO18B,MYO6,OPTN,PCNT,YWHAG	0.95
ALL	127	GSK269962A	targeted	ROCK1, ROCK2	cytoskeleton	SN-13	DNMT3B	DNMT3B,DUSP6,MAPK3,MBD2,UBASH3B,UBC,UHRF2	0.95
ALL	127	GSK269962A	targeted	ROCK1, ROCK2	cytoskeleton	SN-14	ABCA7	ABCA7,ABCG1,APOA1,CEBPB,DUSP6,MAPK14,TTR	0.95
ALL	127	GSK269962A	targeted	ROCK1, ROCK2	cytoskeleton	SN-15	MBD6	ARRB1,DUSP6,EXOSC8,IL8,MAPK8,MBD6,TNPO1	0.95
ALL	127	GSK269962A	targeted	ROCK1, ROCK2	cytoskeleton	SN-16	LRP1	ALB,CTSG,LRP1,SERPINB1,THBS1,VEGFC	0.95
ALL	127	GSK269962A	targeted	ROCK1, ROCK2	cytoskeleton	SN-17	SRRM2	DUSP6,EIF4E,MAD1L1,MAPK11,SRRM1,SRRM2,TPR	0.95
ALL	127	GSK269962A	targeted	ROCK1, ROCK2	cytoskeleton	SN-18	FBN2	CBL,FBN1,FBN2,ITGB1,ITGB3,UBASH3B,VEGFC	0.95
ALL	127	GSK269962A	targeted	ROCK1, ROCK2	cytoskeleton	SN-19	TRPV3	DUSP6,MAPK14,SRC,TRIP6,TRPM8,TRPV1,TRPV3	0.95
ALL	127	GSK269962A	targeted	ROCK1, ROCK2	cytoskeleton	SN-20	CELSR1	ADAR,CELSR1,DUSP6,IFITM3,MAPK8,VANGL2,WNT5A	0.9
ALL	127	GSK269962A	targeted	ROCK1, ROCK2	cytoskeleton	SN-21	SNX33	ARRB1,DNM2,DUSP6,MAPK1,SNX33,SNX9,VAV1	0.9
ALL	127	GSK269962A	targeted	ROCK1, ROCK2	cytoskeleton	SN-22	LHX5	DUSP6,FZD6,GNB1,LHX5,MAPK14,SFRP5,WNT8A	0.9
ALL	127	GSK269962A	targeted	ROCK1, ROCK2	cytoskeleton	SN-23	MYCBP2	DUSP6,EIF4E,MAPK14,MYCBP2,RAE1,RPS29,UPF3B	0.9
ALL	127	GSK269962A	targeted	ROCK1, ROCK2	cytoskeleton	SN-24	LAG3	BCL2,CD8A,DUSP6,GAB2,LAG3,MAPK8,ZAP70	0.9
ALL	127	GSK269962A	targeted	ROCK1, ROCK2	cytoskeleton	SN-25	SIN3B	DUSP6,MAPK13,MAX,ODC1,SIN3B	0.86
ALL	127	GSK269962A	targeted	ROCK1, ROCK2	cytoskeleton	SN-26	ALKBH7	ALKBH1,ALKBH7,ALKBH8,TRMT11,TRMT112,UBASH3B,UBC	0.9
ALL	127	GSK269962A	targeted	ROCK1, ROCK2	cytoskeleton	SN-27	BCL11B	ARRB1,BCL11B,DUSP6,HDAC1,MAPK3,NOTCH1,NRIP1	0.86
ALL	127	GSK269962A	targeted	ROCK1, ROCK2	cytoskeleton	SN-28	HMCN1	CBL,ERBB4,FAM127B,HMCN1,SIRPG,UBASH3B,UBC	0.86
ALL	127	GSK269962A	targeted	ROCK1, ROCK2	cytoskeleton	SN-29	PFKFB2	DUSP6,FAM127B,MAPK14,PFKFB2,PRKAA2,TSC2,UBC	0.86
ALL	134	Etoposide	cytotoxic	TOP2	DNA replication	SN-01	KALRN	CTHRC1,FZD6,GNB1,KALRN,LPAR6	0.9
ALL	134	Etoposide	cytotoxic	TOP2	DNA replication	SN-02	TRIO	BIN2,CTHRC1,DVL2,RHOA,RHOU,TRIO	0.95
ALL	134	Etoposide	cytotoxic	TOP2	DNA replication	SN-03	LRP1	CTSG,LRP1,PLAUR	0.9
ALL	134	Etoposide	cytotoxic	TOP2	DNA replication	SN-04	TP53	CTHRC1,DVL1,RPS27A,TP53,YOD1	0.95
ALL	134	Etoposide	cytotoxic	TOP2	DNA replication	SN-05	LRP1	CTHRC1,CTSG,FZD6,GPC3,LRP1,THBS1,WNT5A	0.9
ALL	134	Etoposide	cytotoxic	TOP2	DNA replication	SN-06	TRIO	CTSG,F2RL1,LPAR6,TRIO	0.95
ALL	134	Etoposide	cytotoxic	TOP2	DNA replication	SN-07	OBSCN	BIN2,CTHRC1,DVL3,OBSCN,RAC1,TTN,WDR1	0.9
ALL	134	Etoposide	cytotoxic	TOP2	DNA replication	SN-08	TP53	CTSG,IGFBP3,NDN,TP53	0.9
ALL	134	Etoposide	cytotoxic	TOP2	DNA replication	SN-09	TLN2	CTHRC1,CTSG,DVL1,ITGB2,PLAUR,RHOA,TLN2	0.9
ALL	134	Etoposide	cytotoxic	TOP2	DNA replication	SN-10	COL14A1	COL14A1,CTSG,MMP1,TIMP2	0.95
ALL	134	Etoposide	cytotoxic	TOP2	DNA replication	SN-11	CDK12	BIN2,CDK12,CTHRC1,DVL1,HNRNPK,POLR2A,UBC	0.95
ALL	134	Etoposide	cytotoxic	TOP2	DNA replication	SN-12	DUOX2	CTHRC1,DECR1,DHFR,DUOX2,DVL2,GGH,RAC1	0.95
ALL	134	Etoposide	cytotoxic	TOP2	DNA replication	SN-13	MUC4	CTHRC1,CTSG,DVL3,ERBB2,IGF1,MUC4,UBA52	0.95
ALL	134	Etoposide	cytotoxic	TOP2	DNA replication	SN-14	TLN2	BIN2,TAL1,TLN2,UBC,VCL,WDR1,YOD1	0.95
ALL	134	Etoposide	cytotoxic	TOP2	DNA replication	SN-15	PFKFB2	AKT1,CTHRC1,FZD6,PFKFB2,TCEAL4,UBC,WNT3A	0.95
ALL	134	Etoposide	cytotoxic	TOP2	DNA replication	SN-16	DNAH6	AP2A1,BIN2,CTHRC1,DNAH3,DNAH6,FZD5,NTRK1	0.95
ALL	134	Etoposide	cytotoxic	TOP2	DNA replication	SN-17	SNX33	AGT,BIN2,CTSG,DNM1,SNX33,SNX9	0.95
ALL	134	Etoposide	cytotoxic	TOP2	DNA replication	SN-18	SIN3B,TP53	CTHRC1,FZD6,NCOR2,NDN,SIN3B,TP53,WNT10B	0.95
ALL	134	Etoposide	cytotoxic	TOP2	DNA replication	SN-19	SHANK2	CTHRC1,CTSG,DNM2,DVL2,F2R,SHANK2,SRC	0.95
ALL	134	Etoposide	cytotoxic	TOP2	DNA replication	SN-20	USH2A	CNTN2,CTHRC1,DVL3,UBC,USH1C,USH2A,YOD1	0.95
ALL	134	Etoposide	cytotoxic	TOP2	DNA replication	SN-21	ABCA7	ABCA7,ABCG1,APOA1,CTHRC1,FZD6,GNG2,SAA1	0.95
ALL	134	Etoposide	cytotoxic	TOP2	DNA replication	SN-22	NEB	ACTN2,CTSG,IGF2,NEB	0.95
ALL	134	Etoposide	cytotoxic	TOP2	DNA replication	SN-23	USH2A	CTHRC1,DVL2,GNAQ,NINL,PLK1,PRKACA,USH2A	0.95
ALL	134	Etoposide	cytotoxic	TOP2	DNA replication	SN-24	FBN2	AP2A1,BIN2,CTSG,F2,FBN2,FURIN,THBS1	0.9
ALL	134	Etoposide	cytotoxic	TOP2	DNA replication	SN-25	MBD6	CANT1,CTHRC1,EXOSC8,FZD6,MBD6,PDE6A,PNPT1	0.95
ALL	134	Etoposide	cytotoxic	TOP2	DNA replication	SN-26	DNAH9	CTHRC1,DNAH9,DYNLL2,MAPK8,OSBPL1A,ROR2	0.95
ALL	134	Etoposide	cytotoxic	TOP2	DNA replication	SN-27	MYCBP2	CTHRC1,FBXO45,FZD4,FZD6,MYCBP2,SKP1,UBA52	0.95
ALL	134	Etoposide	cytotoxic	TOP2	DNA replication	SN-28	CXADR	AMICA1,CTHRC1,CXADR,FZD6,GNAO1,ITGA4,PXN	0.95
ALL	134	Etoposide	cytotoxic	TOP2	DNA replication	SN-29	FBN2	CTHRC1,DVL1,FBN2,FURIN,PROC,TIMP2,TMED2	0.95
ALL	134	Etoposide	cytotoxic	TOP2	DNA replication	SN-30	HMCN1	CGA,CTHRC1,FZD6,GNAT2,HMCN1,POMC,SIRPG	0.95
ALL	134	Etoposide	cytotoxic	TOP2	DNA replication	SN-31	RYR1,RYR3	ASPH,CTHRC1,DVL3,FKBP1B,JUN,RYR1,RYR3	0.95
ALL	134	Etoposide	cytotoxic	TOP2	DNA replication	SN-32	ALKBH7	ALKBH1,ALKBH7,ALKBH8,CTHRC1,DVL2,TRMT112,UBC	0.95
ALL	134	Etoposide	cytotoxic	TOP2	DNA replication	SN-33	ZNF423	CTHRC1,EBF1,EGR1,FZD6,TGFB1,WNT1,ZNF423	0.9
ALL	1373	Dabrafenib	targeted	BRAF	ERK MAPK signaling	SN-01	SIN3B	NEDD4L,SIN3B,SMAD3,TSC22D3,VPS37B	0.73
ALL	1373	Dabrafenib	targeted	BRAF	ERK MAPK signaling	SN-02	HERC1	HERC1,MYLIP,UBC,VPS37B	0.82
ALL	1373	Dabrafenib	targeted	BRAF	ERK MAPK signaling	SN-03	ERCC6	ERCC6,MAPK8,MYC,PRKCB,SH3BP5,UBTF	0.86
ALL	1373	Dabrafenib	targeted	BRAF	ERK MAPK signaling	SN-04	RYR1	ASPH,JUN,MAP3K5,RYR1,TSC22D3	0.86
ALL	1373	Dabrafenib	targeted	BRAF	ERK MAPK signaling	SN-05	KALRN	GNG2,GRAP2,KALRN,PRKCH,PRKCQ,VAV3	0.86
ALL	1373	Dabrafenib	targeted	BRAF	ERK MAPK signaling	SN-06	NID2	B2M,GBP1,GRAP2,HSPG2,NID2	0.82
ALL	1373	Dabrafenib	targeted	BRAF	ERK MAPK signaling	SN-07	ERCC6	ERCC6,FOS,HDAC2,TSC22D3,UBC,VPS37B,XPC	0.73
ALL	1373	Dabrafenib	targeted	BRAF	ERK MAPK signaling	SN-08	ARID1A	ARID1A,PRKCB,RELA,STAT4	0.77
ALL	1373	Dabrafenib	targeted	BRAF	ERK MAPK signaling	SN-09	LTBR	LTB,LTBR,TNFSF14	0.82
ALL	1373	Dabrafenib	targeted	BRAF	ERK MAPK signaling	SN-10	LRP1	LRP1,PLCG1,PRKCB,PRKCH,SHC1,SRC	0.86
ALL	1373	Dabrafenib	targeted	BRAF	ERK MAPK signaling	SN-11	MBD6	EXOSC8,MBD6,TSC22D3,UBA52,UPF1,VPS37B,XRN1	0.77
ALL	1373	Dabrafenib	targeted	BRAF	ERK MAPK signaling	SN-12	DUOX2	DECR1,DUOX2,GUCY1B3,NOS3,PRKCB,PRKCH,VCAM1	0.77
[truncated: 28,665 more rows]
