# Supplementary material for: HIT'nDRIVE: patient-specific multidriver gene prioritization for precision oncology
Source: HighWire-hosted journal article supplement (doi:10.1101/gr.221218.117), 2017-07-18
Supplement: Supplemental_Table_S20.xlsx [file Supplemental_Table_S20.xlsx]

## Sheet: Supplemental_Table_S20
Supplemental Table S20. Correlation of the number of driver genes predicted by HIT’nDRIVE with mutation rate and copy-number burden.
Cancer.Type	TCGA.Sample.ID	Mutation.Rate	Copy.Number.Burden	Number.of.Driver.Genes
GBM	TCGA-02-0001-01	NA	19	3
GBM	TCGA-02-0003-01	0.0209364	13.9	8
GBM	TCGA-02-0007-01	NA	18.1	4
GBM	TCGA-02-0009-01	NA	15	5
GBM	TCGA-02-0010-01	NA	15.5	3
GBM	TCGA-02-0011-01	NA	25.8	3
GBM	TCGA-02-0014-01	NA	19.4	7
GBM	TCGA-02-0015-01	NA	14.6	9
GBM	TCGA-02-0016-01	NA	20.4	3
GBM	TCGA-02-0021-01	NA	17.3	5
GBM	TCGA-02-0024-01	NA	16	5
GBM	TCGA-02-0025-01	NA	9.62	3
GBM	TCGA-02-0026-01	NA	15.6	2
GBM	TCGA-02-0028-01	NA	19.5	2
GBM	TCGA-02-0033-01	0.0145807	5.12	4
GBM	TCGA-02-0038-01	NA	16.8	5
GBM	TCGA-02-0043-01	NA	16.5	5
GBM	TCGA-02-0046-01	NA	9.69	6
GBM	TCGA-02-0047-01	0.0334608	2.56	6
GBM	TCGA-02-0048-01	NA	9.37	9
GBM	TCGA-02-0052-01	NA	12.3	4
GBM	TCGA-02-0054-01	NA	18.5	3
GBM	TCGA-02-0055-01	0.0235534	13.7	3
GBM	TCGA-02-0057-01	NA	7.37	1
GBM	TCGA-02-0058-01	NA	12.4	2
GBM	TCGA-02-0060-01	NA	8	3
GBM	TCGA-02-0068-01	NA	10.9	5
GBM	TCGA-02-0069-01	NA	42.8	5
GBM	TCGA-02-0070-01	NA	15.8	2
GBM	TCGA-02-0075-01	NA	27.9	3
GBM	TCGA-02-0079-01	NA	24.8	5
GBM	TCGA-02-0083-01	NA	13	5
GBM	TCGA-02-0084-01	NA	10.8	4
GBM	TCGA-02-0085-01	NA	11.1	5
GBM	TCGA-02-0089-01	NA	14.6	5
GBM	TCGA-02-0099-01	NA	24.3	4
GBM	TCGA-02-0104-01	NA	20.1	4
GBM	TCGA-02-0107-01	NA	0.0526	1
GBM	TCGA-02-0114-01	NA	14.9	4
GBM	TCGA-02-0115-01	NA	20.5	3
GBM	TCGA-02-0116-01	NA	17.9	4
GBM	TCGA-02-2470-01	0.0261705	10.8	2
GBM	TCGA-02-2483-01	0.0211233	18	3
GBM	TCGA-02-2485-01	0.0233665	17.6	5
GBM	TCGA-06-0128-01	0.0244881	13.9	8
GBM	TCGA-06-0129-01	0.0173847	8.55	6
GBM	TCGA-06-0130-01	0.0125245	6.36	2
GBM	TCGA-06-0132-01	0.00785115	4.21	1
GBM	TCGA-06-0137-01	0.0203756	14.2	8
GBM	TCGA-06-0138-01	NA	12.6	7
GBM	TCGA-06-0139-01	0.00224319	0.00155	2
GBM	TCGA-06-0140-01	0.0188801	15.5	1
GBM	TCGA-06-0141-01	0.0046733	0.00888	3
GBM	TCGA-06-0142-01	0.00317785	0.126	6
GBM	TCGA-06-0143-01	NA	12.1	7
GBM	TCGA-06-0145-01	0.038508	14.1	5
GBM	TCGA-06-0147-01	NA	0.0572	3
GBM	TCGA-06-0148-01	NA	14.6	3
GBM	TCGA-06-0151-01	0.00897274	41	1
GBM	TCGA-06-0152-01	0.0321523	22	8
GBM	TCGA-06-0154-01	0.0241142	13.8	8
GBM	TCGA-06-0155-01	0.0342086	12	3
GBM	TCGA-06-0157-01	0.0228057	14.1	6
GBM	TCGA-06-0158-01	0.0218711	15.2	7
GBM	TCGA-06-0167-01	0.000560796	NA	1
GBM	TCGA-06-0169-01	0.0201887	12.5	4
GBM	TCGA-06-0171-01	0.0196279	23.2	5
GBM	TCGA-06-0173-01	0.0362648	15.4	7
GBM	TCGA-06-0174-01	0.0323393	12.4	10
GBM	TCGA-06-0178-01	0.000560796	0.0275	1
GBM	TCGA-06-0184-01	0.0231796	27.1	8
GBM	TCGA-06-0185-01	0.024675	21.1	6
GBM	TCGA-06-0187-01	0.0269182	16.8	6
GBM	TCGA-06-0188-01	0.0179455	39.1	6
GBM	TCGA-06-0189-01	0.00448637	0.0713	4
GBM	TCGA-06-0190-01	0.0190671	13.8	2
GBM	TCGA-06-0192-01	0.0319654	14.4	3
GBM	TCGA-06-0195-01	0.0351432	45.9	9
GBM	TCGA-06-0197-01	NA	17.9	3
GBM	TCGA-06-0201-01	NA	14.3	1
GBM	TCGA-06-0206-01	NA	21.1	3
GBM	TCGA-06-0208-01	NA	13	7
GBM	TCGA-06-0210-01	0.0233665	14.5	6
GBM	TCGA-06-0213-01	0.0314046	15.4	6
GBM	TCGA-06-0214-01	0.0284137	20.7	3
GBM	TCGA-06-0216-01	0.0306569	54.3	2
GBM	TCGA-06-0219-01	0.0188801	16.3	4
GBM	TCGA-06-0237-01	0.0155154	23.3	7
GBM	TCGA-06-0238-01	0.0183193	11.4	5
GBM	TCGA-06-0241-01	0.0297222	15.7	6
GBM	TCGA-06-0644-01	0.0243012	13.7	7
GBM	TCGA-06-0645-01	0.0252358	19.1	6
GBM	TCGA-06-0646-01	0.01645	15.5	6
GBM	TCGA-06-0648-01	0.0259836	16.9	5
GBM	TCGA-06-0649-01	0.0626223	27.3	3
GBM	TCGA-06-0650-01	0.0115898	0.0969	1
GBM	TCGA-06-0743-01	0.0459853	17.3	4
GBM	TCGA-06-0744-01	0.0340216	17.4	1
GBM	TCGA-06-0745-01	0.0272921	20.4	3
GBM	TCGA-06-0747-01	0.0429944	15.6	2
GBM	TCGA-06-0876-01	0.035704	12	4
GBM	TCGA-06-0877-01	0.0353302	25.9	1
GBM	TCGA-06-0878-01	0.0209364	20.2	3
GBM	TCGA-06-0879-01	0.0271052	20.4	2
GBM	TCGA-06-0881-01	0.00317785	0.102	2
GBM	TCGA-06-0882-01	0.0143938	15.2	1
GBM	TCGA-06-0939-01	0.027479	12.7	3
GBM	TCGA-06-1804-01	0.0426205	15.9	4
GBM	TCGA-06-2557-01	0.022058	24.8	2
GBM	TCGA-06-2561-01	0.0181324	24.5	3
GBM	TCGA-06-2562-01	0.0287875	18.5	2
GBM	TCGA-06-2563-01	0.0379472	16	2
GBM	TCGA-06-2564-01	0.0237404	10.5	1
GBM	TCGA-06-2565-01	0.0213103	12.1	3
GBM	TCGA-06-2567-01	0.0271052	15.6	3
GBM	TCGA-06-2569-01	0.0171978	48.3	2
GBM	TCGA-06-2570-01	0.0155154	7.14	5
GBM	TCGA-06-5408-01	0.016637	22.3	2
GBM	TCGA-06-5410-01	0.00542103	0.00283	2
GBM	TCGA-06-5411-01	0.016637	13.4	3
GBM	TCGA-06-5413-01	0.0241142	16.6	2
GBM	TCGA-06-5414-01	0.0132722	14.5	1
GBM	TCGA-06-5415-01	0.0147676	23.1	2
GBM	TCGA-06-5417-01	0.0312177	NA	3
GBM	TCGA-06-5418-01	0.0151415	15.4	3
GBM	TCGA-06-5856-01	0.0261705	58.1	2
GBM	TCGA-06-5859-01	0.0198148	35.9	1
GBM	TCGA-06-6388-01	0.0188801	15.5	2
GBM	TCGA-06-6389-01	0.0183193	14.9	2
GBM	TCGA-06-6390-01	0.0211233	21.9	3
GBM	TCGA-06-6391-01	0.0308438	8.72	1
GBM	TCGA-06-6694-01	0.0379472	14.4	4
GBM	TCGA-06-6695-01	0.0190671	15.9	3
GBM	TCGA-06-6698-01	0.0171978	12.5	3
GBM	TCGA-06-6701-01	0.0177586	4.68	2
GBM	TCGA-08-0245-01	NA	61.2	3
GBM	TCGA-08-0246-01	NA	26.6	6
GBM	TCGA-08-0344-01	NA	5.76	1
GBM	TCGA-08-0347-01	NA	14.8	5
GBM	TCGA-08-0351-01	NA	8.26	2
GBM	TCGA-08-0353-01	NA	13.5	8
GBM	TCGA-08-0354-01	NA	15.9	6
GBM	TCGA-08-0356-01	NA	14.7	2
GBM	TCGA-08-0357-01	NA	13.3	4
GBM	TCGA-08-0358-01	NA	15	7
GBM	TCGA-08-0360-01	NA	7.52	3
GBM	TCGA-08-0373-01	NA	17	5
GBM	TCGA-08-0375-01	NA	18.6	4
GBM	TCGA-08-0386-01	0.0052341	33.6	3
GBM	TCGA-08-0389-01	NA	14.2	2
GBM	TCGA-08-0390-01	NA	16.2	4
GBM	TCGA-12-0615-01	0.0315915	27.3	2
GBM	TCGA-12-0616-01	0.0185063	10.5	7
GBM	TCGA-12-0618-01	0.0130852	15.8	8
GBM	TCGA-12-0619-01	0.024862	34.2	5
GBM	TCGA-12-0688-01	0.0241142	13.8	2
GBM	TCGA-12-0821-01	0.0379472	21.1	3
GBM	TCGA-12-1597-01	0.024862	20.9	3
GBM	TCGA-12-3649-01	0.038508	16.4	3
GBM	TCGA-12-3652-01	0.0286006	16.2	1
GBM	TCGA-12-3653-01	0.0117767	61.1	2
GBM	TCGA-12-5295-01	0.0411251	23.1	4
GBM	TCGA-12-5299-01	0.0114029	15.1	1
GBM	TCGA-12-5301-01	0.0267313	13.8	3
GBM	TCGA-14-0740-01	0.0209364	28.1	3
GBM	TCGA-14-0781-01	0.0108421	0.118	2
GBM	TCGA-14-0786-01	0.019254	13.3	1
GBM	TCGA-14-0787-01	0.0185063	18.9	1
GBM	TCGA-14-0789-01	0.0336478	11.8	4
GBM	TCGA-14-0790-01	0.0254228	16.1	5
GBM	TCGA-14-0813-01	0.0476677	20.9	5
GBM	TCGA-14-0862-01	0.0209364	27.4	2
GBM	TCGA-14-0871-01	0.0312177	45.5	4
GBM	TCGA-14-1043-01	0.0119637	11.2	1
GBM	TCGA-14-1395-01	0.0185063	16.4	4
GBM	TCGA-14-1450-01	0.0293483	17.7	1
GBM	TCGA-14-1456-01	0.00953354	6.3	4
GBM	TCGA-14-1823-01	0.0257966	40.7	2
GBM	TCGA-14-1825-01	0.0237404	23.3	1
GBM	TCGA-14-1829-01	0.024675	18.7	2
GBM	TCGA-15-0742-01	0.0263574	22.5	5
GBM	TCGA-15-1444-01	0.00934661	6.39	3
GBM	TCGA-16-0846-01	0.0362648	9.86	3
GBM	TCGA-16-0861-01	0.0355171	18.1	3
GBM	TCGA-16-1045-01	0.033087	20.2	4
GBM	TCGA-16-1048-01	0.0278529	NA	2
GBM	TCGA-19-1390-01	0.0588836	27.4	3
GBM	TCGA-19-1790-01	0.0454245	13.6	6
GBM	TCGA-19-2619-01	0.0286006	16.6	1
GBM	TCGA-19-2620-01	0.0257966	13.4	4
GBM	TCGA-19-2623-01	0.0355171	22.3	3
GBM	TCGA-19-2624-01	0.0186932	10.1	1
GBM	TCGA-19-2625-01	0.0229926	21.7	6
GBM	TCGA-19-2629-01	0.0342086	50.6	4
GBM	TCGA-19-4068-01	0.0186932	15.3	1
GBM	TCGA-19-5953-01	0.0177586	13.9	4
GBM	TCGA-26-1439-01	0.0145807	36	1
GBM	TCGA-26-1442-01	0.0160762	2.62	2
GBM	TCGA-26-5132-01	0.0224319	16.1	3
GBM	TCGA-26-5134-01	0.0304699	7.48	1
GBM	TCGA-26-5136-01	0.0244881	24.5	2
GBM	TCGA-26-5139-01	0.0239273	12	4
GBM	TCGA-26-6173-01	0.013833	25.7	1
GBM	TCGA-26-6174-01	0.0444898	10.7	2
GBM	TCGA-27-1830-01	0.0134591	20.7	2
GBM	TCGA-27-1831-01	0.0218711	9.14	4
GBM	TCGA-27-1832-01	0.0145807	18.4	1
GBM	TCGA-27-1834-01	0.0269182	29.6	2
GBM	TCGA-27-1835-01	0.0345824	18.1	2
GBM	TCGA-27-1836-01	0.019254	6.64	1
GBM	TCGA-27-1837-01	0.0190671	9.56	1
GBM	TCGA-27-1838-01	0.04692	18.6	5
GBM	TCGA-27-2518-01	0.0190671	11.9	1
GBM	TCGA-27-2519-01	0.016637	22.5	2
GBM	TCGA-27-2521-01	0.0259836	14.1	2
GBM	TCGA-27-2523-01	0.0237404	12.1	1
GBM	TCGA-27-2524-01	0.0201887	28.1	3
GBM	TCGA-27-2526-01	0.0200017	16.9	3
GBM	TCGA-27-2528-01	0.0239273	10.6	2
GBM	TCGA-28-1747-01	0.0211233	10.1	2
GBM	TCGA-28-2501-01	0.0143938	NA	4
GBM	TCGA-28-2502-01	0.0190671	14.5	4
GBM	TCGA-28-2509-01	0.0254228	27.6	1
GBM	TCGA-28-2510-01	0.00972047	NA	3
GBM	TCGA-28-2513-01	0.0272921	7.53	4
GBM	TCGA-28-5208-01	0.024675	11	2
GBM	TCGA-28-5209-01	0.0351432	20.8	2
GBM	TCGA-28-5211-01	0.113094	12.3	2
GBM	TCGA-28-5213-01	0.0233665	21.8	3
GBM	TCGA-28-5215-01	0.0168239	28.5	1
GBM	TCGA-28-5216-01	0.0233665	28.8	3
GBM	TCGA-28-5218-01	0.0100943	13.9	2
GBM	TCGA-28-5219-01	0.0200017	27.3	2
GBM	TCGA-28-5220-01	0.0158892	24.5	1
GBM	TCGA-28-6450-01	0.0265444	15.5	4
GBM	TCGA-32-1970-01	0.0293483	16.3	4
GBM	TCGA-32-1977-01	0.0284137	15.2	3
GBM	TCGA-32-1979-01	0.0306569	11.8	2
GBM	TCGA-32-1980-01	0.00355171	0.00342	2
GBM	TCGA-32-1982-01	0.030283	12.4	3
GBM	TCGA-32-1986-01	0.0198148	10.9	4
GBM	TCGA-32-1991-01	0.0231796	10.9	3
GBM	TCGA-32-2494-01	0.0272921	15.8	3
GBM	TCGA-32-2495-01	0.0332739	26	3
GBM	TCGA-32-2632-01	0.043929	19.2	5
GBM	TCGA-32-2638-01	0.0299091	14.3	1
GBM	TCGA-32-4208-01	0.0170108	14.1	2
GBM	TCGA-32-4209-01	0.0100943	22	1
GBM	TCGA-32-4210-01	0.0362648	55.6	3
GBM	TCGA-32-4211-01	0.0201887	15.3	2
GBM	TCGA-32-4213-01	0.0229926	11.2	4
GBM	TCGA-32-4719-01	0.0200017	6.2	1
GBM	TCGA-32-5222-01	0.0317785	28.7	1
GBM	TCGA-41-2571-01	0.0216841	18.2	2
GBM	TCGA-41-2572-01	0.0173847	21.4	2
GBM	TCGA-41-2573-01	0.0194409	34.4	1
GBM	TCGA-41-2575-01	0.0325262	24.2	2
OV	TCGA-04-1332-01	0.0293483	24.2	2
OV	TCGA-04-1336-01	0.0416859	58.2	5
OV	TCGA-04-1337-01	NA	33.3	1
OV	TCGA-04-1338-01	NA	52.6	6
OV	TCGA-04-1341-01	0.024675	46.2	8
OV	TCGA-04-1342-01	0.167304	43.5	6
OV	TCGA-04-1343-01	0.0489762	55.2	8
OV	TCGA-04-1346-01	0.0233665	52.2	5
OV	TCGA-04-1347-01	0.0760814	64.4	14
OV	TCGA-04-1348-01	0.0201887	27.5	6
OV	TCGA-04-1349-01	0.0244881	67.6	13
OV	TCGA-04-1350-01	NA	59.7	3
OV	TCGA-04-1353-01	0.0214972	36.3	1
OV	TCGA-04-1356-01	0.0609399	70.3	5
OV	TCGA-04-1357-01	0.0459853	41.8	2
OV	TCGA-04-1361-01	0.0489762	43.7	8
OV	TCGA-04-1362-01	0.0392557	65.6	15
OV	TCGA-04-1364-01	NA	56.8	4
OV	TCGA-04-1365-01	NA	46.9	3
OV	TCGA-04-1367-01	0.0785115	78.4	6
OV	TCGA-04-1369-01	0.0515933	44.6	1
OV	TCGA-04-1514-01	NA	46.9	14
OV	TCGA-04-1516-01	0.0364518	54.5	1
OV	TCGA-04-1517-01	NA	64.3	1
OV	TCGA-04-1519-01	NA	89.5	1
OV	TCGA-04-1525-01	NA	50.3	7
OV	TCGA-04-1530-01	NA	23.3	1
OV	TCGA-04-1536-01	NA	50.1	9
OV	TCGA-04-1542-01	0.0381342	70.3	8
OV	TCGA-04-1638-01	0.0293483	73.1	4
OV	TCGA-04-1644-01	0.024675	49.9	1
OV	TCGA-04-1646-01	0.0237404	78.7	3
OV	TCGA-04-1648-01	0.0538364	76.3	3
OV	TCGA-04-1649-01	0.049537	64.1	5
OV	TCGA-04-1651-01	0.0489762	80.2	3
OV	TCGA-04-1652-01	0.0420597	47.2	10
OV	TCGA-04-1654-01	NA	37	6
OV	TCGA-04-1655-01	0.0368256	62.7	4
OV	TCGA-09-0366-01	0.0435552	41.9	1
OV	TCGA-09-0369-01	0.0626223	46.9	2
OV	TCGA-09-1659-01	NA	32.2	3
OV	TCGA-09-1661-01	NA	56.9	6
OV	TCGA-09-1662-01	NA	33.5	2
OV	TCGA-09-1664-01	0.0272921	8.76	2
OV	TCGA-09-1665-01	NA	54.4	6
OV	TCGA-09-1666-01	NA	81.8	1
OV	TCGA-09-1667-01	NA	39	20
OV	TCGA-09-1668-01	NA	64.5	8
OV	TCGA-09-1669-01	NA	36.6	6
OV	TCGA-09-1670-01	0.022058	76.4	4
OV	TCGA-09-1672-01	0.00729035	58.6	1
OV	TCGA-09-1673-01	0.0243012	42.8	8
OV	TCGA-09-1674-01	0.0740251	51.6	8
OV	TCGA-09-1675-01	0.0420597	80	1
OV	TCGA-09-2044-01	0.0669217	60.3	4
OV	TCGA-09-2045-01	0.0293483	34.8	2
OV	TCGA-09-2048-01	NA	37.6	1
OV	TCGA-09-2049-01	0.0876712	65.7	10
OV	TCGA-09-2050-01	0.0695387	85.6	3
OV	TCGA-09-2051-01	0.201513	60	1
OV	TCGA-09-2053-01	0.0592575	67.5	2
OV	TCGA-09-2054-01	NA	54.2	9
OV	TCGA-09-2056-01	0.0558927	89.9	6
OV	TCGA-10-0926-01	0.0104682	45.2	11
OV	TCGA-10-0927-01	0.0134591	61.3	8
OV	TCGA-10-0928-01	0.0052341	88.1	8
OV	TCGA-10-0930-01	0.0972047	58	3
OV	TCGA-10-0931-01	0.0504717	35.8	2
OV	TCGA-10-0933-01	0.035891	46.8	9
OV	TCGA-10-0934-01	0.0411251	12	3
OV	TCGA-10-0935-01	0.0278529	61	3
OV	TCGA-10-0936-01	NA	42.1	8
OV	TCGA-10-0937-01	0.00355171	40	3
OV	TCGA-10-0938-01	NA	31.8	8
OV	TCGA-13-0720-01	0.00635569	65	1
OV	TCGA-13-0723-01	0.0325262	54.3	1
OV	TCGA-13-0724-01	0.0229926	35.4	2
OV	TCGA-13-0726-01	0.0600052	43.3	1
OV	TCGA-13-0751-01	0.10113	72.6	6
OV	TCGA-13-0755-01	0.0736513	40.1	6
OV	TCGA-13-0765-01	0.0211233	36.5	3
OV	TCGA-13-0766-01	0.00486023	37.1	2
OV	TCGA-13-0791-01	0.0527149	37.3	1
OV	TCGA-13-0795-01	0.0418728	38	2
OV	TCGA-13-0797-01	0.024862	40.4	3
OV	TCGA-13-0799-01	NA	37.9	4
OV	TCGA-13-0800-01	0.0486023	38.5	2
OV	TCGA-13-0801-01	NA	82.6	1
OV	TCGA-13-0804-01	0.0190671	62.2	2
OV	TCGA-13-0807-01	0.135339	41.3	12
OV	TCGA-13-0883-01	0.0353302	60.7	5
OV	TCGA-13-0884-01	0.0678564	32.6	4
OV	TCGA-13-0885-01	0.099261	49.5	4
OV	TCGA-13-0886-01	0.0263574	33.5	1
OV	TCGA-13-0887-01	0.0689779	66.2	5
OV	TCGA-13-0888-01	0.123936	39.3	7
OV	TCGA-13-0889-01	0.00729035	35.7	1
OV	TCGA-13-0890-01	0.0420597	36.2	4
OV	TCGA-13-0891-01	0.0173847	72.5	3
OV	TCGA-13-0893-01	0.0564535	53	6
OV	TCGA-13-0894-01	0.0530887	59.4	5
OV	TCGA-13-0897-01	0.0353302	37.7	6
OV	TCGA-13-0899-01	0.0121506	43.3	4
OV	TCGA-13-0900-01	NA	68.6	4
OV	TCGA-13-0901-01	NA	55.8	13
OV	TCGA-13-0903-01	0.120945	61.4	6
OV	TCGA-13-0904-01	0.0349563	62.2	8
OV	TCGA-13-0905-01	0.049537	48.8	3
OV	TCGA-13-0906-01	0.0201887	57	1
OV	TCGA-13-0908-01	0.0848672	36.5	4
OV	TCGA-13-0910-01	0.0261705	71	2
OV	TCGA-13-0911-01	0.0108421	50	3
OV	TCGA-13-0912-01	0.024675	35.5	7
OV	TCGA-13-0913-01	0.0224319	88.7	11
OV	TCGA-13-0913-02	NA	85.5	6
OV	TCGA-13-0916-01	0.0201887	93.1	5
OV	TCGA-13-0919-01	0.00915967	53.6	5
OV	TCGA-13-0920-01	0.139264	57.9	8
OV	TCGA-13-0921-01	0.04692	63.7	9
OV	TCGA-13-0923-01	0.0280398	55.3	6
OV	TCGA-13-0924-01	0.0431813	38.5	4
OV	TCGA-13-1403-01	0.0261705	37.8	4
OV	TCGA-13-1404-01	0.0386949	79.4	3
OV	TCGA-13-1405-01	0.0334608	77.4	3
OV	TCGA-13-1407-01	NA	69.5	5
OV	TCGA-13-1408-01	NA	49.4	2
OV	TCGA-13-1409-01	0.0392557	66.8	3
OV	TCGA-13-1410-01	0.0557058	59.5	11
OV	TCGA-13-1411-01	0.035891	25.9	4
OV	TCGA-13-1412-01	0.0343955	40.7	3
OV	TCGA-13-1477-01	0.00261705	NA	1
OV	TCGA-13-1481-01	0.0996348	40.1	3
OV	TCGA-13-1482-01	0.0390688	41.5	3
OV	TCGA-13-1483-01	0.0489762	39	8
OV	TCGA-13-1484-01	0.0291614	27.6	3
OV	TCGA-13-1485-01	0.00766422	20.5	2
OV	TCGA-13-1487-01	0.0158892	NA	8
OV	TCGA-13-1488-01	0.09627	29.3	3
OV	TCGA-13-1489-01	0.0542103	82.4	5
OV	TCGA-13-1489-02	NA	62.4	1
OV	TCGA-13-1491-01	0.0287875	88.6	9
OV	TCGA-13-1492-01	0.00710342	NA	3
OV	TCGA-13-1494-01	0.0592575	36.8	1
OV	TCGA-13-1495-01	0.00915967	40.9	7
OV	TCGA-13-1496-01	0.0390688	52.2	7
OV	TCGA-13-1497-01	0.0925314	54.8	23
OV	TCGA-13-1498-01	0.088232	37.6	7
OV	TCGA-13-1499-01	0.0420597	22.6	1
OV	TCGA-13-1500-01	0.0738382	31.4	3
OV	TCGA-13-1501-01	0.054958	40.5	6
OV	TCGA-13-1504-01	0.0213103	32.2	7
OV	TCGA-13-1505-01	0.0179455	NA	6
OV	TCGA-13-1506-01	0.01645	43.4	13
OV	TCGA-13-1507-01	0.0547711	34.5	3
OV	TCGA-13-1509-01	0.0600052	65	6
OV	TCGA-13-1510-01	0.027666	NA	1
OV	TCGA-13-1511-01	0.0117767	29.2	3
OV	TCGA-13-1512-01	0.0435552	67.4	2
OV	TCGA-13-2057-01	0.0998217	48.6	1
OV	TCGA-13-2059-01	0.0527149	65.9	1
OV	TCGA-13-2060-01	0.0388819	56.6	5
OV	TCGA-13-2061-01	0.0686041	57.7	2
OV	TCGA-13-2065-01	0.0321523	57	1
OV	TCGA-13-2066-01	0.0190671	40.6	1
OV	TCGA-13-2071-01	0.0353302	33.4	2
OV	TCGA-20-0987-01	0.0261705	38.2	4
OV	TCGA-20-0990-01	0.0555188	52.6	22
OV	TCGA-20-0991-01	0.0282267	NA	11
OV	TCGA-20-1682-01	0.049537	75.3	8
OV	TCGA-20-1683-01	0.0543972	54.9	7
OV	TCGA-20-1684-01	0.0244881	55.9	13
OV	TCGA-20-1685-01	0.0411251	56.8	7
OV	TCGA-20-1686-01	0.0491631	63.1	16
OV	TCGA-20-1687-01	0.0433682	58.2	8
OV	TCGA-23-1021-01	0.0572012	78.9	5
OV	TCGA-23-1022-01	0.109729	60	21
OV	TCGA-23-1023-01	NA	32.4	4
OV	TCGA-23-1024-01	NA	53.4	8
OV	TCGA-23-1026-01	NA	27.3	6
OV	TCGA-23-1027-01	0.0310307	45.4	8
OV	TCGA-23-1028-01	NA	80.8	3
OV	TCGA-23-1029-01	0.0543972	38.9	7
OV	TCGA-23-1030-01	0.0308438	44	6
OV	TCGA-23-1031-01	0.105804	42.9	3
OV	TCGA-23-1032-01	0.106364	29.8	6
OV	TCGA-23-1107-01	NA	20.1	2
OV	TCGA-23-1109-01	NA	55	5
OV	TCGA-23-1110-01	0.0886058	NA	6
OV	TCGA-23-1111-01	0.0345824	61	7
OV	TCGA-23-1113-01	0.0300961	88.8	4
OV	TCGA-23-1114-01	0.0856149	68.4	8
OV	TCGA-23-1116-01	0.152724	15	10
OV	TCGA-23-1117-01	0.0777638	56.3	6
OV	TCGA-23-1118-01	0.0463592	42.9	2
OV	TCGA-23-1119-01	NA	41.8	1
OV	TCGA-23-1120-01	NA	47	4
OV	TCGA-23-1121-01	0.272173	51.1	12
OV	TCGA-23-1122-01	0.0889797	51.5	4
OV	TCGA-23-1123-01	0.0557058	59.9	11
OV	TCGA-23-1124-01	0.0921575	63.2	9
OV	TCGA-23-1809-01	0.0284137	51.6	8
OV	TCGA-23-2072-01	0.0353302	52.4	3
OV	TCGA-23-2077-01	0.0635569	61.2	7
OV	TCGA-23-2078-01	0.179081	36.5	2
OV	TCGA-23-2079-01	0.0418728	47.3	12
OV	TCGA-23-2081-01	0.0865496	44.6	4
OV	TCGA-23-2084-01	0.134404	67	4
OV	TCGA-23-2641-01	0.0600052	80.7	1
OV	TCGA-23-2643-01	0.0254228	64.6	1
OV	TCGA-23-2645-01	0.0844933	54.6	1
OV	TCGA-23-2647-01	0.0343955	30.4	1
OV	TCGA-23-2649-01	0.0837456	40.7	1
OV	TCGA-24-0966-01	0.0299091	24.4	7
OV	TCGA-24-0968-01	NA	32	5
OV	TCGA-24-0970-01	0.0153284	46.3	3
OV	TCGA-24-0975-01	0.101504	9.29	3
OV	TCGA-24-0979-01	0.0725297	56.9	8
OV	TCGA-24-0980-01	0.0289745	28.9	5
OV	TCGA-24-0982-01	0.0414989	52.8	15
OV	TCGA-24-1103-01	0.0482285	61	3
OV	TCGA-24-1104-01	0.0564535	46.5	4
OV	TCGA-24-1105-01	NA	46.9	8
OV	TCGA-24-1413-01	0.0282267	75.5	3
OV	TCGA-24-1416-01	0.011029	23	5
OV	TCGA-24-1417-01	0.0611268	59.8	6
OV	TCGA-24-1418-01	0.0315915	54.5	7
OV	TCGA-24-1419-01	0.0224319	39.7	2
OV	TCGA-24-1422-01	0.116833	52.3	4
OV	TCGA-24-1423-01	0.0611268	47.9	3
OV	TCGA-24-1424-01	0.038508	50	8
OV	TCGA-24-1425-01	0.0615007	41.3	1
OV	TCGA-24-1426-01	0.174408	83.4	10
OV	TCGA-24-1427-01	0.0355171	51.2	7
OV	TCGA-24-1428-01	0.0515933	69.8	7
OV	TCGA-24-1430-01	0.0297222	60.9	1
OV	TCGA-24-1431-01	0.167304	NA	10
OV	TCGA-24-1434-01	0.0360779	13.8	3
OV	TCGA-24-1435-01	0.0644916	37.1	5
OV	TCGA-24-1436-01	0.0510325	35.7	8
OV	TCGA-24-1463-01	0.0480416	60.5	5
OV	TCGA-24-1464-01	0.0398165	37.3	4
OV	TCGA-24-1466-01	0.0342086	61.9	5
OV	TCGA-24-1467-01	0.0057949	38.7	3
OV	TCGA-24-1469-01	0.125431	40.3	7
OV	TCGA-24-1470-01	0.0420597	36.2	4
OV	TCGA-24-1471-01	0.0226188	27.6	5
OV	TCGA-24-1474-01	0.0353302	40.5	12
OV	TCGA-24-1544-01	NA	57.6	10
OV	TCGA-24-1545-01	NA	18.4	1
OV	TCGA-24-1546-01	NA	37.6	1
OV	TCGA-24-1548-01	NA	60.9	8
OV	TCGA-24-1549-01	0.0216841	38.4	12
OV	TCGA-24-1550-01	0.0388819	46.3	3
OV	TCGA-24-1551-01	0.0327131	37.5	4
OV	TCGA-24-1552-01	0.0282267	43.5	12
OV	TCGA-24-1553-01	NA	40.2	2
OV	TCGA-24-1556-01	NA	55.6	5
OV	TCGA-24-1557-01	NA	58.6	7
OV	TCGA-24-1558-01	NA	61.1	18
OV	TCGA-24-1560-01	NA	47.8	5
OV	TCGA-24-1562-01	0.0209364	31.1	3
OV	TCGA-24-1563-01	0.0480416	44.6	5
OV	TCGA-24-1564-01	0.0252358	25.3	2
OV	TCGA-24-1565-01	0.0198148	17.3	2
OV	TCGA-24-1567-01	NA	88.3	1
OV	TCGA-24-1603-01	0.01645	78.7	4
OV	TCGA-24-1604-01	NA	49.5	7
OV	TCGA-24-1614-01	NA	74.7	6
OV	TCGA-24-1616-01	0.0315915	54.7	17
OV	TCGA-24-1842-01	0.0229926	43	9
OV	TCGA-24-1843-01	0.0484154	44.2	9
OV	TCGA-24-1844-01	0.0917837	51.7	10
OV	TCGA-24-1845-01	0.174782	62.4	11
OV	TCGA-24-1846-01	0.0805677	91.6	3
OV	TCGA-24-1847-01	0.0676694	50.2	3
OV	TCGA-24-1849-01	0.0652393	25.9	2
OV	TCGA-24-1850-01	0.0521541	38.2	5
OV	TCGA-24-1920-01	NA	57.7	18
OV	TCGA-24-1923-01	NA	21.3	1
OV	TCGA-24-1924-01	NA	54.4	3
OV	TCGA-24-1928-01	NA	49.9	5
OV	TCGA-24-1930-01	NA	59.6	1
OV	TCGA-24-2019-01	0.085241	57.4	4
OV	TCGA-24-2020-01	NA	64.4	10
OV	TCGA-24-2023-01	NA	81.7	7
OV	TCGA-24-2024-01	0.0815024	86.8	2
OV	TCGA-24-2026-01	NA	51.5	3
OV	TCGA-24-2027-01	NA	84.9	5
OV	TCGA-24-2030-01	0.0775768	54.3	13
OV	TCGA-24-2033-01	0.0697257	44.8	3
OV	TCGA-24-2035-01	0.114589	30.4	4
OV	TCGA-24-2036-01	0.0332739	24.1	1
OV	TCGA-24-2038-01	0.00729035	18.9	1
OV	TCGA-24-2254-01	0.0474808	85.4	5
OV	TCGA-24-2260-01	0.0431813	61.2	8
OV	TCGA-24-2261-01	0.0278529	51.3	8
OV	TCGA-24-2262-01	0.0704734	33.3	2
OV	TCGA-24-2267-01	0.0775768	33.1	4
OV	TCGA-24-2271-01	0.0444898	35.1	3
OV	TCGA-24-2281-01	0.0575751	24.6	3
OV	TCGA-24-2288-01	0.10543	44.1	1
OV	TCGA-24-2289-01	0.116459	46.7	5
OV	TCGA-24-2290-01	0.0370126	64.4	2
OV	TCGA-24-2293-01	0.105617	19.4	2
OV	TCGA-24-2297-01	NA	36.7	2
OV	TCGA-24-2298-01	0.108047	24.2	2
OV	TCGA-25-1312-01	0.0151415	62.2	6
OV	TCGA-25-1313-01	0.123001	68.7	2
OV	TCGA-25-1314-01	0.049537	57.3	7
OV	TCGA-25-1315-01	0.0443029	49.9	4
OV	TCGA-25-1316-01	0.00710342	71.1	3
OV	TCGA-25-1317-01	NA	61.8	2
OV	TCGA-25-1318-01	NA	47.2	6
OV	TCGA-25-1319-01	0.0433682	48.8	19
OV	TCGA-25-1320-01	0.0592575	46.1	5
OV	TCGA-25-1321-01	0.019254	63.3	5
OV	TCGA-25-1322-01	0.0429944	50.3	5
OV	TCGA-25-1323-01	0.0560796	61.1	8
OV	TCGA-25-1326-01	0.149733	NA	5
OV	TCGA-25-1328-01	0.0278529	NA	1
OV	TCGA-25-1329-01	0.0355171	59.1	16
OV	TCGA-25-1623-01	NA	16.2	2
OV	TCGA-25-1625-01	NA	35.5	2
OV	TCGA-25-1626-01	NA	8.85	1
OV	TCGA-25-1627-01	NA	45.1	10
OV	TCGA-25-1628-01	NA	18.4	1
OV	TCGA-25-1630-01	NA	30.2	1
OV	TCGA-25-1631-01	NA	40.8	3
OV	TCGA-25-1632-01	NA	55.2	6
OV	TCGA-25-1633-01	NA	28.8	3
OV	TCGA-25-1634-01	NA	55.2	3
OV	TCGA-25-1635-01	NA	19.3	9
OV	TCGA-25-1870-01	NA	59.4	5
OV	TCGA-25-1871-01	NA	54.3	6
OV	TCGA-25-1877-01	NA	65.8	6
OV	TCGA-25-1878-01	NA	36	2
OV	TCGA-25-2042-01	0.13347	36.4	1
OV	TCGA-25-2391-01	0.04692	36.9	2
OV	TCGA-25-2392-01	0.0708473	47.6	4
OV	TCGA-25-2393-01	0.0428075	45	7
OV	TCGA-25-2396-01	0.019254	45.3	13
OV	TCGA-25-2397-01	0.0435552	45.5	6
OV	TCGA-25-2398-01	0.0317785	47.7	3
OV	TCGA-25-2399-01	0.0269182	24.3	8
OV	TCGA-25-2400-01	0.0557058	45.2	12
OV	TCGA-25-2401-01	0.0542103	37.3	4
OV	TCGA-25-2404-01	0.0360779	43.7	2
OV	TCGA-25-2408-01	0.00953354	17.2	1
OV	TCGA-25-2409-01	0.0158892	28.9	10
OV	TCGA-29-1688-01	0.0345824	51.5	3
OV	TCGA-29-1690-01	0.0987002	15.2	1
OV	TCGA-29-1691-01	0.123188	63.5	18
OV	TCGA-29-1693-01	0.0835587	62.8	11
OV	TCGA-29-1694-01	0.0235534	46.2	4
OV	TCGA-29-1695-01	0.0282267	62.1	9
OV	TCGA-29-1696-01	0.0414989	32.3	4
OV	TCGA-29-1697-01	0.0295353	79.7	2
OV	TCGA-29-1698-01	0.038508	49.5	8
OV	TCGA-29-1699-01	0.0499109	38.5	7
OV	TCGA-29-1701-01	0.0486023	47.6	8
OV	TCGA-29-1702-01	0.027666	65.8	19
OV	TCGA-29-1703-01	0.0400035	52.2	20
OV	TCGA-29-1705-01	0.0336478	46.8	10
OV	TCGA-29-1705-02	NA	39.6	2
OV	TCGA-29-1707-01	0.0295353	53	3
OV	TCGA-29-1707-02	NA	67.5	1
OV	TCGA-29-1710-01	0.0414989	36.5	7
OV	TCGA-29-1710-02	NA	49.5	8
OV	TCGA-29-1711-01	0.0379472	41.7	3
OV	TCGA-29-1761-01	0.100756	44.9	13
OV	TCGA-29-1762-01	0.0461722	87.2	4
OV	TCGA-29-1763-01	0.162444	75.5	4
OV	TCGA-29-1764-01	0.0586967	47.2	3
OV	TCGA-29-1766-01	0.0648654	56.6	4
OV	TCGA-29-1768-01	0.030283	37.7	4
OV	TCGA-29-1769-01	0.0517802	49.2	9
OV	TCGA-29-1770-01	0.126553	54.7	9
OV	TCGA-29-1770-02	NA	58.6	7
OV	TCGA-29-1771-01	0.0162631	20.7	3
OV	TCGA-29-1774-01	0.0435552	40.5	1
OV	TCGA-29-1775-01	0.0757075	66.3	4
OV	TCGA-29-1776-01	0.030283	41.5	4
OV	TCGA-29-1777-01	0.0848672	54.6	2
OV	TCGA-29-1778-01	0.027666	48.8	15
OV	TCGA-29-1781-01	0.0626223	78.3	3
OV	TCGA-29-1783-01	0.0379472	52.3	12
OV	TCGA-29-1784-01	0.0749598	52.7	6
OV	TCGA-29-1785-01	0.0409381	21.6	4
OV	TCGA-29-2414-01	NA	55.8	4
OV	TCGA-29-2414-02	NA	57.8	5
OV	TCGA-29-2425-01	NA	54.9	9
OV	TCGA-29-2427-01	0.0448637	35.4	5
OV	TCGA-29-2428-01	NA	65.2	1
OV	TCGA-29-2429-01	0.0489762	24.1	1
OV	TCGA-29-2432-01	0.0536495	44.9	2
OV	TCGA-29-2434-01	0.0663609	60.8	2
OV	TCGA-29-2436-01	0.00560796	10.9	1
OV	TCGA-30-1714-01	0.0371995	59	13
OV	TCGA-30-1718-01	0.0822501	53.5	2
OV	TCGA-30-1853-01	0.0542103	63.5	10
OV	TCGA-30-1855-01	0.0697257	38.3	2
OV	TCGA-30-1856-01	0.0362648	30.7	3
OV	TCGA-30-1857-01	0.0536495	40.5	9
OV	TCGA-30-1859-01	NA	54.8	5
OV	TCGA-30-1860-01	NA	89.2	5
OV	TCGA-30-1861-01	NA	50.9	3
OV	TCGA-30-1862-01	0.0708473	48.1	2
OV	TCGA-30-1866-01	NA	50.5	9
OV	TCGA-30-1867-01	NA	35	2
OV	TCGA-30-1887-01	NA	25	1
OV	TCGA-30-1891-01	0.0457984	54.2	3
OV	TCGA-30-1892-01	NA	35.7	3
OV	TCGA-31-1944-01	NA	42.3	2
OV	TCGA-31-1946-01	NA	39	1
OV	TCGA-31-1950-01	0.0667348	35.7	2
OV	TCGA-31-1951-01	NA	32.8	7
OV	TCGA-31-1953-01	0.0710342	27.1	2
OV	TCGA-31-1956-01	NA	33.6	1
OV	TCGA-31-1959-01	0.0616876	75.7	6
OV	TCGA-36-1568-01	NA	33	7
OV	TCGA-36-1569-01	NA	38.8	1
OV	TCGA-36-1570-01	NA	35.8	4
OV	TCGA-36-1571-01	NA	54	8
OV	TCGA-36-1574-01	NA	37.1	7
OV	TCGA-36-1575-01	NA	60.6	7
OV	TCGA-36-1576-01	NA	30.6	2
OV	TCGA-36-1577-01	NA	47.2	7
OV	TCGA-36-1578-01	NA	58	8
OV	TCGA-36-1580-01	NA	45	3
OV	TCGA-36-1581-01	NA	27.6	3
OV	TCGA-36-2530-01	0.0459853	40.1	1
OV	TCGA-36-2532-01	0.0256097	26	1
OV	TCGA-36-2533-01	0.0497239	59.4	2
OV	TCGA-36-2534-01	0.0822501	45.9	3
OV	TCGA-36-2537-01	0.0300961	27	1
OV	TCGA-36-2538-01	0.0293483	43.6	2
OV	TCGA-36-2539-01	0.0407512	NA	2
OV	TCGA-36-2540-01	0.00205625	6.76	1
OV	TCGA-36-2542-01	0.0450506	40.2	2
OV	TCGA-36-2543-01	0.0403773	63.7	3
OV	TCGA-36-2544-01	0.0431813	31.6	1
OV	TCGA-36-2545-01	0.041312	40.7	1
OV	TCGA-36-2547-01	0.0917837	55.9	1
OV	TCGA-36-2548-01	0.024675	65.1	1
OV	TCGA-36-2551-01	0.0196279	40.5	1
OV	TCGA-36-2552-01	0.0353302	39.4	1
OV	TCGA-42-2582-01	0.0624353	29.7	1
OV	TCGA-42-2587-01	0.0858018	31	1
OV	TCGA-42-2589-01	0.0600052	76	1
OV	TCGA-42-2590-01	0.0371995	30.1	1
OV	TCGA-42-2591-01	0.0472938	86.3	3
OV	TCGA-57-1582-01	NA	53.1	8
OV	TCGA-57-1583-01	NA	57.3	17
OV	TCGA-57-1584-01	NA	45.6	5
OV	TCGA-57-1585-01	NA	44.2	7
OV	TCGA-57-1586-01	0.00560796	46.8	7
OV	TCGA-57-1993-01	0.0809416	47.1	11
OV	TCGA-57-1994-01	0.0323393	42.9	7
OV	TCGA-59-2348-01	0.0697257	51.1	1
OV	TCGA-59-2350-01	0.0229926	84.3	1
OV	TCGA-59-2351-01	0.0712211	41.6	3
OV	TCGA-59-2352-01	0.0512194	45.3	14
OV	TCGA-59-2354-01	0.0540234	31.1	2
OV	TCGA-59-2355-01	0.0128983	35.4	4
OV	TCGA-59-2363-01	0.0558927	84.6	8
OV	TCGA-59-2372-01	0.0482285	60.2	2
OV	TCGA-61-1722-01	0.0400035	30.1	3
OV	TCGA-61-1724-01	NA	90.2	9
OV	TCGA-61-1725-01	0.0805677	42.8	6
OV	TCGA-61-1727-01	0.0785115	25	1
OV	TCGA-61-1728-01	0.0811285	39.1	6
OV	TCGA-61-1730-01	0.100569	51.4	2
OV	TCGA-61-1733-01	0.027479	59.8	12
OV	TCGA-61-1736-01	0.0697257	32.1	2
OV	TCGA-61-1737-01	0.0736513	41.2	4
OV	TCGA-61-1738-01	0.0319654	15.7	6
OV	TCGA-61-1740-01	0.123749	59.9	11
OV	TCGA-61-1741-01	0.0188801	43.5	14
OV	TCGA-61-1743-01	NA	61.9	7
OV	TCGA-61-1895-01	0.038508	42.2	3
OV	TCGA-61-1899-01	0.035891	61.4	8
OV	TCGA-61-1900-01	0.0557058	47.3	11
OV	TCGA-61-1901-01	0.0338347	37.2	2
OV	TCGA-61-1903-01	0.0557058	40	2
OV	TCGA-61-1904-01	0.09627	40.7	14
OV	TCGA-61-1906-01	0.0343955	76.5	7
OV	TCGA-61-1907-01	0.0700995	64.1	12
OV	TCGA-61-1910-01	0.0790723	37	11
OV	TCGA-61-1911-01	0.0351432	26.7	6
OV	TCGA-61-1913-01	0.0317785	66.8	6
OV	TCGA-61-1914-01	0.071595	39.8	8
OV	TCGA-61-1915-01	0.0596313	57.5	10
OV	TCGA-61-1917-01	NA	64.5	6
OV	TCGA-61-1918-01	NA	46.3	16
OV	TCGA-61-1919-01	0.0839325	53.9	4
OV	TCGA-61-1995-01	0.0521541	79	3
OV	TCGA-61-1998-01	0.2017	32.1	5
OV	TCGA-61-2000-01	0.0689779	34.7	11
OV	TCGA-61-2002-01	0.0338347	34.6	2
OV	TCGA-61-2003-01	0.110103	47.1	4
OV	TCGA-61-2008-01	0.0482285	64.5	9
OV	TCGA-61-2008-02	NA	54.2	4
OV	TCGA-61-2009-01	0.0443029	38.2	4
OV	TCGA-61-2012-01	0.0951484	20.8	5
OV	TCGA-61-2016-01	0.0194409	76.5	4
OV	TCGA-61-2088-01	0.0112159	62.1	9
OV	TCGA-61-2092-01	0.0443029	9.51	5
OV	TCGA-61-2094-01	0.0446768	28.2	1
OV	TCGA-61-2095-01	0.326944	2.28	2
OV	TCGA-61-2095-02	NA	11.7	2
OV	TCGA-61-2097-01	0.046733	76.4	5
OV	TCGA-61-2098-01	NA	59.8	6
OV	TCGA-61-2101-01	0.0308438	56.1	7
OV	TCGA-61-2102-01	0.043929	48.5	14
OV	TCGA-61-2104-01	0.0422467	55	7
OV	TCGA-61-2109-01	0.0547711	53.9	1
OV	TCGA-61-2110-01	0.122254	63.5	2
OV	TCGA-61-2111-01	0.0654262	30.3	5
OV	TCGA-61-2113-01	0.236469	40.5	9
OV	TCGA-61-2610-02	0.0800069	40	1
OV	TCGA-61-2611-02	0.0370126	23.7	1
OV	TCGA-61-2612-01	0.0218711	32.2	2
OV	TCGA-61-2613-01	0.0433682	30.4	2
OV	TCGA-61-2614-01	0.0304699	41.2	1
PRAD	TCGA-CH-5737-01	0.0254228	5.24	5
PRAD	TCGA-CH-5738-01	0.00448637	0.104	4
PRAD	TCGA-CH-5739-01	0.0228057	8.25	1
PRAD	TCGA-CH-5740-01	0.00729035	7.28	5
PRAD	TCGA-CH-5741-01	0.00803808	5.4	3
PRAD	TCGA-CH-5743-01	NA	0.0226	2
PRAD	TCGA-CH-5744-01	0.0119637	4.81	1
PRAD	TCGA-CH-5745-01	0.0106551	3.89	2
PRAD	TCGA-CH-5746-01	0.00486023	0.158	1
PRAD	TCGA-CH-5748-01	0.0140199	0.225	3
PRAD	TCGA-CH-5750-01	0.0162631	1.11	2
PRAD	TCGA-CH-5751-01	0.0128983	18.2	2
PRAD	TCGA-CH-5752-01	0.0157023	3.01	3
PRAD	TCGA-CH-5753-01	0.0207495	14.9	1
PRAD	TCGA-CH-5754-01	0.0534626	19.1	1
PRAD	TCGA-CH-5761-01	0.0239273	29	1
PRAD	TCGA-CH-5762-01	0.0241142	6.37	3
PRAD	TCGA-CH-5763-01	0.00243012	0.00336	1
PRAD	TCGA-CH-5764-01	0.0112159	5.37	1
PRAD	TCGA-CH-5765-01	0.0142068	5.11	1
PRAD	TCGA-CH-5766-01	0.0134591	5.75	2
PRAD	TCGA-CH-5767-01	0.0183193	7.84	3
PRAD	TCGA-CH-5768-01	0.0160762	3.76	1
PRAD	TCGA-CH-5769-01	0.024862	2.67	2
PRAD	TCGA-CH-5771-01	0.00953354	0.153	1
PRAD	TCGA-CH-5772-01	0.0153284	1.35	5
PRAD	TCGA-CH-5788-01	0.0207495	23.7	2
PRAD	TCGA-CH-5789-01	0.00280398	0.00344	1
PRAD	TCGA-CH-5790-01	0.0057949	2.9	1
PRAD	TCGA-CH-5791-01	0.0188801	11.4	3
PRAD	TCGA-CH-5792-01	0.0145807	0.127	1
PRAD	TCGA-CH-5794-01	0.0153284	4.13	2
PRAD	TCGA-EJ-5494-01	0.00747728	0.0605	2
PRAD	TCGA-EJ-5495-01	0.0342086	9.72	3
PRAD	TCGA-EJ-5496-01	0.0142068	6.44	3
PRAD	TCGA-EJ-5497-01	0.00598183	2.1	1
PRAD	TCGA-EJ-5498-01	0.0108421	0.0301	4
PRAD	TCGA-EJ-5499-01	0.0143938	4.11	4
PRAD	TCGA-EJ-5501-01	0.0134591	0.13	2
PRAD	TCGA-EJ-5502-01	0.00186932	0.00403	2
PRAD	TCGA-EJ-5503-01	0.000560796	0.0157	2
PRAD	TCGA-EJ-5504-01	0.0162631	1.57	3
PRAD	TCGA-EJ-5505-01	0.0147676	3.87	5
PRAD	TCGA-EJ-5506-01	0.000934661	0.000582	6
PRAD	TCGA-EJ-5507-01	0.0153284	16.4	6
PRAD	TCGA-EJ-5508-01	0.00785115	0.153	2
PRAD	TCGA-EJ-5509-01	0.00841195	12.8	3
PRAD	TCGA-EJ-5510-01	0.0108421	4.18	2
PRAD	TCGA-EJ-5511-01	0.0188801	13.8	2
PRAD	TCGA-EJ-5512-01	0.00635569	0.0138	1
PRAD	TCGA-EJ-5514-01	0.0123375	15.7	5
PRAD	TCGA-EJ-5515-01	0.00261705	0.0045	2
PRAD	TCGA-EJ-5516-01	0.00803808	0.331	2
PRAD	TCGA-EJ-5517-01	0.0106551	3.03	2
PRAD	TCGA-EJ-5518-01	0.0153284	16.4	3
PRAD	TCGA-EJ-5519-01	0.0450506	13	3
PRAD	TCGA-EJ-5521-01	0.0145807	2.06	4
PRAD	TCGA-EJ-5522-01	0.00878581	2.28	3
PRAD	TCGA-EJ-5524-01	0.0170108	4.94	1
PRAD	TCGA-EJ-5525-01	0.0343955	20.2	2
PRAD	TCGA-EJ-5526-01	0.0112159	11.8	3
PRAD	TCGA-EJ-5527-01	0.013646	4.6	3
PRAD	TCGA-EJ-5530-01	0.0130852	1.38	1
PRAD	TCGA-EJ-5531-01	0.0100943	0.116	4
PRAD	TCGA-EJ-5532-01	0.0100943	6.82	1
PRAD	TCGA-EJ-5542-01	0.0104682	6.84	2
PRAD	TCGA-EJ-7115-01	0.0205625	4.75	3
PRAD	TCGA-EJ-7123-01	0.0213103	4.93	4
PRAD	TCGA-EJ-7125-01	0.033087	0.337	3
PRAD	TCGA-EJ-7218-01	0.0104682	3	3
PRAD	TCGA-EJ-7312-01	0.0130852	14.3	2
PRAD	TCGA-EJ-7314-01	0.0168239	2.55	2
PRAD	TCGA-EJ-7315-01	0.00729035	8.58	3
PRAD	TCGA-EJ-7317-01	0.0179455	1.71	1
PRAD	TCGA-EJ-7318-01	0.0106551	2.81	3
PRAD	TCGA-EJ-7321-01	0.0115898	0.941	1
PRAD	TCGA-EJ-7325-01	0.0134591	4.28	1
PRAD	TCGA-EJ-7327-01	0.0102813	1.77	4
PRAD	TCGA-EJ-7328-01	0.011029	2.91	1
PRAD	TCGA-EJ-7330-01	0.0155154	5.45	2
PRAD	TCGA-EJ-7331-01	0.0123375	1.78	2
PRAD	TCGA-EJ-7781-01	0.0196279	5.11	3
PRAD	TCGA-EJ-7782-01	0.142629	11.8	4
PRAD	TCGA-EJ-7783-01	0.0108421	1.36	3
PRAD	TCGA-EJ-7784-01	0.0151415	17.7	5
PRAD	TCGA-EJ-7785-01	0.00897274	0.879	1
PRAD	TCGA-EJ-7786-01	0.00972047	5.61	1
PRAD	TCGA-EJ-7788-01	0.0168239	6.07	3
PRAD	TCGA-EJ-7789-01	0.0147676	31.8	2
PRAD	TCGA-EJ-7791-01	0.0052341	0.00765	2
PRAD	TCGA-EJ-7792-01	0.00972047	2.34	2
PRAD	TCGA-EJ-7793-01	0.00261705	0.00802	1
PRAD	TCGA-EJ-7794-01	0.00486023	0.0267	2
PRAD	TCGA-EJ-7797-01	0.00654262	0.00556	1
PRAD	TCGA-EJ-8468-01	0.0145807	7.84	3
PRAD	TCGA-EJ-8469-01	0.00691649	16.9	3
PRAD	TCGA-EJ-8470-01	0.0112159	7.08	2
PRAD	TCGA-EJ-8472-01	0.0213103	15.2	2
PRAD	TCGA-EJ-8474-01	0.0173847	0.875	3
PRAD	TCGA-EJ-A46B-01	0.000373864	0.00416	2
PRAD	TCGA-EJ-A46D-01	0.00392557	0.0331	3
PRAD	TCGA-EJ-A46E-01	0.000186932	0.00267	2
PRAD	TCGA-EJ-A46F-01	0.016637	13.6	3
PRAD	TCGA-EJ-A46G-01	0.0229926	19.1	1
PRAD	TCGA-EJ-A46H-01	0.000373864	0.000422	1
PRAD	TCGA-EJ-A46I-01	0.00280398	0.00368	1
PRAD	TCGA-EJ-A65B-01	0.00897274	0.00216	2
PRAD	TCGA-EJ-A65D-01	0.0132722	6.73	2
PRAD	TCGA-EJ-A65E-01	0.0183193	3.61	4
PRAD	TCGA-EJ-A65F-01	0.0420597	14.6	1
PRAD	TCGA-EJ-A65G-01	0.00803808	0.00197	2
PRAD	TCGA-EJ-A65J-01	0.0216841	6.87	2
PRAD	TCGA-EJ-A65M-01	0.0142068	5.1	4
PRAD	TCGA-EJ-A6RA-01	0.00243012	0.0011	1
PRAD	TCGA-EJ-A6RC-01	0.00336478	0.0135	4
PRAD	TCGA-EJ-A7NF-01	0.00710342	1.46	1
PRAD	TCGA-EJ-A7NG-01	0.000747728	0.00365	1
PRAD	TCGA-EJ-A7NH-01	0.00803808	2.13	2
PRAD	TCGA-EJ-A7NJ-01	0.00130852	0.00275	1
PRAD	TCGA-EJ-A7NK-01	0.000373864	0.0174	1
PRAD	TCGA-EJ-A7NM-01	0.0252358	6.91	2
PRAD	TCGA-EJ-A7NN-01	0.0183193	NA	1
PRAD	TCGA-EJ-A8FN-01	0.0175716	7.87	2
PRAD	TCGA-EJ-A8FS-01	0.0175716	8.8	2
PRAD	TCGA-FC-7708-01	0.00841195	0.08	2
PRAD	TCGA-FC-7961-01	0.0257966	18.6	6
PRAD	TCGA-FC-A4JI-01	0.0149546	44.4	1
PRAD	TCGA-FC-A5OB-01	0.0100943	3.07	1
PRAD	TCGA-FC-A66V-01	NA	0.00192	1
PRAD	TCGA-FC-A6HD-01	0.0171978	0.946	1
PRAD	TCGA-G9-6329-01	0.00953354	1.06	2
PRAD	TCGA-G9-6332-01	0.0114029	3.96	2
PRAD	TCGA-G9-6333-01	0.0115898	4.18	1
PRAD	TCGA-G9-6336-01	0.00635569	0.000515	1
PRAD	TCGA-G9-6338-01	0.0185063	10.6	2
PRAD	TCGA-G9-6339-01	0.0205625	3.31	1
PRAD	TCGA-G9-6342-01	0.0265444	4.88	2
PRAD	TCGA-G9-6343-01	0.0100943	0.291	2
PRAD	TCGA-G9-6347-01	0.00448637	0.00578	3
PRAD	TCGA-G9-6348-01	0.0190671	0.0157	2
PRAD	TCGA-G9-6351-01	0.0205625	0.00661	2
PRAD	TCGA-G9-6353-01	0.000747728	0.00188	2
PRAD	TCGA-G9-6354-01	0.011029	2.18	1
PRAD	TCGA-G9-6356-01	0.00766422	0.131	5
PRAD	TCGA-G9-6361-01	0.0151415	4.6	2
PRAD	TCGA-G9-6362-01	0.0127114	7.4	4
PRAD	TCGA-G9-6363-01	0.0130852	8.09	2
PRAD	TCGA-G9-6364-01	0.0102813	3.45	1
PRAD	TCGA-G9-6365-01	0.00897274	1.34	3
PRAD	TCGA-G9-6366-01	0.0128983	10.9	4
PRAD	TCGA-G9-6367-01	0.000560796	0.000817	1
PRAD	TCGA-G9-6369-01	0.0132722	8.13	2
PRAD	TCGA-G9-6370-01	0.000186932	0.00169	1
PRAD	TCGA-G9-6371-01	0.00822501	0.0455	1
PRAD	TCGA-G9-6373-01	0.0132722	14.5	1
PRAD	TCGA-G9-6377-01	0.0211233	6.74	1
PRAD	TCGA-G9-6378-01	0.0128983	0.00691	1
PRAD	TCGA-G9-6379-01	0.0102813	0.161	2
PRAD	TCGA-G9-6384-01	0.00822501	5.45	1
PRAD	TCGA-G9-6385-01	0.00243012	0.00434	1
PRAD	TCGA-G9-6494-01	0.0145807	9.11	2
PRAD	TCGA-G9-6496-01	0.0198148	8.31	1
PRAD	TCGA-G9-6498-01	0.0123375	1.03	1
PRAD	TCGA-G9-6499-01	0.0181324	19.8	1
PRAD	TCGA-G9-7510-01	0.011029	1.59	3
PRAD	TCGA-G9-7519-01	0.00878581	0.161	1
PRAD	TCGA-G9-7521-01	0.0115898	16.2	4
PRAD	TCGA-G9-7522-01	0.00317785	0.0279	2
PRAD	TCGA-G9-7523-01	0.0052341	0.0265	1
PRAD	TCGA-G9-7525-01	0.0134591	4.4	1
PRAD	TCGA-H9-7775-01	0.0106551	2.78	1
PRAD	TCGA-H9-A6BX-01	0.00186932	0.00173	1
PRAD	TCGA-H9-A6BY-01	0.0099074	1.8	4
PRAD	TCGA-HC-7075-01	0.013833	0.549	1
PRAD	TCGA-HC-7077-01	0.0213103	4.35	1
PRAD	TCGA-HC-7078-01	0.0147676	21.3	2
PRAD	TCGA-HC-7079-01	0.00112159	0.00674	1
PRAD	TCGA-HC-7080-01	0.0158892	14.4	2
PRAD	TCGA-HC-7081-01	0.024862	2.49	2
PRAD	TCGA-HC-7209-01	0.00915967	3.98	2
PRAD	TCGA-HC-7210-01	0.0216841	7.39	1
PRAD	TCGA-HC-7211-01	0.00915967	4.61	2
PRAD	TCGA-HC-7212-01	0.00859888	5.77	3
PRAD	TCGA-HC-7213-01	0.0162631	17.4	4
PRAD	TCGA-HC-7230-01	0.00953354	5.02	5
PRAD	TCGA-HC-7231-01	0.00915967	2.96	2
PRAD	TCGA-HC-7232-01	0.0100943	10.8	3
PRAD	TCGA-HC-7233-01	0.0170108	0.0866	1
PRAD	TCGA-HC-7736-01	0.00598183	11.3	1
PRAD	TCGA-HC-7737-01	0.00598183	0.00625	3
PRAD	TCGA-HC-7738-01	0.0145807	2.59	1
PRAD	TCGA-HC-7740-01	0.035704	0.0187	3
PRAD	TCGA-HC-7742-01	0.0106551	11.2	4
PRAD	TCGA-HC-7744-01	0.0128983	1.64	3
PRAD	TCGA-HC-7745-01	0.0125245	5.46	1
PRAD	TCGA-HC-7747-01	0.00616876	0.00508	2
PRAD	TCGA-HC-7748-01	0.00841195	3.69	2
PRAD	TCGA-HC-7749-01	0.019254	3.09	1
PRAD	TCGA-HC-7750-01	0.00710342	0.62	1
PRAD	TCGA-HC-7752-01	0.0132722	1.42	2
PRAD	TCGA-HC-7817-01	0.00654262	0.0504	1
PRAD	TCGA-HC-7818-01	0.00411251	0.00267	1
PRAD	TCGA-HC-7819-01	0.00803808	5.99	1
PRAD	TCGA-HC-7820-01	0.0115898	3.7	2
PRAD	TCGA-HC-7821-01	0.00915967	12.9	1
PRAD	TCGA-HC-8213-01	0.00635569	0.781	1
PRAD	TCGA-HC-8216-01	0.0332739	8.73	4
PRAD	TCGA-HC-8256-01	0.0119637	4.58	4
PRAD	TCGA-HC-8257-01	0.0162631	6.58	2
PRAD	TCGA-HC-8258-01	0.0265444	0.363	4
PRAD	TCGA-HC-8259-01	0.0130852	0.316	2
PRAD	TCGA-HC-8260-01	0.00429944	0.0237	2
PRAD	TCGA-HC-8261-01	0.0188801	4.9	3
PRAD	TCGA-HC-8262-01	0.0188801	4.18	1
PRAD	TCGA-HC-8264-01	0.0170108	6.27	2
PRAD	TCGA-HC-8265-01	0.0611268	5.91	10
PRAD	TCGA-HC-8266-01	0.00878581	3.58	4
PRAD	TCGA-HC-A48F-01	0.0115898	40.4	2
PRAD	TCGA-HC-A4ZV-01	0.0760814	28.9	3
PRAD	TCGA-HC-A631-01	0.0170108	18	3
PRAD	TCGA-HC-A632-01	0.0149546	16.2	2
PRAD	TCGA-HC-A6AL-01	0.0252358	5.27	3
PRAD	TCGA-HC-A6AN-01	0.0171978	7.04	3
PRAD	TCGA-HC-A6AO-01	0.0140199	9.97	4
PRAD	TCGA-HC-A6AP-01	0.0115898	5.44	6
PRAD	TCGA-HC-A6AQ-01	0.0100943	0.0448	2
PRAD	TCGA-HC-A6AS-01	0.00729035	0.467	1
PRAD	TCGA-HC-A6HX-01	0.00710342	0.615	2
PRAD	TCGA-HC-A6HY-01	0.0128983	3.83	1
PRAD	TCGA-HC-A76W-01	0.01645	1.67	2
PRAD	TCGA-HC-A76X-01	0.0130852	0.384	1
PRAD	TCGA-HI-7168-01	0.0196279	32.2	1
PRAD	TCGA-HI-7169-01	0.0132722	0.0836	1
PRAD	TCGA-HI-7170-01	0.0112159	4.12	1
PRAD	TCGA-HI-7171-01	0.0125245	14.9	3
PRAD	TCGA-J4-8198-01	0.0149546	7.09	2
PRAD	TCGA-J4-8200-01	0.00729035	3.05	3
PRAD	TCGA-J4-A67K-01	0.0134591	0.587	1
PRAD	TCGA-J4-A67L-01	0.0127114	5.67	2
PRAD	TCGA-J4-A67M-01	0.0115898	3.49	1
PRAD	TCGA-J4-A67N-01	0.0099074	9.14	2
PRAD	TCGA-J4-A67O-01	0.00766422	0.0113	1
PRAD	TCGA-J4-A67Q-01	0.00859888	0.0155	2
PRAD	TCGA-J4-A67R-01	0.00486023	0.0042	2
PRAD	TCGA-J4-A67S-01	0.00672956	5.62	2
PRAD	TCGA-J4-A67T-01	0.00486023	0.525	3
PRAD	TCGA-J4-A6G1-01	0.00168239	0.0378	2
PRAD	TCGA-J4-A6G3-01	0.00654262	0.00542	2
PRAD	TCGA-J4-A6M7-01	0.00710342	0.337	1
PRAD	TCGA-J4-A83K-01	0.00803808	0.0481	2
PRAD	TCGA-J4-A83L-01	0.00672956	0.161	1
PRAD	TCGA-J4-A83M-01	0.0125245	0.954	1
PRAD	TCGA-J4-A83N-01	0.00747728	3.2	1
PRAD	TCGA-J9-A52B-01	0.013646	5.76	7
PRAD	TCGA-J9-A52C-01	0.15721	0.0589	4
PRAD	TCGA-J9-A52E-01	0.0130852	19.4	3
PRAD	TCGA-J9-A8CK-01	0.00766422	4.91	3
PRAD	TCGA-J9-A8CL-01	0.0284137	24.1	1
PRAD	TCGA-J9-A8CM-01	0.0394427	14.5	2
PRAD	TCGA-J9-A8CN-01	0.0057949	5.99	1
PRAD	TCGA-J9-A8CP-01	0.0157023	11.9	2
PRAD	TCGA-KC-A4BL-01	0.00336478	0.000785	2
PRAD	TCGA-KC-A4BN-01	0.00542103	0.00408	2
PRAD	TCGA-KC-A4BR-01	0.00112159	0.00104	1
PRAD	TCGA-KC-A4BV-01	0.0160762	12.4	3
PRAD	TCGA-KC-A7F3-01	0.0158892	4.75	1
PRAD	TCGA-KC-A7F5-01	0.0162631	8.31	2
PRAD	TCGA-KC-A7F6-01	0.011029	6	1
PRAD	TCGA-KC-A7FA-01	0.0181324	6.79	3
PRAD	TCGA-KC-A7FD-01	0.0185063	1.42	1
PRAD	TCGA-KC-A7FE-01	0.00317785	0.00121	2
PRAD	TCGA-KK-A59V-01	0.234413	2.55	9
PRAD	TCGA-KK-A59X-01	0.0280398	14.5	3
PRAD	TCGA-KK-A59Y-01	0.00766422	10.5	2
PRAD	TCGA-KK-A59Z-01	0.0243012	36.2	4
PRAD	TCGA-KK-A6DY-01	0.0115898	9.22	2
PRAD	TCGA-KK-A6E0-01	0.0155154	13.7	4
PRAD	TCGA-KK-A6E1-01	0.0121506	22.2	3
PRAD	TCGA-KK-A6E2-01	0.0130852	1.43	3
PRAD	TCGA-KK-A6E3-01	0.00785115	0.0322	1
PRAD	TCGA-KK-A6E4-01	0.0149546	4.01	1
PRAD	TCGA-KK-A6E5-01	0.00710342	5.54	1
PRAD	TCGA-KK-A6E6-01	0.0179455	3.47	3
PRAD	TCGA-KK-A6E7-01	0.0162631	4.63	2
PRAD	TCGA-KK-A6E8-01	0.0218711	23.2	3
PRAD	TCGA-KK-A7AP-01	0.01645	17	1
PRAD	TCGA-KK-A7AQ-01	0.0153284	11.3	3
PRAD	TCGA-KK-A7AU-01	0.00616876	11.2	5
PRAD	TCGA-KK-A7AV-01	0.00598183	1.16	2
PRAD	TCGA-KK-A7AW-01	0.0149546	4.37	1
PRAD	TCGA-KK-A7AY-01	0.0198148	6.07	1
PRAD	TCGA-KK-A7AZ-01	0.0162631	10.6	1
PRAD	TCGA-KK-A7B0-01	0.0149546	5.06	5
PRAD	TCGA-KK-A7B1-01	0.00897274	2.45	1
PRAD	TCGA-KK-A7B2-01	0.00429944	0.00208	1
PRAD	TCGA-KK-A7B3-01	0.01645	7.79	2
PRAD	TCGA-KK-A7B4-01	0.0130852	20.9	2
PRAD	TCGA-KK-A8IJ-01	0.0121506	3.17	1
PRAD	TCGA-M7-A71Y-01	0.00448637	0.205	1
PRAD	TCGA-M7-A71Z-01	0.0119637	4.61	2
PRAD	TCGA-M7-A720-01	0.00205625	0.00223	3
PRAD	TCGA-M7-A721-01	0.00897274	2.4	1
PRAD	TCGA-M7-A723-01	0.000747728	0.0186	2
PRAD	TCGA-M7-A724-01	0.0151415	12.4	2
PRAD	TCGA-M7-A725-01	0.0130852	15.4	1
PRAD	TCGA-QU-A6IL-01	0.0194409	10.5	3
PRAD	TCGA-QU-A6IM-01	0.0422467	7.96	3
PRAD	TCGA-QU-A6IN-01	0.0108421	3.33	1
PRAD	TCGA-QU-A6IO-01	0.0151415	3.22	1
PRAD	TCGA-QU-A6IP-01	0.00747728	0.198	2
PRAD	TCGA-SU-A7E7-01	0.00841195	0.0155	3
PRAD	TCGA-VN-A88I-01	0.00317785	0.0762	1
PRAD	TCGA-VN-A88K-01	0.0143938	12.8	2
PRAD	TCGA-VN-A88L-01	0.00841195	3.53	1
PRAD	TCGA-VN-A88M-01	0.00486023	3.95	1
PRAD	TCGA-VN-A88O-01	0.0117767	0.941	2
PRAD	TCGA-VN-A88P-01	0.0209364	7.1	1
PRAD	TCGA-VN-A88Q-01	0.016637	6.62	3
PRAD	TCGA-VP-A872-01	0.00915967	12.8	4
PRAD	TCGA-VP-A875-01	0.0127114	14.9	1
PRAD	TCGA-VP-A876-01	0.00859888	6.01	5
PRAD	TCGA-VP-A878-01	0.0177586	4.87	4
PRAD	TCGA-VP-A879-01	0.0151415	0.741	2
PRAD	TCGA-VP-A87B-01	0.0177586	12.1	5
PRAD	TCGA-VP-A87C-01	0.00841195	0.465	1
PRAD	TCGA-VP-A87D-01	0.0198148	9.33	3
PRAD	TCGA-VP-A87E-01	0.00542103	0.00398	1
PRAD	TCGA-VP-A87H-01	0.00822501	29	1
PRAD	TCGA-VP-A87J-01	0.0115898	5.91	7
PRAD	TCGA-VP-A87K-01	0.0151415	8.93	1
PRAD	TCGA-XJ-A83F-01	0.0128983	7.81	2
PRAD	TCGA-XJ-A83G-01	0.00785115	8.13	2
PRAD	TCGA-XJ-A83H-01	0.00841195	3.49	1
BRCA	TCGA-3C-AAAU-01	0.0114029	48.1	1
BRCA	TCGA-3C-AALI-01	0.320589	66.4	2
BRCA	TCGA-3C-AALJ-01	0.0179455	27.7	3
BRCA	TCGA-3C-AALK-01	0.0200017	8.65	1
BRCA	TCGA-4H-AAAK-01	0.0108421	14.1	1
BRCA	TCGA-5L-AAT0-01	0.0932791	6.48	1
BRCA	TCGA-5L-AAT1-01	0.743803	6.36	2
BRCA	TCGA-5T-A9QA-01	0.0231796	38.7	1
BRCA	TCGA-A1-A0SB-01	NA	0.0753	1
BRCA	TCGA-A1-A0SD-01	0.0143938	23.1	4
BRCA	TCGA-A1-A0SE-01	0.016637	19.1	2
BRCA	TCGA-A1-A0SF-01	0.0194409	32.4	4
BRCA	TCGA-A1-A0SG-01	0.0147676	8.59	5
BRCA	TCGA-A1-A0SH-01	0.06337	17.3	7
BRCA	TCGA-A1-A0SI-01	0.124684	13.8	5
BRCA	TCGA-A1-A0SJ-01	0.0179455	49.2	2
BRCA	TCGA-A1-A0SK-01	0.0364518	41	3
BRCA	TCGA-A1-A0SM-01	0.0134591	16.9	2
BRCA	TCGA-A1-A0SN-01	0.0299091	25.3	2
BRCA	TCGA-A1-A0SO-01	0.151976	68.2	4
BRCA	TCGA-A1-A0SP-01	0.024675	38.5	4
BRCA	TCGA-A1-A0SQ-01	0.0143938	11.2	5
BRCA	TCGA-A2-A04N-01	0.0194409	7.49	4
BRCA	TCGA-A2-A04P-01	0.0796331	59	3
BRCA	TCGA-A2-A04Q-01	0.0162631	7.61	5
BRCA	TCGA-A2-A04R-01	0.0566404	24.7	1
BRCA	TCGA-A2-A04T-01	0.0562666	64.9	5
BRCA	TCGA-A2-A04U-01	0.027666	57.3	3
BRCA	TCGA-A2-A04V-01	0.0158892	10.6	1
BRCA	TCGA-A2-A04W-01	0.0678564	4.76	4
BRCA	TCGA-A2-A04X-01	0.0188801	22.9	2
BRCA	TCGA-A2-A04Y-01	0.0228057	13.9	2
BRCA	TCGA-A2-A0CK-01	0.00897274	7.62	5
BRCA	TCGA-A2-A0CL-01	0.0381342	5.24	2
BRCA	TCGA-A2-A0CM-01	0.0362648	23.8	1
BRCA	TCGA-A2-A0CO-01	0.0119637	13.4	2
BRCA	TCGA-A2-A0CP-01	0.0371995	8.12	3
BRCA	TCGA-A2-A0CQ-01	0.0214972	12	3
BRCA	TCGA-A2-A0CR-01	0.0616876	0.0139	5
BRCA	TCGA-A2-A0CS-01	0.0228057	22.5	2
BRCA	TCGA-A2-A0CT-01	0.043929	44.7	2
BRCA	TCGA-A2-A0CU-01	0.0201887	41.1	1
BRCA	TCGA-A2-A0CV-01	0.00953354	31.2	4
BRCA	TCGA-A2-A0CW-01	0.0334608	29.4	6
BRCA	TCGA-A2-A0CX-01	0.134965	26.5	6
BRCA	TCGA-A2-A0CZ-01	NA	2.59	1
BRCA	TCGA-A2-A0D0-01	0.0465461	51.8	6
BRCA	TCGA-A2-A0D1-01	0.0323393	24.3	7
BRCA	TCGA-A2-A0D2-01	0.055145	25.4	2
BRCA	TCGA-A2-A0D3-01	0.0143938	10.2	2
BRCA	TCGA-A2-A0D4-01	0.0190671	46.2	4
BRCA	TCGA-A2-A0EM-01	0.0151415	9.65	2
BRCA	TCGA-A2-A0EN-01	0.0147676	13.4	2
BRCA	TCGA-A2-A0EO-01	0.0185063	23.3	2
BRCA	TCGA-A2-A0EP-01	0.00317785	0.00144	1
BRCA	TCGA-A2-A0EQ-01	0.0942138	19.5	3
BRCA	TCGA-A2-A0ER-01	0.0143938	7.08	2
BRCA	TCGA-A2-A0ES-01	0.00392557	0.666	1
BRCA	TCGA-A2-A0ET-01	0.0213103	45.6	2
BRCA	TCGA-A2-A0EU-01	0.0188801	34.6	1
BRCA	TCGA-A2-A0EV-01	0.0321523	20.4	2
BRCA	TCGA-A2-A0EW-01	0.00822501	6.62	2
BRCA	TCGA-A2-A0EX-01	0.013833	9.29	2
BRCA	TCGA-A2-A0EY-01	0.129357	56.6	7
BRCA	TCGA-A2-A0ST-01	0.00691649	1.07	3
BRCA	TCGA-A2-A0SU-01	0.0140199	11	3
BRCA	TCGA-A2-A0SV-01	0.0218711	31.9	3
BRCA	TCGA-A2-A0SW-01	0.0323393	40.9	4
BRCA	TCGA-A2-A0SX-01	0.0168239	23.4	3
BRCA	TCGA-A2-A0SY-01	0.0867365	9.22	7
BRCA	TCGA-A2-A0T0-01	0.109729	39.7	7
BRCA	TCGA-A2-A0T1-01	0.00915967	7.38	2
BRCA	TCGA-A2-A0T2-01	0.01645	86.6	3
BRCA	TCGA-A2-A0T3-01	0.0209364	48.3	7
BRCA	TCGA-A2-A0T4-01	0.0194409	21	4
BRCA	TCGA-A2-A0T5-01	0.00729035	10.2	16
BRCA	TCGA-A2-A0T6-01	0.011029	11.2	3
BRCA	TCGA-A2-A0T7-01	0.00616876	21.6	4
BRCA	TCGA-A2-A0YC-01	0.0102813	10.5	1
BRCA	TCGA-A2-A0YD-01	0.0353302	8.7	2
BRCA	TCGA-A2-A0YE-01	0.0203756	41.5	2
BRCA	TCGA-A2-A0YF-01	0.0147676	12.7	1
BRCA	TCGA-A2-A0YG-01	0.0321523	30.8	3
BRCA	TCGA-A2-A0YH-01	0.0414989	14.2	3
BRCA	TCGA-A2-A0YI-01	0.00785115	15	1
BRCA	TCGA-A2-A0YJ-01	0.0321523	41.4	2
BRCA	TCGA-A2-A0YK-01	0.163005	4.52	5
BRCA	TCGA-A2-A0YL-01	0.0128983	4.47	1
BRCA	TCGA-A2-A0YM-01	0.0418728	39	5
BRCA	TCGA-A2-A0YT-01	0.0287875	34.2	2
BRCA	TCGA-A2-A1FV-01	0.0190671	37.3	4
BRCA	TCGA-A2-A1FW-01	0.0390688	22.6	3
BRCA	TCGA-A2-A1FX-01	0.0127114	36.6	1
BRCA	TCGA-A2-A1FZ-01	0.0108421	9.37	1
BRCA	TCGA-A2-A1G0-01	0.0128983	19.6	4
BRCA	TCGA-A2-A1G1-01	0.0181324	12.3	3
BRCA	TCGA-A2-A1G4-01	0.0203756	14.2	3
BRCA	TCGA-A2-A1G6-01	0.00280398	0.00908	1
BRCA	TCGA-A2-A259-01	0.0115898	8.84	2
BRCA	TCGA-A2-A25A-01	0.131413	3.22	3
BRCA	TCGA-A2-A25B-01	0.0564535	38.8	3
BRCA	TCGA-A2-A25C-01	0.0175716	30.3	2
BRCA	TCGA-A2-A25D-01	0.0355171	21.5	3
BRCA	TCGA-A2-A25E-01	0.0379472	32	1
BRCA	TCGA-A2-A25F-01	0.00317785	0.276	1
BRCA	TCGA-A2-A3KC-01	0.0102813	13.8	5
BRCA	TCGA-A2-A3KD-01	0.00635569	18.7	2
BRCA	TCGA-A2-A3XS-01	0.0117767	45	2
BRCA	TCGA-A2-A3XT-01	0.0472938	44.6	3
BRCA	TCGA-A2-A3XU-01	0.0102813	28.9	1
BRCA	TCGA-A2-A3XV-01	0.0201887	11.5	1
BRCA	TCGA-A2-A3XW-01	0.00205625	0.236	1
BRCA	TCGA-A2-A3XX-01	0.0181324	20	2
BRCA	TCGA-A2-A3XY-01	0.0200017	10.3	2
BRCA	TCGA-A2-A3XZ-01	0.0196279	6.96	6
BRCA	TCGA-A2-A3Y0-01	0.101878	24.1	8
BRCA	TCGA-A2-A4RW-01	0.0704734	29.7	3
BRCA	TCGA-A2-A4RX-01	0.00729035	35	4
BRCA	TCGA-A2-A4RY-01	0.00355171	0.368	3
BRCA	TCGA-A2-A4S0-01	0.00598183	0.00514	1
BRCA	TCGA-A2-A4S1-01	0.035891	18	2
BRCA	TCGA-A2-A4S2-01	0.0162631	30.4	5
BRCA	TCGA-A2-A4S3-01	0.0394427	28	4
BRCA	TCGA-A7-A0CD-01	0.0158892	51.1	3
BRCA	TCGA-A7-A0CE-01	0.0693518	39.5	2
BRCA	TCGA-A7-A0CG-01	0.0196279	7.99	2
BRCA	TCGA-A7-A0CH-01	NA	5.8	4
BRCA	TCGA-A7-A0CJ-01	0.0315915	58.8	4
BRCA	TCGA-A7-A0D9-01	0.0143938	17.5	3
BRCA	TCGA-A7-A0DA-01	0.0869234	44.8	5
BRCA	TCGA-A7-A0DB-01	0.349563	30.6	4
BRCA	TCGA-A7-A13D-01	0.172725	37.6	4
BRCA	TCGA-A7-A13E-01	0.337973	59.5	4
BRCA	TCGA-A7-A13F-01	0.0171978	24.9	1
BRCA	TCGA-A7-A13G-01	0.114963	10.9	11
BRCA	TCGA-A7-A13H-01	0.00598183	11.2	1
BRCA	TCGA-A7-A26E-01	0.0676694	9.94	6
BRCA	TCGA-A7-A26F-01	0.159266	11.7	8
BRCA	TCGA-A7-A26G-01	0.0332739	14.2	7
BRCA	TCGA-A7-A26H-01	0.0603791	20.1	3
BRCA	TCGA-A7-A26I-01	0.0465461	32.3	3
BRCA	TCGA-A7-A26J-01	0.0400035	36.8	9
BRCA	TCGA-A7-A2KD-01	0.0188801	26.3	3
BRCA	TCGA-A7-A3IY-01	0.0099074	0.0358	1
BRCA	TCGA-A7-A3IZ-01	0.035891	15.3	2
BRCA	TCGA-A7-A3J0-01	0.00859888	18.8	1
BRCA	TCGA-A7-A3J1-01	0.011029	17.5	3
BRCA	TCGA-A7-A3RF-01	0.0196279	0.216	2
BRCA	TCGA-A7-A425-01	0.0121506	11.4	3
BRCA	TCGA-A7-A426-01	0.00822501	15.9	1
BRCA	TCGA-A7-A4SA-01	0.0373864	24.6	4
BRCA	TCGA-A7-A4SB-01	0.0198148	47.8	6
BRCA	TCGA-A7-A4SC-01	0.0140199	6.39	2
BRCA	TCGA-A7-A4SD-01	0.0224319	27.9	1
BRCA	TCGA-A7-A4SE-01	0.0566404	65	5
BRCA	TCGA-A7-A4SF-01	0.0403773	47.9	5
BRCA	TCGA-A7-A56D-01	0.0680433	37.4	4
BRCA	TCGA-A7-A5ZV-01	NA	55.3	5
BRCA	TCGA-A7-A5ZW-01	0.0115898	4.57	3
BRCA	TCGA-A7-A5ZX-01	0.0145807	5.45	3
BRCA	TCGA-A7-A6VV-01	0.0237404	26.1	1
BRCA	TCGA-A7-A6VW-01	0.0351432	57.6	2
BRCA	TCGA-A7-A6VX-01	0.0859888	50.5	1
BRCA	TCGA-A7-A6VY-01	0.0603791	19.8	1
BRCA	TCGA-A8-A06N-01	NA	53.4	3
BRCA	TCGA-A8-A06O-01	0.0291614	35.4	8
BRCA	TCGA-A8-A06P-01	0.0209364	8.91	3
BRCA	TCGA-A8-A06Q-01	0.134965	60	6
BRCA	TCGA-A8-A06R-01	0.0351432	49.9	5
BRCA	TCGA-A8-A06T-01	0.01645	71.2	6
BRCA	TCGA-A8-A06U-01	0.030283	44.1	5
BRCA	TCGA-A8-A06X-01	0.121132	55	6
BRCA	TCGA-A8-A06Y-01	0.0175716	23.7	4
BRCA	TCGA-A8-A06Z-01	0.041312	63.9	1
BRCA	TCGA-A8-A075-01	0.0493501	64.7	8
BRCA	TCGA-A8-A076-01	0.0323393	38.2	4
BRCA	TCGA-A8-A079-01	0.0345824	32.6	5
BRCA	TCGA-A8-A07B-01	0.0418728	25.1	5
BRCA	TCGA-A8-A07C-01	NA	41.2	3
BRCA	TCGA-A8-A07E-01	NA	18.7	4
BRCA	TCGA-A8-A07F-01	0.0155154	56.8	3
BRCA	TCGA-A8-A07G-01	0.0291614	24.8	2
BRCA	TCGA-A8-A07I-01	0.0228057	22.8	6
BRCA	TCGA-A8-A07J-01	0.0271052	15.1	2
BRCA	TCGA-A8-A07L-01	0.0594444	40.7	4
BRCA	TCGA-A8-A07O-01	0.0229926	29.1	4
BRCA	TCGA-A8-A07P-01	0.0269182	24.4	1
BRCA	TCGA-A8-A07R-01	0.157771	37.4	4
BRCA	TCGA-A8-A07U-01	0.0300961	5.01	1
BRCA	TCGA-A8-A07W-01	0.0560796	37	6
BRCA	TCGA-A8-A07Z-01	0.0108421	26	3
BRCA	TCGA-A8-A081-01	0.0482285	32.9	3
BRCA	TCGA-A8-A082-01	0.0114029	11.7	6
BRCA	TCGA-A8-A083-01	0.0205625	18	2
BRCA	TCGA-A8-A084-01	NA	17.5	4
BRCA	TCGA-A8-A085-01	0.04692	22.5	4
BRCA	TCGA-A8-A086-01	NA	26.1	4
BRCA	TCGA-A8-A08A-01	NA	7.98	2
BRCA	TCGA-A8-A08B-01	0.0190671	41.7	9
BRCA	TCGA-A8-A08C-01	0.000934661	34.1	1
BRCA	TCGA-A8-A08F-01	0.0760814	58.5	3
BRCA	TCGA-A8-A08G-01	0.0218711	47.7	3
BRCA	TCGA-A8-A08H-01	0.0734643	0.0468	1
BRCA	TCGA-A8-A08I-01	NA	42.8	3
BRCA	TCGA-A8-A08J-01	0.0168239	41.2	3
BRCA	TCGA-A8-A08L-01	0.14319	51.3	9
BRCA	TCGA-A8-A08O-01	0.0147676	60.8	4
BRCA	TCGA-A8-A08P-01	0.0304699	29.2	5
BRCA	TCGA-A8-A08R-01	0.128983	39.6	8
BRCA	TCGA-A8-A08S-01	0.0269182	34.2	5
BRCA	TCGA-A8-A08T-01	0.0263574	19.5	6
BRCA	TCGA-A8-A08X-01	0.0134591	22.5	2
BRCA	TCGA-A8-A08Z-01	0.019254	10.7	2
BRCA	TCGA-A8-A090-01	0.0171978	26.4	3
BRCA	TCGA-A8-A091-01	0.00710342	29.9	4
BRCA	TCGA-A8-A092-01	0.0457984	50.7	5
BRCA	TCGA-A8-A093-01	0.0564535	41.8	5
BRCA	TCGA-A8-A094-01	0.117206	26.8	8
BRCA	TCGA-A8-A095-01	0.0822501	4.18	4
BRCA	TCGA-A8-A096-01	0.0170108	6.41	1
BRCA	TCGA-A8-A097-01	0.0643046	36.4	7
BRCA	TCGA-A8-A099-01	0.0121506	17.7	1
BRCA	TCGA-A8-A09A-01	0.0944007	23.3	5
BRCA	TCGA-A8-A09B-01	0.0207495	31	4
BRCA	TCGA-A8-A09C-01	0.0185063	46.2	2
BRCA	TCGA-A8-A09D-01	0.0214972	21.8	6
BRCA	TCGA-A8-A09E-01	0.033087	46.3	5
BRCA	TCGA-A8-A09G-01	0.157958	21.6	10
BRCA	TCGA-A8-A09I-01	0.0691649	28	4
BRCA	TCGA-A8-A09K-01	0.0222449	49.3	2
BRCA	TCGA-A8-A09M-01	0.0695387	35.5	3
BRCA	TCGA-A8-A09N-01	0.0626223	70.7	2
BRCA	TCGA-A8-A09Q-01	0.0676694	37	6
BRCA	TCGA-A8-A09R-01	NA	44.8	3
BRCA	TCGA-A8-A09T-01	0.013646	8.7	5
BRCA	TCGA-A8-A09V-01	0.0123375	7.47	4
BRCA	TCGA-A8-A09W-01	0.0487893	35.9	4
BRCA	TCGA-A8-A09X-01	0.0306569	8.39	3
BRCA	TCGA-A8-A09Z-01	0.659683	11.4	19
BRCA	TCGA-A8-A0A1-01	0.0158892	11	2
BRCA	TCGA-A8-A0A2-01	0.0185063	23.1	3
BRCA	TCGA-A8-A0A4-01	0.0190671	24.2	2
BRCA	TCGA-A8-A0A7-01	0.0902882	6.65	3
BRCA	TCGA-A8-A0A9-01	0.0265444	35.8	6
BRCA	TCGA-A8-A0AB-01	0.0142068	23.3	1
BRCA	TCGA-A8-A0AD-01	0.0188801	15.6	3
BRCA	TCGA-AC-A23C-01	0.0628092	15.7	4
BRCA	TCGA-AC-A23E-01	0.00803808	12.2	2
BRCA	TCGA-AC-A23G-01	0.0151415	5.19	2
BRCA	TCGA-AC-A2B8-01	0.0570143	10.2	3
BRCA	TCGA-AC-A2BK-01	0.0428075	45.4	4
BRCA	TCGA-AC-A2BM-01	0.0099074	37	3
BRCA	TCGA-AC-A2FB-01	0.00392557	0.256	1
BRCA	TCGA-AC-A2FE-01	0.0117767	14.2	1
BRCA	TCGA-AC-A2FF-01	0.00448637	0.108	3
BRCA	TCGA-AC-A2FG-01	0.0186932	7.29	2
BRCA	TCGA-AC-A2FK-01	0	0.00426	2
BRCA	TCGA-AC-A2FM-01	0.0160762	44.9	6
BRCA	TCGA-AC-A2FO-01	0.013646	4.71	3
BRCA	TCGA-AC-A2QH-01	0.550889	0.666	7
BRCA	TCGA-AC-A2QI-01	0.043929	9.63	4
BRCA	TCGA-AC-A2QJ-01	0.00168239	14	2
BRCA	TCGA-AC-A3BB-01	0.030283	5.17	2
BRCA	TCGA-AC-A3EH-01	0.0207495	16.6	2
BRCA	TCGA-AC-A3HN-01	0.0104682	13.7	1
BRCA	TCGA-AC-A3OD-01	0.205625	6.43	8
BRCA	TCGA-AC-A3QP-01	0.0171978	6.76	1
BRCA	TCGA-AC-A3QQ-01	0.0792592	11.8	2
BRCA	TCGA-AC-A3TM-01	0.0125245	11.2	3
BRCA	TCGA-AC-A3TN-01	0.0121506	6.76	3
BRCA	TCGA-AC-A3W5-01	0.0773899	32.7	2
BRCA	TCGA-AC-A3W6-01	0.0843064	4.14	6
BRCA	TCGA-AC-A3W7-01	0.0373864	13.6	2
BRCA	TCGA-AC-A3YI-01	0.00486023	2.41	3
BRCA	TCGA-AC-A3YJ-01	0.0114029	4.17	4
BRCA	TCGA-AC-A4ZE-01	0.024862	12.8	1
BRCA	TCGA-AC-A5EH-01	0.0818763	19	3
BRCA	TCGA-AC-A5XS-01	0.294418	20.3	10
BRCA	TCGA-AC-A5XU-01	0.024675	44.2	3
BRCA	TCGA-AC-A62V-01	0.0388819	43.2	1
BRCA	TCGA-AC-A62X-01	0.0224319	47.6	4
BRCA	TCGA-AC-A62Y-01	0.0340216	48	4
BRCA	TCGA-AC-A6IW-01	0.077016	13.8	1
BRCA	TCGA-AC-A6IX-01	0.0272921	18.6	2
BRCA	TCGA-AC-A6IX-06	0.019254	4.81	2
BRCA	TCGA-AC-A6NO-01	0.0143938	13.8	1
BRCA	TCGA-AC-A7VB-01	0.011029	23.5	4
BRCA	TCGA-AC-A7VC-01	0.00878581	16.2	1
BRCA	TCGA-AC-A8OP-01	0.0755206	25.1	1
BRCA	TCGA-AC-A8OQ-01	0.0306569	17.2	1
BRCA	TCGA-AC-A8OR-01	0.0196279	3.08	2
BRCA	TCGA-AN-A03X-01	0.0229926	28.3	3
BRCA	TCGA-AN-A03Y-01	0.01645	37.8	6
BRCA	TCGA-AN-A041-01	0.0149546	26.1	2
BRCA	TCGA-AN-A049-01	0.0143938	35.6	2
BRCA	TCGA-AN-A04A-01	0.0171978	35.4	1
BRCA	TCGA-AN-A04C-01	0.0375734	32.7	2
BRCA	TCGA-AN-A04D-01	0.0611268	33.7	3
BRCA	TCGA-AN-A0AJ-01	0.0400035	56.6	9
BRCA	TCGA-AN-A0AK-01	0.56304	15.4	17
BRCA	TCGA-AN-A0AL-01	0.0476677	41.6	3
BRCA	TCGA-AN-A0AM-01	0.0373864	17.6	3
BRCA	TCGA-AN-A0AR-01	0.0697257	51.8	3
BRCA	TCGA-AN-A0AS-01	0.0194409	25.5	3
BRCA	TCGA-AN-A0AT-01	0.0757075	43.9	3
BRCA	TCGA-AN-A0FD-01	0.0214972	15.2	2
BRCA	TCGA-AN-A0FF-01	0.00972047	15	3
BRCA	TCGA-AN-A0FJ-01	0.0540234	56.7	6
BRCA	TCGA-AN-A0FK-01	0.0226188	51.4	1
BRCA	TCGA-AN-A0FL-01	0.109168	49.4	3
BRCA	TCGA-AN-A0FN-01	0.0198148	0.00723	1
BRCA	TCGA-AN-A0FS-01	0.0317785	9.65	2
BRCA	TCGA-AN-A0FT-01	0.0521541	51.1	8
BRCA	TCGA-AN-A0FV-01	0.0508455	18	4
BRCA	TCGA-AN-A0FW-01	0.0635569	19.1	2
BRCA	TCGA-AN-A0FX-01	0.0695387	47.9	3
BRCA	TCGA-AN-A0FY-01	0.0226188	27.4	7
BRCA	TCGA-AN-A0FZ-01	0.0289745	36.8	5
BRCA	TCGA-AN-A0G0-01	0.0183193	30.6	4
BRCA	TCGA-AN-A0XL-01	NA	31.2	3
BRCA	TCGA-AN-A0XN-01	0.0801939	34.9	3
BRCA	TCGA-AN-A0XO-01	0.0186932	20.7	2
BRCA	TCGA-AN-A0XP-01	0.0151415	10.9	1
BRCA	TCGA-AN-A0XR-01	0.0196279	12.2	1
BRCA	TCGA-AN-A0XS-01	0.0140199	7.52	4
BRCA	TCGA-AN-A0XT-01	0.00691649	29.2	2
BRCA	TCGA-AN-A0XU-01	0.0628092	43	4
BRCA	TCGA-AN-A0XV-01	0.0151415	8.11	1
BRCA	TCGA-AN-A0XW-01	0.162818	23.9	6
BRCA	TCGA-AO-A03L-01	0.013646	47.8	4
BRCA	TCGA-AO-A03M-01	NA	15.2	11
BRCA	TCGA-AO-A03N-01	NA	42.3	2
BRCA	TCGA-AO-A03O-01	0.0407512	39.2	3
BRCA	TCGA-AO-A03P-01	0.0257966	23.9	2
BRCA	TCGA-AO-A03R-01	0.0233665	23	2
BRCA	TCGA-AO-A03T-01	0.0499109	25.2	4
BRCA	TCGA-AO-A03U-01	NA	0.0928	2
BRCA	TCGA-AO-A03V-01	0.0319654	29.4	1
BRCA	TCGA-AO-A0J2-01	0.0422467	66.1	2
BRCA	TCGA-AO-A0J3-01	0.041312	44.4	4
BRCA	TCGA-AO-A0J4-01	0.0609399	32.8	4
BRCA	TCGA-AO-A0J5-01	0.0340216	12.1	4
BRCA	TCGA-AO-A0J6-01	0.0667348	42.7	5
BRCA	TCGA-AO-A0J7-01	0.0099074	72	4
BRCA	TCGA-AO-A0J8-01	0.0145807	12.6	1
BRCA	TCGA-AO-A0J9-01	0.0682302	27.1	3
BRCA	TCGA-AO-A0JA-01	0.0196279	29.3	4
BRCA	TCGA-AO-A0JB-01	0.0575751	39.6	2
BRCA	TCGA-AO-A0JC-01	0.0377603	0.00581	1
BRCA	TCGA-AO-A0JD-01	0.0616876	37.4	2
BRCA	TCGA-AO-A0JE-01	0.0216841	30.1	2
BRCA	TCGA-AO-A0JF-01	0.0134591	5.03	3
BRCA	TCGA-AO-A0JG-01	0.00915967	21.2	4
BRCA	TCGA-AO-A0JI-01	0.0099074	23.1	3
BRCA	TCGA-AO-A0JJ-01	0.0106551	13.6	2
BRCA	TCGA-AO-A0JL-01	NA	40.6	1
BRCA	TCGA-AO-A0JM-01	0.0231796	32.4	5
BRCA	TCGA-AO-A124-01	0.088045	35.8	7
BRCA	TCGA-AO-A125-01	NA	10.7	2
BRCA	TCGA-AO-A126-01	NA	14.3	1
BRCA	TCGA-AO-A128-01	0.468452	14.2	14
BRCA	TCGA-AO-A129-01	NA	35.3	4
BRCA	TCGA-AO-A12A-01	0.0052341	6.61	4
BRCA	TCGA-AO-A12B-01	NA	10.4	1
BRCA	TCGA-AO-A12D-01	0.0235534	13.9	2
BRCA	TCGA-AO-A12E-01	NA	37.9	6
BRCA	TCGA-AO-A12F-01	0.0147676	52.3	1
BRCA	TCGA-AO-A12G-01	NA	25.1	3
BRCA	TCGA-AO-A12H-01	0.0108421	0.0128	1
BRCA	TCGA-AO-A1KO-01	0.00243012	0.000548	4
BRCA	TCGA-AO-A1KP-01	0.013646	17.1	3
BRCA	TCGA-AO-A1KQ-01	NA	43.8	1
BRCA	TCGA-AO-A1KR-01	0.038508	18.3	2
BRCA	TCGA-AO-A1KS-01	0.0188801	45.4	2
BRCA	TCGA-AO-A1KT-01	0.0265444	30.8	7
BRCA	TCGA-AQ-A04H-01	0.0373864	39.1	5
BRCA	TCGA-AQ-A04J-01	0.0424336	12.6	1
BRCA	TCGA-AQ-A04L-01	NA	40	4
BRCA	TCGA-AQ-A0Y5-01	0.0250489	19.8	2
BRCA	TCGA-AQ-A1H2-01	0.016637	43.2	1
BRCA	TCGA-AQ-A1H3-01	0.0145807	19.3	1
BRCA	TCGA-AQ-A54N-01	0.0364518	61	4
BRCA	TCGA-AQ-A54O-01	0.0119637	37.4	7
BRCA	TCGA-AQ-A7U7-01	0.0243012	6.71	1
BRCA	TCGA-AR-A0TP-01	0.0400035	48.4	6
BRCA	TCGA-AR-A0TQ-01	0.0171978	7.49	5
BRCA	TCGA-AR-A0TR-01	0.0155154	44.4	3
BRCA	TCGA-AR-A0TS-01	0.0312177	10.5	4
BRCA	TCGA-AR-A0TT-01	0.0297222	19.7	2
BRCA	TCGA-AR-A0TU-01	0.114216	45	1
BRCA	TCGA-AR-A0TV-01	0.038508	35.5	1
BRCA	TCGA-AR-A0TW-01	0.0286006	48.9	4
BRCA	TCGA-AR-A0TX-01	0.182259	16.3	7
BRCA	TCGA-AR-A0TY-01	0.0652393	33.2	4
BRCA	TCGA-AR-A0TZ-01	0.0323393	84.2	4
BRCA	TCGA-AR-A0U0-01	0.174968	20	6
BRCA	TCGA-AR-A0U2-01	0.0515933	27.4	6
BRCA	TCGA-AR-A0U3-01	0.0179455	52.1	5
BRCA	TCGA-AR-A0U4-01	NA	20.2	3
BRCA	TCGA-AR-A1AH-01	0.0601921	83.6	4
BRCA	TCGA-AR-A1AI-01	0.0398165	25.9	3
BRCA	TCGA-AR-A1AJ-01	0.0155154	6.45	3
BRCA	TCGA-AR-A1AK-01	0.0334608	27.1	2
BRCA	TCGA-AR-A1AL-01	0.0140199	8.03	2
BRCA	TCGA-AR-A1AM-01	0.00616876	10.3	2
BRCA	TCGA-AR-A1AN-01	0.0112159	28.1	1
BRCA	TCGA-AR-A1AO-01	0.0293483	0.0517	1
BRCA	TCGA-AR-A1AP-01	0.0235534	28.2	4
BRCA	TCGA-AR-A1AQ-01	0.0218711	12.1	2
BRCA	TCGA-AR-A1AR-01	0.0314046	16.3	2
BRCA	TCGA-AR-A1AS-01	0.0214972	12.8	3
BRCA	TCGA-AR-A1AT-01	0.0160762	NA	1
BRCA	TCGA-AR-A1AU-01	0.0104682	20	1
BRCA	TCGA-AR-A1AV-01	0.0185063	16.6	5
BRCA	TCGA-AR-A1AW-01	0.013833	9.11	3
BRCA	TCGA-AR-A1AX-01	0.00915967	3.53	2
BRCA	TCGA-AR-A1AY-01	0.0370126	51	1
BRCA	TCGA-AR-A24H-01	0.085428	42.6	4
BRCA	TCGA-AR-A24K-01	0.0175716	18.3	7
BRCA	TCGA-AR-A24L-01	0.0269182	24.9	1
BRCA	TCGA-AR-A24M-01	0.00934661	15.7	2
BRCA	TCGA-AR-A24N-01	0.019254	9.66	1
BRCA	TCGA-AR-A24O-01	0.00785115	0.216	1
BRCA	TCGA-AR-A24P-01	0.0099074	15.5	1
BRCA	TCGA-AR-A24Q-01	0.104308	60.2	3
BRCA	TCGA-AR-A24R-01	0.00972047	22.2	2
BRCA	TCGA-AR-A24S-01	0.0229926	30.9	4
BRCA	TCGA-AR-A24T-01	0.00953354	4.43	4
BRCA	TCGA-AR-A24U-01	0.0175716	10.6	1
BRCA	TCGA-AR-A24V-01	0.0140199	22.7	3
BRCA	TCGA-AR-A24W-01	0.0046733	7.12	1
BRCA	TCGA-AR-A24X-01	0.0183193	6.6	4
BRCA	TCGA-AR-A24Z-01	0.0256097	42.4	2
BRCA	TCGA-AR-A250-01	0.0512194	31.5	2
BRCA	TCGA-AR-A251-01	0.104308	34.9	7
BRCA	TCGA-AR-A252-01	0.00429944	1.69	3
BRCA	TCGA-AR-A254-01	0.0173847	18	2
BRCA	TCGA-AR-A255-01	0.0379472	26.1	3
BRCA	TCGA-AR-A256-01	0.124871	57.6	8
BRCA	TCGA-AR-A2LE-01	0.200952	6.56	6
BRCA	TCGA-AR-A2LH-01	0.0153284	7.31e-05	1
BRCA	TCGA-AR-A2LJ-01	0.00504717	9.67	6
BRCA	TCGA-AR-A2LK-01	0.0200017	28.5	1
BRCA	TCGA-AR-A2LL-01	0.0155154	29.5	3
BRCA	TCGA-AR-A2LM-01	0.0057949	8.82	2
BRCA	TCGA-AR-A2LN-01	0.0213103	6.41	2
BRCA	TCGA-AR-A2LO-01	0.00616876	11.9	1
BRCA	TCGA-AR-A2LQ-01	0.00392557	0.00365	1
BRCA	TCGA-AR-A2LR-01	0.0314046	46.6	1
BRCA	TCGA-AR-A5QM-01	0.0104682	27.7	2
BRCA	TCGA-AR-A5QN-01	0.0147676	18.8	2
BRCA	TCGA-AR-A5QP-01	0.0099074	10.1	1
BRCA	TCGA-AR-A5QQ-01	0.0319654	0.555	1
BRCA	TCGA-B6-A0I1-01	0.0244881	31.4	3
BRCA	TCGA-B6-A0I2-01	0.0304699	33.7	3
BRCA	TCGA-B6-A0I5-01	0.0121506	23.2	4
BRCA	TCGA-B6-A0I6-01	0.0543972	71.7	4
BRCA	TCGA-B6-A0I8-01	0.0652393	51.4	6
BRCA	TCGA-B6-A0I9-01	0.0386949	46.1	4
BRCA	TCGA-B6-A0IA-01	0.027666	22	1
BRCA	TCGA-B6-A0IB-01	0.0327131	50.1	3
BRCA	TCGA-B6-A0IC-01	0.0196279	7.36	2
BRCA	TCGA-B6-A0IE-01	0.0160762	33.9	5
BRCA	TCGA-B6-A0IG-01	NA	30.2	2
BRCA	TCGA-B6-A0IH-01	0.0149546	16.8	3
BRCA	TCGA-B6-A0IJ-01	0.0843064	26.1	3
BRCA	TCGA-B6-A0IK-01	0.0841195	33.3	5
BRCA	TCGA-B6-A0IM-01	0.0179455	20.9	5
BRCA	TCGA-B6-A0IN-01	0.0218711	20.8	6
BRCA	TCGA-B6-A0IO-01	NA	30.4	5
BRCA	TCGA-B6-A0IP-01	NA	6.04	4
BRCA	TCGA-B6-A0IQ-01	NA	44.8	2
BRCA	TCGA-B6-A0RE-01	0.0757075	45.7	4
BRCA	TCGA-B6-A0RG-01	0.0327131	26.1	4
BRCA	TCGA-B6-A0RH-01	0.0198148	26.8	4
BRCA	TCGA-B6-A0RI-01	0.0099074	8.89	1
BRCA	TCGA-B6-A0RL-01	0.0272921	30	3
BRCA	TCGA-B6-A0RM-01	0.0168239	7.51	2
BRCA	TCGA-B6-A0RN-01	0.0168239	6.85	3
BRCA	TCGA-B6-A0RO-01	0.0173847	44.2	3
BRCA	TCGA-B6-A0RP-01	0.0128983	19.6	6
BRCA	TCGA-B6-A0RQ-01	0.013833	3.17	3
BRCA	TCGA-B6-A0RS-01	0.0805677	39.5	5
BRCA	TCGA-B6-A0RT-01	0.0145807	4.13	2
BRCA	TCGA-B6-A0RU-01	0.0235534	17.7	2
BRCA	TCGA-B6-A0RV-01	0.0280398	15.2	2
BRCA	TCGA-B6-A0WS-01	0.0099074	20.2	3
BRCA	TCGA-B6-A0WT-01	0.00897274	15.1	4
BRCA	TCGA-B6-A0WV-01	0.0147676	40	2
BRCA	TCGA-B6-A0WW-01	0.0198148	28.6	7
BRCA	TCGA-B6-A0WX-01	0.0198148	37.6	3
BRCA	TCGA-B6-A0WY-01	0.0121506	7.93	2
BRCA	TCGA-B6-A0WZ-01	0.0325262	23.3	2
BRCA	TCGA-B6-A0X0-01	0.0123375	11.6	1
BRCA	TCGA-B6-A0X1-01	0.035704	36.5	2
BRCA	TCGA-B6-A0X4-01	0.013646	2.88	3
BRCA	TCGA-B6-A0X5-01	0.0205625	7.74	2
BRCA	TCGA-B6-A0X7-01	NA	15.8	2
BRCA	TCGA-B6-A1KC-01	0.0158892	44.6	3
BRCA	TCGA-B6-A1KF-01	0.0353302	49.6	6
BRCA	TCGA-B6-A1KI-01	0.0125245	9.17	2
BRCA	TCGA-B6-A1KN-01	0.0315915	24.6	3
BRCA	TCGA-B6-A2IU-01	0.0214972	20.7	2
BRCA	TCGA-B6-A3ZX-01	0.0213103	5.15	3
BRCA	TCGA-B6-A400-01	0.0658001	29.9	5
BRCA	TCGA-B6-A401-01	0.0112159	15	3
BRCA	TCGA-B6-A402-01	0.0229926	45.3	3
BRCA	TCGA-B6-A408-01	0.0125245	21.5	2
BRCA	TCGA-B6-A409-01	0.019254	22.1	1
BRCA	TCGA-B6-A40B-01	0.0287875	18.2	5
BRCA	TCGA-B6-A40C-01	0.0211233	18.9	2
BRCA	TCGA-BH-A0AU-01	0.0099074	15.7	1
BRCA	TCGA-BH-A0AV-01	0.0392557	39.2	1
BRCA	TCGA-BH-A0AW-01	0.0835587	25.8	8
BRCA	TCGA-BH-A0AY-01	0.0282267	20.4	2
BRCA	TCGA-BH-A0AZ-01	0.0401904	27.7	2
BRCA	TCGA-BH-A0B0-01	0.0394427	22.1	4
BRCA	TCGA-BH-A0B1-01	0.0308438	39.5	4
BRCA	TCGA-BH-A0B3-01	0.0190671	20.5	4
BRCA	TCGA-BH-A0B4-01	0.0411251	34.5	4
BRCA	TCGA-BH-A0B5-01	0.0373864	22.8	1
BRCA	TCGA-BH-A0B6-01	0.448263	7.36	10
BRCA	TCGA-BH-A0B7-01	0.011029	9.6	3
BRCA	TCGA-BH-A0B8-01	0.0272921	73.5	7
BRCA	TCGA-BH-A0B9-01	0.0216841	28.5	2
BRCA	TCGA-BH-A0BA-01	0.0214972	37.1	5
BRCA	TCGA-BH-A0BC-01	0.0173847	18.2	3
BRCA	TCGA-BH-A0BD-01	0.0125245	16.9	4
BRCA	TCGA-BH-A0BF-01	0.0149546	9.73	4
BRCA	TCGA-BH-A0BG-01	0.0198148	40	4
BRCA	TCGA-BH-A0BJ-01	0.0114029	18.6	2
BRCA	TCGA-BH-A0BL-01	0.0295353	18.4	4
BRCA	TCGA-BH-A0BM-01	0.0173847	8.8	1
BRCA	TCGA-BH-A0BO-01	0.00953354	3.17	2
BRCA	TCGA-BH-A0BP-01	0.0719689	32.2	5
BRCA	TCGA-BH-A0BQ-01	0.0100943	9.35	1
BRCA	TCGA-BH-A0BR-01	0.0271052	34.6	4
BRCA	TCGA-BH-A0BS-01	0.00878581	5.54	1
BRCA	TCGA-BH-A0BT-01	0.01645	40.2	3
BRCA	TCGA-BH-A0BV-01	0.0181324	16.5	1
BRCA	TCGA-BH-A0BW-01	0.0482285	33.9	2
BRCA	TCGA-BH-A0BZ-01	0.135713	11.2	5
BRCA	TCGA-BH-A0C0-01	0.0487893	16.5	3
BRCA	TCGA-BH-A0C1-01	0.0190671	18.9	2
BRCA	TCGA-BH-A0C3-01	0.00729035	5.7	1
BRCA	TCGA-BH-A0C7-01	0.024675	27.7	2
BRCA	TCGA-BH-A0DD-01	0.016637	32.7	6
BRCA	TCGA-BH-A0DE-01	0.0143938	18.5	2
BRCA	TCGA-BH-A0DG-01	0.0171978	13.3	2
BRCA	TCGA-BH-A0DH-01	0.0190671	21.6	2
BRCA	TCGA-BH-A0DI-01	0.0177586	9.84	4
BRCA	TCGA-BH-A0DK-01	0.0484154	19.9	4
BRCA	TCGA-BH-A0DL-01	0.0228057	15.5	4
BRCA	TCGA-BH-A0DO-01	0.00934661	15.1	2
BRCA	TCGA-BH-A0DP-01	0.0151415	18.3	1
BRCA	TCGA-BH-A0DQ-01	0.0151415	26.3	1
BRCA	TCGA-BH-A0DS-01	0.0183193	21.9	1
BRCA	TCGA-BH-A0DT-01	0.00691649	22.7	5
BRCA	TCGA-BH-A0DV-01	0.0057949	4.14	2
BRCA	TCGA-BH-A0DX-01	0.0332739	8.71	1
BRCA	TCGA-BH-A0DZ-01	0.171791	16.5	3
BRCA	TCGA-BH-A0E0-01	0.0151415	22.7	4
BRCA	TCGA-BH-A0E1-01	0.0173847	8.07	3
BRCA	TCGA-BH-A0E2-01	0.0243012	26.9	1
BRCA	TCGA-BH-A0E6-01	NA	29.2	3
BRCA	TCGA-BH-A0E7-01	0.0185063	7.52	2
BRCA	TCGA-BH-A0E9-01	0.00953354	4.16	3
BRCA	TCGA-BH-A0EA-01	0.0121506	5.57	4
BRCA	TCGA-BH-A0EB-01	0.0216841	12.3	2
BRCA	TCGA-BH-A0EE-01	0.0615007	21.7	4
BRCA	TCGA-BH-A0EI-01	0.00785115	13.2	1
BRCA	TCGA-BH-A0GY-01	0.0228057	25	2
BRCA	TCGA-BH-A0GZ-01	0.0171978	23.9	2
BRCA	TCGA-BH-A0H0-01	0.0117767	23.7	1
BRCA	TCGA-BH-A0H3-01	0.00710342	6.08	3
BRCA	TCGA-BH-A0H5-01	0.0327131	0.00331	2
BRCA	TCGA-BH-A0H6-01	0.0104682	9.19	2
BRCA	TCGA-BH-A0H7-01	0.0286006	41.3	3
BRCA	TCGA-BH-A0H9-01	0.0224319	8.59	6
BRCA	TCGA-BH-A0HA-01	0.146742	7.99	5
BRCA	TCGA-BH-A0HB-01	0.01645	27	3
BRCA	TCGA-BH-A0HF-01	0.550515	6.97	16
BRCA	TCGA-BH-A0HI-01	0.0130852	6.3	4
BRCA	TCGA-BH-A0HK-01	0.0603791	8.53	4
BRCA	TCGA-BH-A0HL-01	0.0175716	18.4	5
BRCA	TCGA-BH-A0HN-01	0.0158892	33.1	4
BRCA	TCGA-BH-A0HO-01	0.0142068	4.55	1
BRCA	TCGA-BH-A0HP-01	0.164126	16.5	7
BRCA	TCGA-BH-A0HQ-01	0.0171978	12.8	5
BRCA	TCGA-BH-A0HU-01	0.0218711	35.7	6
BRCA	TCGA-BH-A0HW-01	0.0155154	13.6	6
BRCA	TCGA-BH-A0HX-01	0.0340216	51.3	5
BRCA	TCGA-BH-A0HY-01	0.0308438	59.3	8
BRCA	TCGA-BH-A0RX-01	0.0106551	7.58	2
BRCA	TCGA-BH-A0W3-01	0.00915967	10.5	1
BRCA	TCGA-BH-A0W4-01	0.016637	1.94	2
BRCA	TCGA-BH-A0W5-01	0.0100943	4.47	3
BRCA	TCGA-BH-A0W7-01	0.116646	28.5	3
BRCA	TCGA-BH-A0WA-01	0.055145	38.8	5
BRCA	TCGA-BH-A18F-01	0.0263574	21.3	3
BRCA	TCGA-BH-A18G-01	0.714828	6.7	16
BRCA	TCGA-BH-A18H-01	0.0243012	12.5	3
BRCA	TCGA-BH-A18I-01	0.0106551	13.6	4
BRCA	TCGA-BH-A18J-01	0.0465461	20.9	2
BRCA	TCGA-BH-A18K-01	0.0284137	41	2
BRCA	TCGA-BH-A18L-01	0.0203756	39.7	3
BRCA	TCGA-BH-A18M-01	0.0099074	15.6	4
BRCA	TCGA-BH-A18N-01	0.0181324	13.3	4
BRCA	TCGA-BH-A18P-01	0.188428	10	6
BRCA	TCGA-BH-A18Q-01	0.0521541	66	3
BRCA	TCGA-BH-A18R-01	0.0173847	26.8	1
BRCA	TCGA-BH-A18S-01	0.0142068	12.4	1
BRCA	TCGA-BH-A18T-01	0.0456114	59.1	6
BRCA	TCGA-BH-A18U-01	0.0615007	48.9	5
BRCA	TCGA-BH-A18V-01	0.128422	67.7	5
BRCA	TCGA-BH-A18V-06	0.151415	20.7	2
BRCA	TCGA-BH-A1EN-01	0.0306569	61.8	3
BRCA	TCGA-BH-A1EO-01	0.0181324	22.8	1
BRCA	TCGA-BH-A1ES-01	0.0099074	17.6	3
BRCA	TCGA-BH-A1ES-06	0.0119637	46.4	3
BRCA	TCGA-BH-A1ET-01	0.0143938	8.37	2
BRCA	TCGA-BH-A1EU-01	0.000560796	11.2	1
BRCA	TCGA-BH-A1EV-01	0.0540234	37.8	6
BRCA	TCGA-BH-A1EW-01	0.00691649	17.7	1
BRCA	TCGA-BH-A1EX-01	0.0147676	21.3	3
BRCA	TCGA-BH-A1EY-01	0.0265444	18	5
BRCA	TCGA-BH-A1F0-01	0.0259836	6.59	3
BRCA	TCGA-BH-A1F2-01	0.0297222	43.7	3
BRCA	TCGA-BH-A1F5-01	0.0224319	13.6	3
BRCA	TCGA-BH-A1F6-01	0.0228057	30.3	3
BRCA	TCGA-BH-A1F8-01	0.0850541	90	8
BRCA	TCGA-BH-A1FB-01	NA	5.05	1
BRCA	TCGA-BH-A1FC-01	0.057762	35.6	2
BRCA	TCGA-BH-A1FD-01	0.0149546	43.4	4
BRCA	TCGA-BH-A1FE-01	0.00859888	4.99	3
BRCA	TCGA-BH-A1FE-06	0.000747728	0.0104	1
BRCA	TCGA-BH-A1FG-01	0.011029	10.9	6
BRCA	TCGA-BH-A1FH-01	0.0099074	2.34	3
BRCA	TCGA-BH-A1FJ-01	0.0157023	9.02	3
BRCA	TCGA-BH-A1FL-01	0.0114029	8.4	3
BRCA	TCGA-BH-A1FM-01	0.0299091	47.5	1
BRCA	TCGA-BH-A1FN-01	0.0732774	43.6	7
BRCA	TCGA-BH-A1FR-01	0.00766422	0.0507	3
BRCA	TCGA-BH-A1FU-01	0.0342086	5.05	2
BRCA	TCGA-BH-A201-01	0.0099074	11.6	1
BRCA	TCGA-BH-A202-01	0.0121506	25.5	3
BRCA	TCGA-BH-A203-01	0.0345824	17.2	4
BRCA	TCGA-BH-A204-01	0.0231796	22	3
BRCA	TCGA-BH-A208-01	0.035891	11.8	3
BRCA	TCGA-BH-A209-01	0.0540234	14.6	3
BRCA	TCGA-BH-A28O-01	0.00710342	0.0363	1
BRCA	TCGA-BH-A28Q-01	0.00878581	14.9	2
BRCA	TCGA-BH-A2L8-01	0.27479	9.99	10
BRCA	TCGA-BH-A42T-01	0.0171978	36.8	1
BRCA	TCGA-BH-A42U-01	0.00672956	0.00528	2
BRCA	TCGA-BH-A42V-01	0.0153284	3.69	4
BRCA	TCGA-BH-A5IZ-01	0.0474808	71	2
BRCA	TCGA-BH-A5J0-01	0.0334608	48.1	5
BRCA	TCGA-BH-A6R8-01	0.0186932	30.4	1
BRCA	TCGA-BH-A6R9-01	0.00392557	0.0212	1
BRCA	TCGA-BH-A8FY-01	0.0250489	16.8	3
BRCA	TCGA-BH-A8FZ-01	0.0304699	10.1	2
BRCA	TCGA-BH-A8G0-01	0.00654262	0.0105	1
BRCA	TCGA-BH-AB28-01	0.0142068	12.8	2
BRCA	TCGA-C8-A12K-01	0.0730905	24.9	3
BRCA	TCGA-C8-A12L-01	0.0364518	54.7	3
BRCA	TCGA-C8-A12M-01	0.0289745	31.7	1
BRCA	TCGA-C8-A12N-01	0.0125245	7.52	2
BRCA	TCGA-C8-A12O-01	0.0145807	14.8	4
BRCA	TCGA-C8-A12P-01	0.0925314	27.9	4
BRCA	TCGA-C8-A12Q-01	0.0637439	38.8	2
BRCA	TCGA-C8-A12T-01	0.100383	15.5	5
BRCA	TCGA-C8-A12U-01	0.0218711	46	2
BRCA	TCGA-C8-A12V-01	0.0155154	2.24	1
BRCA	TCGA-C8-A12W-01	0.0222449	22.4	2
BRCA	TCGA-C8-A12X-01	0.0252358	15.6	2
BRCA	TCGA-C8-A12Y-01	0.0142068	19.3	3
BRCA	TCGA-C8-A12Z-01	0.0284137	24.5	3
BRCA	TCGA-C8-A130-01	0.0231796	49.7	5
BRCA	TCGA-C8-A131-01	0.0297222	17.6	5
BRCA	TCGA-C8-A132-01	0.0263574	3.74	1
BRCA	TCGA-C8-A133-01	0.0168239	0.504	6
BRCA	TCGA-C8-A134-01	0.0618745	39.9	2
BRCA	TCGA-C8-A135-01	0.027479	8.8	3
BRCA	TCGA-C8-A137-01	0.0271052	21	1
BRCA	TCGA-C8-A138-01	0.0222449	30.9	6
BRCA	TCGA-C8-A1HE-01	0.0250489	11	3
BRCA	TCGA-C8-A1HF-01	0.016637	23	2
BRCA	TCGA-C8-A1HG-01	0.0205625	28.9	2
BRCA	TCGA-C8-A1HI-01	0.0231796	12.5	3
BRCA	TCGA-C8-A1HJ-01	0.0618745	48.8	3
BRCA	TCGA-C8-A1HK-01	0.0310307	47.6	5
BRCA	TCGA-C8-A1HL-01	0.0168239	14.8	3
BRCA	TCGA-C8-A1HM-01	0.195718	28.2	5
BRCA	TCGA-C8-A1HN-01	0.0282267	40.8	4
BRCA	TCGA-C8-A1HO-01	0.0179455	30.3	4
BRCA	TCGA-C8-A26V-01	0.0459853	16.4	3
BRCA	TCGA-C8-A26W-01	0.0336478	28.3	2
BRCA	TCGA-C8-A26X-01	0.0329001	16.3	3
BRCA	TCGA-C8-A26Y-01	0.458171	25.5	15
BRCA	TCGA-C8-A26Z-01	0.0188801	48.8	1
BRCA	TCGA-C8-A273-01	0.0100943	21.1	3
BRCA	TCGA-C8-A274-01	0.120945	38.6	7
BRCA	TCGA-C8-A275-01	0.0773899	20.9	5
BRCA	TCGA-C8-A278-01	0.0181324	13.8	2
BRCA	TCGA-C8-A27A-01	0.0157023	33.5	5
BRCA	TCGA-C8-A27B-01	0.0947746	34.2	4
BRCA	TCGA-C8-A3M7-01	0.0779507	9.41	3
BRCA	TCGA-C8-A3M8-01	0.0233665	24.1	3
BRCA	TCGA-C8-A8HP-01	0.0695387	2.32	1
BRCA	TCGA-C8-A8HQ-01	0.15721	18.3	4
BRCA	TCGA-C8-A8HR-01	0.0162631	1.71	1
BRCA	TCGA-D8-A13Y-01	0.0435552	87.4	3
BRCA	TCGA-D8-A13Z-01	0.0388819	32.2	5
BRCA	TCGA-D8-A140-01	0.0611268	21.7	5
BRCA	TCGA-D8-A141-01	0.00859888	3.19	1
BRCA	TCGA-D8-A142-01	0.0508455	34.9	2
BRCA	TCGA-D8-A143-01	0.0267313	41.6	5
BRCA	TCGA-D8-A145-01	0.0158892	3.85	1
BRCA	TCGA-D8-A146-01	0.0196279	11	1
BRCA	TCGA-D8-A147-01	0.088232	45.5	3
BRCA	TCGA-D8-A1J8-01	0.463218	70.9	10
BRCA	TCGA-D8-A1J9-01	0.115898	30.3	4
BRCA	TCGA-D8-A1JA-01	0.62211	24	13
BRCA	TCGA-D8-A1JB-01	0.0181324	6.15	1
BRCA	TCGA-D8-A1JC-01	0.0534626	34	5
BRCA	TCGA-D8-A1JD-01	0.0558927	35.2	3
BRCA	TCGA-D8-A1JE-01	0.0168239	20.4	2
BRCA	TCGA-D8-A1JF-01	0.0216841	39.5	6
BRCA	TCGA-D8-A1JG-01	0.060566	26.2	3
BRCA	TCGA-D8-A1JH-01	0.011029	0.0319	4
BRCA	TCGA-D8-A1JI-01	0.0196279	43.9	2
BRCA	TCGA-D8-A1JJ-01	0.0386949	37.1	6
BRCA	TCGA-D8-A1JK-01	0.109168	22.6	4
BRCA	TCGA-D8-A1JL-01	0.0714081	27.1	2
BRCA	TCGA-D8-A1JM-01	0.0250489	68.9	2
BRCA	TCGA-D8-A1JN-01	0.10356	11.8	7
BRCA	TCGA-D8-A1JP-01	0.0783246	37.1	5
BRCA	TCGA-D8-A1JS-01	0.0140199	5.72	4
BRCA	TCGA-D8-A1JT-01	0.019254	38.6	3
BRCA	TCGA-D8-A1JU-01	0.00691649	5.28	3
BRCA	TCGA-D8-A1X5-01	0.0278529	56.3	3
BRCA	TCGA-D8-A1X6-01	0.019254	13.2	4
BRCA	TCGA-D8-A1X7-01	0.0151415	7.93	1
BRCA	TCGA-D8-A1X8-01	0.0201887	11.3	1
BRCA	TCGA-D8-A1X9-01	0.0601921	26.4	2
BRCA	TCGA-D8-A1XA-01	0.0130852	76.3	2
BRCA	TCGA-D8-A1XB-01	0.0170108	16.8	3
BRCA	TCGA-D8-A1XC-01	0.0142068	4.81	2
BRCA	TCGA-D8-A1XD-01	NA	13.8	1
BRCA	TCGA-D8-A1XF-01	0.0194409	63.1	4
BRCA	TCGA-D8-A1XG-01	0.0158892	14.2	2
BRCA	TCGA-D8-A1XJ-01	0.0386949	33.2	4
BRCA	TCGA-D8-A1XK-01	0.617811	29	14
BRCA	TCGA-D8-A1XL-01	0.0459853	52.7	4
BRCA	TCGA-D8-A1XM-01	0.0342086	15.8	1
BRCA	TCGA-D8-A1XO-01	0.011029	20.7	3
BRCA	TCGA-D8-A1XQ-01	0.421719	35.3	13
BRCA	TCGA-D8-A1XR-01	0.0130852	18.3	1
BRCA	TCGA-D8-A1XS-01	0.0125245	16.7	2
BRCA	TCGA-D8-A1XT-01	0.0186932	33.9	4
BRCA	TCGA-D8-A1XU-01	0.0143938	44.7	2
BRCA	TCGA-D8-A1XV-01	0.0142068	4.18	1
BRCA	TCGA-D8-A1XW-01	0.0564535	32.2	3
BRCA	TCGA-D8-A1XY-01	0.0198148	29.2	2
BRCA	TCGA-D8-A1XZ-01	0.0342086	30.5	3
BRCA	TCGA-D8-A1Y0-01	0.0392557	36.2	2
BRCA	TCGA-D8-A1Y1-01	0.0807547	17.4	6
BRCA	TCGA-D8-A1Y2-01	0.0102813	30.4	2
BRCA	TCGA-D8-A1Y3-01	0.0272921	30.5	2
BRCA	TCGA-D8-A27E-01	0.0057949	0.0136	1
BRCA	TCGA-D8-A27F-01	0.0347694	69.2	3
BRCA	TCGA-D8-A27G-01	0.537243	10.1	21
BRCA	TCGA-D8-A27H-01	NA	42.9	4
BRCA	TCGA-D8-A27I-01	0.0157023	7.24	3
BRCA	TCGA-D8-A27K-01	0.0102813	11.2	2
BRCA	TCGA-D8-A27L-01	0.0194409	9.33	3
BRCA	TCGA-D8-A27M-01	0.0362648	11.7	1
BRCA	TCGA-D8-A27N-01	0.0226188	23.7	4
BRCA	TCGA-D8-A27P-01	0.0115898	4.55	4
BRCA	TCGA-D8-A27R-01	0.0149546	15.5	2
BRCA	TCGA-D8-A27T-01	0.00934661	18.5	2
BRCA	TCGA-D8-A27V-01	0.110851	34.9	6
BRCA	TCGA-D8-A27W-01	0.0132722	26.4	1
BRCA	TCGA-D8-A3Z5-01	0.00729035	11.7	1
BRCA	TCGA-D8-A3Z6-01	0.0145807	24.3	4
BRCA	TCGA-D8-A4Z1-01	0.0168239	1.2	1
BRCA	TCGA-D8-A73W-01	0.0179455	12.9	1
BRCA	TCGA-D8-A73X-01	0.0183193	9.14	2
BRCA	TCGA-E2-A105-01	NA	12.6	1
BRCA	TCGA-E2-A107-01	NA	22.2	1
BRCA	TCGA-E2-A108-01	NA	3.52	1
BRCA	TCGA-E2-A109-01	NA	22.9	3
BRCA	TCGA-E2-A10A-01	0.0130852	17.5	6
BRCA	TCGA-E2-A10B-01	NA	21.5	1
BRCA	TCGA-E2-A10C-01	0.228805	22.2	8
BRCA	TCGA-E2-A10E-01	NA	14.3	1
BRCA	TCGA-E2-A10F-01	NA	12.2	2
BRCA	TCGA-E2-A14N-01	0.00785115	5.44	2
BRCA	TCGA-E2-A14O-01	0.0162631	67.9	3
BRCA	TCGA-E2-A14P-01	0.0437421	24.5	4
BRCA	TCGA-E2-A14Q-01	0.013646	17	4
BRCA	TCGA-E2-A14R-01	0.0697257	65.5	2
BRCA	TCGA-E2-A14S-01	0.0162631	23.2	2
BRCA	TCGA-E2-A14T-01	0.0140199	45.3	2
BRCA	TCGA-E2-A14U-01	0.00373864	0.00152	3
BRCA	TCGA-E2-A14V-01	0.0499109	20.5	3
BRCA	TCGA-E2-A14W-01	0.0525279	27.1	3
BRCA	TCGA-E2-A14X-01	0.0123375	32.3	2
BRCA	TCGA-E2-A14Y-01	0.0185063	22.3	3
BRCA	TCGA-E2-A14Z-01	0.0396296	27.8	4
BRCA	TCGA-E2-A150-01	0.0342086	43.2	4
BRCA	TCGA-E2-A152-01	0.0747728	60	6
BRCA	TCGA-E2-A153-01	0.00859888	12.5	2
BRCA	TCGA-E2-A154-01	0.0237404	26.9	2
BRCA	TCGA-E2-A155-01	0.0327131	20.7	4
BRCA	TCGA-E2-A156-01	0.0114029	3.01	5
BRCA	TCGA-E2-A158-01	0.0499109	47	2
BRCA	TCGA-E2-A159-01	0.099261	15.9	7
BRCA	TCGA-E2-A15A-01	0.0261705	41	2
BRCA	TCGA-E2-A15A-06	0.0170108	21.9	3
BRCA	TCGA-E2-A15C-01	0.0151415	12.7	3
BRCA	TCGA-E2-A15D-01	0.0157023	21	2
BRCA	TCGA-E2-A15E-01	0.0168239	21.9	2
BRCA	TCGA-E2-A15E-06	0.0201887	37.6	2
BRCA	TCGA-E2-A15F-01	NA	22.8	2
BRCA	TCGA-E2-A15G-01	0.0300961	8.7	3
BRCA	TCGA-E2-A15H-01	0.0151415	18.6	4
BRCA	TCGA-E2-A15I-01	0.00280398	14	2
BRCA	TCGA-E2-A15J-01	0.0123375	10.2	2
BRCA	TCGA-E2-A15K-01	0.0222449	16.4	4
BRCA	TCGA-E2-A15K-06	0.0259836	14.1	4
BRCA	TCGA-E2-A15L-01	0.0170108	9.76	3
BRCA	TCGA-E2-A15M-01	0.0448637	12.3	3
BRCA	TCGA-E2-A15O-01	0.0188801	27.7	3
BRCA	TCGA-E2-A15P-01	0.0127114	18.8	1
BRCA	TCGA-E2-A15R-01	0.0205625	33.3	4
BRCA	TCGA-E2-A15S-01	0.0310307	34.6	2
BRCA	TCGA-E2-A15T-01	0.0162631	16.1	2
BRCA	TCGA-E2-A1AZ-01	0.0329001	26	2
BRCA	TCGA-E2-A1B0-01	0.0252358	16.1	2
BRCA	TCGA-E2-A1B1-01	0.0179455	1.64	1
BRCA	TCGA-E2-A1B4-01	0.0173847	2.82	3
BRCA	TCGA-E2-A1B5-01	0.0134591	3.51	1
BRCA	TCGA-E2-A1B6-01	0.00972047	0.198	2
BRCA	TCGA-E2-A1BC-01	0.0157023	13.3	1
BRCA	TCGA-E2-A1BD-01	0.0177586	32.5	3
BRCA	TCGA-E2-A1IE-01	0.0108421	24.9	2
BRCA	TCGA-E2-A1IF-01	0.00785115	5.79	2
BRCA	TCGA-E2-A1IG-01	0.0231796	11.7	2
BRCA	TCGA-E2-A1IH-01	0.041312	34.6	4
BRCA	TCGA-E2-A1II-01	0.0147676	13	3
BRCA	TCGA-E2-A1IJ-01	0.00822501	9.32	2
BRCA	TCGA-E2-A1IK-01	0.00672956	0.000129	1
BRCA	TCGA-E2-A1IL-01	0.0119637	15.6	3
BRCA	TCGA-E2-A1IN-01	0.120945	33.1	3
BRCA	TCGA-E2-A1IO-01	0.00355171	27	3
BRCA	TCGA-E2-A1IU-01	0.0114029	4.81	2
BRCA	TCGA-E2-A1L6-01	0.011029	12	1
BRCA	TCGA-E2-A1L7-01	0.0379472	43.6	2
BRCA	TCGA-E2-A1L8-01	0.016637	9.42	5
BRCA	TCGA-E2-A1L9-01	0.0114029	9.12	2
BRCA	TCGA-E2-A1LA-01	0.054958	33.7	2
BRCA	TCGA-E2-A1LB-01	0.0265444	9.87	2
BRCA	TCGA-E2-A1LE-01	0.0375734	40.6	5
BRCA	TCGA-E2-A1LG-01	0.0841195	53.1	5
BRCA	TCGA-E2-A1LH-01	0.0973916	18.4	4
BRCA	TCGA-E2-A1LI-01	0.0142068	21.5	1
BRCA	TCGA-E2-A1LK-01	0.0198148	28.2	2
BRCA	TCGA-E2-A1LL-01	0.0293483	21.3	2
BRCA	TCGA-E2-A1LS-01	0.044116	NA	2
BRCA	TCGA-E2-A2P5-01	0.0416859	60.8	5
BRCA	TCGA-E2-A2P6-01	0.0858018	13	2
BRCA	TCGA-E2-A3DX-01	0.00224319	0.00119	1
BRCA	TCGA-E2-A56Z-01	0.0196279	40.2	1
BRCA	TCGA-E2-A570-01	0.0132722	13.2	2
BRCA	TCGA-E2-A572-01	0.0108421	6.43	19
BRCA	TCGA-E2-A573-01	0.024862	22.4	2
BRCA	TCGA-E2-A574-01	0.0575751	54.9	1
BRCA	TCGA-E2-A576-01	0.0241142	27.3	3
BRCA	TCGA-E2-A9RU-01	0.0319654	39.9	2
BRCA	TCGA-E9-A1N3-01	0.0149546	7.35	1
BRCA	TCGA-E9-A1N4-01	0.0158892	18	4
BRCA	TCGA-E9-A1N5-01	0.019254	16.7	3
[truncated: 640 more rows]
